# Supplementary material for: A scalable platform for efficient CRISPR-Cas9 chemical-genetic screens of DNA damage-inducing compounds
Source: bioRxiv preprint, doi:10.1101/2023.06.16.545157, version 1 (2023-06-16)
Supplement: Supplementary Table 1 [file 545157_file22.xlsx]

## Sheet: BTZ_T6
gene	n_T6_DMSO	mean_T6_DMSO	variance_T6_DMSO	n_T6_80	mean_T6_80	variance_T6_80	differential_T6_80_vs_T6_DMSO	pval_T6_80_vs_T6_DMSO	fdr_T6_80_vs_T6_DMSO	significant_T6_80_vs_T6_DMSO	effect_type_T6_80
A1BG	3	-0.121008	0.0123051	3	-0.193339	0.0320239	-0.0859815	0.412588	0.795256	FALSE	None
ABCC1	3	0.00230384	0.0122664	3	0.110113	0.00511226	0.0485695	0.633153	0.879621	FALSE	None
ACACA	3	-0.462983	0.0490341	3	-0.219234	0.0302828	0.256264	0.0320661	0.330477	FALSE	None
ACO2	3	-0.21783	0.0289969	3	-0.207113	0.0382414	-0.00330927	0.973198	0.992859	FALSE	None
ACTB	3	0.354763	0.0347032	3	0.0191958	0.0510515	-0.3818	0.00130505	0.0484942	TRUE	None
ACTG1	3	0.326142	0.0389241	3	0.061962	0.00450623	-0.340658	0.00134439	0.0484942	TRUE	None
ACTR1A	3	-0.607682	0.102543	3	-0.561533	0.077009	0.0550595	0.59612	0.869937	FALSE	None
ACTR1B	3	-0.625226	0.303805	3	-0.532057	0.294561	0.0670359	0.597371	0.869937	FALSE	None
AGK	3	-0.00206563	0.0753848	3	0.0603157	0.0248334	0.0061327	0.946606	0.98829	FALSE	None
AHCYL1	3	-0.262084	0.0177826	3	-0.323982	0.0520295	-0.0724457	0.489434	0.835015	FALSE	None
AKIRIN1	3	-0.396697	0.000668814	3	-0.592694	0.0838362	-0.193285	0.0739362	0.444497	FALSE	None
AKT1	3	-0.0201783	0.00574075	3	-0.147343	0.0151979	-0.152889	0.117741	0.510424	FALSE	None
AKT3	3	-0.105405	0.00498621	3	-0.20554	0.0179753	-0.107777	0.287644	0.721527	FALSE	None
ALDH18A1	3	-0.137323	0.0224483	3	-0.0831271	0.00367577	0.0114374	0.913623	0.97995	FALSE	None
ALG12	3	-0.0703808	0.0152131	3	-0.165607	0.0276716	-0.114985	0.205161	0.643349	FALSE	None
ALG6	3	-0.419204	0.085639	3	-0.277968	0.0238622	0.139445	0.191556	0.620506	FALSE	None
ALG8	3	-0.297631	0.00973762	3	-0.276367	0.0115128	0.0188236	0.841369	0.961293	FALSE	None
ALG9	3	-0.230048	0.026167	3	-0.167933	0.000144719	0.0445108	0.623304	0.876229	FALSE	None
ALK	3	-0.468274	0.566581	3	-0.265112	0.204399	0.148175	0.158962	0.571359	FALSE	None
ALKBH1	3	-0.0845333	0.00335333	3	0.0379021	0.0122391	0.0530322	0.567875	0.865512	FALSE	None
AMOT	3	-0.31517	0.0664756	3	-0.14595	0.0196702	0.173722	0.0787978	0.454776	FALSE	None
ANAPC5	3	-1.12218	0.755456	3	-1.20092	0.895689	-0.153974	0.158034	0.570995	FALSE	None
ANKDD1A	3	-0.232069	0.01136	3	-0.369361	0.0365607	-0.113755	0.330699	0.758658	FALSE	None
ANKRD11	3	-0.35813	0.107791	3	-0.361327	0.096428	-0.00556407	0.948845	0.98829	FALSE	None
ANP32B	3	0.0476759	0.0982128	3	-0.378119	0.0785575	-0.438625	5.82496e-05	0.00613341	TRUE	None
AP2S1	3	-0.401919	0.0210314	3	-0.439747	0.00331206	-0.023101	0.877528	0.97289	FALSE	None
APC	3	0.0571275	0.00711243	3	0.105561	0.0148886	-0.0242453	0.774674	0.932564	FALSE	None
APC2	3	-0.16091	0.0608178	3	0.00877372	0.00513957	0.12383	0.255059	0.699158	FALSE	None
APEX1	3	-0.335136	0.0179425	3	-0.192849	0.0118528	0.153273	0.0769344	0.450072	FALSE	None
ARF1	3	-0.843766	0.00976575	3	-0.755155	0.0154017	0.105274	0.323952	0.752165	FALSE	None
ARF4	3	-2.11834	0.223392	3	-2.17275	0.135243	-0.280081	0.0831387	0.469107	FALSE	None
ARGLU1	3	-0.496171	0.00538017	3	-0.372373	0.195222	0.135976	0.370066	0.776438	FALSE	None
ARHGAP5	3	-0.696773	0.0765489	3	-0.568299	0.229668	0.123297	0.208346	0.643349	FALSE	None
ARID1A	3	-0.350945	0.0629049	3	-0.204949	0.0359564	0.152948	0.107136	0.500828	FALSE	None
ARID1B	3	-0.436914	0.00310849	3	-0.309361	0.0661032	0.119645	0.210203	0.643349	FALSE	None
ARID2	3	-0.486945	0.133862	3	-0.398712	0.0406091	0.042605	0.750909	0.927896	FALSE	None
ARID3B	3	-0.178703	0.139375	3	-0.395241	0.0460198	-0.210993	0.0745977	0.445821	FALSE	None
ASNS	3	-0.101383	0.0396779	3	0.00497131	0.0223709	0.0516927	0.56435	0.863626	FALSE	None
ATAD3A	3	-0.082077	0.0923517	3	-0.151485	0.0393415	-0.113367	0.355849	0.772323	FALSE	None
ATAD5	3	-0.555068	0.00431465	3	-0.527304	0.000363359	0.0395775	0.67135	0.90288	FALSE	None
ATG9A	3	0.129124	0.0652275	3	0.151141	0.0102874	-0.0503851	0.561644	0.863626	FALSE	None
ATM	3	-0.307614	0.00506977	3	-0.179311	0.144324	0.124083	0.244145	0.69108	FALSE	None
ATP2B1	3	-0.198114	0.00859516	3	-0.0632572	0.0122819	0.109377	0.272332	0.710737	FALSE	None
ATP2C1	3	-0.288451	0.0100043	3	-0.0395725	0.028824	0.198501	0.0566031	0.417313	FALSE	None
ATP9A	3	-0.230634	0.0197289	3	-0.206122	0.0128384	0.0120693	0.901385	0.97995	FALSE	None
ATP9B	3	-0.0404727	0.0147834	3	-0.0660901	0.016416	-0.0737778	0.382453	0.778461	FALSE	None
ATR	3	-0.938591	0.480729	3	-0.622086	0.173067	0.298822	0.00460619	0.116306	TRUE	None
ATRIP	3	-0.543928	0.0475597	3	-0.389924	0.00969299	0.164926	0.0904503	0.472668	FALSE	None
ATRX	3	-0.630454	0.0371915	3	-0.692997	0.0190093	-0.0520438	0.637118	0.880286	FALSE	None
AUP1	3	-0.664387	0.539368	3	-0.85515	1.02806	-0.277483	0.0460199	0.388695	FALSE	None
B3GNT2	3	-0.464121	0.0300676	3	-0.112757	0.00685238	0.340888	0.000891194	0.0375044	TRUE	None
BABAM1	3	0.0829357	0.0228466	3	-0.00847859	0.00112198	-0.176131	0.0876122	0.472668	FALSE	None
BAK1	3	-0.727495	0.0791118	3	-0.857939	0.252841	-0.165448	0.158296	0.570995	FALSE	None
BAP1	3	-1.28502	0.0486693	3	-1.02942	0.050715	0.168157	0.166783	0.580466	FALSE	None
BARD1	3	-0.560135	0.0244337	3	-0.281932	0.0206004	0.291002	0.00786925	0.152845	TRUE	None
BAX	3	-0.107843	0.00812315	3	-0.0465065	0.000456679	0.0105064	0.915459	0.97995	FALSE	None
BCL2	3	-0.111474	0.00173262	3	-0.00879199	0.00270402	0.0586245	0.553656	0.862295	FALSE	None
BCL2L2	3	-0.221454	0.0241594	3	-0.28067	0.0198729	-0.0742843	0.402582	0.790976	FALSE	None
BIRC6	3	-1.00268	0.0399627	3	-0.730932	0.17907	0.270362	0.117463	0.510424	FALSE	None
BLM	3	-0.203334	0.0288214	3	-0.133809	0.0578869	0.0600987	0.459174	0.821136	FALSE	None
BMI1	3	0.173395	0.0192052	3	0.0428227	0.000815907	-0.203527	0.0372963	0.362205	FALSE	None
BMPR1A	3	-0.118865	0.0360779	3	-0.130672	0.0673194	-0.0528869	0.655358	0.890864	FALSE	None
BOLA3	3	-0.0369826	0.00583275	3	0.062461	0.0547406	0.0448851	0.624659	0.876229	FALSE	None
BPTF	3	-0.61485	0.0152288	3	-0.392282	0.0497772	0.244428	0.0542881	0.410311	FALSE	None
BRAF	3	-0.240873	0.0261548	3	-0.17496	0.0114325	0.065966	0.461569	0.821136	FALSE	None
BRCA1	3	-0.497643	0.0203813	3	-0.424299	0.0705419	0.0588018	0.634941	0.879684	FALSE	None
BRCA2	3	-0.420591	0.0583027	3	-0.280288	0.0757067	0.121308	0.296204	0.725944	FALSE	None
BRD1	3	0.111542	0.0381255	3	0.212026	0.00985221	0.0327835	0.718174	0.913546	FALSE	None
BRD4	3	-0.734691	0.0163821	3	-0.486889	0.0354628	0.270801	0.0260234	0.302111	FALSE	None
BRD7	3	-0.360987	0.044707	3	-0.265132	0.0272545	0.112488	0.214429	0.649133	FALSE	None
BRINP3	3	-0.013718	0.0100615	3	0.118759	0.00918649	0.0436664	0.626374	0.876229	FALSE	None
BRIP1	3	-0.283369	0.129841	3	-0.222906	0.168058	0.0351752	0.697771	0.904029	FALSE	None
BRMS1	3	-0.277568	0.029692	3	-0.194225	0.0622081	0.0739066	0.577256	0.8695	FALSE	None
BRPF1	3	-0.194829	0.00143288	3	-0.016965	0.0242074	0.156472	0.117627	0.510424	FALSE	None
EMSY	3	-0.248118	0.0273541	3	-0.269503	0.00742586	-0.0264416	0.771331	0.929663	FALSE	None
MTRFR	3	-0.242835	0.00779581	3	-0.115353	0.0638775	0.108933	0.251932	0.697488	FALSE	None
C19orf53	3	-0.380404	0.00433604	3	-0.245489	0.0304756	0.150998	0.100225	0.484339	FALSE	None
C1orf115	3	0.0767875	0.0554528	3	-0.0503014	0.0439016	-0.1905	0.0764203	0.450072	FALSE	None
C22orf39	3	-0.221669	0.0214572	3	-0.15636	0.0406339	0.034883	0.680991	0.903685	FALSE	None
C6orf136	3	-0.407977	0.0411243	3	-0.333399	0.00691283	0.102937	0.33451	0.758658	FALSE	None
C7orf26	3	-0.494067	0.0249772	3	-0.229725	0.0569929	0.268498	0.01376	0.22783	TRUE	None
FMC1-LUC7L2	3	-0.0390331	0.0257089	3	-0.291238	0.0625485	-0.277671	0.0620265	0.424289	FALSE	None
PAXX	3	-0.0891883	0.0431027	3	-0.143942	0.0136421	-0.0828698	0.368935	0.776438	FALSE	None
CAB39	3	0.468051	0.0142356	3	0.227373	0.040338	-0.306055	0.0070122	0.148646	TRUE	None
CABIN1	3	-0.381835	0.019794	3	-0.478991	0.0853802	-0.121946	0.287636	0.721527	FALSE	None
CAP1	3	-0.300383	0.0426302	3	-0.318268	0.0101479	-0.0157459	0.893766	0.97995	FALSE	None
CBS	3	-0.041585	0.00808741	3	-0.220781	0.031506	-0.199504	0.0961971	0.478599	FALSE	None
CCAR2	3	-0.448006	0.110077	3	-0.493386	0.0968391	-0.0514351	0.666629	0.901035	FALSE	None
SGF29	3	-0.279399	0.00442163	3	-0.243939	0.00557478	0.0306919	0.758784	0.927896	FALSE	None
CCDC51	3	0.09688	0.061377	3	0.0221036	0.0181367	-0.111895	0.233297	0.673228	FALSE	None
CCNA2	3	-2.58098	0.0955698	3	-2.01985	0.401346	0.323904	0.0156156	0.246404	TRUE	None
CCNC	3	0.27214	0.010286	3	-0.0985979	0.0835688	-0.421023	9.13083e-05	0.00838376	TRUE	None
CCND1	3	-2.40116	0.535883	3	-2.09725	0.442083	0.0647818	0.675119	0.903685	FALSE	None
CCND3	3	-0.155078	0.0182894	3	-0.299589	0.0286962	-0.156659	0.113603	0.510424	FALSE	None
CCNE1	3	-0.154062	0.0354093	3	0.0588087	0.0283406	0.166297	0.0629155	0.425042	FALSE	None
CCNO	3	-0.195571	0.0983915	3	-0.110809	0.0513675	0.0478347	0.617002	0.875621	FALSE	None
CCS	3	-0.234773	0.0227685	3	-0.0882379	0.181014	0.129669	0.209978	0.643349	FALSE	None
CD44	3	-0.510475	0.0587163	3	-0.425614	0.0367032	0.111653	0.243691	0.69108	FALSE	None
CD46	3	-0.110836	0.0176466	3	-0.0765378	0.0287816	-0.00170237	0.985375	0.993803	FALSE	None
CD55	3	-0.135189	0.0160315	3	-0.142895	0.0216285	-0.0250095	0.779258	0.93363	FALSE	None
CD59	3	-0.230921	0.02239	3	-0.0106141	0.00225356	0.193812	0.1081	0.500828	FALSE	None
CDC25A	3	-0.17394	0.0104244	3	-0.274112	0.0184026	-0.138697	0.191681	0.620506	FALSE	None
CDC40	3	-1.95895	0.0814921	3	-1.87383	0.0759762	-0.124617	0.405254	0.790976	FALSE	None
CDC42	3	-1.39712	0.975687	3	-1.42795	0.926527	-0.161355	0.365159	0.775704	FALSE	None
CDC45	3	-2.63955	1.35315	3	-2.39649	0.805148	-0.0153491	0.9113	0.97995	FALSE	None
CDK11A	3	-1.51165	0.384976	3	-1.19082	0.191386	0.196563	0.249415	0.694325	FALSE	None
CDK13	3	0.288634	0.00261574	3	0.101228	0.0342294	-0.272949	0.0219928	0.27675	TRUE	None
CDK4	3	-1.57801	0.000667832	3	-1.49853	0.0964308	-0.0707	0.69605	0.904029	FALSE	None
CDK5	3	-0.137309	0.0214906	3	-0.108288	0.011232	-0.0105627	0.928798	0.981262	FALSE	None
CDK6	3	-0.538648	0.014761	3	-0.581107	0.0880633	-0.00766552	0.938131	0.9873	FALSE	None
CDKN1B	3	0.10328	0.00761883	3	0.169121	0.0193978	0.00281335	0.978665	0.993765	FALSE	None
CDKN2A	3	0.154916	0.0279808	3	0.023562	0.0935977	-0.19316	0.117055	0.510424	FALSE	None
CDKN2B	3	0.00612559	0.0494085	3	0.078707	0.0422701	0.00804391	0.922191	0.980649	FALSE	None
CDS2	3	-1.13761	0.129085	3	-1.16926	0.0876672	-0.110058	0.319573	0.749351	FALSE	None
CDX2	3	-0.0688033	0.0898747	3	-0.144438	7.46022e-05	-0.0854109	0.492345	0.837348	FALSE	None
CELF1	3	-0.247611	0.053396	3	-0.363798	0.0594975	-0.115856	0.281348	0.717579	FALSE	None
CELSR2	3	-0.163206	0.0330668	3	-0.334422	0.0380509	-0.177159	0.0851626	0.472668	FALSE	None
CHD1L	3	-0.0237046	0.0156963	3	0.00157848	0.0468845	-0.0246485	0.789029	0.939763	FALSE	None
CHD2	3	-0.262593	0.0393977	3	-0.137175	0.0104457	0.106951	0.276794	0.716825	FALSE	None
CHD4	3	-0.543486	0.0101582	3	-0.431898	0.122247	0.128713	0.302828	0.731434	FALSE	None
CHD8	3	0.152694	0.0115801	3	-0.22953	0.0433024	-0.434916	6.07268e-05	0.00613341	TRUE	None
CHEK1	3	-2.72088	5.46231	3	-2.60708	6.12951	-0.117461	0.330271	0.758658	FALSE	None
CHEK2	3	-0.198759	0.0426653	3	-0.36136	0.0967533	-0.164704	0.0955079	0.478599	FALSE	None
CHMP5	3	-1.12089	0.0517679	3	-1.22596	0.142935	-0.192406	0.297693	0.725944	FALSE	None
CHTF18	3	-0.234254	0.0265537	3	-0.533109	0.277778	-0.313995	0.187429	0.620506	FALSE	None
CIT	3	-0.400459	0.0474164	3	-0.368814	0.0544953	0.027217	0.762364	0.927896	FALSE	None
CLPP	3	-0.144875	0.00109492	3	-0.159588	0.0224374	-0.048671	0.628163	0.876305	FALSE	None
CLPX	3	-0.132909	0.0241268	3	-0.221029	0.00853592	-0.124741	0.19126	0.620506	FALSE	None
CLSPN	3	-0.565492	0.0647663	3	-0.754858	0.00669146	-0.186004	0.0485755	0.398872	FALSE	None
COIL	3	-0.40878	0.0106814	3	-0.249364	0.0517989	0.175259	0.0540485	0.410311	FALSE	None
COMMD8	3	-0.205067	0.00246542	3	-0.0950774	0.0256577	0.0849162	0.418996	0.798437	FALSE	None
COQ2	3	-0.108421	0.00541672	3	-0.107188	0.0341289	-0.0098838	0.912228	0.97995	FALSE	None
COQ7	3	-0.148802	0.028761	3	-0.0190286	0.0104026	0.0951163	0.355027	0.772323	FALSE	None
COX5A	3	-0.234733	0.0606107	3	-0.600526	0.0783254	-0.351104	0.020394	0.27675	TRUE	None
CPD	3	-0.175693	0.0294342	3	-0.360541	0.0542754	-0.180524	0.121551	0.513667	FALSE	None
CPOX	3	-0.376309	0.0134323	3	-0.230691	0.00159691	0.145063	0.144472	0.552714	FALSE	None
CRABP2	3	0.0351128	0.00302181	3	0.0509897	0.0354411	-0.0424969	0.622999	0.876229	FALSE	None
CRAMP1	3	0.0898859	0.0237302	3	-0.0973079	0.01327	-0.244761	0.0310266	0.325783	FALSE	None
CREBBP	3	-0.150022	0.0114005	3	-0.149865	0.0310477	-0.0192336	0.852054	0.963689	FALSE	None
CS	3	-0.376169	0.00326446	3	-0.268723	0.0494391	0.10252	0.303971	0.731434	FALSE	None
CSK	3	-0.140361	0.00594953	3	-0.0973427	0.0221202	0.0300982	0.736077	0.916693	FALSE	None
CSNK2A2	3	-0.314934	0.0907643	3	-0.338247	0.0271826	-0.0303697	0.780236	0.933695	FALSE	None
CTDNEP1	3	-0.573793	0.203657	3	-0.77415	0.0675592	-0.231467	0.065969	0.433668	FALSE	None
CTNNA1	3	-0.0778583	0.0403964	3	0.034827	0.0802786	0.0649889	0.508025	0.842231	FALSE	None
CTNNB1	3	-0.39839	0.0120145	3	-0.338923	0.0586414	0.0747881	0.470254	0.824577	FALSE	None
CUL4A	3	-0.146561	0.0392105	3	-0.141651	0.00524409	-0.0200203	0.83479	0.958112	FALSE	None
CUL5	3	0.45096	0.00847527	3	0.351951	0.00746201	-0.158224	0.0721271	0.441529	FALSE	None
TASL	3	-0.222557	0.0193407	3	-0.394959	0.00796893	-0.160841	0.156567	0.570731	FALSE	None
CFAP47	3	-0.137359	0.00961344	3	0.0817145	0.0161219	0.157208	0.0903507	0.472668	FALSE	None
BCLAF3	3	-0.175739	0.012347	3	-0.0587361	0.00199505	0.098365	0.266336	0.705892	FALSE	None
LINC01560	3	-0.189883	0.0388166	3	-0.174493	0.00735554	-0.0039059	0.971179	0.992859	FALSE	None
H2AP	3	-0.162792	0.00741532	3	0.0732825	0.061788	0.200275	0.0355264	0.348365	FALSE	None
LINC01545	3	-0.286296	0.0118846	3	-0.123755	0.0359623	0.138005	0.124081	0.517862	FALSE	None
DIPK2B	3	-0.178351	0.00452492	3	-0.302051	0.0170602	-0.132179	0.190048	0.620506	FALSE	None
CXXC1	3	0.228228	0.00183491	3	0.0622965	0.0559588	-0.232644	0.0196917	0.273519	TRUE	None
CYB5B	3	-0.277033	0.0830553	3	-0.194521	0.00792446	0.0737097	0.46867	0.823229	FALSE	None
CYB5R4	3	-0.159494	0.0411172	3	-0.274783	0.0246878	-0.103562	0.310964	0.739086	FALSE	None
DAPK3	3	-0.0303993	0.0104108	3	0.135229	0.028761	0.0828496	0.38713	0.782003	FALSE	None
DAXX	3	-0.258699	0.0178757	3	-0.227406	0.0214226	-0.00218813	0.980344	0.993765	FALSE	None
DAZAP1	3	-0.320632	0.0894702	3	-0.207847	0.184263	0.0836651	0.397709	0.789166	FALSE	None
DBF4	3	-0.376453	0.0885228	3	-0.389894	0.206945	-0.0301925	0.761576	0.927896	FALSE	None
DCLRE1A	3	-0.0383154	0.0149118	3	-0.0607068	0.0284159	-0.0650705	0.449803	0.814234	FALSE	None
DCLRE1B	3	-0.338664	0.0556334	3	-0.424484	0.00396187	-0.0835745	0.440777	0.806202	FALSE	None
DCLRE1C	3	-0.141142	0.0137108	3	-0.159407	0.00640797	-0.0411754	0.674332	0.903685	FALSE	None
DCTN1	3	-0.429541	0.0179791	3	-0.266623	0.0407441	0.171343	0.116064	0.510424	FALSE	None
DCTN3	3	-0.587905	0.0121309	3	-0.5111	0.0170722	0.11094	0.273529	0.712022	FALSE	None
DDB1	3	-1.00814	0.20827	3	-0.944195	0.261186	0.0152774	0.886337	0.976402	FALSE	None
DDB2	3	-0.271776	0.00122931	3	-0.294579	0.0156692	-0.0151271	0.871828	0.970834	FALSE	None
DDI2	3	-0.102902	0.0178371	3	-0.616865	0.0748149	-0.528693	2.04547e-05	0.0025824	TRUE	None
DDX5	3	-0.172975	0.00711192	3	-0.146385	0.0360545	0.0164406	0.855496	0.965248	FALSE	None
DET1	3	0.0222374	0.0115375	3	0.00804938	0.0503611	-0.0754893	0.435953	0.804489	FALSE	None
DHX29	3	0.0366432	0.0192318	3	0.144325	0.0057607	0.0307538	0.719227	0.913735	FALSE	None
DHX35	3	-0.390923	0.0371472	3	-0.369249	0.00459367	0.0265241	0.771179	0.929663	FALSE	None
DIAPH1	3	-0.283539	0.053898	3	-0.323917	0.00134583	-0.0268135	0.801788	0.946519	FALSE	None
DIS3L	3	-0.222991	0.0499422	3	-0.302492	0.136442	-0.102734	0.304161	0.731434	FALSE	None
DNA2	3	-1.98947	0.743467	3	-1.56901	0.224691	0.252552	0.143952	0.552714	FALSE	None
DNAJB5	3	-0.179396	0.0215836	3	0.100194	0.0457367	0.232808	0.0166014	0.251011	TRUE	None
DNMT3A	3	-0.193199	0.0027687	3	-0.242032	0.00461951	-0.0639272	0.441416	0.806202	FALSE	None
DOCK2	3	-0.0994301	0.00389375	3	0.0503785	0.0193638	0.0899187	0.33255	0.758658	FALSE	None
DOT1L	3	0.115845	0.0184108	3	-0.17315	0.00997624	-0.331749	0.0031799	0.091763	TRUE	None
DPF2	3	-0.78822	0.0760517	3	-0.603682	0.00654802	0.196825	0.0589158	0.417313	FALSE	None
DPM2	3	-0.32493	0.215946	3	-0.724928	0.518941	-0.424837	0.00965828	0.177361	TRUE	None
DVL3	3	-0.190999	0.00357312	3	-0.295739	0.0135819	-0.110762	0.255435	0.699158	FALSE	None
DYRK1A	3	0.510709	0.111206	3	0.563162	0.122703	0.0499725	0.570928	0.866767	FALSE	None
E2F3	3	-0.480943	0.0444052	3	-0.600755	0.0365989	-0.0967347	0.423305	0.798437	FALSE	None
E2F7	3	-0.247542	0.018094	3	-0.618145	0.0826776	-0.350732	0.00345663	0.0969776	TRUE	None
ECSIT	3	-0.0598479	0.0254741	3	0.0930707	0.0646989	0.11139	0.319554	0.749351	FALSE	None
EDC3	3	-0.230965	0.0955521	3	-0.582096	0.0451058	-0.325601	0.00428282	0.113833	TRUE	None
EDF1	3	-0.210575	5.49118e-05	3	-0.157219	0.0497162	0.0376362	0.695914	0.904029	FALSE	None
EED	3	-0.0976601	0.0744963	3	-0.0750981	0.053576	-0.0273784	0.782983	0.935763	FALSE	None
EEFSEC	3	-0.316339	0.00543623	3	-0.0522806	2.74285e-05	0.26241	0.00864161	0.16468	TRUE	None
EGFR	3	-0.145749	0.00591216	3	-0.34801	0.0139323	-0.199335	0.0879538	0.472668	FALSE	None
EHMT2	3	-0.29861	0.0469107	3	-0.304639	0.0430845	-0.00988252	0.922107	0.980649	FALSE	None
EIF2AK4	3	0.0656715	0.00479881	3	0.09941	0.0346969	-0.00870971	0.940464	0.988208	FALSE	None
EIF2S1	3	-3.29597	0.0989687	3	-2.49992	0.237342	0.497825	0.000638413	0.0339367	TRUE	None
EIF3I	3	-2.49401	0.0580082	3	-2.20547	0.111858	0.0474426	0.783817	0.935763	FALSE	None
EIF4A1	3	-1.95245	0.0569939	3	-1.70456	0.00159357	0.057062	0.639948	0.881784	FALSE	None
EIF4B	3	-0.812992	0.228812	3	-0.734051	0.274466	0.0424423	0.63048	0.877113	FALSE	None
EIF4ENIF1	3	-0.865866	0.0367954	3	-0.573594	0.00220442	0.291465	0.0182972	0.264003	TRUE	None
EIF4G1	3	-0.696311	0.211023	3	-0.53278	0.118339	0.153651	0.145844	0.55569	FALSE	None
EIF4H	3	-0.463969	0.0459879	3	-0.20507	0.0121173	0.264721	0.0257372	0.302111	FALSE	None
ELAVL1	3	-0.46617	0.0425339	3	-0.211861	0.0171047	0.261508	0.0517836	0.40381	FALSE	None
ELF2	3	-0.421412	0.0221116	3	-0.289511	0.00831389	0.128678	0.181508	0.610984	FALSE	None
ELMO1	3	-0.167047	0.0564097	3	-0.0814637	0.0608937	0.0470796	0.62801	0.876305	FALSE	None
EME1	3	-0.204933	0.0163005	3	-0.247116	0.0245657	-0.0421802	0.667301	0.901035	FALSE	None
EP300	3	0.306906	0.026955	3	0.412237	0.0165055	0.0573759	0.501879	0.842231	FALSE	None
EPC2	3	-0.355349	0.00278697	3	-0.364501	0.0271398	0.0122446	0.886209	0.976402	FALSE	None
EPHA7	3	-0.0224619	0.0452367	3	-0.00113638	0.00939409	-0.0504144	0.585142	0.8695	FALSE	None
ERBB2	3	-0.219973	0.0122032	3	-0.210547	0.0182054	-0.000313802	0.997305	0.999211	FALSE	None
ERBB3	3	-0.0742945	0.0236499	3	-0.0396477	0.0818088	0.00460287	0.96432	0.992698	FALSE	None
ERCC1	3	-0.157783	0.0243219	3	-0.0346954	0.000532362	0.0619211	0.546824	0.862295	FALSE	None
ERCC2	3	-0.546544	0.101014	3	-0.311471	0.0094241	0.257818	0.0302985	0.325783	FALSE	None
ERCC4	3	-0.194918	0.000820476	3	-0.0616021	0.0970093	0.0957328	0.409525	0.793897	FALSE	None
ERCC6	3	-0.194649	0.0271087	3	-0.0834479	0.0177622	0.0652181	0.472996	0.825435	FALSE	None
ERCC8	3	-0.213039	0.026757	3	-0.228443	0.000955585	-0.0239203	0.80087	0.946519	FALSE	None
ERG	3	-0.00654604	0.00642443	3	-0.0910086	0.0527106	-0.13382	0.127226	0.52393	FALSE	None
ETFA	3	-0.140403	0.0317722	3	-0.255616	0.0704153	-0.128963	0.188702	0.620506	FALSE	None
ETV1	3	-0.20966	0.197486	3	-0.155588	0.0444416	0.00999833	0.926124	0.980649	FALSE	None
EXO1	3	-0.0787692	0.0689285	3	-0.0537522	0.00848287	-0.0223236	0.814327	0.952327	FALSE	None
EXT1	3	0.300237	0.0575418	3	0.182578	0.00731678	-0.188543	0.0510552	0.402857	FALSE	None
EXT2	3	0.0147903	0.032371	3	-0.051486	0.11954	-0.118709	0.285436	0.721527	FALSE	None
EXTL3	3	0.263917	0.0295898	3	0.106284	0.0358444	-0.232656	0.0255172	0.302111	FALSE	None
EZH2	3	-0.012558	0.0261413	3	0.163859	0.00194086	0.0913893	0.338125	0.759801	FALSE	None
F2R	3	-0.203468	0.0255407	3	-0.335788	0.0265271	-0.134243	0.136012	0.542971	FALSE	None
FAM111A	3	-0.174016	0.0133093	3	-0.143617	0.107248	0.0186025	0.856299	0.965248	FALSE	None
FAM111B	3	-0.12446	0.0202517	3	-0.109666	0.0119811	-0.00481596	0.963282	0.992698	FALSE	None
FAM136A	3	-0.381749	0.109577	3	-0.16492	0.0584688	0.210572	0.0599783	0.417313	FALSE	None
ABRAXAS1	3	-0.255091	0.0277516	3	-0.252029	0.0096385	0.00347121	0.974866	0.993557	FALSE	None
SHLD2	3	-0.403733	0.0287792	3	-0.383736	0.041115	0.0285693	0.813622	0.952327	FALSE	None
TENT5C	3	-0.186832	0.00304804	3	-0.188133	0.000269768	-0.0181698	0.830337	0.958112	FALSE	None
SINHCAF	3	-0.7259	0.289704	3	-0.901431	0.368709	-0.223573	0.0284814	0.316112	FALSE	None
FAN1	3	-0.264018	0.010348	3	-0.250588	0.00452889	-0.0132677	0.88483	0.976402	FALSE	None
FANCA	3	-0.101257	0.0412675	3	-0.0629247	0.0699597	0.0021699	0.980071	0.993765	FALSE	None
FANCB	3	-0.0298224	0.00803666	3	-0.0427898	0.010785	-0.0589021	0.484919	0.828748	FALSE	None
FANCC	3	-0.0631246	0.00812549	3	-0.13879	0.0120693	-0.114363	0.32546	0.752207	FALSE	None
FANCD2	3	-0.314468	0.000276103	3	-0.218583	0.0228076	0.0815581	0.36005	0.774318	FALSE	None
FANCD2OS	3	-0.204299	0.0550715	3	0.0354656	0.054056	0.187712	0.0464031	0.388695	FALSE	None
FANCE	3	-0.223741	0.015689	3	-0.108492	0.000639544	0.0942398	0.372039	0.776438	FALSE	None
FANCF	3	-0.236163	0.0032745	3	-0.249856	0.0127447	-0.0114612	0.905855	0.97995	FALSE	None
FANCG	3	-0.200448	0.0274731	3	-0.0482567	0.071683	0.104727	0.265743	0.705892	FALSE	None
FANCI	3	-0.255854	0.0834975	3	-0.210477	0.0435394	0.0396664	0.70646	0.908948	FALSE	None
FANCL	3	-0.269079	0.0674474	3	-0.119258	0.0217329	0.123981	0.242816	0.69108	FALSE	None
FANCM	3	-0.0647393	0.104638	3	-0.177232	0.0971835	-0.162439	0.0721564	0.441529	FALSE	None
FASN	3	-0.216293	0.0735426	3	-0.192342	0.0958957	0.011597	0.90255	0.97995	FALSE	None
FASTKD1	3	-0.214891	0.00221069	3	-0.00236846	0.00217864	0.166896	0.125145	0.520151	FALSE	None
FBRSL1	3	-0.229536	0.0139139	3	-0.22349	0.0206828	-0.00882035	0.913064	0.97995	FALSE	None
FBXW7	3	0.398678	0.0113706	3	0.361414	0.0193902	-0.0961463	0.356339	0.772323	FALSE	None
FDX1	3	-0.310636	0.00648154	3	-0.421064	0.132909	-0.0963657	0.478014	0.828396	FALSE	None
FDX2	3	-0.357985	0.0569281	3	-0.197827	0.0216945	0.145222	0.190305	0.620506	FALSE	None
FECH	3	-0.161863	0.0705069	3	-0.225248	0.122473	-0.109225	0.248871	0.694325	FALSE	None
FEM1B	3	-0.135664	0.0188761	3	-0.196229	0.0215106	-0.0840307	0.503036	0.842231	FALSE	None
FEN1	3	-0.555329	0.026335	3	-0.530185	0.0245212	0.0322838	0.708469	0.9093	FALSE	None
FGFR1	3	-0.204418	0.00456263	3	-0.408398	3.3677e-05	-0.195624	0.0599875	0.417313	FALSE	None
FGFR2	3	-0.161894	0.0044742	3	-0.130697	0.0146921	0.0126691	0.888957	0.976982	FALSE	None
FGFR3	3	0.0979956	0.00425164	3	0.108677	0.00107957	-0.0750114	0.380944	0.778461	FALSE	None
FGFR4	3	-0.0429819	0.0527352	3	-0.380371	0.0297356	-0.327662	0.00486541	0.119855	TRUE	None
FH	3	0.00453159	0.0331519	3	0.00477734	0.00603939	-0.0570311	0.562175	0.863626	FALSE	None
FIBP	3	-0.212787	0.027656	3	-0.172366	0.091611	0.0226284	0.819192	0.953333	FALSE	None
FLCN	3	-0.306709	0.0305292	3	-0.590632	0.00308522	-0.272041	0.0453822	0.388695	FALSE	None
FLNB	3	-0.274843	0.0108483	3	-0.214911	0.0271837	0.0319396	0.742567	0.921367	FALSE	None
FOSL1	3	-0.890848	0.409258	3	-0.876679	0.633235	-0.0646047	0.549745	0.862295	FALSE	None
FOXA1	3	-0.126212	0.0225612	3	-0.50451	0.0195418	-0.373952	0.00233504	0.0714664	TRUE	None
FOXK1	3	-0.450778	0.00564503	3	-0.626889	0.0886295	-0.146101	0.277678	0.717276	FALSE	None
FOXM1	3	-0.991996	0.385982	3	-0.694977	0.0964094	0.266518	0.0465664	0.388695	FALSE	None
FPGS	3	-0.172226	0.0483017	3	0.069149	0.030757	0.194861	0.0639872	0.427994	FALSE	None
MRM2	3	-0.183215	0.00131832	3	-0.152376	0.0616342	-0.00464401	0.964453	0.992698	FALSE	None
FURIN	3	-0.311359	0.00134716	3	-0.608974	0.0844148	-0.255471	0.106681	0.500828	FALSE	None
FZD1	3	-0.145217	0.0162989	3	0.00497016	0.00304286	0.105954	0.280127	0.717579	FALSE	None
FZD10	3	-0.0311468	0.0603109	3	-0.0929141	0.0229167	-0.086215	0.351307	0.768009	FALSE	None
FZD2	3	-0.314278	0.0417237	3	-0.175036	0.0277262	0.129883	0.226889	0.664225	FALSE	None
FZD3	3	-0.0674114	0.00159808	3	0.00480988	0.0138044	0.0231525	0.811524	0.952327	FALSE	None
FZD4	3	-0.168205	0.0230107	3	-0.171827	0.0939063	-0.0220539	0.80413	0.947691	FALSE	None
FZD5	3	-0.14701	0.0211368	3	-0.0605986	0.0019634	0.0465163	0.582758	0.8695	FALSE	None
FZD6	3	-0.0711842	0.00321755	3	-0.0601527	0.0125422	-0.0175392	0.851437	0.963689	FALSE	None
FZD7	3	-0.0978703	0.0135387	3	-0.164167	0.0277367	-0.0725733	0.509425	0.842231	FALSE	None
FZD8	3	-0.256142	0.00951391	3	-0.237591	0.0696039	-0.00329185	0.971328	0.992859	FALSE	None
FZD9	3	-0.261088	0.0184828	3	5.45249e-06	0.039146	0.225225	0.0600107	0.417313	FALSE	None
G6PD	3	-0.450994	0.046215	3	-0.278196	0.0228758	0.177707	0.0860678	0.472668	FALSE	None
GANAB	3	-0.233425	0.0475227	3	-0.313982	0.0667177	-0.0995054	0.371728	0.776438	FALSE	None
GATA3	3	-0.0386186	0.000314538	3	-0.0692562	0.0429415	-0.0655191	0.493078	0.837348	FALSE	None
GATAD1	3	-0.324098	0.0299227	3	-0.237467	0.0429626	0.10809	0.28477	0.721527	FALSE	None
GCLC	3	-0.124337	0.0151018	3	-0.184026	0.0191471	-0.0625291	0.528543	0.854125	FALSE	None
GCLM	3	-0.190668	0.016518	3	-0.176457	0.00573933	0.00828511	0.936124	0.986936	FALSE	None
GCN1	3	-0.211392	0.0259303	3	-0.176552	0.109265	0.018757	0.865069	0.969679	FALSE	None
GCSH	3	-0.201368	0.0212925	3	-0.364966	0.0444723	-0.18201	0.0509785	0.402857	FALSE	None
GEMIN6	3	-0.198091	0.0284891	3	-0.0293792	0.0228283	0.116616	0.248746	0.694325	FALSE	None
GEN1	3	-0.134684	0.0191087	3	-0.113009	0.00994172	-0.0256938	0.777113	0.933275	FALSE	None
GGNBP2	3	-0.890733	0.0718722	3	-0.618888	0.0188155	0.278216	0.00664532	0.148646	TRUE	None
GHDC	3	-0.198314	0.0205436	3	-0.384726	0.00842296	-0.189401	0.0544373	0.410311	FALSE	None
GID8	3	-0.364515	0.00308549	3	-0.478413	0.167987	-0.0971328	0.435465	0.804489	FALSE	None
GJC1	3	-0.116975	0.0875004	3	-0.307574	0.0467566	-0.203859	0.0721869	0.441529	FALSE	None
GLS	3	-0.0535483	0.0014612	3	-0.0224604	0.0265125	0.00645551	0.948972	0.98829	FALSE	None
GNA13	3	-0.287368	0.0298722	3	-0.0923899	0.0107996	0.174975	0.0908582	0.472668	FALSE	None
GNL2	3	-1.50717	0.189414	3	-1.08962	0.0909075	0.318473	0.0120602	0.206455	TRUE	None
GNPTG	3	-0.134517	0.00257436	3	-0.228706	0.00695017	-0.102438	0.249544	0.694325	FALSE	None
GOT1	3	-0.0776835	0.00430978	3	0.0529402	0.0185143	0.0868077	0.362589	0.774318	FALSE	None
GOT2	3	-0.246521	0.00946204	3	-0.11985	0.040195	0.0827129	0.371517	0.776438	FALSE	None
GPX4	3	-2.277	0.379056	3	-1.00543	0.273666	1.1128	7.20387e-09	7.27591e-06	TRUE	Positive
GRHL2	3	-0.099793	0.00407149	3	-0.110241	0.00934696	-0.0494281	0.585853	0.8695	FALSE	None
GRK6	3	-0.0136196	0.0523051	3	-0.14032	0.0887102	-0.153578	0.0814167	0.461971	FALSE	None
GRSF1	3	-0.204837	0.0109289	3	-0.166552	0.0196121	0.0304841	0.751869	0.927896	FALSE	None
GSK3B	3	-0.12353	0.0127006	3	0.00908318	0.0252254	0.0777785	0.40371	0.790976	FALSE	None
GSPT1	3	-0.815604	0.175896	3	-0.763701	0.175455	0.0380733	0.725308	0.916065	FALSE	None
GSS	3	-0.0666945	0.0161991	3	-0.228085	0.0390001	-0.20302	0.0492711	0.400305	FALSE	None
GSTP1	3	-0.244617	0.0386713	3	-0.16001	0.0243828	0.0776854	0.546428	0.862295	FALSE	None
GTPBP3	3	-0.0480874	0.00190878	3	0.00361086	0.0409936	0.00560378	0.952755	0.989603	FALSE	None
HADHA	3	-0.221798	0.0083855	3	-0.26466	0.00448802	-0.0335984	0.727878	0.916065	FALSE	None
HAX1	3	-0.148397	0.114728	3	-0.112402	0.155663	-0.0112547	0.912385	0.97995	FALSE	None
HCN1	3	-0.155484	0.0206868	3	-0.0805839	0.0513268	0.0484406	0.599481	0.869937	FALSE	None
HDAC2	3	-0.113496	0.00407467	3	-0.113058	0.00207363	-0.0434865	0.615571	0.875621	FALSE	None
HDAC3	3	-1.05031	0.040809	3	-0.88426	0.0571839	0.128696	0.221227	0.654508	FALSE	None
HEATR3	3	-0.310503	0.049501	3	-0.392114	0.0250548	-0.0782738	0.504106	0.842231	FALSE	None
HECTD1	3	-0.677445	0.0195542	3	-0.645341	0.0134633	0.0614492	0.581346	0.8695	FALSE	None
HEXIM1	3	-0.13934	0.00445149	3	-0.0710987	0.0179659	0.0377306	0.685496	0.903685	FALSE	None
HIGD2A	3	-0.285569	0.00110628	3	-0.0561276	0.0065728	0.216337	0.0340862	0.340862	FALSE	None
H1-2	3	-0.22859	0.0119671	3	-0.215122	0.0101189	-0.0138943	0.888212	0.976982	FALSE	None
HK2	3	-0.423189	0.00896328	3	-0.339911	0.0348741	0.0871501	0.402685	0.790976	FALSE	None
HLTF	3	-0.109529	0.00969611	3	0.012898	0.0494217	0.0808883	0.394597	0.789166	FALSE	None
ARHGAP45	3	-0.132199	0.0100965	3	-0.0681816	0.0314284	0.0193591	0.822316	0.953466	FALSE	None
HNRNPD	3	-0.283736	0.0159681	3	-0.0857757	0.0205784	0.172664	0.112616	0.510424	FALSE	None
HNRNPK	3	-2.1197	0.353574	3	-2.08946	0.0183334	-0.198569	0.249182	0.694325	FALSE	None
UBE2A	6	-0.444907	0.108296	6	-0.401455	0.0114573	0.0608284	0.525217	0.853674	FALSE	None
UBE2E1	3	-0.0714297	0.0673593	3	-0.165919	0.0284544	-0.124533	0.198656	0.632762	FALSE	None
RIDA	3	-0.277278	0.0716865	3	-0.107887	0.0335602	0.142065	0.178551	0.605155	FALSE	None
HSD17B4	3	-0.163308	0.0197488	3	-0.0625225	0.0240271	0.0631725	0.53465	0.855779	FALSE	None
HSD17B6	3	-0.128795	0.00219667	3	-0.0997102	0.026014	-0.00177527	0.98561	0.993803	FALSE	None
HSF1	3	0.0920666	0.0138496	3	-0.208335	0.0465138	-0.328937	0.00126995	0.0484942	TRUE	None
HTRA2	3	-0.157671	0.0252468	3	-0.365608	0.0523651	-0.195293	0.043984	0.388695	FALSE	None
HUS1	3	-0.411585	0.0791296	3	-0.409668	0.0849794	0.00335786	0.971296	0.992859	FALSE	None
MRPL58	3	-0.22175	0.0360225	3	-0.234472	0.0214044	-0.0403663	0.686127	0.903685	FALSE	None
ID4	3	0.0129036	0.085528	3	-0.167731	0.0089347	-0.204631	0.0960511	0.478599	FALSE	None
IDH1	3	-0.132896	0.0121413	3	0.0606512	0.0180514	0.133766	0.156875	0.570731	FALSE	None
IDH2	3	-0.0913823	0.0141562	3	-0.247328	0.0061471	-0.16797	0.109568	0.503016	FALSE	None
IDH3A	3	-0.0329186	0.00994338	3	-0.238592	0.013124	-0.237492	0.0417447	0.388695	FALSE	None
IER3IP1	3	-0.0739908	0.01004	3	-0.0560331	0.0115855	-0.00947651	0.924682	0.980649	FALSE	None
IMPDH2	3	-0.430083	0.0273257	3	-0.265065	0.0245027	0.155314	0.16638	0.580466	FALSE	None
ING2	3	0.187492	0.00285317	3	0.0595185	3.88252e-05	-0.203304	0.0445437	0.388695	FALSE	None
ING5	3	-0.126131	0.0517946	3	-0.2263	0.117052	-0.119631	0.296346	0.725944	FALSE	None
INO80B	3	-0.393102	0.0256661	3	-0.518979	0.0852034	-0.138207	0.27489	0.713725	FALSE	None
INO80D	3	-0.31161	0.0135607	3	-0.231831	0.0260983	0.0845369	0.423725	0.798437	FALSE	None
INPP4A	3	-0.370251	0.138277	3	-0.371409	0.0246658	0.0217987	0.842551	0.961556	FALSE	None
INPPL1	3	-0.355211	0.0644403	3	-0.132959	0.0283247	0.21147	0.120324	0.513667	FALSE	None
INSR	3	-0.0671804	0.0126239	3	-0.00883425	0.0121117	-0.0123365	0.900139	0.97995	FALSE	None
IQCH	3	-0.252679	0.0296152	3	-0.249768	0.0153776	-0.010248	0.915809	0.97995	FALSE	None
IREB2	3	0.088965	0.0278591	3	0.0465019	0.0127463	-0.108763	0.335762	0.758658	FALSE	None
IRF2BP1	3	-0.0603379	0.0280469	3	-0.0379143	0.0238295	-0.0403839	0.683095	0.903685	FALSE	None
IRS2	3	-0.230618	0.0280985	3	-0.208232	0.0199819	0.00952164	0.930875	0.982428	FALSE	None
ITGA1	3	-0.353308	0.0394821	3	-0.226266	0.00641491	0.107671	0.263047	0.704714	FALSE	None
ITGA2	3	-0.0863024	0.00897649	3	-0.0489706	0.0126217	-0.0159543	0.866257	0.969679	FALSE	None
ITGA3	3	-0.191829	0.00468753	3	-0.231667	0.0172472	-0.0561214	0.622505	0.876229	FALSE	None
ITGA4	3	0.0361153	0.0189849	3	0.139257	0.00676264	0.0321756	0.723896	0.916065	FALSE	None
ITGA5	3	-0.44328	0.0103553	3	-0.294207	0.0164657	0.15961	0.0681621	0.438495	FALSE	None
ITGA6	3	-0.111411	0.00114363	3	-0.0647124	0.00219216	0.00887849	0.925406	0.980649	FALSE	None
ITGA7	3	-0.189243	0.0025499	3	-0.12432	0.0108456	0.0470809	0.598724	0.869937	FALSE	None
ITGA9	3	-0.0563312	0.0203725	3	-0.108448	0.0122682	-0.0910045	0.339277	0.759801	FALSE	None
ITGAE	3	-0.123197	0.021337	3	-0.00680521	0.0161588	0.0592752	0.528112	0.854125	FALSE	None
ITGAV	3	-1.6774	2.03011	3	-1.12894	1.02656	0.375082	0.0574496	0.417313	FALSE	None
ITGB1	3	0.152078	0.0192761	3	0.305509	0.0136501	0.0753906	0.395037	0.789166	FALSE	None
ITGB4	3	-0.209246	0.0284872	3	-0.161077	0.0476428	0.0448276	0.67514	0.903685	FALSE	None
ITGB5	3	-2.85964	0.275667	3	-2.44898	0.288828	0.150994	0.319772	0.749351	FALSE	None
JAK2	3	-0.00277468	0.0233017	3	0.0909156	0.0647957	0.0220918	0.848622	0.963467	FALSE	None
JTB	3	-0.860484	0.024242	3	-0.432924	0.0438209	0.442484	0.000199028	0.015463	TRUE	None
KAT6A	3	0.0248907	0.0168344	3	-0.00672429	0.0228337	-0.0811801	0.382018	0.778461	FALSE	None
KAT7	3	-0.141265	0.121442	3	-0.167117	0.0028087	-0.0434295	0.709434	0.9093	FALSE	None
KCTD5	3	0.423844	0.0485685	3	0.349956	0.0507202	-0.12699	0.161054	0.574548	FALSE	None
KDELR3	3	-0.271773	0.00727259	3	-0.0812441	0.014168	0.171334	0.0680427	0.438495	FALSE	None
KDM5A	3	0.148178	0.0213484	3	0.16588	0.0190011	-0.0529886	0.562891	0.863626	FALSE	None
KDM5C	3	-0.843356	0.0615151	3	-0.69128	0.0202298	0.152984	0.147991	0.559818	FALSE	None
KDM6A	3	-0.0134505	0.0244045	3	0.00760264	0.0227714	-0.0492211	0.605482	0.872085	FALSE	None
KEAP1	3	0.813508	0.0113291	3	0.677513	0.00553023	-0.0922151	0.289051	0.721527	FALSE	None
KIAA0100	3	-0.267188	0.0424404	3	-0.26091	0.038258	0.00464503	0.96171	0.992698	FALSE	None
KHDC4	3	-0.314913	0.00255535	3	-0.0604496	0.0192001	0.224724	0.0297051	0.325783	FALSE	None
RIC1	3	-0.100948	0.016676	3	0.0942272	0.033791	0.141221	0.0938623	0.474004	FALSE	None
KIF14	3	-0.303806	0.00586523	3	-0.346686	0.0232626	-0.0376652	0.741043	0.920607	FALSE	None
KIF18B	3	-0.22137	0.0381472	3	-0.259354	0.0402082	-0.0370586	0.681482	0.903685	FALSE	None
KIF4A	3	-0.116549	0.00647245	3	-0.173611	0.0662888	-0.0925794	0.390231	0.786693	FALSE	None
KIRREL1	3	0.793964	0.00150346	3	0.747277	0.0258775	0.000649962	0.99433	0.997292	FALSE	None
KLF10	3	-0.0279006	0.0220798	3	-0.207517	0.106694	-0.197441	0.0862959	0.472668	FALSE	None
KLF4	3	-0.170716	0.0383595	3	-0.0524448	0.00330217	0.0803803	0.530517	0.855779	FALSE	None
KLF5	3	-0.28352	0.00524036	3	-0.272673	0.0389539	0.0248149	0.778873	0.93363	FALSE	None
KMT2A	3	-0.581046	0.0771881	3	-0.584044	0.0122982	0.0152975	0.898939	0.97995	FALSE	None
KMT2C	3	-0.110704	0.044707	3	-0.0871977	0.00457116	-0.00670442	0.941244	0.988208	FALSE	None
KMT2D	3	-0.113748	0.00231243	3	-0.144157	0.0807925	-0.0453243	0.696095	0.904029	FALSE	None
KPNA4	3	-0.38416	0.0161212	3	-0.221574	0.0226935	0.167289	0.0934362	0.474004	FALSE	None
KRAS	3	-3.4949	0.532315	3	-3.20627	2.0443	0.0759167	0.811969	0.952327	FALSE	None
L3MBTL3	3	0.229049	0.0624368	3	0.252447	0.0304531	-0.0336151	0.7247	0.916065	FALSE	None
LAMTOR5	3	-1.24186	0.0139179	3	-1.19467	0.174339	-0.0376605	0.791938	0.942117	FALSE	None
LARP7	3	0.0161093	0.0494778	3	0.114842	0.0786726	0.0381417	0.691632	0.903685	FALSE	None
LCMT1	3	0.0655611	0.0104928	3	0.0502163	0.0186203	-0.0800833	0.379696	0.778461	FALSE	None
LDHA	3	-0.192242	0.0171792	3	-0.216063	0.0393058	-0.0364467	0.730899	0.916065	FALSE	None
LDHB	3	-0.127206	0.0125614	3	0.0435318	0.0156345	0.119408	0.167775	0.580466	FALSE	None
LGR4	3	-0.0659422	0.00584005	3	-0.163381	0.0164501	-0.134627	0.149619	0.561578	FALSE	None
LIG1	3	-0.210261	0.0382819	3	-0.151237	0.0263116	0.0463755	0.604766	0.872085	FALSE	None
LIG3	3	-0.0386739	0.00941422	3	-0.0395339	0.0211753	-0.0606683	0.55665	0.862295	FALSE	None
LIG4	3	-0.0597898	0.0314872	3	-0.0226296	0.0600035	-0.0184934	0.838097	0.959198	FALSE	None
LIMS1	3	-1.20389	0.236149	3	-0.959916	0.182324	0.185571	0.0433218	0.388695	FALSE	None
LIN28B	3	-0.296712	0.0894745	3	-0.428827	0.140978	-0.118979	0.257898	0.701201	FALSE	None
LIPT1	3	-0.0827644	0.00863669	3	0.170467	0.0148695	0.181031	0.0813812	0.461971	FALSE	None
LMNA	3	-0.0153057	0.0130791	3	-0.0137148	0.167138	-0.0546577	0.591688	0.869937	FALSE	None
LMO2	3	-0.112352	0.0290059	3	-0.122314	0.0310183	-0.0333648	0.730365	0.916065	FALSE	None
LRP5	3	-0.382366	0.0212562	3	-0.438115	0.032263	-0.0282151	0.769125	0.929663	FALSE	None
LRP6	3	-0.411284	0.0127614	3	-0.462419	0.0919728	-0.0219874	0.830109	0.958112	FALSE	None
LRRC45	3	-0.0875571	0.042033	3	-0.0824118	0.0681058	-0.0502873	0.571551	0.866767	FALSE	None
LRRC49	3	-0.130174	0.0260455	3	-0.271958	0.0585244	-0.146901	0.107635	0.500828	FALSE	None
LYRM4	3	-1.24642	0.0549919	3	-1.02796	0.107767	0.134917	0.256262	0.699526	FALSE	None
MAD1L1	3	-0.262197	0.00820192	3	-0.197223	0.0561326	0.0347624	0.691172	0.903685	FALSE	None
MAD2L2	3	-0.500939	0.0307225	3	-0.44935	0.177813	0.0710805	0.539458	0.858035	FALSE	None
MANF	3	-0.309685	0.0570809	3	-0.2144	0.110877	0.0760679	0.44344	0.808437	FALSE	None
MAP2K1	3	-0.155599	0.0220689	3	-0.460922	0.0345842	-0.307325	0.00165876	0.0567232	TRUE	None
MAP2K4	3	-0.0452407	0.0115743	3	-0.0812885	0.0678476	-0.0731922	0.454554	0.821136	FALSE	None
MAP2K5	3	-0.532146	0.0593014	3	-0.616413	0.0769609	-0.0713112	0.411357	0.795256	FALSE	None
MAP3K1	3	-0.0812692	0.0765285	3	-0.135527	0.00528583	-0.0925617	0.365182	0.775704	FALSE	None
MAP4K4	3	0.515017	0.0577723	3	0.616006	0.0237574	0.104612	0.289225	0.721527	FALSE	None
MAPK1	3	-0.255851	0.0137016	3	-0.2965	0.0410433	-0.0588303	0.573585	0.86812	FALSE	None
MARCHF5	3	-0.0588721	0.0141191	3	-0.13492	0.0234872	-0.0901365	0.345592	0.762685	FALSE	None
MARK2	3	-1.46398	0.0112373	3	-1.052	0.0235263	0.317294	0.0437202	0.388695	FALSE	None
MAT2B	3	-0.0660627	0.0594751	3	-0.0537877	0.000215473	-0.00908043	0.926276	0.980649	FALSE	None
MATR3	3	-0.455978	0.0125421	3	-0.422964	0.0278478	0.0420506	0.647336	0.885921	FALSE	None
MBNL1	3	-0.578649	0.0406939	3	-0.457517	0.00913339	0.143834	0.224515	0.661109	FALSE	None
MBTD1	3	-0.385055	0.0158349	3	-0.50879	0.105543	-0.0979898	0.437565	0.804489	FALSE	None
MCCC2	3	-0.209566	0.0421188	3	-0.165236	0.0243081	0.0459834	0.702146	0.906864	FALSE	None
MCL1	3	0.095381	0.0290749	3	0.0626484	0.0163086	-0.0903061	0.381797	0.778461	FALSE	None
MCM10	3	-1.44049	0.666761	3	-1.29719	0.959306	0.0180695	0.912651	0.97995	FALSE	None
MCM2	3	-1.7022	0.170991	3	-1.52967	0.348794	0.0152704	0.900413	0.97995	FALSE	None
MCM3	3	-0.984197	0.457542	3	-1.05544	0.202939	-0.10967	0.372259	0.776438	FALSE	None
MCM4	3	-1.28001	0.0858152	3	-1.13413	0.0374651	0.0589549	0.606276	0.872085	FALSE	None
MCM5	3	-1.22917	0.244535	3	-0.90216	0.0572429	0.25894	0.0331237	0.33455	FALSE	None
MCM6	3	-1.76756	0.301692	3	-1.49401	0.413253	0.129282	0.416656	0.798437	FALSE	None
MCM7	3	-0.776996	0.32324	3	-0.53071	0.309956	0.211201	0.062173	0.424289	FALSE	None
MCM9	3	-0.207706	0.0877402	3	-0.243601	0.0714788	-0.0579409	0.5638	0.863626	FALSE	None
MDH2	3	-0.00551675	0.0193498	3	-0.0712547	0.143747	-0.105532	0.265789	0.705892	FALSE	None
MDK	3	-0.038023	0.055598	3	-0.0642692	0.00763622	-0.0691436	0.535554	0.855869	FALSE	None
MDM2	3	0.00541079	0.00653668	3	-0.097157	0.0296455	-0.152831	0.258264	0.701201	FALSE	None
MDM4	3	-0.0682317	0.00329821	3	-0.0341529	0.00441405	-0.00244889	0.976991	0.993717	FALSE	None
MEAF6	3	-0.772585	0.00484097	3	-0.87547	0.0390999	-0.117893	0.395857	0.789166	FALSE	None
MED1	3	-0.971988	0.0914958	3	-0.723908	0.0429255	0.226076	0.0238603	0.290348	TRUE	None
MED12	3	-0.809712	0.286051	3	-1.37812	0.213111	-0.643529	0.000219548	0.0158388	TRUE	None
MED13L	3	-0.272372	0.0785024	3	-0.363294	0.0956539	-0.0820955	0.415794	0.798387	FALSE	None
MED16	3	-0.145222	0.0087328	3	0.0667604	0.00879233	0.172274	0.0706057	0.441529	FALSE	None
MED23	3	-0.470139	0.0143944	3	-0.49718	0.123149	-0.00788321	0.946064	0.98829	FALSE	None
MED24	3	-0.850017	0.096561	3	-0.719004	0.00329394	0.148027	0.254141	0.699158	FALSE	None
MED25	3	-0.25804	0.0542644	3	-0.156677	0.0209974	0.0778708	0.435191	0.804489	FALSE	None
MEN1	3	-0.617919	0.0672368	3	-0.542277	0.209183	0.0616552	0.646031	0.885334	FALSE	None
MET	3	-0.203061	0.00221547	3	-0.0837418	0.0130688	0.102485	0.291006	0.723931	FALSE	None
MFSD9	3	-0.155509	0.0445903	3	-0.085219	0.0374152	0.0348003	0.716487	0.912549	FALSE	None
MGA	3	-0.16691	0.00296287	3	-0.149765	0.0012293	0.00443786	0.963517	0.992698	FALSE	None
MGAT1	3	-0.303691	0.0921967	3	-0.263798	0.13995	0.0393669	0.700795	0.906278	FALSE	None
MGAT5	3	-0.0904611	0.0328391	3	-0.252994	0.0284614	-0.179595	0.136866	0.544231	FALSE	None
OGA	3	0.0745177	0.0175445	3	-0.0549781	0.0101226	-0.185872	0.0692432	0.441529	FALSE	None
MGMT	3	-0.0492391	0.0474002	3	-0.115755	0.0151276	-0.0832332	0.497052	0.838571	FALSE	None
MIB1	3	-0.254799	0.0313357	3	-0.119341	0.0149779	0.131385	0.161556	0.574548	FALSE	None
MITF	3	-0.189047	0.0170345	3	-0.261891	0.0211449	-0.0719872	0.484126	0.828748	FALSE	None
MLH1	3	-0.260324	0.0385683	3	-0.382575	0.0640733	-0.119178	0.197815	0.632762	FALSE	None
MLH3	3	-0.0608598	0.00396989	3	-0.108981	0.0286663	-0.0560147	0.589667	0.869937	FALSE	None
MAP3K20	3	-0.0667472	0.012644	3	0.0122204	0.0221031	0.025072	0.767208	0.929663	FALSE	None
MMGT1	3	-0.376567	0.00358721	3	-0.246039	0.0960829	0.0986039	0.295418	0.725944	FALSE	None
MNT	3	-0.0340972	0.00864343	3	-0.0632873	0.0301748	-0.0734106	0.465852	0.821136	FALSE	None
MOGS	3	-0.0690311	0.0228432	3	-0.0901751	0.00820594	-0.0506818	0.613838	0.875621	FALSE	None
MORC2	3	-0.172837	0.190387	3	-0.0706821	0.0331443	0.066115	0.559951	0.863626	FALSE	None
MPC1	3	-0.109041	0.00212043	3	-0.113276	0.019711	-0.0356618	0.711538	0.910131	FALSE	None
MPHOSPH8	3	-0.213907	0.0211723	3	-0.0355575	0.0219802	0.135383	0.259559	0.701824	FALSE	None
MRE11	3	-0.324136	0.0267193	3	-0.0911021	0.113526	0.228273	0.021025	0.27675	TRUE	None
MRPL28	3	-0.122288	0.029824	3	0.0151148	0.0140065	0.0886465	0.33524	0.758658	FALSE	None
MRPL41	3	-0.285736	0.0211067	3	-0.353103	0.00716022	-0.0720198	0.518085	0.847747	FALSE	None
MRPS21	3	-0.134757	0.0288803	3	-0.460513	0.0611875	-0.305692	0.00284627	0.0845509	TRUE	None
MSH2	3	-0.351969	0.0377258	3	-0.115887	0.052548	0.232531	0.0409485	0.388695	FALSE	None
MSH3	3	-0.159755	0.0475043	3	-0.1769	0.210962	-0.0398639	0.669313	0.902432	FALSE	None
MSH6	3	-0.382409	0.0235416	3	-0.326227	0.0891966	0.0637461	0.555607	0.862295	FALSE	None
MTF2	3	-0.607245	0.508156	3	-0.638236	0.331525	-0.0708492	0.464471	0.821136	FALSE	None
MTFMT	3	-0.029874	0.0156692	3	-0.250207	0.0555599	-0.256363	0.0100342	0.177798	TRUE	None
MTG1	3	-0.0796957	0.0439473	3	-0.0825574	0.015333	-0.0486468	0.597527	0.869937	FALSE	None
MTHFD1L	3	0.0637251	0.00281545	3	-0.01417	0.136039	-0.107714	0.357943	0.772667	FALSE	None
MTX1	3	-0.227611	0.0170518	3	-0.198831	0.0179034	0.0211992	0.83659	0.959088	FALSE	None
MUS81	3	-0.365613	0.00450989	3	-0.471218	0.0475837	-0.0706287	0.434234	0.804489	FALSE	None
MYD88	3	-0.141659	0.019217	3	-0.114653	0.00934842	-0.017848	0.872855	0.970908	FALSE	None
MYH9	3	-1.06072	0.0750729	3	-0.423726	0.0829191	0.632443	9.28734e-07	0.000312674	TRUE	None
MYL6	3	-0.243063	0.0029134	3	-0.13279	0.00191123	0.114322	0.230987	0.670393	FALSE	None
MZT2B	3	-0.399123	0.0553331	3	-0.425891	0.0101252	-0.00420352	0.971998	0.992859	FALSE	None
NACC1	3	-0.250751	0.0249871	3	-0.327986	0.00401842	-0.0807539	0.382823	0.778461	FALSE	None
NADK	3	-0.346612	0.112825	3	-0.286174	0.117658	0.0524925	0.583468	0.8695	FALSE	None
NAGK	3	-0.037277	0.0217026	3	0.0111107	0.0172477	-0.0100142	0.916884	0.97995	FALSE	None
NAMPT	3	-0.0397274	0.0463837	3	-0.172095	0.0109513	-0.164042	0.120738	0.513667	FALSE	None
NBN	3	-0.0799724	0.011291	3	-0.112994	0.0562071	-0.0549376	0.599247	0.869937	FALSE	None
NCOR1	3	-0.0237644	0.000898104	3	0.0737618	0.00815278	0.0200492	0.833232	0.958112	FALSE	None
NCSTN	3	-0.570046	0.00860416	3	-0.398713	0.156887	0.181113	0.188992	0.620506	FALSE	None
NDUFA11	3	-0.0211031	0.00701535	3	-0.0262454	0.0203537	-0.0698526	0.467763	0.823067	FALSE	None
NDUFAF3	3	-0.327622	0.0578222	3	-0.289366	0.000861858	0.0477563	0.681493	0.903685	FALSE	None
NDUFAF6	3	-0.128133	0.0114143	3	-0.00878775	0.0815473	0.0732926	0.533578	0.855779	FALSE	None
NDUFB10	3	-0.152637	0.0265346	3	-0.139496	0.0357785	-0.0200844	0.825918	0.955529	FALSE	None
NDUFB11	3	-0.307787	0.0173643	3	-0.266696	0.0208612	0.0372906	0.734396	0.916065	FALSE	None
NDUFC1	3	-0.116478	0.0352117	3	-0.0339891	0.0215967	0.0249564	0.802198	0.946519	FALSE	None
NDUFS6	3	-0.0604344	0.0173449	3	-0.0876643	0.0167013	-0.043494	0.642437	0.884008	FALSE	None
NEIL1	3	-0.54244	0.432509	3	-0.763921	0.449348	-0.261579	0.00735874	0.148646	TRUE	None
NELFE	3	-0.236835	0.010934	3	-0.442778	0.0713604	-0.186566	0.0905861	0.472668	FALSE	None
NEMF	3	-0.452692	0.0164274	3	-0.386977	0.0272687	0.0765172	0.47866	0.828396	FALSE	None
NEO1	3	0.0331904	0.0950637	3	-0.351886	0.140265	-0.406031	0.00198358	0.0646264	TRUE	None
NF1	3	-0.227652	0.0337059	3	-0.398284	0.029095	-0.185407	0.0523754	0.40381	FALSE	None
NF2	3	1.21596	0.00407959	3	0.837875	0.00356633	-0.201857	0.0312319	0.325783	FALSE	None
NFE2L1	3	0.104183	0.000575363	3	-1.3826	0.757523	-1.52178	5.41299e-08	2.73356e-05	TRUE	Negative
NFE2L2	3	-0.104429	0.0279485	3	0.0599309	0.000184032	0.115791	0.312145	0.740062	FALSE	None
NGLY1	3	-0.130692	0.0451182	3	-0.696264	0.0589296	-0.552309	1.79498e-05	0.0025824	TRUE	None
NHEJ1	3	-0.16955	0.00068073	3	-0.186331	0.00465958	-0.00475023	0.959652	0.992698	FALSE	None
NHLRC2	3	-0.111946	0.00537865	3	-0.11984	0.00964445	-0.0347579	0.709183	0.9093	FALSE	None
NKX2-1	3	0.0738769	0.0059311	3	0.0638644	0.0239039	-0.0869821	0.403387	0.790976	FALSE	None
NKX3-1	3	-0.0820715	0.0565949	3	-0.0322928	0.0431011	0.0135029	0.884236	0.976402	FALSE	None
NME6	3	-0.0714369	0.00989563	3	-0.234842	0.00973583	-0.180446	0.0654793	0.433668	FALSE	None
NONO	3	-0.393879	0.0146344	3	-0.318228	0.0233807	0.0835658	0.412546	0.795256	FALSE	None
NOP16	3	-1.4458	0.00183486	3	-1.09418	0.00358735	0.248963	0.0191934	0.273032	TRUE	None
NOTCH1	3	-0.0138586	0.00263037	3	-0.149871	0.00555185	-0.187647	0.0978922	0.478599	FALSE	None
NOTCH2	3	-0.134101	0.0476825	3	-0.27201	0.0259259	-0.138838	0.182085	0.610984	FALSE	None
NOTCH3	3	-0.0568655	0.0783256	3	0.0169057	0.0426066	0.0429706	0.639483	0.881784	FALSE	None
NPRL2	3	-0.105219	0.0011387	3	-0.181747	0.0576806	-0.0922401	0.306251	0.73297	FALSE	None
NRAS	3	-0.179734	0.00687078	3	-0.231127	0.00207046	-0.0409296	0.691573	0.903685	FALSE	None
NSD1	3	-0.11488	0.00118472	3	-0.124773	0.00390309	-0.048918	0.636632	0.880286	FALSE	None
NSUN2	3	-0.18313	0.0131996	3	-0.0788642	0.0507096	0.0628481	0.455609	0.821136	FALSE	None
NSUN3	3	-0.0924622	0.0188485	3	-0.257602	0.0204359	-0.15918	0.10619	0.500828	FALSE	None
NUDT16L1	3	-0.193858	0.00416322	3	-0.237664	0.0517166	-0.0514045	0.653013	0.888872	FALSE	None
NUDT19	3	-0.500938	0.309445	3	-0.0747052	0.357938	0.373002	0.000607245	0.0339367	TRUE	None
NUFIP2	3	-0.37895	0.0508361	3	-0.142082	0.0087289	0.251734	0.0116143	0.202249	TRUE	None
NXT1	3	0.353161	0.00957059	3	0.341869	0.012844	-0.0762294	0.405669	0.790976	FALSE	None
OLA1	3	-0.44146	0.0048146	3	-0.335248	0.0221589	0.109034	0.283787	0.721527	FALSE	None
ORC1	3	-0.770827	0.10134	3	-0.745513	0.150973	-0.00517672	0.965178	0.992698	FALSE	None
ORC2	3	-0.730235	0.119191	3	-0.506727	0.0103229	0.249358	0.0221948	0.27675	TRUE	None
OTUB1	3	-0.453371	0.0391273	3	-0.374609	0.0340551	0.092837	0.320861	0.750162	FALSE	None
OTUD5	3	0.281391	0.0500242	3	0.248351	0.0465293	-0.0981699	0.289325	0.721527	FALSE	None
PAIP1	3	-0.342536	0.0644389	3	-0.505709	0.117701	-0.159911	0.0770915	0.450072	FALSE	None
PALB2	3	-0.236979	0.029211	3	-0.188804	0.000982457	0.0373692	0.697006	0.904029	FALSE	None
APLF	3	-0.225694	0.0127522	3	-0.0924064	0.00312635	0.10494	0.262342	0.704695	FALSE	None
PAPSS1	3	-0.0248066	0.00266609	3	-0.051891	0.00542442	-0.0811426	0.376126	0.778461	FALSE	None
PARP1	3	-0.163934	0.081628	3	-0.0476607	0.212335	0.0636493	0.52622	0.853674	FALSE	None
PARP10	3	-0.129921	0.0281395	3	-0.0636664	0.0184789	0.0296722	0.729557	0.916065	FALSE	None
PARP11	3	-0.198589	0.0142884	3	-0.277145	0.0444524	-0.0978345	0.334762	0.758658	FALSE	None
PARP12	3	0.00382298	0.0156021	3	0.116562	0.0283127	0.0382619	0.698161	0.904029	FALSE	None
PARP14	3	-0.072161	0.00310398	3	-0.0877107	0.00317074	-0.0793838	0.358028	0.772667	FALSE	None
PARP15	3	-0.300266	0.00169329	3	-0.285768	0.0448013	0.00662344	0.942522	0.98829	FALSE	None
PARP16	3	0.0620801	0.0346199	3	-0.0396592	0.059593	-0.165417	0.0574731	0.417313	FALSE	None
PARP2	3	-0.364694	0.0163514	3	-0.253197	0.0196302	0.131412	0.198956	0.632762	FALSE	None
PARP3	3	-0.371049	0.0146419	3	-0.0888258	0.00499329	0.254543	0.00704722	0.148646	TRUE	None
PARP4	3	-0.113742	0.00227544	3	-0.0944302	0.0327988	-0.0289524	0.76154	0.927896	FALSE	None
PARP6	3	0.00843213	0.0136541	3	-0.186985	0.0149802	-0.215932	0.0267788	0.303894	FALSE	None
PARP8	3	-0.198195	0.0142155	3	-0.181733	0.0100373	-0.0031266	0.976584	0.993717	FALSE	None
PARP9	3	0.0250966	0.0107494	3	-0.0993756	0.139695	-0.165788	0.117989	0.510424	FALSE	None
PAWR	3	0.132319	0.0201885	3	0.103081	0.00683189	-0.0990979	0.314686	0.74434	FALSE	None
PAXIP1	3	0.211277	0.00580784	3	0.465919	0.0554485	0.19452	0.0520931	0.40381	FALSE	None
PBDC1	3	-0.173245	0.0621648	3	-0.276699	0.0112805	-0.093685	0.420831	0.798437	FALSE	None
PBRM1	3	-0.546812	0.0180045	3	-0.330828	0.0232676	0.205444	0.058708	0.417313	FALSE	None
PCBP1	3	-0.0401476	0.00165189	3	-0.0975362	0.000420915	-0.103871	0.281268	0.717579	FALSE	None
PCGF3	3	-0.0233294	0.0207021	3	-0.0764422	0.0195909	-0.0890993	0.484941	0.828748	FALSE	None
PDCD10	3	0.613249	0.016793	3	0.643972	0.0070314	0.030216	0.732316	0.916065	FALSE	None
PDCD5	3	-0.560577	0.0170142	3	-0.410906	0.00539226	0.174208	0.0723418	0.441529	FALSE	None
PDCD6IP	3	-0.107325	0.0150301	3	-0.180338	0.0507527	-0.0888812	0.323465	0.752165	FALSE	None
PDCL	3	-1.36533	0.00153286	3	-0.908298	0.0233988	0.388104	0.017062	0.251011	TRUE	None
PDGFRA	3	-0.177999	0.0140977	3	-0.100648	0.00335158	0.0633705	0.473195	0.825435	FALSE	None
PDHA1	3	-0.08791	0.00782263	3	-0.256578	0.00231222	-0.174891	0.0575058	0.417313	FALSE	None
PDK1	3	-0.13689	0.0489854	3	-0.0885876	0.0618429	0.0197453	0.848669	0.963467	FALSE	None
PDS5A	3	-0.488604	0.00168001	3	-0.410957	0.0334725	0.0792695	0.408163	0.792779	FALSE	None
PDSS1	3	-0.260798	0.0377681	3	-0.24217	0.0429387	0.00907695	0.922959	0.980649	FALSE	None
PELO	3	-0.527334	0.00275646	3	-0.290584	0.0727168	0.24274	0.0221293	0.27675	TRUE	None
PFKM	3	-0.216266	0.0464587	3	-0.222005	0.0470748	-0.0134039	0.871016	0.970834	FALSE	None
PGAP2	3	-0.241826	0.071073	3	-0.215545	0.024685	0.000114375	0.999211	0.999211	FALSE	None
PGLS	3	-0.0886092	0.0404528	3	-0.0140638	0.0136543	0.0226912	0.814947	0.952327	FALSE	None
PGM2	3	-0.09545	0.00625464	3	0.141168	0.0159337	0.169684	0.11599	0.510424	FALSE	None
PGP	3	-0.14676	0.0463292	3	-0.0208339	0.00175906	0.0715763	0.509508	0.842231	FALSE	None
PHF12	3	-0.202438	0.0159704	3	-0.104591	0.0100924	0.0627992	0.503766	0.842231	FALSE	None
PHGDH	3	-0.123433	0.00663375	3	-0.132215	0.10121	-0.0316675	0.733288	0.916065	FALSE	None
PHLPP1	3	0.092437	0.0312274	3	-0.0170397	0.0135254	-0.160037	0.113538	0.510424	FALSE	None
PIAS1	3	-0.0261188	0.0144567	3	-0.330828	0.0984791	-0.319763	0.00367934	0.100436	TRUE	None
PIAS2	3	0.0974645	0.0056738	3	0.0545472	0.0133263	-0.123429	0.180346	0.609194	FALSE	None
PIAS3	3	-0.0389812	0.00539443	3	0.01353	0.00560744	0.011882	0.886495	0.976402	FALSE	None
PIAS4	3	0.0467848	0.0330259	3	0.143975	0.12832	0.0495237	0.590455	0.869937	FALSE	None
PICALM	3	-0.213666	0.00337546	3	-0.164347	0.0467658	0.0395438	0.694675	0.904029	FALSE	None
PIGB	3	-0.112743	0.00287689	3	-0.310759	0.0232881	-0.196167	0.0857722	0.472668	FALSE	None
PIGF	3	-0.0578276	0.0556323	3	-0.143222	0.00945712	-0.114478	0.229227	0.667201	FALSE	None
PIH1D1	3	-0.282436	0.0233703	3	-0.262677	0.0228282	0.0136535	0.903832	0.97995	FALSE	None
PIK3CA	3	-0.232897	0.0799618	3	-0.0483927	0.0786503	0.145472	0.132425	0.532866	FALSE	None
PIK3R1	3	-0.0487552	0.0080179	3	-0.0245242	0.0105628	-0.0374179	0.688194	0.903685	FALSE	None
PIN1	3	-0.058742	0.0128107	3	0.0227649	0.0045486	0.0206791	0.82319	0.953466	FALSE	None
PITRM1	3	-0.0380367	0.010813	3	0.0577	0.0248059	0.0351358	0.670123	0.902432	FALSE	None
PKP2	3	-0.308264	0.063224	3	-0.407229	0.0625522	-0.0942625	0.345851	0.762685	FALSE	None
PLAA	3	-0.167063	0.00830945	3	-0.0362911	0.0695136	0.0840954	0.405339	0.790976	FALSE	None
PMAIP1	3	0.0425301	0.0117222	3	0.125811	0.00682961	0.0221953	0.797776	0.946519	FALSE	None
PMM2	3	-0.0438708	0.0199824	3	-0.143479	0.0147975	-0.123431	0.21373	0.649133	FALSE	None
PMS1	3	-0.135809	0.00551675	3	-0.0532634	0.00215453	0.065374	0.439561	0.80573	FALSE	None
PMS2	3	-0.205593	0.0515073	3	-0.253838	0.0109141	-0.0528443	0.560366	0.863626	FALSE	None
PNPO	3	-0.128823	0.013932	3	-0.130334	0.0203617	-0.0314691	0.762343	0.927896	FALSE	None
PNRC2	3	-0.488634	0.121667	3	-0.347847	0.108891	0.123087	0.209621	0.643349	FALSE	None
POLA1	3	-1.45737	0.432198	3	-1.4475	0.631753	-0.112251	0.366347	0.775704	FALSE	None
POLB	3	-0.0896478	0.00246329	3	-0.165358	0.0499337	-0.11089	0.208989	0.643349	FALSE	None
POLD1	3	-0.0500073	0.0793865	3	-0.0672644	0.0107502	-0.0686889	0.507596	0.842231	FALSE	None
POLD3	3	-1.9884	0.422754	3	-1.26962	0.266296	0.569142	1.14221e-05	0.00230726	TRUE	None
POLE	3	-1.93143	0.539657	3	-1.9313	1.32898	-0.194299	0.268379	0.705892	FALSE	None
POLE3	3	-0.273595	0.0221743	3	-0.389898	0.1063	-0.118927	0.297473	0.725944	FALSE	None
POLE4	3	-0.383532	0.0288173	3	-0.290793	0.0251518	0.0881988	0.308386	0.736336	FALSE	None
POLG2	3	-0.254272	0.00634375	3	-0.0541593	0.0045289	0.153901	0.0926824	0.473957	FALSE	None
POLH	3	-0.36032	0.0270951	3	-0.284664	0.0278285	0.103543	0.311002	0.739086	FALSE	None
POLI	3	-0.193677	0.0620167	3	-0.280144	0.0377298	-0.0869285	0.361502	0.774318	FALSE	None
POLK	3	-0.306284	0.000244926	3	-0.0662544	0.048131	0.207844	0.102597	0.493445	FALSE	None
POLL	3	-0.0447336	0.0430298	3	-0.183363	0.0386663	-0.158273	0.168393	0.580466	FALSE	None
POLM	3	-0.0509845	0.0251783	3	0.114704	0.00632235	0.0733138	0.436785	0.804489	FALSE	None
POLN	3	-0.0872022	0.010304	3	-0.110499	0.00747305	-0.0501479	0.596335	0.869937	FALSE	None
POLQ	3	-0.630591	0.00940674	3	-0.403851	0.0456218	0.240854	0.015767	0.246404	TRUE	None
POLR2G	3	-2.62088	0.0879641	3	-2.61677	0.0689652	-0.270084	0.0972822	0.478599	FALSE	None
POT1	3	-0.409919	0.00516393	3	-0.251598	0.00968801	0.162294	0.09054	0.472668	FALSE	None
PPHLN1	3	-0.0945622	0.0185429	3	-0.15742	0.0261086	-0.0992379	0.378469	0.778461	FALSE	None
PPM1G	3	-0.0903421	0.0587264	3	-0.0162045	0.00111332	0.0364082	0.739929	0.920356	FALSE	None
PPP1R18	3	-0.339453	0.0271117	3	-0.204199	0.0132565	0.139178	0.143735	0.552714	FALSE	None
PTPA	3	-0.25503	0.0458186	3	-0.278153	0.0785023	-0.0192595	0.846661	0.963467	FALSE	None
PPP6R3	3	-0.015167	0.0211411	3	0.0652936	0.000126627	0.0438252	0.65237	0.888872	FALSE	None
SLC66A2	3	0.0114472	0.00446479	3	-0.0391151	0.0716251	-0.084259	0.350435	0.768009	FALSE	None
PRDX1	3	-0.257613	0.0386553	3	-0.0126881	0.0352327	0.202304	0.0437312	0.388695	FALSE	None
PRKAA1	3	-0.187576	0.0088407	3	0.0334544	0.0113586	0.165364	0.0603245	0.417313	FALSE	None
PRKAG1	3	-0.232731	0.00278427	3	-0.20575	0.0941867	0.023098	0.832075	0.958112	FALSE	None
PRKDC	3	-0.282741	0.0549873	3	-0.0239035	0.0211542	0.229479	0.0267346	0.303894	FALSE	None
PRPF40B	3	-0.235002	0.00568905	3	-0.0815311	0.00417369	0.114952	0.220373	0.654508	FALSE	None
GINS3	3	-0.230024	0.00610008	3	-0.181265	0.00789416	0.0439166	0.62405	0.876229	FALSE	None
PSMC3IP	3	-0.19818	0.0700034	3	-0.223132	0.112888	-0.0439806	0.649864	0.886976	FALSE	None
PSMD6	3	-1.30404	0.735739	3	-0.980243	0.390536	0.24339	0.0126981	0.213752	TRUE	None
PSPC1	3	-0.0344064	0.0213981	3	-0.111701	0.0246647	-0.120095	0.153189	0.566743	FALSE	None
PTAR1	3	-0.42613	0.0105448	3	-0.201051	0.0448735	0.219832	0.0348872	0.345452	FALSE	None
PTBP1	3	-0.284735	0.00634377	3	-0.229854	0.0220652	0.064264	0.533315	0.855779	FALSE	None
PTEN	3	0.766872	0.00355797	3	0.667385	0.0145154	-0.0640299	0.534512	0.855779	FALSE	None
PTK7	3	-0.103249	0.00563696	3	-0.048564	0.0324361	0.0066613	0.957858	0.992698	FALSE	None
PXMP4	3	-0.337599	0.0266027	3	-0.291799	0.0502198	0.0437594	0.645688	0.885334	FALSE	None
PYCARD	3	-0.395512	0.00779207	3	-0.273958	0.0847826	0.114324	0.294645	0.725944	FALSE	None
QRICH1	3	-0.317565	0.0214379	3	-0.42194	0.112433	-0.0909721	0.437126	0.804489	FALSE	None
QSOX2	3	-0.247668	0.0440842	3	-0.279352	0.0317976	-0.0463734	0.612828	0.875621	FALSE	None
RAB10	3	-0.485306	0.00658203	3	-0.315322	0.0578286	0.187567	0.0929143	0.473957	FALSE	None
RAB40B	3	-0.00711584	0.0275221	3	-0.120861	0.00531276	-0.146341	0.175584	0.601151	FALSE	None
RABL3	3	0.0838366	0.0251224	3	0.147314	0.00315525	-0.0113758	0.903317	0.97995	FALSE	None
RABL6	3	-0.0735856	0.0401962	3	-0.174456	0.0209144	-0.127917	0.199226	0.632762	FALSE	None
RAC2	3	-0.0231227	0.0033667	3	0.0398833	0.0227821	-0.00904971	0.927783	0.981215	FALSE	None
RAD1	3	-0.336917	0.016026	3	-0.237028	0.031169	0.0727151	0.508069	0.842231	FALSE	None
RAD17	3	-0.381359	0.0239345	3	-0.512232	0.0822932	-0.116945	0.221012	0.654508	FALSE	None
RAD18	3	-0.21972	0.0337661	3	-0.16642	0.00997833	0.0413786	0.690481	0.903685	FALSE	None
RAD50	3	-0.139231	0.0309784	3	-0.088535	0.0401539	0.0111212	0.911283	0.97995	FALSE	None
RAD51	3	-1.53678	0.400122	3	-1.15029	0.256179	0.279353	0.0414163	0.388695	FALSE	None
RAD51B	3	-0.586869	0.032333	3	-0.464362	0.102455	0.133778	0.159917	0.572751	FALSE	None
RAD51C	3	-1.27187	0.144034	3	-1.08547	0.00467474	0.112379	0.333567	0.758658	FALSE	None
RAD51D	3	-0.685133	0.00301755	3	-0.325511	0.0356571	0.390012	0.00034857	0.0233773	TRUE	None
RAD52	3	-0.392143	0.0787779	3	-0.135344	0.0609655	0.248637	0.0272789	0.30613	FALSE	None
RAD54B	3	-0.268827	0.125918	3	-0.153087	0.0356857	0.1113	0.338442	0.759801	FALSE	None
RAD54L	3	-0.37519	0.0128248	3	-0.335457	0.057052	0.0527742	0.605589	0.872085	FALSE	None
RAD54L2	3	0.04168	0.00156268	3	-0.0679863	0.0573367	-0.159061	0.121446	0.513667	FALSE	None
UBE2B	3	-0.00449975	0.0113612	3	-0.0713555	0.0619213	-0.133515	0.207851	0.643349	FALSE	None
RAI1	3	-0.180788	0.00432663	3	-0.127441	0.0840888	0.0218643	0.809067	0.952327	FALSE	None
RALGAPB	3	0.338565	0.0631006	3	0.0463609	0.134627	-0.350421	0.000853223	0.0374676	TRUE	None
RANBP1	3	-0.881851	0.0610402	3	-0.551703	0.0659872	0.302445	0.00661174	0.148646	TRUE	None
RAP1A	3	-0.111678	0.0181263	3	-0.0626696	0.00353414	0.0116798	0.902869	0.97995	FALSE	None
RARB	3	-0.211169	0.0186809	3	-0.141855	0.0165736	0.0415356	0.679502	0.903685	FALSE	None
RB1	3	0.239809	0.000704546	3	0.358503	0.00566693	0.0518767	0.595323	0.869937	FALSE	None
RB1CC1	3	-0.0203446	0.0571288	3	0.00527576	0.0756515	-0.0240758	0.793768	0.943183	FALSE	None
RBM10	3	-0.255162	0.00256305	3	-0.131211	0.000173349	0.116063	0.262011	0.704695	FALSE	None
RBM18	3	-0.202741	0.0429601	3	-0.0871969	0.0568441	0.0925018	0.360389	0.774318	FALSE	None
RBP1	3	-0.103814	0.0789499	3	-0.0147153	0.0858035	0.0487907	0.620907	0.876229	FALSE	None
RECQL	3	-0.115266	0.17579	3	0.0509299	0.0114667	0.125118	0.305094	0.731935	FALSE	None
RECQL4	3	0.0494058	0.0395605	3	0.146034	0.0718111	0.0511864	0.552107	0.862295	FALSE	None
RECQL5	3	-0.0156081	0.00678505	3	-0.0433632	0.0292464	-0.0625111	0.465169	0.821136	FALSE	None
REST	3	-0.384046	0.0496554	3	-0.585708	0.100959	-0.186944	0.172811	0.59367	FALSE	None
RET	3	0.0864842	0.0246469	3	0.0957882	0.0282373	-0.0828235	0.433952	0.804489	FALSE	None
REV1	3	-0.627891	0.410819	3	-0.666879	0.243548	-0.0644592	0.583599	0.8695	FALSE	None
REV3L	3	-0.599155	0.00820728	3	-0.435405	0.0127041	0.176404	0.120496	0.513667	FALSE	None
REXO2	3	-0.146516	0.0123241	3	-0.0437657	0.011123	0.0694879	0.477331	0.828396	FALSE	None
COP1	3	-0.185317	0.0152458	3	-0.160012	0.0856455	0.0179731	0.848996	0.963467	FALSE	None
RHBDD3	3	-0.182023	0.00240304	3	-0.132458	0.0580718	0.0497881	0.613545	0.875621	FALSE	None
RHNO1	3	-0.0876993	0.0495484	3	-0.0279766	0.0307425	0.0217148	0.82215	0.953466	FALSE	None
RHOBTB1	3	-0.256085	0.041702	3	-0.163661	0.0939043	0.0694568	0.438088	0.804489	FALSE	None
RIC8A	3	-0.875595	0.0428086	3	-0.394918	0.017317	0.494417	0.000105891	0.00891252	TRUE	None
RIF1	3	-0.396333	0.011019	3	-0.168562	0.00591429	0.234408	0.0329376	0.33455	FALSE	None
RMI1	3	-0.0747683	0.00904757	3	-0.0518826	0.0372855	-0.0263915	0.810759	0.952327	FALSE	None
RMI2	3	-0.137279	3.4486e-05	3	-0.0409976	0.0144954	0.0483223	0.569342	0.866017	FALSE	None
RMND1	3	-0.144125	0.00182603	3	-0.140048	0.103496	-0.0319474	0.766592	0.929663	FALSE	None
RNF10	3	-0.215529	0.0156777	3	-0.301476	0.00258436	-0.089789	0.407959	0.792779	FALSE	None
RNF103	3	-0.17745	0.0184085	3	-0.437191	0.194342	-0.277262	0.21715	0.654508	FALSE	None
RNF11	3	-0.252026	0.0596514	3	-0.281263	0.061083	-0.0430703	0.634172	0.879684	FALSE	None
RNF111	3	-0.0508226	0.0106424	3	-0.0498312	0.0127884	-0.0536576	0.55085	0.862295	FALSE	None
RNF112	3	-0.0626767	0.000122429	3	-0.0992693	0.0298908	-0.0675377	0.482152	0.828748	FALSE	None
RNF113B	3	-0.0508187	0.0131625	3	-0.0106904	0.0248333	-0.013353	0.884826	0.976402	FALSE	None
RNF114	3	-0.0133724	0.0470733	3	-0.328661	0.0450385	-0.342329	0.000820735	0.0374676	TRUE	None
RNF115	3	-0.14207	0.00875235	3	-0.280755	0.0584159	-0.155914	0.0726327	0.441529	FALSE	None
RNF121	3	-0.271645	0.00885744	3	-0.261011	0.00837077	0.0166323	0.850609	0.963689	FALSE	None
RNF122	3	-0.0954185	0.037166	3	0.0500329	0.0299231	0.0917865	0.294944	0.725944	FALSE	None
RNF123	3	-0.27107	0.00522732	3	-0.144234	0.00441941	0.112241	0.298284	0.725944	FALSE	None
RNF125	3	0.0950327	0.0150858	3	0.0971678	0.0239081	-0.0632085	0.46423	0.821136	FALSE	None
RNF126	3	0.0993428	0.0272295	3	-0.0351978	0.00569476	-0.183925	0.0701598	0.441529	FALSE	None
RNF128	3	-0.0184532	0.0760963	3	-0.0422122	0.013946	-0.0739537	0.480425	0.828748	FALSE	None
RNF13	3	-0.322043	0.00772208	3	-0.380788	0.0552789	-0.0452414	0.625754	0.876229	FALSE	None
RNF130	3	-0.102755	0.0202381	3	-0.0644725	0.0518308	0.00593622	0.946942	0.98829	FALSE	None
RNF133	3	0.0752037	0.0489693	3	0.0984035	0.035117	-0.0231556	0.822047	0.953466	FALSE	None
RNF135	3	-0.233708	0.0110551	3	-0.01057	0.0208896	0.187277	0.138169	0.544481	FALSE	None
RNF138	3	0.0579226	0.018084	3	-0.0662501	0.0171211	-0.163309	0.0661237	0.433668	FALSE	None
RNF139	3	-0.124301	0.00298663	3	-0.225038	0.0413777	-0.116201	0.26766	0.705892	FALSE	None
RNF14	3	-0.337891	0.00711737	3	-0.173891	0.0142096	0.161854	0.139751	0.547087	FALSE	None
RNF141	3	-0.178519	0.0463912	3	-0.143625	0.0530615	0.00541917	0.950128	0.98829	FALSE	None
RNF144B	3	-0.102044	0.059358	3	-0.110303	0.0766715	-0.0600717	0.496728	0.838571	FALSE	None
RNF145	3	-0.27196	0.0294229	3	-0.195483	0.157292	0.0503226	0.61727	0.875621	FALSE	None
RNF146	3	0.121513	0.0208677	3	0.178217	0.0462167	-0.0158539	0.863729	0.969296	FALSE	None
RNF148	3	-0.140032	0.018866	3	-0.183715	0.0229225	-0.0395532	0.682662	0.903685	FALSE	None
RNF149	3	-0.306081	0.382022	3	-0.313342	0.384642	-0.0383893	0.731198	0.916065	FALSE	None
RNF150	3	-0.0804068	0.0205391	3	-0.1161	0.0117159	-0.0642928	0.458729	0.821136	FALSE	None
RNF151	3	-0.0994621	0.00665785	3	0.00967111	0.0448299	0.0627458	0.568153	0.865512	FALSE	None
RNF152	3	-0.00747387	0.003605	3	-0.0905886	0.105982	-0.150539	0.151977	0.564325	FALSE	None
RNF157	3	-0.0640213	0.00396539	3	-0.0096476	0.0412709	0.00151956	0.986915	0.993803	FALSE	None
RNF165	3	0.0949422	0.065425	3	0.0284513	0.027004	-0.128182	0.155637	0.570731	FALSE	None
RNF166	3	-0.0311785	0.0186077	3	-0.0511798	0.0122662	-0.0571739	0.533931	0.855779	FALSE	None
RNF167	3	-0.124188	0.0304725	3	-0.131188	0.048871	-0.0497646	0.579286	0.8695	FALSE	None
RNF168	3	-0.223029	0.0424703	3	-0.346092	0.0243627	-0.105139	0.362626	0.774318	FALSE	None
RNF169	3	-0.192225	0.0242638	3	-0.31454	0.0725346	-0.122605	0.205808	0.643349	FALSE	None
RNF17	3	-0.113885	0.0257198	3	0.0116475	0.00414505	0.0817259	0.404282	0.790976	FALSE	None
RNF170	3	0.179366	0.00155385	3	-0.116862	0.0131987	-0.35092	0.000843449	0.0374676	TRUE	None
RNF175	3	-0.0347926	0.000255549	3	-0.00940455	0.0219343	-0.0179534	0.860236	0.96747	FALSE	None
RNF180	3	-0.205107	0.0884723	3	-0.251576	0.0302584	-0.0446711	0.759078	0.927896	FALSE	None
RNF181	3	-0.0749766	0.0765695	3	-0.198504	0.00490021	-0.161618	0.150547	0.561578	FALSE	None
RNF182	3	-0.00365657	0.00370248	3	-0.00279498	0.0100228	-0.0477833	0.594766	0.869937	FALSE	None
RNF183	3	-0.264188	0.00302251	3	-0.192039	0.0697571	0.0561407	0.603468	0.872085	FALSE	None
RNF185	3	-0.247139	0.0213818	3	-0.265221	0.0184527	-0.0314457	0.754982	0.927896	FALSE	None
RNF186	3	-0.13309	0.0372953	3	-0.0643256	0.0214994	0.0319076	0.771344	0.929663	FALSE	None
RNF187	3	-0.0824819	0.0030903	3	0.0724269	0.0775258	0.107579	0.252062	0.697488	FALSE	None
RNF19A	3	-0.188853	0.0408924	3	-0.0935991	0.0500208	0.0815515	0.46444	0.821136	FALSE	None
RNF19B	3	-0.0926554	0.0696746	3	-0.157681	0.0223754	-0.0917189	0.353596	0.771344	FALSE	None
RNF2	3	0.0733751	0.0667815	3	0.0863763	0.020142	-0.0524081	0.542949	0.859527	FALSE	None
RNF207	3	-0.184849	0.0827444	3	-0.076087	0.0283329	0.0648875	0.540933	0.859029	FALSE	None
RNF208	3	-0.0479246	0.0140824	3	0.0796631	0.00743072	0.0673448	0.422681	0.798437	FALSE	None
RNF212	3	-0.227144	0.0367581	3	-0.0430883	0.00842532	0.140236	0.232802	0.673228	FALSE	None
RNF213	3	-0.199769	0.0635214	3	-0.119845	0.0157258	0.0454041	0.675535	0.903685	FALSE	None
RNF214	3	0.11414	0.00107834	3	0.112705	0.000223191	-0.0838381	0.383835	0.778461	FALSE	None
RNF215	3	-0.189355	0.0258975	3	-0.150643	0.00292117	0.0312552	0.770467	0.929663	FALSE	None
RNF216	3	-0.247511	0.000961571	3	-0.337462	0.123147	-0.0823635	0.478993	0.828396	FALSE	None
RNF217	3	-0.207988	0.00128195	3	-0.380745	0.0678552	-0.185297	0.0584567	0.417313	FALSE	None
OBI1	3	0.0118887	0.0151376	3	0.131657	0.00308888	0.0392536	0.705068	0.908948	FALSE	None
RNF220	3	-0.193438	0.0263015	3	-0.11475	0.0226069	0.0499147	0.629483	0.876935	FALSE	None
RNF222	3	-0.18208	0.0265304	3	-0.328228	0.024536	-0.132986	0.154081	0.567964	FALSE	None
RNF223	3	-0.187971	0.00398131	3	-0.0340007	0.0178203	0.132475	0.135031	0.541195	FALSE	None
RNF24	3	0.0401896	0.00709747	3	-0.0351821	0.0108277	-0.14959	0.108975	0.50258	FALSE	None
RNF25	3	-0.547345	0.0279314	3	-0.40044	0.0184101	0.159206	0.0912578	0.472668	FALSE	None
RNF26	3	-0.03801	0.0108493	3	0.0574117	0.0301931	0.0519977	0.575022	0.86812	FALSE	None
RNF31	3	-0.242677	0.0190962	3	-0.387199	0.00034825	-0.140547	0.239871	0.686316	FALSE	None
RNF32	3	-0.015612	0.0112323	3	-0.209178	0.0544564	-0.225247	0.0312881	0.325783	FALSE	None
RNF34	3	-0.124289	0.0131011	3	-0.166913	0.151427	-0.0697903	0.506928	0.842231	FALSE	None
RNF38	3	-0.230179	0.0140407	3	-0.196831	0.341466	-0.000216891	0.998689	0.999211	FALSE	None
RNF39	3	-0.221346	0.0396344	3	-0.526489	0.0547559	-0.272406	0.0171483	0.251011	TRUE	None
RNF4	3	-0.442714	0.0241094	3	-0.467146	0.079912	-0.013773	0.898446	0.97995	FALSE	None
RNF40	3	-0.663036	0.0590447	3	-0.724044	0.0168899	-0.0808592	0.512166	0.843863	FALSE	None
RNF41	3	-0.0814122	0.0129379	3	-0.13467	0.0337651	-0.0875548	0.430032	0.804489	FALSE	None
RNF43	3	-0.265019	0.0873579	3	-0.21625	0.00256718	0.010208	0.923992	0.980649	FALSE	None
RNF44	3	-0.244261	0.00210115	3	-0.0352245	0.0556745	0.178998	0.167748	0.580466	FALSE	None
RNF5	3	-0.540947	0.292798	3	-0.352855	0.304085	0.150268	0.128485	0.525386	FALSE	None
RNF6	3	0.0185756	0.00533418	3	-0.0640443	0.0175411	-0.140688	0.221625	0.654508	FALSE	None
RNF7	3	-0.00416521	0.473906	3	-0.2127	0.627254	-0.252357	0.0631251	0.425042	FALSE	None
RNF8	3	-0.543731	0.154748	3	-0.551513	0.151967	-0.0096457	0.916041	0.97995	FALSE	None
RNH1	3	-0.201389	0.0458722	3	-0.126058	0.0348289	0.0494195	0.605834	0.872085	FALSE	None
ROBO1	3	-0.0479907	0.0195307	3	0.0538317	0.00613694	0.0380409	0.687422	0.903685	FALSE	None
ROBO2	3	-0.0524032	0.0354383	3	0.104828	0.00230509	0.0987842	0.31709	0.748273	FALSE	None
ROCK2	3	0.130868	0.0203791	3	0.27388	0.0382603	0.0707255	0.493589	0.837348	FALSE	None
ROR2	3	-0.309184	0.0598072	3	0.0050441	0.09231	0.265576	0.0249801	0.300355	FALSE	None
RPA1	3	-2.34718	1.03786	3	-2.13922	0.899312	-0.00736928	0.972882	0.992859	FALSE	None
RPA2	3	-2.19115	0.224636	3	-2.0482	0.443732	-0.0814069	0.595703	0.869937	FALSE	None
RPA3	3	-1.34395	1.56092	3	-1.35863	1.51016	-0.200308	0.122725	0.516466	FALSE	None
RPL36	3	-1.3601	0.0627913	3	-1.34249	0.173542	-0.0944123	0.514072	0.845623	FALSE	None
RPP25L	3	-0.873814	0.0955089	3	-0.649264	0.00935284	0.217756	0.0778404	0.451832	FALSE	None
RPS25	3	-1.85545	0.869784	3	-1.41746	0.282425	0.266207	0.148813	0.560826	FALSE	None
RPS3	3	-2.1817	0.784446	3	-1.63998	0.588741	0.351113	0.00619162	0.148646	TRUE	None
RPS6KB1	3	-0.256434	0.0295844	3	-0.170173	0.00331203	0.0650524	0.526373	0.853674	FALSE	None
RPSA	3	-3.53068	1.06494	3	-2.94417	0.732494	0.353671	0.00766105	0.151719	TRUE	None
RPUSD3	3	-0.349985	0.0807939	3	-0.305119	0.0966076	0.0540893	0.616864	0.875621	FALSE	None
CNOT9	3	-0.341146	0.0638177	3	-0.499841	0.110641	-0.138149	0.184724	0.617787	FALSE	None
RRAGA	3	-0.326778	0.202995	3	-0.490822	0.0975516	-0.165923	0.0922568	0.473957	FALSE	None
RUNX1	3	0.618832	0.0395544	3	0.590806	0.0315458	-0.0255089	0.786023	0.937288	FALSE	None
RWDD1	3	-0.28702	0.0192004	3	-0.155413	0.015508	0.137419	0.19316	0.623297	FALSE	None
SAP30	3	0.201949	0.00291007	3	0.0747065	0.0133625	-0.188309	0.045833	0.388695	FALSE	None
SART3	3	-1.5253	0.109818	3	-1.2865	0.115396	0.118337	0.404465	0.790976	FALSE	None
SBDS	3	-0.723164	0.017214	3	-0.45902	0.0237846	0.276978	0.0158577	0.246404	TRUE	None
SCAP	3	-1.02908	0.115472	3	-0.567703	0.00750254	0.441599	0.00125249	0.0484942	TRUE	None
SCAPER	3	-0.181286	0.0180532	3	-0.272345	0.0256045	-0.101728	0.285787	0.721527	FALSE	None
SCD	3	-0.742245	0.0499708	3	-0.710524	0.128666	0.032692	0.752876	0.927896	FALSE	None
SCNM1	3	-0.325492	0.103504	3	-0.321937	0.0928735	-0.00186618	0.985586	0.993803	FALSE	None
SDHB	3	-0.189801	0.0354462	3	-0.0914369	0.0366739	0.0674469	0.463101	0.821136	FALSE	None
SDHD	3	-0.17192	0.00626982	3	-0.23722	0.0111373	-0.0760414	0.415045	0.798387	FALSE	None
SDK1	3	-0.207984	0.00683304	3	-0.081708	0.0718983	0.0671459	0.503432	0.842231	FALSE	None
SEMA3A	3	0.39597	0.0587076	3	0.359957	0.00269076	-0.0922359	0.342454	0.762685	FALSE	None
SEMA3E	3	0.0313827	0.0183732	3	-0.166703	0.0216018	-0.247727	0.047225	0.390961	FALSE	None
SENP1	3	-0.175984	0.0620961	3	-0.406456	0.14939	-0.240637	0.116204	0.510424	FALSE	None
SENP2	3	-0.222093	0.0017379	3	-0.238492	0.00238292	-0.0243271	0.800963	0.946519	FALSE	None
SEPHS1	3	-0.315864	0.0159845	3	-0.318609	0.0696185	-0.00610763	0.962248	0.992698	FALSE	None
SEPHS2	3	-0.112702	0.00133505	3	-0.0116041	0.0614874	0.0687421	0.474725	0.826676	FALSE	None
SEPTIN11	3	0.0288166	0.000907662	3	0.195824	0.0187623	0.080402	0.397385	0.789166	FALSE	None
SERPIND1	3	-0.303301	0.0104304	3	-0.225	0.071114	0.0611949	0.510835	0.843045	FALSE	None
SETD1B	3	0.412296	0.00530668	3	0.338721	0.0167278	-0.131573	0.194194	0.624638	FALSE	None
SETD2	3	-0.369059	0.293228	3	-0.481399	0.0479116	-0.112849	0.343327	0.762685	FALSE	None
KMT5A	3	-0.364703	0.250126	3	-0.424967	0.208927	-0.0740968	0.538859	0.858035	FALSE	None
SETDB1	3	0.121161	0.00346116	3	0.123359	0.00836135	-0.0706246	0.421424	0.798437	FALSE	None
RSKR	3	-0.256036	0.0106191	3	-0.277164	0.0484019	-0.0304385	0.8193	0.953333	FALSE	None
SGSM2	3	-0.304281	0.0239228	3	-0.121166	0.0564119	0.175445	0.0673366	0.438495	FALSE	None
SHKBP1	3	0.0944673	0.00660926	3	-0.00178993	0.0550631	-0.165327	0.137489	0.544481	FALSE	None
SHMT1	3	-0.112635	0.0106421	3	0.0249375	0.033622	0.0735656	0.473046	0.825435	FALSE	None
SHMT2	3	-0.0994739	0.0670592	3	-0.145352	0.0694649	-0.0827414	0.338925	0.759801	FALSE	None
SHPRH	3	-0.0544405	0.000528626	3	-0.101355	0.0138389	-0.0975952	0.267101	0.705892	FALSE	None
SIRT6	3	0.129232	0.0138648	3	0.0311424	0.0178577	-0.156853	0.1304	0.526815	FALSE	None
SKI	3	-0.247241	0.0107645	3	-0.318609	0.0726042	-0.0676999	0.497331	0.838571	FALSE	None
SLC16A1	3	-0.224545	0.0822966	3	-0.0452379	0.0182944	0.153429	0.140636	0.548428	FALSE	None
SLC16A10	3	0.0574351	0.0408245	3	-0.14451	0.0314302	-0.247424	0.0207419	0.27675	TRUE	None
SLC16A3	3	0.103952	0.0235555	3	-0.0815344	0.0028141	-0.23549	0.0214579	0.27675	TRUE	None
SLC1A5	3	-0.10828	0.0538385	3	-0.124081	0.0796929	-0.0401323	0.659606	0.894186	FALSE	None
SLC20A1	3	-0.178068	0.00107185	3	-0.154652	0.0243039	-0.00385212	0.971209	0.992859	FALSE	None
SLC25A1	3	-0.265114	0.0698744	3	-0.20527	0.00675334	0.0689055	0.520376	0.849079	FALSE	None
SLC25A28	3	-0.230531	0.0414663	3	-0.297435	0.00708309	-0.0699061	0.483265	0.828748	FALSE	None
SLC25A32	3	-0.161781	0.0418261	3	-0.215057	0.0399802	-0.0686089	0.505102	0.842231	FALSE	None
SLC25A37	3	-0.0447296	0.0454122	3	-0.0313465	0.0229322	-0.0393266	0.660458	0.894186	FALSE	None
SLC26A6	3	-0.281971	0.116055	3	-0.18364	0.185013	0.0710713	0.517007	0.84769	FALSE	None
SLC2A1	3	-0.314228	0.0197253	3	-0.409858	0.0371877	-0.0711851	0.458102	0.821136	FALSE	None
SLC33A1	3	-0.153738	0.0318948	3	0.0251649	0.0662305	0.134435	0.14635	0.55569	FALSE	None
SLC35A1	3	-0.177868	0.00444868	3	-0.0803535	0.00203682	0.0798297	0.418542	0.798437	FALSE	None
SLC35B2	3	-0.303906	0.0768489	3	-0.143618	0.020208	0.149755	0.185474	0.618245	FALSE	None
SLC38A2	3	-0.215364	0.0601875	3	-0.217963	0.0323619	-0.0103031	0.919039	0.980649	FALSE	None
SLC39A9	3	0.151182	0.119987	3	0.122013	0.0507208	-0.0839677	0.371875	0.776438	FALSE	None
SLC3A2	3	-0.439229	0.0363261	3	-0.531965	0.095401	-0.0905742	0.348495	0.766841	FALSE	None
SLC4A2	3	-0.115483	0.000441692	3	0.186137	0.0477276	0.236365	0.049939	0.400305	FALSE	None
SLC7A1	3	-0.0763724	0.00955983	3	-0.177895	0.0383148	-0.144682	0.141775	0.549737	FALSE	None
SLC7A11	3	-0.251664	0.0710113	3	-0.235185	0.0477892	0.00248851	0.981958	0.993765	FALSE	None
SLC7A5	3	-0.239352	0.152431	3	-0.152446	0.0535568	0.0440298	0.712786	0.910131	FALSE	None
GINS4	3	-0.59385	0.18064	3	-0.410096	0.115762	0.181672	0.105306	0.500828	FALSE	None
SLFN11	3	-0.277338	0.0172876	3	-0.33245	0.103281	-0.0543363	0.58854	0.869937	FALSE	None
SLIT2	3	0.101956	0.00100637	3	0.105427	0.000807361	-0.0677545	0.446514	0.811347	FALSE	None
SLX1A	3	-0.148505	0.0108227	3	-0.208868	0.0249954	-0.0856845	0.302688	0.731434	FALSE	None
SLX4	3	-0.741741	0.0716177	3	-0.538507	0.0754386	0.202413	0.0703773	0.441529	FALSE	None
SMAD2	3	-0.0162739	0.0128334	3	-0.154911	0.0371671	-0.180789	0.129439	0.525682	FALSE	None
SMAD4	3	-0.177715	0.0526146	3	0.0813148	0.00098269	0.210563	0.0792641	0.454868	FALSE	None
SMARCA1	3	-0.0977959	0.0020036	3	-0.01036	0.0246209	0.0486974	0.622889	0.876229	FALSE	None
SMARCA4	3	-0.116965	0.150639	3	-0.0493237	0.00653537	0.0464211	0.762301	0.927896	FALSE	None
SMARCAL1	3	0.00945974	0.00087976	3	0.0539851	0.0768717	-0.0185704	0.860589	0.96747	FALSE	None
SMARCB1	3	-0.844516	0.0374971	3	-0.360078	0.012605	0.499402	1.66128e-05	0.0025824	TRUE	None
SMARCC1	3	-0.253296	0.0416282	3	-0.249461	0.0182892	-0.0154227	0.868292	0.970105	FALSE	None
SMARCD1	3	0.121514	0.0500607	3	0.0430054	0.0650177	-0.13326	0.177415	0.605155	FALSE	None
PPP4R3A	3	-0.179129	0.0969834	3	-0.161771	0.146414	-0.00544414	0.953351	0.989603	FALSE	None
SNAP23	3	-0.161995	0.06815	3	-0.57496	0.0433109	-0.399475	0.00211677	0.0668105	TRUE	None
SOD2	3	-0.0226125	0.0362881	3	-0.0608071	0.0150757	-0.079388	0.449844	0.814234	FALSE	None
SOX2	3	-0.0440254	0.0110854	3	-0.143558	0.0387279	-0.12788	0.211798	0.646273	FALSE	None
SOX9	3	-0.371715	0.0503285	3	-0.37659	0.00480454	-0.00745633	0.943778	0.98829	FALSE	None
SPEN	3	-0.644065	0.077525	3	-0.392863	0.0544746	0.278052	0.00729361	0.148646	TRUE	None
SPOP	3	0.196833	0.028385	3	0.043738	0.00621477	-0.227272	0.0409615	0.388695	FALSE	None
SPTLC2	3	-0.524933	0.0674265	3	-0.605768	0.0130494	-0.0526844	0.579911	0.8695	FALSE	None
SRM	3	-0.319771	0.0132679	3	-0.11825	0.13501	0.180454	0.118257	0.510424	FALSE	None
SRPRA	3	-0.695465	0.504228	3	-0.804367	0.494162	-0.176551	0.0912205	0.472668	FALSE	None
SRSF5	3	-0.228663	0.00491575	3	-0.236237	0.0197732	-0.00398038	0.969539	0.992859	FALSE	None
NABP2	3	-0.0929083	0.0624774	3	-0.204076	0.0307417	-0.124221	0.300197	0.728844	FALSE	None
NABP1	3	-0.152929	0.0670201	3	-0.129239	0.170001	0.0019503	0.986381	0.993803	FALSE	None
SSBP1	3	-0.160551	0.00430772	3	0.0143683	0.0251078	0.13632	0.126351	0.52301	FALSE	None
SSR3	3	-0.277781	0.0200023	3	-0.282592	0.0227195	-0.0213175	0.834777	0.958112	FALSE	None
STAG1	3	-0.156415	0.0368956	3	0.0168517	0.00621262	0.112906	0.279299	0.717579	FALSE	None
STAG2	3	0.189692	0.0279825	3	0.163477	0.00839098	-0.1017	0.279035	0.717579	FALSE	None
STIP1	3	-0.0375546	0.0579601	3	0.0308255	0.0471102	0.0319656	0.751545	0.927896	FALSE	None
STK11	3	-1.19428	0.185732	3	-0.979313	0.214438	0.140498	0.325107	0.752207	FALSE	None
STOML2	3	-0.215326	0.0594649	3	-0.0538147	0.0253109	0.128368	0.20617	0.643349	FALSE	None
CENPX	3	-0.0714113	0.0025537	3	-0.125036	0.017141	-0.0819521	0.344381	0.762685	FALSE	None
STRAP	3	-1.57361	0.028761	3	-1.07957	0.072233	0.385288	0.000559663	0.0332505	TRUE	None
STT3A	3	-0.196474	0.00103536	3	-0.250061	0.00639663	-0.0597867	0.566924	0.865512	FALSE	None
STUB1	3	-0.530415	0.00104684	3	-0.228466	0.00939804	0.302795	0.00694265	0.148646	TRUE	None
STX4	3	-0.0762416	0.00471729	3	-0.0826315	0.0188598	-0.0529488	0.584648	0.8695	FALSE	None
SUMO1	3	-0.119718	0.0669518	3	0.168914	0.0129996	0.20212	0.0896974	0.472668	FALSE	None
SUMO2	3	-0.151121	0.0202643	3	-0.253179	0.0722619	-0.115141	0.333134	0.758658	FALSE	None
SUMO3	3	-0.00828635	0.0438235	3	-0.012983	0.016511	-0.03983	0.734666	0.916065	FALSE	None
SUPT20H	3	-0.12163	0.123019	3	0.0308817	0.0577331	0.116361	0.293851	0.725944	FALSE	None
SURF1	3	-0.0921014	0.0575188	3	-0.108118	0.0167028	-0.0437734	0.622782	0.876229	FALSE	None
SUV39H1	3	-0.244555	0.0203477	3	-0.17134	0.0082892	0.0763322	0.397429	0.789166	FALSE	None
SUZ12	3	0.0287157	0.00985655	3	0.08286	0.0478399	-0.0218525	0.833195	0.958112	FALSE	None
SYVN1	3	-0.307749	0.0966055	3	-0.43076	0.0662552	-0.120974	0.268125	0.705892	FALSE	None
TACO1	3	-0.222239	0.000873197	3	0.0211763	0.00777398	0.219253	0.0197692	0.273519	TRUE	None
TADA1	3	0.0955912	0.00625804	3	0.26989	0.0301249	0.104609	0.220726	0.654508	FALSE	None
TADA2B	3	0.0306223	0.0685177	3	0.0200037	0.012211	-0.0736416	0.463238	0.821136	FALSE	None
TAF4	3	-0.821168	0.0578882	3	-0.871184	0.00854695	-0.0537854	0.643723	0.884572	FALSE	None
TAF5L	3	0.10362	0.00702222	3	0.252843	0.0326114	0.070449	0.431117	0.804489	FALSE	None
TANK	3	-0.154495	0.0376138	3	-0.0484201	0.0192302	0.0547053	0.574627	0.86812	FALSE	None
TAOK1	3	0.721476	0.00802988	3	0.708844	0.0186301	0.0221183	0.802113	0.946519	FALSE	None
TAPT1	3	-0.0626289	0.00548504	3	-0.263707	0.0200547	-0.221612	0.0155279	0.246404	TRUE	None
WWTR1	3	-0.302185	0.0433998	3	-0.0940692	0.0368716	0.183535	0.142061	0.549737	FALSE	None
TEAD4	3	-0.293931	0.0691366	3	-0.331796	0.0260304	-0.0233681	0.819088	0.953333	FALSE	None
TECR	3	-0.443972	0.135971	3	-0.282418	0.119508	0.161655	0.103611	0.495957	FALSE	None
TELO2	3	-0.533546	0.0107405	3	-0.393328	0.0214355	0.165828	0.0981593	0.478599	FALSE	None
TEN1	3	-0.334512	0.00973831	3	-0.183919	0.00402505	0.144142	0.157092	0.570731	FALSE	None
TERT	3	-0.199459	0.013862	3	-0.161182	0.0299226	-0.00258846	0.981748	0.993765	FALSE	None
TET2	3	-0.158902	0.0481793	3	-0.0380451	0.058383	0.0772772	0.516466	0.84769	FALSE	None
TFAP4	3	-0.130142	0.318538	3	0.0592992	0.199183	0.140819	0.16778	0.580466	FALSE	None
TFDP1	3	-0.57604	0.0344912	3	-0.526719	0.159779	0.0701014	0.526573	0.853674	FALSE	None
TFPT	3	-0.260178	0.0180746	3	-0.104688	0.0163636	0.151905	0.107491	0.500828	FALSE	None
TFRC	3	-0.0831967	0.0160355	3	0.036521	0.0133374	0.0891478	0.343834	0.762685	FALSE	None
TGFBR2	3	-0.138165	0.00994646	3	-0.0188671	0.0318195	0.0801062	0.38683	0.782003	FALSE	None
TGIF2	3	-0.174948	0.0147981	3	-0.271615	0.0232752	-0.0782693	0.396922	0.789166	FALSE	None
THAP10	3	-0.0906025	0.0527807	3	-0.198838	0.0487445	-0.157583	0.0759933	0.450072	FALSE	None
THAP3	3	-0.143127	0.0760134	3	-0.16713	0.0264165	-0.0556719	0.54797	0.862295	FALSE	None
TIMM17A	3	-0.344385	0.0190204	3	-0.269252	0.0539126	0.0709961	0.481299	0.828748	FALSE	None
TIMM8A	3	-0.48572	0.0587066	3	-0.308169	0.0143799	0.1593	0.0972614	0.478599	FALSE	None
TIMM8B	3	-0.407235	0.0505726	3	-0.372594	0.148284	0.0426013	0.705638	0.908948	FALSE	None
TIMMDC1	3	-0.112299	0.0277551	3	-0.156263	0.161739	-0.0961983	0.366086	0.775704	FALSE	None
TINF2	3	-0.717397	0.119246	3	-0.939966	0.173548	-0.237718	0.0215876	0.27675	TRUE	None
TIPARP	3	-2.04838	0.290697	3	-1.62171	0.0458092	0.227051	0.127611	0.52393	FALSE	None
TIPIN	3	-1.23003	1.6381	3	-0.939299	1.28807	0.165089	0.177974	0.605155	FALSE	None
TIPRL	3	-0.0788796	0.00385545	3	-0.174112	0.0559853	-0.11837	0.244273	0.69108	FALSE	None
TKT	3	-0.252309	0.0440132	3	-0.0678256	0.0903784	0.160667	0.0985631	0.478599	FALSE	None
TLCD1	3	-0.436234	0.0884545	3	-0.274413	7.53206e-05	0.150912	0.163285	0.57866	FALSE	None
TM2D1	3	-0.210924	0.0609559	3	-0.112398	0.0698981	0.055715	0.587128	0.8695	FALSE	None
TM2D2	3	-0.190706	0.0117302	3	0.00486061	0.00406903	0.182378	0.112111	0.510424	FALSE	None
TM2D3	3	-0.11286	0.0204637	3	-0.205535	0.017047	-0.109583	0.259883	0.701824	FALSE	None
TMCO1	3	-0.0684093	0.00135121	3	-0.0525215	0.0253522	-0.0357705	0.679653	0.903685	FALSE	None
TMEM165	3	-0.0216698	0.0521066	3	0.0421066	0.0879444	0.0210552	0.838586	0.959198	FALSE	None
TMEM208	3	-0.132384	0.0207708	3	-0.0271066	0.0384827	0.052847	0.57806	0.8695	FALSE	None
TNKS	3	-0.16898	0.0182742	3	-0.203028	0.0316303	-0.032022	0.762528	0.927896	FALSE	None
TNPO1	3	-1.2031	0.11258	3	-1.14797	0.0283477	-0.0215352	0.875005	0.971466	FALSE	None
TOMM70	3	-0.409318	0.0707423	3	-0.201284	0.0529299	0.201434	0.0497868	0.400305	FALSE	None
TOPBP1	3	-2.70076	1.6668	3	-2.25638	1.00557	0.247962	0.218394	0.654508	FALSE	None
TP53	3	-0.233056	0.442512	3	-0.452523	0.326538	-0.261652	0.00987405	0.177798	TRUE	None
TP53BP1	3	-0.188292	0.00215054	3	-0.311005	0.0956073	-0.134506	0.226138	0.663951	FALSE	None
TP73	3	-0.0260979	0.000336965	3	-0.118017	0.0216426	-0.0973522	0.350918	0.768009	FALSE	None
TPGS1	3	-0.0385113	0.0773958	3	-0.107678	0.216585	-0.117392	0.269676	0.706157	FALSE	None
TPP1	3	-0.179078	0.0281311	3	-0.135652	0.0743833	0.0188046	0.843599	0.961665	FALSE	None
TPT1	3	-0.768028	0.213117	3	-0.621063	0.445046	0.0839378	0.446643	0.811347	FALSE	None
TREX1	3	-0.263462	0.0558998	3	-0.139887	0.055683	0.12318	0.255274	0.699158	FALSE	None
TERF1	3	-0.354368	0.0687536	3	-0.203103	0.00157869	0.15547	0.166595	0.580466	FALSE	None
TERF2	3	-1.25519	0.553364	3	-0.92638	0.322468	0.243606	0.031035	0.325783	FALSE	None
TRIM28	3	-0.192635	0.0328045	3	-0.0914248	0.0461898	0.0832884	0.420649	0.798437	FALSE	None
TRIM37	3	-0.417417	0.041342	3	-0.371726	0.0343274	0.0619361	0.5428	0.859527	FALSE	None
TRIM71	3	-0.0548095	0.0249967	3	-0.0681316	0.0221083	-0.0675118	0.458403	0.821136	FALSE	None
TRUB2	3	-0.111589	0.0303735	3	-0.247937	0.0315832	-0.153429	0.129599	0.525682	FALSE	None
TSC1	3	0.365057	0.0534179	3	0.449921	0.0179775	0.0408906	0.648699	0.886585	FALSE	None
TSC2	3	0.46125	0.00365455	3	0.484199	0.00235262	-0.0168268	0.861144	0.96747	FALSE	None
TSPYL2	3	-0.0996257	0.00129457	3	-0.0341735	0.0436412	0.0216802	0.815607	0.952327	FALSE	None
EIPR1	3	-0.193	0.00620465	3	-0.193527	0.0465169	-0.017624	0.86695	0.969679	FALSE	None
TTC4	3	-0.286695	0.011056	3	-0.182297	0.0101288	0.0936214	0.379137	0.778461	FALSE	None
TUB	3	-0.216275	0.00367054	3	-0.164948	0.021291	0.0530101	0.607006	0.872085	FALSE	None
TXNDC17	3	-0.288792	0.0135729	3	-0.378319	0.0915437	-0.114715	0.269878	0.706157	FALSE	None
TYRO3	3	-0.258844	0.137284	3	-0.476039	0.150841	-0.249999	0.0443391	0.388695	FALSE	None
UBA5	3	-0.193214	0.0193922	3	-0.121971	0.0537716	0.0539541	0.552484	0.862295	FALSE	None
UBE2C	3	-0.606355	0.013352	3	-1.27788	0.0120769	-0.682625	2.98475e-06	0.00075365	TRUE	None
UBE2G2	3	-0.269317	0.00916227	3	-0.00948908	0.155692	0.224945	0.0730052	0.441529	FALSE	None
UBE2H	3	-0.275692	0.0330354	3	-0.347685	0.0130226	-0.0712355	0.494118	0.837348	FALSE	None
UBE2I	3	-1.49527	0.0266931	3	-1.26545	0.169051	0.107801	0.372844	0.776438	FALSE	None
UBE2J2	3	-0.296189	0.0101706	3	-0.232225	0.0415019	0.051009	0.553713	0.862295	FALSE	None
UBE2K	3	0.258186	0.0329323	3	0.0605513	0.0166151	-0.285011	0.0228721	0.281718	TRUE	None
UBE2T	3	-0.198069	0.0109555	3	-0.180584	0.101943	-0.0066269	0.950104	0.98829	FALSE	None
UBE2V2	3	-0.181692	0.0782256	3	-0.0866274	0.0389442	0.0398476	0.777039	0.933275	FALSE	None
UCHL5	3	-0.210894	0.0666124	3	-0.242284	0.0412367	-0.0371019	0.686442	0.903685	FALSE	None
UCK1	3	-0.0750616	0.00471363	3	-0.108466	0.0158066	-0.08734	0.334508	0.758658	FALSE	None
UFSP2	3	-0.0322018	0.023552	3	0.0271012	0.00854749	0.000991787	0.991339	0.995281	FALSE	None
UGP2	3	-0.224262	0.0216798	3	-0.206548	0.0314065	-0.000934924	0.991303	0.995281	FALSE	None
UNG	3	-0.10468	0.0505084	3	-0.142675	0.00767374	-0.0799371	0.427529	0.802611	FALSE	None
UPF3A	3	-0.371664	0.0150413	3	-0.420363	0.103366	-0.0415254	0.659265	0.894186	FALSE	None
UROS	3	-0.0374175	0.0444572	3	-0.0787141	0.0270695	-0.0918951	0.437691	0.804489	FALSE	None
USP1	3	-0.335851	0.0041863	3	-0.563816	0.0260068	-0.203267	0.0449619	0.388695	FALSE	None
USP10	3	-0.589208	0.0395261	3	-0.585787	0.0321331	0.0117313	0.907383	0.97995	FALSE	None
USP14	3	0.0107977	0.0185722	3	-0.0515417	0.0148466	-0.107714	0.228986	0.667201	FALSE	None
USP15	3	-0.521914	1.24011	3	-0.524544	1.00239	-0.119841	0.201141	0.636841	FALSE	None
USP2	3	-0.15931	0.000281972	3	-0.297251	0.0476338	-0.135343	0.138546	0.544481	FALSE	None
USP28	3	-0.141041	0.0165588	3	-0.18661	0.00573795	-0.0652784	0.463421	0.821136	FALSE	None
USP30	3	-0.165992	0.0122834	3	-0.112701	0.0341113	0.0102144	0.912041	0.97995	FALSE	None
USP33	3	-0.198209	0.00451325	3	-0.318797	0.0480181	-0.115781	0.214664	0.649133	FALSE	None
USP36	3	-0.583245	0.224311	3	-0.502423	0.218891	0.0697576	0.425847	0.800942	FALSE	None
USP7	3	0.393431	0.0259061	3	0.473692	0.0538161	0.0373403	0.682485	0.903685	FALSE	None
USP9X	3	-0.201161	0.0453139	3	-0.226099	0.0637729	-0.0338285	0.712131	0.910131	FALSE	None
UXS1	3	-0.00907448	0.00593121	3	-0.0117042	0.0688401	-0.0626603	0.536599	0.856184	FALSE	None
VAC14	3	-0.200868	0.0145701	3	-0.202913	0.0857193	-0.0149734	0.899582	0.97995	FALSE	None
VAMP2	3	-0.307675	0.026851	3	-0.252749	0.107646	0.0615175	0.561272	0.863626	FALSE	None
VDAC1	3	-0.448053	0.0177976	3	-0.257486	0.014853	0.202724	0.0429451	0.388695	FALSE	None
VHL	3	-0.501977	0.0208058	3	-0.61436	0.0479739	-0.118108	0.239081	0.686001	FALSE	None
VIM	3	-0.0695517	0.00356974	3	-0.0473255	0.00124624	-0.0146976	0.87162	0.970834	FALSE	None
VKORC1L1	3	-0.148159	0.0585971	3	-0.0505255	0.0223873	0.0878094	0.417492	0.798437	FALSE	None
VMP1	3	-0.744933	0.0222812	3	-0.846526	0.0230656	-0.0884692	0.393949	0.789166	FALSE	None
VPS16	3	-0.292242	0.130878	3	-0.490385	0.166962	-0.191885	0.0870512	0.472668	FALSE	None
VPS18	3	-0.662491	0.00653439	3	-1.05391	0.00479672	-0.393702	0.000370333	0.0233773	TRUE	None
VPS45	3	-0.015596	0.00181627	3	-0.126689	0.00764864	-0.16083	0.150681	0.561578	FALSE	None
WDHD1	3	-1.17034	0.108144	3	-1.18518	0.220831	-0.114708	0.383273	0.778461	FALSE	None
WDR1	3	-0.572798	0.0119459	3	-0.196445	0.153826	0.363133	0.00725091	0.148646	TRUE	None
WDR24	3	-0.771639	0.10092	3	-0.743408	0.0466386	0.0260623	0.767351	0.929663	FALSE	None
WDR33	3	-1.99004	0.01449	3	-1.34228	0.0073264	0.472186	0.00168485	0.0567232	TRUE	None
WDR73	3	-0.373312	0.0160189	3	-0.294876	0.0342646	0.0936835	0.376872	0.778461	FALSE	None
WDR83OS	3	0.0241398	0.00970581	3	0.0724255	0.0302407	-0.0138277	0.875281	0.971466	FALSE	None
WEE1	3	-2.88204	2.15328	3	-2.66443	0.984871	0.0687695	0.716323	0.912549	FALSE	None
WIPF1	3	-0.39647	0.0931317	3	-0.342388	0.142272	0.0466954	0.614789	0.875621	FALSE	None
WNK3	3	-0.136094	0.0230018	3	-0.192322	0.0162611	-0.0575681	0.555601	0.862295	FALSE	None
WRN	3	-0.0271883	0.0153753	3	0.149429	0.00756719	0.108213	0.238702	0.686001	FALSE	None
WSB2	3	-0.379062	0.0216573	3	-0.277617	0.13283	0.119127	0.246781	0.694325	FALSE	None
WT1	3	-0.202539	0.00795249	3	-0.260635	0.0987274	-0.0644763	0.556358	0.862295	FALSE	None
WWP1	3	-0.140521	0.0759542	3	-0.0743274	0.0533826	0.0445797	0.608174	0.872522	FALSE	None
XBP1	3	-0.375663	0.0125644	3	-0.242152	0.0274482	0.136645	0.124082	0.517862	FALSE	None
XPA	3	-0.26742	0.00922742	3	-0.408207	0.0589203	-0.114496	0.207397	0.643349	FALSE	None
XPC	3	-0.233497	0.00652118	3	-0.166023	0.0519485	0.0384262	0.686499	0.903685	FALSE	None
XPNPEP3	3	-0.277252	0.0538715	3	-0.222888	0.0532698	0.0313079	0.73038	0.916065	FALSE	None
XPOT	3	-0.530728	0.0479545	3	-0.550672	0.073885	-0.00941891	0.938424	0.9873	FALSE	None
XRCC1	3	-0.136513	0.0104042	3	-0.163903	0.0859865	-0.0354371	0.759947	0.927896	FALSE	None
XRCC2	3	-0.217444	0.0794777	3	-0.0816787	0.0391748	0.0888431	0.377978	0.778461	FALSE	None
XRCC3	3	-0.716911	0.241894	3	-0.417825	0.0842458	0.281748	0.00913379	0.170836	TRUE	None
XRCC4	3	-0.0282343	0.00835798	3	0.0411645	0.0256078	0.0309235	0.731393	0.916065	FALSE	None
XRCC5	3	-1.55467	0.174911	3	-1.0137	0.156347	0.44437	0.000729018	0.0368154	TRUE	None
XRCC6	3	-1.09132	0.189961	3	-0.811222	0.16139	0.240707	0.116079	0.510424	FALSE	None
ATP23	3	-0.128325	0.0381033	3	-0.226145	0.00765815	-0.146623	0.191599	0.620506	FALSE	None
YBEY	3	-0.126476	0.0162194	3	-0.0792764	0.0468281	0.0125337	0.891142	0.978319	FALSE	None
YPEL5	3	-0.683409	0.00140973	3	-0.46537	0.0749793	0.239704	0.087423	0.472668	FALSE	None
YWHAQ	3	-0.0511251	0.00500573	3	0.0307499	0.00746017	0.0319594	0.74761	0.926486	FALSE	None
ZBTB11	3	-0.963016	0.189525	3	-0.652946	0.0440949	0.302227	0.00445614	0.115403	TRUE	None
ZBTB2	3	-0.582151	0.194537	3	-0.570041	0.243586	0.0011357	0.989901	0.995281	FALSE	None
ZBTB45	3	-0.246992	0.113515	3	-0.197776	0.0410368	0.0186385	0.853516	0.964263	FALSE	None
ZBTB7A	3	0.203072	0.0102307	3	0.137638	0.00265243	-0.128565	0.207586	0.643349	FALSE	None
ZDHHC5	3	-0.280957	0.0438106	3	-0.236135	0.000609584	0.0349268	0.726447	0.916065	FALSE	None
ZFP36L2	3	-0.264857	0.0557068	3	-0.123336	0.0126024	0.109403	0.344673	0.762685	FALSE	None
RBSN	3	-0.48891	0.177038	3	-0.317137	0.0983173	0.152911	0.16796	0.580466	FALSE	None
ZMYND8	3	-0.57647	0.1046	3	-0.481692	0.155184	0.0922648	0.323063	0.752165	FALSE	None
ZNF217	3	0.00650949	0.00166994	3	-0.0263692	0.0395838	-0.110974	0.218204	0.654508	FALSE	None
ZNF281	3	-0.0473864	0.00517215	3	0.0520128	0.0344592	0.0552855	0.549823	0.862295	FALSE	None
ZNF512	3	0.0191323	0.00338047	3	0.116297	0.0156309	0.0281819	0.758669	0.927896	FALSE	None
ZNF689	3	-0.29992	0.0196106	3	-0.000678798	0.1699	0.26724	0.016755	0.251011	TRUE	None
ZRSR2	3	-0.230449	0.0372998	3	-0.156427	0.014276	0.067711	0.586268	0.8695	FALSE	None
ZSCAN2	3	-0.146113	0.0157133	3	-0.347636	0.0750369	-0.201761	0.0578473	0.417313	FALSE	None
ZSWIM6	3	0.0617643	0.0760816	3	0.00942239	0.0397223	-0.0736237	0.51872	0.847747	FALSE	None

## Sheet: BTZ_T9
gene	n_T9_DMSO	mean_T9_DMSO	variance_T9_DMSO	n_T9_80	mean_T9_80	variance_T9_80	differential_T9_80_vs_T9_DMSO	pval_T9_80_vs_T9_DMSO	fdr_T9_80_vs_T9_DMSO	significant_T9_80_vs_T9_DMSO	effect_type_T9_80
A1BG	3	-0.263367	0.00945131	3	-0.106427	0.024208	0.106925	0.242617	0.612608	FALSE	None
ABCC1	3	0.105257	0.05722	3	0.146869	0.0402039	0.0853409	0.371359	0.717156	FALSE	None
ACACA	3	-0.741275	0.0274567	3	-0.311974	0.0040514	0.287154	0.0175988	0.206683	TRUE	None
ACO2	3	-0.241829	0.233972	3	-0.135203	0.0627954	0.07231	0.544376	0.846598	FALSE	None
ACTB	3	0.755448	0.0267029	3	0.258891	0.0155435	-0.376078	0.000710767	0.0333049	TRUE	None
ACTG1	3	0.516814	0.0128865	3	0.385268	0.0027757	-0.0177593	0.843255	0.955878	FALSE	None
ACTR1A	3	-0.63578	0.251184	3	-1.04906	0.0166242	-0.595773	0.000176314	0.0127198	TRUE	None
ACTR1B	3	-0.939385	1.00235	3	-0.725438	0.623919	0.0403079	0.753063	0.941403	FALSE	None
AGK	3	-0.125538	0.105646	3	0.0301051	0.167639	0.143706	0.145516	0.505056	FALSE	None
AHCYL1	3	-0.234224	0.00526915	3	-0.502691	0.0270295	-0.37872	0.00624736	0.131455	TRUE	None
AKIRIN1	3	-0.466823	0.0571217	3	-0.77978	0.0334445	-0.466786	0.000388922	0.0228701	TRUE	None
AKT1	3	-0.0672293	0.0177243	3	-0.12208	0.0223327	-0.072923	0.378472	0.72397	FALSE	None
AKT3	3	-0.0444579	0.00696957	3	-0.0145009	0.00108638	0.0433211	0.690336	0.906532	FALSE	None
ALDH18A1	3	-0.168777	0.0267439	3	-0.0993523	0.00950046	0.0350301	0.760432	0.9418	FALSE	None
ALG12	3	-0.233487	0.0737645	3	-0.341464	0.0137057	-0.18034	0.0916345	0.430658	FALSE	None
ALG6	3	-0.461151	0.125769	3	-0.367091	0.0436545	-0.0133179	0.917846	0.982585	FALSE	None
ALG8	3	-0.651772	0.0895203	3	-0.4134	0.046932	0.101725	0.341838	0.693286	FALSE	None
ALG9	3	-0.503017	0.0592048	3	-0.519139	0.0158945	-0.150965	0.238039	0.612608	FALSE	None
ALK	3	-0.851201	1.94919	3	-0.723072	1.54493	0.0185369	0.861814	0.961804	FALSE	None
ALKBH1	3	-0.183358	0.0128605	3	-0.143084	0.0213161	-0.00414746	0.971459	0.996116	FALSE	None
AMOT	3	-0.241412	0.0824652	3	-0.136815	0.0344567	0.0546565	0.660324	0.889778	FALSE	None
ANAPC5	3	-1.62783	2.42506	3	-1.76374	1.6503	-0.461763	0.0181993	0.21128	TRUE	None
ANKDD1A	3	-0.210563	0.030395	3	-0.314964	0.0198159	-0.184142	0.096365	0.430658	FALSE	None
ANKRD11	3	-0.756798	0.199504	3	-0.355881	0.117341	0.279863	0.0381825	0.298999	TRUE	None
ANP32B	3	-0.228127	0.0400361	3	-0.133673	0.267917	0.0510501	0.707633	0.914675	FALSE	None
AP2S1	3	-0.560139	0.0654208	3	-0.700156	0.00239526	-0.29611	0.0474286	0.330365	FALSE	None
APC	3	0.331804	0.00785189	3	0.473126	0.0225838	0.24662	0.0128393	0.190701	TRUE	None
APC2	3	0.0194173	0.190337	3	0.0310899	0.0197362	0.0244493	0.816538	0.94829	FALSE	None
APEX1	3	-0.340403	0.0674833	3	-0.141528	0.0318888	0.125697	0.351358	0.699944	FALSE	None
ARF1	3	-1.2823	0.0412975	3	-1.02033	0.0180371	0.0455802	0.734309	0.931723	FALSE	None
ARF4	3	-2.94783	0.33971	3	-3.47222	0.140825	-1.1294	0.000105203	0.00906363	TRUE	Negative
ARGLU1	3	-0.773595	0.0367837	3	-0.638464	0.199411	-0.014858	0.920322	0.982585	FALSE	None
ARHGAP5	3	-0.804834	0.343064	3	-0.60301	0.301793	0.0367249	0.757783	0.941403	FALSE	None
ARID1A	3	-0.478486	0.155987	3	-0.483859	0.0843051	-0.120926	0.263554	0.638627	FALSE	None
ARID1B	3	-0.463132	0.016031	3	-0.458962	0.0412152	-0.122697	0.307382	0.665945	FALSE	None
ARID2	3	-0.921081	0.329767	3	-0.565039	0.161455	0.211846	0.0702668	0.37886	FALSE	None
ARID3B	3	-0.227811	0.160063	3	-0.366867	0.100918	-0.218342	0.0672585	0.37886	FALSE	None
ASNS	3	-0.139362	0.0371122	3	-0.0535978	0.0160547	0.062891	0.54484	0.846598	FALSE	None
ATAD3A	3	-0.572226	0.0108306	3	-0.219559	0.026668	0.234177	0.0652511	0.37886	FALSE	None
ATAD5	3	-0.939273	0.0157112	3	-0.622871	0.0385699	0.140854	0.199101	0.576195	FALSE	None
ATG9A	3	0.160054	0.1641	3	0.177241	0.0950063	0.0620344	0.589538	0.859211	FALSE	None
ATM	3	-0.348792	0.0215058	3	-0.265093	0.0112323	-0.0191492	0.853037	0.95965	FALSE	None
ATP2B1	3	-0.306539	0.00390004	3	-0.166023	0.00633144	0.0678131	0.515472	0.830735	FALSE	None
ATP2C1	3	-0.175569	0.0197566	3	-0.205784	0.0357889	-0.0901717	0.43889	0.773026	FALSE	None
ATP9A	3	-0.00467713	0.0107006	3	-0.244404	0.0213205	-0.266716	0.0240561	0.23589	TRUE	None
ATP9B	3	-0.10127	0.0399754	3	0.00313393	0.000112566	0.106558	0.257107	0.628761	FALSE	None
ATR	3	-2.01255	1.17787	3	-1.59056	0.904069	0.102257	0.43486	0.773026	FALSE	None
ATRIP	3	-1.05074	0.718703	3	-0.853358	0.237569	0.0042938	0.977799	0.996887	FALSE	None
ATRX	3	-1.40384	0.0936192	3	-1.01504	0.0397104	0.171401	0.11985	0.475393	FALSE	None
AUP1	3	-1.40183	0.743435	3	-0.999303	1.0289	0.184902	0.344254	0.695393	FALSE	None
B3GNT2	3	-0.458587	0.00444353	3	-0.337286	0.00734046	-0.00947051	0.930005	0.982678	FALSE	None
BABAM1	3	0.140215	0.0148787	3	0.190803	0.00250523	0.116919	0.206005	0.587133	FALSE	None
BAK1	3	-0.773938	0.178112	3	-0.922844	0.115062	-0.315895	0.0198383	0.219218	TRUE	None
BAP1	3	-2.05497	0.243217	3	-1.27655	0.00281985	0.485025	0.00224302	0.06865	TRUE	None
BARD1	3	-1.47815	0.0132801	3	-1.09231	0.0045068	0.167039	0.334547	0.684452	FALSE	None
BAX	3	-0.0468073	0.0258322	3	-0.0384893	0.00854422	0.0105445	0.931112	0.982678	FALSE	None
BCL2	3	0.0358465	0.00516068	3	-0.023473	0.0194416	-0.0402142	0.720412	0.919869	FALSE	None
BCL2L2	3	-0.157938	0.0444696	3	-0.0460176	0.038086	0.0989365	0.413223	0.751992	FALSE	None
BIRC6	3	-1.64053	0.0323107	3	-1.31929	0.0760736	0.0688479	0.68255	0.904229	FALSE	None
BLM	3	-0.205773	0.227749	3	-0.221232	0.0120714	-0.0585863	0.672173	0.899198	FALSE	None
BMI1	3	0.159827	0.018067	3	0.178865	0.0338033	0.0805564	0.457828	0.789627	FALSE	None
BMPR1A	3	-0.107861	0.034107	3	-0.00716503	0.0218635	0.0856513	0.300614	0.664546	FALSE	None
BOLA3	3	-0.2513	0.0521925	3	-0.0256782	0.0122785	0.181027	0.0954116	0.430658	FALSE	None
BPTF	3	-0.846501	0.066899	3	-0.690161	0.0292017	-0.0175	0.884121	0.969581	FALSE	None
BRAF	3	-0.344748	0.0147583	3	-0.25686	0.00390169	0.00451581	0.967047	0.995635	FALSE	None
BRCA1	3	-0.928873	0.187061	3	-0.87624	0.00460245	-0.134067	0.353798	0.703417	FALSE	None
BRCA2	3	-0.46934	0.00895688	3	-0.420302	0.00515074	-0.0825325	0.400771	0.74353	FALSE	None
BRD1	3	0.396306	0.040065	3	0.362592	0.00425131	0.0694355	0.5536	0.847534	FALSE	None
BRD4	3	-0.914634	0.0991698	3	-0.653148	0.0243056	0.0828114	0.464689	0.794396	FALSE	None
BRD7	3	-0.69415	0.0178537	3	-0.228597	0.0107332	0.337002	0.00683871	0.13778	TRUE	None
BRINP3	3	0.0516478	0.02517	3	0.0354928	9.95716e-05	0.01366	0.871237	0.964857	FALSE	None
BRIP1	3	-0.504351	0.0219557	3	-0.207218	0.0456414	0.202827	0.120496	0.475393	FALSE	None
BRMS1	3	-0.253841	0.0154541	3	-0.0716704	0.00901554	0.135206	0.241808	0.612608	FALSE	None
BRPF1	3	-0.409651	0.0201422	3	-0.207003	0.0409658	0.126455	0.32948	0.68116	FALSE	None
EMSY	3	-0.358636	0.03058	3	-0.378822	0.0296667	-0.122071	0.274753	0.647972	FALSE	None
MTRFR	3	-0.153314	0.0663156	3	-0.248323	0.0894209	-0.14997	0.18523	0.550243	FALSE	None
C19orf53	3	-1.04605	0.0515039	3	-0.582629	0.0961176	0.285246	0.0316207	0.265696	TRUE	None
C1orf115	3	-0.0114607	0.0351734	3	-0.000737479	0.0435133	0.0241254	0.822722	0.94829	FALSE	None
C22orf39	3	-0.178253	0.0943337	3	-0.220982	0.00980204	-0.107284	0.365469	0.715356	FALSE	None
C6orf136	3	-0.238853	0.0900716	3	-0.191124	0.00329828	-0.0126853	0.909536	0.980396	FALSE	None
C7orf26	3	-1.07461	0.108675	3	-0.56416	0.0262552	0.336531	0.0509662	0.336419	FALSE	None
FMC1-LUC7L2	3	-0.242693	0.027852	3	-0.251917	0.0243733	-0.0723252	0.52936	0.836488	FALSE	None
PAXX	3	-0.20803	0.118877	3	0.00543232	0.0171535	0.191278	0.148642	0.508912	FALSE	None
CAB39	3	0.712671	0.0695349	3	0.606341	0.0683621	0.0376617	0.710128	0.914675	FALSE	None
CABIN1	3	-0.372026	0.00267723	3	-0.87035	0.0463551	-0.649302	3.78343e-06	0.0010678	TRUE	None
CAP1	3	-0.416007	0.0541306	3	-0.45317	0.00334959	-0.159411	0.221644	0.59713	FALSE	None
CBS	3	-0.0781825	0.0169936	3	0.0116607	0.0070583	0.0947943	0.250273	0.619549	FALSE	None
CCAR2	3	-0.623874	0.524265	3	-0.571112	0.265251	-0.0759466	0.438545	0.773026	FALSE	None
SGF29	3	-0.766883	0.030771	3	-0.293297	0.0455592	0.333775	0.00421084	0.101261	TRUE	None
CCDC51	3	-0.0615684	0.129045	3	-0.0139109	0.0691414	0.0400925	0.736471	0.932821	FALSE	None
CCNA2	3	-3.6448	1.23648	3	-2.63096	0.381959	0.359919	0.231418	0.603959	FALSE	None
CCNC	3	0.414575	0.0114507	3	-0.199472	0.0784025	-0.5628	8.98409e-05	0.00906363	TRUE	None
CCND1	3	-3.23213	0.844433	3	-2.66204	0.942985	-0.0502043	0.832635	0.949166	FALSE	None
CCND3	3	-0.472237	0.0146105	3	-0.386841	0.0120243	-0.0404194	0.755653	0.941403	FALSE	None
CCNE1	3	0.0508575	0.0330467	3	-0.140119	0.00837432	-0.186336	0.115424	0.471976	FALSE	None
CCNO	3	-0.246105	0.162554	3	-0.281175	0.0862765	-0.0916844	0.404715	0.748402	FALSE	None
CCS	3	-0.352761	0.0266761	3	-0.109584	0.015389	0.18511	0.101806	0.442994	FALSE	None
CD44	3	-0.41971	0.190466	3	-0.406359	0.0784775	-0.0867959	0.348692	0.696546	FALSE	None
CD46	3	-0.0884477	0.0083709	3	0.016958	0.000826485	0.108996	0.268904	0.643581	FALSE	None
CD55	3	-0.00337425	0.0352824	3	-0.0295383	0.00375009	-0.01463	0.868805	0.964278	FALSE	None
CD59	3	-0.218227	0.0228185	3	-0.107654	0.000269843	0.0725768	0.447008	0.781103	FALSE	None
CDC25A	3	-0.141969	0.016533	3	-0.294061	0.126903	-0.209459	0.140606	0.497527	FALSE	None
CDC40	3	-2.40489	0.157578	3	-2.51839	0.0723464	-0.494656	0.0166273	0.2048	TRUE	None
CDC42	3	-2.44076	4.89136	3	-1.80441	1.42795	0.259162	0.23287	0.604624	FALSE	None
CDC45	3	-3.53107	3.51287	3	-2.76802	1.1966	0.0277901	0.932229	0.98283	FALSE	None
CDK11A	3	-1.7816	0.0543297	3	-2.10679	0.694704	-0.653151	0.0152997	0.194062	TRUE	None
CDK13	3	0.591093	0.0183932	3	0.321835	0.00898374	-0.155392	0.112984	0.467392	FALSE	None
CDK4	3	-2.18634	0.260932	3	-2.13716	0.0101383	-0.291116	0.139245	0.496953	FALSE	None
CDK5	3	-0.265262	0.120915	3	-0.0173584	0.0260109	0.206711	0.0951022	0.430658	FALSE	None
CDK6	3	-0.95594	0.575827	3	-0.596585	0.0410925	0.198326	0.3208	0.677692	FALSE	None
CDKN1B	3	0.34277	0.0131689	3	0.447179	0.0237648	0.204752	0.0436892	0.317473	FALSE	None
CDKN2A	3	0.276578	0.00208604	3	0.232408	8.7015e-05	0.043295	0.636049	0.883645	FALSE	None
CDKN2B	3	0.25553	0.048128	3	0.157711	0.00850772	-0.0320344	0.690121	0.906532	FALSE	None
CDS2	3	-2.0112	0.488055	3	-2.21389	1.12777	-0.564856	0.0142994	0.192847	TRUE	None
CDX2	3	-0.0291778	0.0595082	3	-0.0329741	0.0290582	-0.00252793	0.976844	0.996887	FALSE	None
CELF1	3	-0.298027	0.141392	3	-0.41241	0.0244168	-0.201343	0.224395	0.59713	FALSE	None
CELSR2	3	-0.33484	0.0211026	3	-0.303655	0.0213036	-0.0598812	0.567705	0.847534	FALSE	None
CHD1L	3	-0.0044819	0.0490523	3	0.126062	0.0056064	0.164	0.0805315	0.39871	FALSE	None
CHD2	3	-0.252537	0.0358681	3	-0.0603915	0.0249574	0.152695	0.116996	0.472665	FALSE	None
CHD4	3	-0.927436	0.177719	3	-0.670827	0.167227	0.0896162	0.318293	0.67712	FALSE	None
CHD8	3	0.209738	0.0705334	3	-0.468275	0.0048066	-0.70204	2.88224e-05	0.00415866	TRUE	Negative
CHEK1	3	-3.62512	9.2146	3	-2.6841	5.04841	-0.0566749	0.809608	0.94829	FALSE	None
CHEK2	3	-0.267724	0.00395278	3	-0.306996	0.0405688	-0.130154	0.244418	0.615615	FALSE	None
CHMP5	3	-1.84819	0.191815	3	-1.58465	0.174155	-0.0201882	0.890531	0.971302	FALSE	None
CHTF18	3	-0.330309	0.0492972	3	-0.438866	0.0493869	-0.219389	0.0801407	0.39871	FALSE	None
CIT	3	-0.36054	0.046784	3	-0.312254	0.074838	-0.0527344	0.737021	0.932821	FALSE	None
CLPP	3	-0.0319439	0.0111661	3	-0.199671	0.0591216	-0.185804	0.167726	0.534734	FALSE	None
CLPX	3	-0.150861	0.0503951	3	-0.195005	0.0119855	-0.0882526	0.28906	0.662013	FALSE	None
CLSPN	3	-0.570249	0.0370101	3	-0.663116	0.0113912	-0.237148	0.120311	0.475393	FALSE	None
COIL	3	-0.627859	0.0481786	3	-0.278201	0.00994867	0.222141	0.0371012	0.298999	TRUE	None
COMMD8	3	-0.553524	0.00476313	3	-0.343572	0.0107201	0.0808872	0.366992	0.715609	FALSE	None
COQ2	3	-0.199596	0.0796452	3	-0.0494224	0.0444147	0.13518	0.170655	0.534734	FALSE	None
COQ7	3	-0.111294	0.00512237	3	-0.118035	0.0291464	-0.0270493	0.809797	0.94829	FALSE	None
COX5A	3	-0.555645	0.118999	3	-0.719602	0.276954	-0.294523	0.0459404	0.325512	FALSE	None
CPD	3	-0.188038	0.0775739	3	-0.0358654	0.0502531	0.131756	0.22891	0.601866	FALSE	None
CPOX	3	-0.331528	0.0249677	3	-0.405857	0.00360089	-0.184776	0.12943	0.489807	FALSE	None
CRABP2	3	-0.0540224	0.0194952	3	0.0581184	0.00688177	0.137976	0.21918	0.59713	FALSE	None
CRAMP1	3	0.0273091	0.0106094	3	-0.00974413	0.0154254	-0.0173666	0.832055	0.949166	FALSE	None
CREBBP	3	-0.262486	0.29674	3	0.0521921	0.0564041	0.304825	0.0308023	0.265696	TRUE	None
CS	3	-0.359265	0.0896291	3	-0.357542	0.0118033	-0.0977625	0.412035	0.751992	FALSE	None
CSK	3	-0.604857	0.00224073	3	-0.548014	0.0836156	-0.0754092	0.538712	0.840958	FALSE	None
CSNK2A2	3	-0.592421	0.0320016	3	-0.39469	0.0157751	0.0614291	0.66208	0.889778	FALSE	None
CTDNEP1	3	-1.31256	0.487599	3	-1.36324	0.106624	-0.276924	0.100646	0.442994	FALSE	None
CTNNA1	3	-0.0314487	0.0642916	3	0.0611948	0.0910246	0.102854	0.33534	0.684452	FALSE	None
CTNNB1	3	-0.333793	0.0419897	3	-0.419906	0.278809	-0.178232	0.240724	0.612608	FALSE	None
CUL4A	3	0.0620092	0.00258131	3	-0.0286413	0.000648453	-0.0629918	0.476782	0.802922	FALSE	None
CUL5	3	0.925124	0.00669994	3	0.788826	0.0223538	0.0409409	0.626289	0.883645	FALSE	None
TASL	3	-0.16308	0.0294796	3	-0.0523846	0.0347717	0.0910191	0.436822	0.773026	FALSE	None
CFAP47	3	-0.280405	0.0304096	3	-0.0878255	0.00635806	0.140888	0.26755	0.643581	FALSE	None
BCLAF3	3	-0.0962317	0.0178038	3	0.00964748	0.0307005	0.100808	0.275083	0.647972	FALSE	None
LINC01560	3	0.0960116	0.0434055	3	-0.0995178	0.00388537	-0.169607	0.125073	0.486247	FALSE	None
H2AP	3	-0.118463	0.0201673	3	-0.0309248	0.0248357	0.0816144	0.412991	0.751992	FALSE	None
LINC01545	3	-0.300217	0.0127307	3	-0.16011	0.00825106	0.0747998	0.415576	0.754913	FALSE	None
DIPK2B	3	-0.217448	0.0638811	3	-0.174751	0.00369594	-0.00870907	0.933956	0.982996	FALSE	None
CXXC1	3	0.231487	0.105037	3	-0.282278	0.0647607	-0.513581	0.000238982	0.015442	TRUE	None
CYB5B	3	-0.432839	0.0761438	3	-0.264253	0.0464493	0.0814612	0.514877	0.830735	FALSE	None
CYB5R4	3	-0.47295	0.244065	3	-0.0530544	0.00546095	0.356059	0.0104701	0.165232	TRUE	None
DAPK3	3	0.24951	0.0154837	3	0.293186	0.0211708	0.130673	0.254069	0.625878	FALSE	None
DAXX	3	-0.273044	0.0529517	3	-0.402916	0.0289278	-0.20784	0.220831	0.59713	FALSE	None
DAZAP1	3	-0.119374	0.131917	3	-0.448626	0.633819	-0.371049	0.0491416	0.333107	FALSE	None
DBF4	3	-0.757415	0.0312413	3	-0.627028	0.0313852	-0.030714	0.780265	0.9418	FALSE	None
DCLRE1A	3	-0.0818759	0.0978785	3	-0.0187829	0.0120993	0.0559547	0.658764	0.889778	FALSE	None
DCLRE1B	3	-0.479249	0.0854463	3	-0.447064	0.00176785	-0.0955075	0.435145	0.773026	FALSE	None
DCLRE1C	3	-0.365778	0.0282254	3	-0.150043	0.055121	0.143312	0.229424	0.601866	FALSE	None
DCTN1	3	-0.949215	0.437251	3	-0.901165	0.185688	-0.110925	0.64299	0.884955	FALSE	None
DCTN3	3	-1.81253	0.748497	3	-1.53155	0.183996	0.00618461	0.973565	0.996887	FALSE	None
DDB1	3	-1.7153	0.790014	3	-1.52485	0.407943	-0.0786721	0.621722	0.8807	FALSE	None
DDB2	3	-0.270127	0.0510473	3	-0.234404	0.0103774	-0.0409692	0.729249	0.928497	FALSE	None
DDI2	3	-0.453916	0.0250138	3	-1.36156	0.0677494	-1.08763	2.5369e-08	2.56227e-05	TRUE	Negative
DDX5	3	-0.411473	0.0208387	3	0.0300375	0.00940459	0.388412	0.000604275	0.0316496	TRUE	None
DET1	3	-0.202331	0.035871	3	-0.188489	0.00228499	-0.0475058	0.580034	0.851228	FALSE	None
DHX29	3	0.189408	0.0166543	3	0.43132	0.025732	0.332917	0.00129633	0.0478655	TRUE	None
DHX35	3	-0.722746	0.0743571	3	-0.504559	0.0416814	0.0654157	0.450893	0.785175	FALSE	None
DIAPH1	3	-0.317625	0.00867579	3	-0.222716	0.0111479	0.0146784	0.847265	0.958263	FALSE	None
DIS3L	3	-0.232664	0.00270309	3	-0.437752	0.095918	-0.302909	0.0170238	0.205065	TRUE	None
DNA2	3	-2.36549	0.361977	3	-2.11528	0.411679	-0.119022	0.505414	0.823336	FALSE	None
DNAJB5	3	-0.124643	0.00295594	3	-0.0949825	0.0273126	0.000822674	0.992915	0.996887	FALSE	None
DNMT3A	3	-0.122511	0.0116741	3	-0.174571	0.00497625	-0.0881035	0.355562	0.705535	FALSE	None
DOCK2	3	-0.0257219	0.0374531	3	0.015872	0.00484085	0.0629492	0.601867	0.870897	FALSE	None
DOT1L	3	0.346467	0.0624255	3	-0.108783	0.0106103	-0.409565	0.00254634	0.07348	TRUE	None
DPF2	3	-0.998444	0.0787269	3	-0.730578	0.0338475	0.0846063	0.45814	0.789627	FALSE	None
DPM2	3	-0.651257	0.55947	3	-0.699852	0.307746	-0.192667	0.179978	0.546474	FALSE	None
DVL3	3	-0.194413	0.0336853	3	-0.330523	0.0764861	-0.204149	0.126434	0.489267	FALSE	None
DYRK1A	3	0.913343	0.303575	3	1.01106	0.154048	0.313219	0.00997005	0.159837	TRUE	None
E2F3	3	-0.714153	0.123063	3	-0.878272	0.0201767	-0.327908	0.0956117	0.430658	FALSE	None
E2F7	3	-0.0603225	0.000351391	3	-0.794497	0.11513	-0.847621	5.05036e-06	0.0010678	TRUE	Negative
ECSIT	3	-0.0520722	0.0659855	3	0.0730488	0.0423064	0.140934	0.224586	0.59713	FALSE	None
EDC3	3	-0.831463	0.317031	3	-0.597278	0.0497646	0.0782394	0.597114	0.865259	FALSE	None
EDF1	3	-0.263085	0.188221	3	-0.319194	0.191719	-0.126322	0.302365	0.664546	FALSE	None
EED	3	-0.191512	0.117608	3	-0.199713	0.111702	-0.0511756	0.67627	0.902568	FALSE	None
EEFSEC	3	-0.935235	0.347095	3	-0.14664	0.128093	0.683908	7.74969e-05	0.00906363	TRUE	None
EGFR	3	0.0200654	0.0482644	3	0.0105597	0.0526418	0.00618123	0.952473	0.988876	FALSE	None
EHMT2	3	-0.341811	0.0360151	3	-0.410395	0.0255076	-0.171129	0.102144	0.442994	FALSE	None
EIF2AK4	3	0.244449	0.0581456	3	0.0565169	0.0449595	-0.131484	0.330864	0.68116	FALSE	None
EIF2S1	3	-4.43551	0.280155	3	-3.79348	0.135748	-0.408158	0.177713	0.546474	FALSE	None
EIF3I	3	-3.2876	0.358805	3	-3.15937	0.127778	-0.455607	0.0605946	0.375463	FALSE	None
EIF4A1	3	-3.07205	0.201776	3	-2.32604	0.146543	0.297637	0.137961	0.495875	FALSE	None
EIF4B	3	-1.04966	0.565069	3	-0.803077	0.325491	0.0979186	0.455721	0.789146	FALSE	None
EIF4ENIF1	3	-1.35774	0.0565627	3	-1.07546	0.0131975	0.0477673	0.710521	0.914675	FALSE	None
EIF4G1	3	-1.21045	0.415329	3	-0.864341	0.107652	0.147475	0.34414	0.695393	FALSE	None
EIF4H	3	-0.487388	0.0059366	3	-0.30783	0.000641083	0.0744921	0.439324	0.773026	FALSE	None
ELAVL1	3	-0.724172	0.0810392	3	-0.577963	0.0107015	-0.00855964	0.94151	0.985771	FALSE	None
ELF2	3	-0.532255	0.0748913	3	-0.455961	0.0130509	-0.0550881	0.608828	0.87359	FALSE	None
ELMO1	3	-0.0183955	0.124428	3	-0.0767041	0.0164336	-0.0669264	0.552423	0.847534	FALSE	None
EME1	3	-0.210268	0.0192061	3	-0.175337	0.00881037	-0.0124411	0.891365	0.971302	FALSE	None
EP300	3	0.53957	0.0150499	3	0.736127	0.02757	0.343557	0.000725454	0.0333049	TRUE	None
EPC2	3	-0.509269	0.0228825	3	-0.482002	0.0417574	-0.0989558	0.3575	0.706983	FALSE	None
EPHA7	3	-0.0705396	0.0613364	3	-0.0436864	0.0102613	0.0222797	0.815251	0.94829	FALSE	None
ERBB2	3	-0.365633	0.175688	3	-0.13755	0.0594815	0.169674	0.076477	0.39409	FALSE	None
ERBB3	3	-0.0495014	0.0250778	3	-0.15417	0.0260598	-0.117621	0.305065	0.665433	FALSE	None
ERCC1	3	-0.407106	0.0229219	3	-0.195446	0.0160534	0.124104	0.275618	0.647972	FALSE	None
ERCC2	3	-1.41256	0.0114742	3	-1.14137	0.207799	0.0487618	0.780808	0.9418	FALSE	None
ERCC4	3	-0.113271	0.0736417	3	-0.10044	0.0290547	-0.00794665	0.93824	0.985055	FALSE	None
ERCC6	3	-0.178478	0.0843525	3	0.0893437	0.0269226	0.263077	0.0419749	0.314034	FALSE	None
ERCC8	3	-0.187333	0.0656893	3	-0.194259	0.0324981	-0.0559402	0.579603	0.851228	FALSE	None
ERG	3	-0.0511993	0.0143413	3	0.0825454	0.0157466	0.157207	0.0691747	0.37886	FALSE	None
ETFA	3	-0.180727	0.0320463	3	-0.219957	0.0179124	-0.0872477	0.320853	0.677692	FALSE	None
ETV1	3	-0.236594	0.0584935	3	-0.246977	0.13558	-0.0838155	0.436735	0.773026	FALSE	None
EXO1	3	-0.0934011	0.024466	3	-0.0406141	0.00968956	0.044976	0.649662	0.88682	FALSE	None
EXT1	3	0.52875	0.0254742	3	0.353187	0.0541965	-0.0698554	0.552442	0.847534	FALSE	None
EXT2	3	0.152388	0.0282054	3	0.122842	0.0378346	0.0201507	0.822943	0.94829	FALSE	None
EXTL3	3	0.339728	0.0461242	3	0.37004	0.00304968	0.127086	0.23251	0.604624	FALSE	None
EZH2	3	-0.00777091	0.00534896	3	0.068941	0.00946426	0.100804	0.276511	0.647972	FALSE	None
F2R	3	-0.20716	0.0529317	3	-0.153683	0.0584829	0.0109102	0.935306	0.982996	FALSE	None
FAM111A	3	-0.0793974	0.0477851	3	-0.0634443	0.0698406	0.00086552	0.993719	0.996887	FALSE	None
FAM111B	3	0.00500452	0.0183696	3	0.0132416	0.00886575	0.0237535	0.788855	0.9418	FALSE	None
FAM136A	3	-0.404188	0.0324385	3	-0.220116	0.0567606	0.0940786	0.29345	0.664546	FALSE	None
ABRAXAS1	3	-0.298972	0.0515044	3	-0.22515	0.013224	0.00474645	0.971188	0.996116	FALSE	None
SHLD2	3	-0.5415	0.00191206	3	-0.483295	0.0799689	-0.0822976	0.454401	0.789146	FALSE	None
TENT5C	3	-0.195025	0.0173527	3	-0.0826114	0.00766999	0.0761865	0.477758	0.802922	FALSE	None
SINHCAF	3	-0.789144	0.470007	3	-1.02173	0.706067	-0.392481	0.00179724	0.0567255	TRUE	None
FAN1	3	-0.261486	0.014655	3	-0.245232	0.0178313	-0.056456	0.538009	0.840958	FALSE	None
FANCA	3	-0.120835	0.0273586	3	-0.161558	0.0437557	-0.0763717	0.517902	0.830735	FALSE	None
FANCB	3	-0.201774	0.00778875	3	0.0347556	0.011158	0.22737	0.0306743	0.265696	TRUE	None
FANCC	3	-0.338324	0.0260158	3	-0.211744	0.00104535	0.0482808	0.628818	0.883645	FALSE	None
FANCD2	3	-0.683383	0.115985	3	-0.523165	0.0168763	0.0177669	0.894298	0.972272	FALSE	None
FANCD2OS	3	-0.19549	0.0364934	3	0.0490887	0.0312588	0.222818	0.0197422	0.219218	TRUE	None
FANCE	3	-0.401799	0.0240965	3	-0.267602	0.00569435	0.0362639	0.685289	0.904229	FALSE	None
FANCF	3	-0.280557	0.029848	3	-0.253251	0.00955765	-0.0613635	0.561167	0.847534	FALSE	None
FANCG	3	-0.386694	0.0606847	3	-0.157082	0.0576465	0.159466	0.213792	0.594341	FALSE	None
FANCI	3	-0.534694	0.0524119	3	-0.348132	0.0740554	0.0697329	0.580689	0.851228	FALSE	None
FANCL	3	-0.433335	0.0768832	3	-0.265019	0.0433884	0.0754276	0.573193	0.847534	FALSE	None
FANCM	3	-0.286354	0.0594958	3	-0.257873	0.118523	-0.0415706	0.670855	0.898625	FALSE	None
FASN	3	-0.617037	0.00915475	3	-0.289331	0.0152641	0.19971	0.043308	0.317473	FALSE	None
FASTKD1	3	-0.111364	0.0154412	3	-0.0297377	0.00955501	0.0731002	0.392814	0.737753	FALSE	None
FBRSL1	3	-0.434743	0.10581	3	-0.397445	0.0642355	-0.0649794	0.58003	0.851228	FALSE	None
FBXW7	3	0.460841	0.005758	3	0.515171	0.0120614	0.173907	0.0744704	0.393507	FALSE	None
FDX1	3	-0.637324	0.0646464	3	-0.429137	0.0432225	0.0721329	0.536123	0.83951	FALSE	None
FDX2	3	-1.45507	0.412774	3	-1.21314	0.431043	0.0212604	0.8821	0.969446	FALSE	None
FECH	3	-0.322454	0.0236443	3	-0.195033	0.050842	0.051216	0.594701	0.863	FALSE	None
FEM1B	3	-0.117949	0.0187736	3	-0.330273	0.0341272	-0.275107	0.058678	0.368104	FALSE	None
FEN1	3	-0.943098	0.0272156	3	-0.645563	0.0359354	0.119098	0.22383	0.59713	FALSE	None
FGFR1	3	-0.0977762	0.0579003	3	-0.216368	0.00359213	-0.156576	0.19904	0.576195	FALSE	None
FGFR2	3	0.0238096	0.056166	3	-0.0965128	0.0247861	-0.113053	0.285786	0.659005	FALSE	None
FGFR3	3	0.243178	0.0173466	3	0.15967	0.0118131	-0.00438102	0.966769	0.995635	FALSE	None
FGFR4	3	-0.282136	0.0165714	3	-0.0427633	0.00939537	0.208512	0.133815	0.495875	FALSE	None
FH	3	-0.162924	0.00435849	3	0.0311589	0.0110891	0.189777	0.0804435	0.39871	FALSE	None
FIBP	3	-0.166521	0.0224473	3	-0.134928	0.136058	-0.00388384	0.977906	0.996887	FALSE	None
FLCN	3	-0.257872	0.0394876	3	-0.749354	0.00168416	-0.629113	5.28613e-06	0.0010678	TRUE	None
FLNB	3	-0.26375	0.0605017	3	-0.0873467	0.00275098	0.132569	0.239124	0.612608	FALSE	None
FOSL1	3	-1.36419	1.7924	3	-1.08076	0.584129	0.0868261	0.547005	0.847355	FALSE	None
FOXA1	3	-0.102307	0.0656642	3	-0.328604	0.00451162	-0.283733	0.0117348	0.176897	TRUE	None
FOXK1	3	-0.530805	0.122551	3	-0.298551	0.00850091	0.116866	0.316579	0.67712	FALSE	None
FOXM1	3	-1.13474	0.333779	3	-1.01985	0.455165	-0.102194	0.526279	0.834446	FALSE	None
FPGS	3	-0.138692	0.110235	3	0.0202626	0.00546002	0.150885	0.215964	0.594341	FALSE	None
MRM2	3	-0.109714	0.0566957	3	-0.254541	0.00171033	-0.188324	0.0618955	0.377863	FALSE	None
FURIN	3	-0.647459	0.0470521	3	-0.451282	0.0571143	0.0488297	0.67844	0.902568	FALSE	None
FZD1	3	-0.212785	0.0589379	3	-0.019914	0.0237837	0.17525	0.10112	0.442994	FALSE	None
FZD10	3	-0.227704	0.0281417	3	0.0724842	0.0382296	0.289342	0.0077801	0.140733	TRUE	None
FZD2	3	-0.437803	0.0102497	3	-0.219924	0.0278012	0.121071	0.242355	0.612608	FALSE	None
FZD3	3	-0.130924	0.11561	3	0.0112647	0.00384611	0.134287	0.216873	0.595223	FALSE	None
FZD4	3	-0.370026	0.030518	3	-0.115433	0.0475837	0.183426	0.0674713	0.37886	FALSE	None
FZD5	3	-0.239153	0.0116664	3	-0.0777216	0.0270414	0.122501	0.30525	0.665433	FALSE	None
FZD6	3	-0.177056	0.0160538	3	-0.0439009	0.0183159	0.110441	0.323669	0.679638	FALSE	None
FZD7	3	0.00738557	0.0316592	3	-0.0099264	0.0168978	0.00569326	0.957257	0.991532	FALSE	None
FZD8	3	-0.340963	0.0425095	3	-0.123128	0.0171902	0.153973	0.0901196	0.429343	FALSE	None
FZD9	3	-0.11064	0.00766131	3	-0.115757	0.0194259	-0.0299542	0.787767	0.9418	FALSE	None
G6PD	3	-0.649425	0.0794014	3	-0.418432	0.00400597	0.0915934	0.502532	0.821932	FALSE	None
GANAB	3	-0.446892	0.101843	3	-0.254866	0.0406904	0.106429	0.284773	0.658526	FALSE	None
GATA3	3	-0.000674322	0.0785095	3	0.0118474	0.00287311	0.025696	0.820988	0.94829	FALSE	None
GATAD1	3	-0.437463	0.0630728	3	-0.394029	0.0210011	-0.0692247	0.630322	0.883645	FALSE	None
GCLC	3	-0.269255	0.0469115	3	-0.204263	0.0297552	0.0078706	0.930171	0.982678	FALSE	None
GCLM	3	-0.118049	0.0130949	3	-0.040487	0.053621	0.058398	0.534657	0.83951	FALSE	None
GCN1	3	-0.590541	0.120769	3	-0.246632	0.013162	0.237158	0.279926	0.652945	FALSE	None
GCSH	3	-0.49291	0.0911205	3	-0.452533	0.177942	-0.0695997	0.548641	0.847534	FALSE	None
GEMIN6	3	-0.737156	0.362178	3	-0.475691	0.0797518	0.132263	0.320187	0.677692	FALSE	None
GEN1	3	-0.289799	0.0244637	3	-0.0702855	0.0536278	0.1711	0.065444	0.37886	FALSE	None
GGNBP2	3	-0.987539	0.0508729	3	-0.663874	0.017852	0.14567	0.314867	0.676629	FALSE	None
GHDC	3	-0.388879	0.0306338	3	-0.456824	0.00603491	-0.181089	0.0748312	0.393507	FALSE	None
GID8	3	-0.611367	0.0476186	3	-0.578614	0.0215765	-0.113476	0.160241	0.519978	FALSE	None
GJC1	3	-0.320478	0.0107391	3	-0.111419	0.109189	0.149727	0.194187	0.570142	FALSE	None
GLS	3	0.196108	0.0092972	3	-0.0384855	0.0165407	-0.189917	0.136747	0.495875	FALSE	None
GNA13	3	-0.392884	0.0934374	3	-0.204628	0.075827	0.118895	0.284927	0.658526	FALSE	None
GNL2	3	-2.20631	0.826307	3	-1.68262	1.06428	0.18062	0.289713	0.662013	FALSE	None
GNPTG	3	0.0208392	0.0173377	3	-0.00472791	0.0161566	-0.0160068	0.874271	0.966472	FALSE	None
GOT1	3	-0.290646	0.0144898	3	-0.154689	0.00534116	0.074966	0.398612	0.742801	FALSE	None
GOT2	3	-0.546842	0.0615945	3	-0.399344	0.00283507	0.0158777	0.868403	0.964278	FALSE	None
GPX4	3	-2.65847	1.47258	3	-1.90408	0.502653	0.349817	0.155878	0.517056	FALSE	None
GRHL2	3	-0.0601776	0.01577	3	-0.0918901	0.00239457	-0.0436342	0.6323	0.883645	FALSE	None
GRK6	3	-0.0255241	0.0468332	3	0.0859712	0.0252847	0.130173	0.181086	0.546474	FALSE	None
GRSF1	3	-0.155354	0.08209	3	-0.172922	0.00250657	-0.0573277	0.55013	0.847534	FALSE	None
GSK3B	3	0.1815	0.000835612	3	0.230299	0.0254289	0.117564	0.287498	0.659944	FALSE	None
GSPT1	3	-1.2785	0.720597	3	-1.18271	0.813787	-0.107738	0.47883	0.803353	FALSE	None
GSS	3	-0.024126	0.0112384	3	-0.0756536	0.0187208	-0.0587955	0.51114	0.828781	FALSE	None
GSTP1	3	-0.462025	0.177617	3	-0.228811	0.0589443	0.149374	0.330772	0.68116	FALSE	None
GTPBP3	3	-0.184618	0.00570939	3	-0.083192	0.0272789	0.0743312	0.484345	0.808539	FALSE	None
HADHA	3	-0.396615	0.0308025	3	-0.323617	0.0151783	-0.0275439	0.756505	0.941403	FALSE	None
HAX1	3	-0.0898047	0.0613273	3	-0.0580578	0.0381257	0.025556	0.782376	0.9418	FALSE	None
HCN1	3	-0.152009	0.015576	3	0.0181517	0.0173472	0.165444	0.0871906	0.421352	FALSE	None
HDAC2	3	-0.215649	0.000740593	3	-0.183534	0.0194114	-0.0217549	0.828111	0.94829	FALSE	None
HDAC3	3	-2.22435	0.207073	3	-1.45923	0.00923369	0.456069	0.0268484	0.251082	TRUE	None
HEATR3	3	-0.619304	0.054808	3	-0.556457	0.0780605	-0.0865226	0.535463	0.83951	FALSE	None
HECTD1	3	-0.613782	0.0474993	3	-1.14794	0.00687363	-0.717885	0.000107687	0.00906363	TRUE	Negative
HEXIM1	3	0.0737495	0.00365991	3	0.0816648	0.0127819	0.0471168	0.650272	0.88682	FALSE	None
HIGD2A	3	-0.289311	0.0541351	3	-0.213903	0.0469534	0.0112648	0.925342	0.982678	FALSE	None
H1-2	3	-0.425505	0.124584	3	-0.352291	0.0153127	-0.0313478	0.786039	0.9418	FALSE	None
HK2	3	-0.659762	0.0488372	3	-0.349254	0.0153035	0.177851	0.0931604	0.430658	FALSE	None
HLTF	3	-0.0984609	0.0542989	3	-0.0303775	0.0174448	0.0592152	0.627707	0.883645	FALSE	None
ARHGAP45	3	-0.191461	0.0693799	3	-0.0449556	0.0249536	0.12977	0.160559	0.519978	FALSE	None
HNRNPD	3	-0.360037	0.0140002	3	-0.305054	0.0107745	-0.0377255	0.689415	0.906532	FALSE	None
HNRNPK	3	-3.01416	2.41796	3	-2.74472	1.94621	-0.376176	0.20147	0.581385	FALSE	None
UBE2A	6	-0.331809	0.0667061	6	-0.235798	0.0563941	0.019681	0.822822	0.94829	FALSE	None
UBE2E1	3	-0.235593	0.131904	3	-0.14361	0.0429119	0.0465443	0.634627	0.883645	FALSE	None
RIDA	3	-0.116106	0.0468579	3	-0.0694702	0.00947474	0.0292718	0.767286	0.9418	FALSE	None
HSD17B4	3	-0.286726	0.0312027	3	-0.165336	0.000991741	0.0518224	0.680054	0.902568	FALSE	None
HSD17B6	3	-0.0854041	0.0068919	3	-0.101323	0.00248012	-0.0298611	0.78631	0.9418	FALSE	None
HSF1	3	-0.0296616	0.0150963	3	-0.28666	0.0122948	-0.293036	0.00780304	0.140733	TRUE	None
HTRA2	3	-0.0213408	0.00973306	3	-0.0969173	0.00489524	-0.0867861	0.397609	0.742393	FALSE	None
HUS1	3	-0.708192	0.248168	3	-0.675857	0.0689345	-0.129309	0.301717	0.664546	FALSE	None
MRPL58	3	-0.257055	0.0388893	3	-0.289502	0.00237719	-0.103776	0.298159	0.664546	FALSE	None
ID4	3	-0.121794	0.099651	3	0.0858212	0.128151	0.210085	0.0948157	0.430658	FALSE	None
IDH1	3	-0.304906	0.0170194	3	-0.023904	0.0128828	0.241666	0.0162237	0.202296	TRUE	None
IDH2	3	-0.233711	0.0459696	3	-0.0334661	0.000989838	0.176478	0.0949826	0.430658	FALSE	None
IDH3A	3	-0.108042	0.0173783	3	-0.0602892	0.0189664	0.0375243	0.697363	0.911779	FALSE	None
IER3IP1	3	-0.135208	0.0133625	3	-0.129273	0.0190211	-0.0373566	0.761987	0.9418	FALSE	None
IMPDH2	3	-0.490222	0.0128061	3	-0.307475	0.0104304	0.0672189	0.437888	0.773026	FALSE	None
ING2	3	0.188092	0.0959404	3	0.162877	0.01178	0.0313322	0.783743	0.9418	FALSE	None
ING5	3	-0.0333653	0.011657	3	-0.0702387	0.068451	-0.0439559	0.707057	0.914675	FALSE	None
INO80B	3	-0.824203	0.166429	3	-0.687286	0.306503	-0.0142089	0.886368	0.969915	FALSE	None
INO80D	3	-0.13869	0.00842569	3	-0.0213945	0.0247374	0.101234	0.386524	0.731066	FALSE	None
INPP4A	3	-0.577528	0.0441579	3	-0.43392	0.115877	0.0235671	0.810108	0.94829	FALSE	None
INPPL1	3	-0.105485	0.0403304	3	0.0242588	0.0357976	0.129423	0.331138	0.68116	FALSE	None
INSR	3	0.143112	0.0232678	3	0.0435611	0.0110666	-0.0527446	0.560655	0.847534	FALSE	None
IQCH	3	-0.218014	0.0226955	3	-0.243362	0.0154498	-0.084215	0.502925	0.821932	FALSE	None
IREB2	3	0.0983062	0.0213316	3	0.0603773	0.0202823	-0.00357297	0.971364	0.996116	FALSE	None
IRF2BP1	3	-0.0595915	0.051022	3	-0.130481	0.0402937	-0.0847428	0.407888	0.750395	FALSE	None
IRS2	3	-0.0138841	0.00926856	3	-0.234589	0.0534907	-0.252757	0.0484903	0.333107	FALSE	None
ITGA1	3	-0.306664	0.00281597	3	-0.190364	0.027259	0.054105	0.618969	0.878049	FALSE	None
ITGA2	3	-0.133595	0.0275343	3	-0.0560345	0.0200243	0.061808	0.518181	0.830735	FALSE	None
ITGA3	3	-0.330381	0.0221858	3	-0.131029	0.0340306	0.131529	0.305577	0.665433	FALSE	None
ITGA4	3	0.101302	0.0855269	3	0.199025	0.0096424	0.160177	0.212685	0.594341	FALSE	None
ITGA5	3	-0.646467	0.00520329	3	-0.367893	0.0123182	0.138419	0.261252	0.637355	FALSE	None
ITGA6	3	-0.0722931	0.0694319	3	0.100845	0.00117278	0.192256	0.0773124	0.395672	FALSE	None
ITGA7	3	-0.183278	0.00398519	3	-0.20681	0.00418659	-0.070712	0.484787	0.808539	FALSE	None
ITGA9	3	-0.0684335	0.132942	3	-0.0588251	0.0632862	0.00053722	0.995909	0.996887	FALSE	None
ITGAE	3	0.129102	0.00201092	3	-0.0682274	0.00888239	-0.167341	0.0775674	0.395672	FALSE	None
ITGAV	3	-2.57341	3.30699	3	-1.74678	2.21576	0.396784	0.137521	0.495875	FALSE	None
ITGB1	3	0.171416	0.037134	3	0.421137	0.0172909	0.335241	0.00242631	0.0720757	TRUE	None
ITGB4	3	-0.10909	0.041229	3	-0.0530591	0.0375154	0.039856	0.776939	0.9418	FALSE	None
ITGB5	3	-4.49416	0.148431	3	-3.33968	0.165492	0.271975	0.463563	0.794396	FALSE	None
JAK2	3	0.0394944	0.0261019	3	0.10127	0.0158227	0.0987654	0.271427	0.646559	FALSE	None
JTB	3	-1.21949	0.18502	3	-0.538012	0.0273106	0.495353	0.0028363	0.0785255	TRUE	None
KAT6A	3	0.249919	0.019167	3	0.136824	0.00293012	-0.0458913	0.610471	0.87359	FALSE	None
KAT7	3	-0.0997731	0.0437573	3	-0.238684	0.0315846	-0.19105	0.0326201	0.265696	TRUE	None
KCTD5	3	0.924176	0.0791829	3	0.684515	0.0966377	-0.0656288	0.421909	0.757135	FALSE	None
KDELR3	3	-0.201179	0.0443865	3	-0.0988272	0.0272133	0.0670198	0.517623	0.830735	FALSE	None
KDM5A	3	0.159383	0.0062737	3	-0.0365324	0.00227185	-0.154549	0.150331	0.510353	FALSE	None
KDM5C	3	-1.26861	0.0871215	3	-0.979757	0.0460452	0.0814064	0.570061	0.847534	FALSE	None
KDM6A	3	0.0502081	0.201942	3	0.125812	0.029397	0.102694	0.477084	0.802922	FALSE	None
KEAP1	3	1.41367	0.0204989	3	1.03476	7.99682e-05	-0.121216	0.178313	0.546474	FALSE	None
KIAA0100	3	-0.626022	0.188223	3	-0.490736	0.019466	0.00287507	0.981358	0.996887	FALSE	None
KHDC4	3	-0.213489	0.0184557	3	-0.208618	0.0341781	-0.0521781	0.641707	0.884955	FALSE	None
RIC1	3	-0.609105	0.0196293	3	-0.0707991	0.0177865	0.430732	0.000918107	0.0370915	TRUE	None
KIF14	3	-0.466136	0.0443563	3	-0.456642	0.00655272	-0.126508	0.249689	0.619549	FALSE	None
KIF18B	3	-0.300691	0.00408673	3	-0.166345	0.0253902	0.062105	0.567807	0.847534	FALSE	None
KIF4A	3	-0.193412	0.00285321	3	-0.395397	0.0248205	-0.291828	0.0110179	0.168607	TRUE	None
KIRREL1	3	1.23435	0.033075	3	1.17529	0.0168476	0.192141	0.0227056	0.234121	TRUE	None
KLF10	3	-0.357125	0.0488683	3	-0.195631	0.0228509	0.0806882	0.469537	0.799717	FALSE	None
KLF4	3	-0.0874297	0.0107826	3	-0.270817	0.0880681	-0.224651	0.0861251	0.420224	FALSE	None
KLF5	3	-0.348017	0.00471115	3	-0.401617	0.0214521	-0.165098	0.116902	0.472665	FALSE	None
KMT2A	3	-1.08752	0.136408	3	-0.940297	0.0535291	-0.0560434	0.618059	0.878049	FALSE	None
KMT2C	3	-0.088226	0.0985551	3	0.0134472	0.0386213	0.0998871	0.445674	0.781103	FALSE	None
KMT2D	3	-0.028049	0.0218013	3	-0.0759589	0.054483	-0.0516578	0.606647	0.87359	FALSE	None
KPNA4	3	-0.399137	0.032789	3	-0.177162	0.000456046	0.136513	0.181076	0.546474	FALSE	None
KRAS	3	-3.8655	1.32225	3	-3.71313	0.0786669	-0.689164	0.0289923	0.261449	TRUE	None
L3MBTL3	3	0.837112	0.139426	3	0.364842	0.111746	-0.336081	0.00465716	0.106903	TRUE	None
LAMTOR5	3	-1.58387	0.151728	3	-1.57962	0.0814911	-0.281599	0.0148959	0.194062	TRUE	None
LARP7	3	0.0548933	0.0638144	3	0.173425	0.0735411	0.161996	0.064592	0.37886	FALSE	None
LCMT1	3	0.238082	0.0477652	3	0.227246	0.0108749	0.0667911	0.462932	0.794396	FALSE	None
LDHA	3	-0.333807	0.130174	3	-0.329908	0.0512148	-0.0803963	0.476367	0.802922	FALSE	None
LDHB	3	-0.0433907	0.0572431	3	0.0366459	0.0203716	0.0975973	0.226388	0.59713	FALSE	None
LGR4	3	0.0708012	0.0532019	3	-0.0578608	0.00997538	-0.117182	0.183024	0.546906	FALSE	None
LIG1	3	-0.283155	0.0200103	3	-0.203216	0.051166	0.00329833	0.980006	0.996887	FALSE	None
LIG3	3	-0.0501736	0.0488316	3	0.0110611	0.0365616	0.0587391	0.557308	0.847534	FALSE	None
LIG4	3	-0.135246	0.00898408	3	0.00571467	0.0231057	0.137003	0.190097	0.559762	FALSE	None
LIMS1	3	-2.15665	1.52955	3	-1.75397	0.661861	0.0661983	0.697341	0.911779	FALSE	None
LIN28B	3	-0.333283	0.00450936	3	-0.237115	0.0645149	0.0153242	0.903333	0.976837	FALSE	None
LIPT1	3	-0.382192	0.385173	3	-0.0697547	0.0355374	0.264171	0.0395182	0.301564	FALSE	None
LMNA	3	-0.0612434	0.0295895	3	-0.191965	0.0580556	-0.164097	0.152054	0.511914	FALSE	None
LMO2	3	-0.03938	0.00390733	3	0.0197022	0.00254328	0.0818634	0.369882	0.71704	FALSE	None
LRP5	3	-0.316189	0.003136	3	-0.377779	0.0385867	-0.16725	0.112197	0.467392	FALSE	None
LRP6	3	-0.582944	0.0620127	3	-0.318907	0.0276886	0.137602	0.172179	0.536595	FALSE	None
LRRC45	3	-0.0838469	0.0130165	3	-0.0834627	0.101339	-0.00611104	0.959021	0.991532	FALSE	None
LRRC49	3	-0.197777	0.0466855	3	-0.261012	0.00344889	-0.128446	0.2264	0.59713	FALSE	None
LYRM4	3	-2.6227	0.0173679	3	-2.14056	0.0939341	0.0958249	0.477779	0.802922	FALSE	None
MAD1L1	3	-0.646172	0.065182	3	-0.580623	0.00495295	-0.0884563	0.412707	0.751992	FALSE	None
MAD2L2	3	-0.83809	0.374393	3	-0.623342	0.0885207	0.0699032	0.658778	0.889778	FALSE	None
MANF	3	-0.308523	0.260795	3	-0.201967	0.0952009	0.0587933	0.524966	0.834446	FALSE	None
MAP2K1	3	-0.284172	0.0518933	3	-0.341359	0.0849932	-0.138845	0.225821	0.59713	FALSE	None
MAP2K4	3	0.0842721	0.103086	3	0.0468247	0.18345	-0.0214057	0.859758	0.961804	FALSE	None
MAP2K5	3	-1.30916	0.036842	3	-1.2624	0.0338688	-0.194259	0.241915	0.612608	FALSE	None
MAP3K1	3	-0.162089	0.0597488	3	-0.086347	0.0324484	0.052299	0.565625	0.847534	FALSE	None
MAP4K4	3	0.899108	0.0952782	3	0.902523	0.0513296	0.19047	0.0312951	0.265696	TRUE	None
MAPK1	3	-0.638048	0.0417082	3	-0.54533	0.0145778	-0.0548673	0.58681	0.856471	FALSE	None
MARCHF5	3	-0.108368	0.02527	3	-0.00828463	0.0175966	0.0961829	0.279907	0.652945	FALSE	None
MARK2	3	-1.98153	0.0254438	3	-1.38207	0.017938	0.336818	0.0943351	0.430658	FALSE	None
MAT2B	3	-0.0961924	0.0300564	3	0.051304	0.0804166	0.159001	0.110811	0.46633	FALSE	None
MATR3	3	-0.850363	0.0410963	3	-0.888985	0.00013236	-0.219425	0.0641505	0.37886	FALSE	None
MBNL1	3	-0.888384	0.126223	3	-0.741177	0.0396886	-0.0232696	0.838528	0.951587	FALSE	None
MBTD1	3	-0.452643	0.0594066	3	-0.399632	0.00598772	-0.068822	0.471439	0.801604	FALSE	None
MCCC2	3	-0.156598	0.00596234	3	-0.179848	0.00741011	-0.0658926	0.459065	0.789873	FALSE	None
MCL1	3	-0.0267669	0.00731508	3	-0.0325758	0.0184013	0.00127537	0.987528	0.996887	FALSE	None
MCM10	3	-1.67461	1.81044	3	-1.35332	0.74302	0.0475018	0.827849	0.94829	FALSE	None
MCM2	3	-3.63293	0.355855	3	-2.78066	0.698183	0.238003	0.409109	0.751273	FALSE	None
MCM3	3	-1.52654	0.715716	3	-1.39907	1.02263	-0.123511	0.384094	0.729202	FALSE	None
MCM4	3	-1.81458	0.180898	3	-1.82641	0.359624	-0.303181	0.146481	0.505367	FALSE	None
MCM5	3	-2.50664	2.50253	3	-2.08908	0.985902	0.00187382	0.992895	0.996887	FALSE	None
MCM6	3	-2.79716	1.50829	3	-2.13864	0.679492	0.205995	0.405323	0.748402	FALSE	None
MCM7	3	-1.15622	0.872888	3	-1.01397	0.721156	-0.0301843	0.806916	0.94829	FALSE	None
MCM9	3	-0.0213519	0.0133996	3	-0.276119	0.0259595	-0.293457	0.0172579	0.205065	TRUE	None
MDH2	3	0.0147757	0.0157759	3	-0.00391135	0.0220689	0.00249776	0.980495	0.996887	FALSE	None
MDK	3	-0.229936	0.124936	3	-0.181049	0.00217327	0.00153859	0.990995	0.996887	FALSE	None
MDM2	3	-0.228885	0.0626663	3	-0.102929	0.0117455	0.0872466	0.474579	0.802922	FALSE	None
MDM4	3	-0.0564411	0.0725645	3	-0.078472	0.0136091	-0.0310492	0.74669	0.938846	FALSE	None
MEAF6	3	-1.08181	0.211285	3	-1.26057	0.0645944	-0.401628	0.0880267	0.423366	FALSE	None
MED1	3	-1.9063	0.344005	3	-1.21899	0.0470336	0.415337	0.0137151	0.192847	TRUE	None
MED12	3	-1.447	0.312315	3	-1.82908	1.10092	-0.647566	0.00170517	0.0555556	TRUE	None
MED13L	3	-0.188475	0.0732728	3	-0.336566	0.0282825	-0.222656	0.0689566	0.37886	FALSE	None
MED16	3	-0.391631	0.0643883	3	-0.0978301	0.00710999	0.231046	0.0238094	0.23576	TRUE	None
MED23	3	-0.849335	0.00933714	3	-0.811967	0.00526881	-0.136687	0.269539	0.643581	FALSE	None
MED24	3	-1.49531	0.000124555	3	-1.25199	0.141569	0.00511697	0.970401	0.996116	FALSE	None
MED25	3	-0.323893	0.0490357	3	-0.304542	0.02663	-0.0735533	0.485062	0.808539	FALSE	None
MEN1	3	-0.509072	0.0273588	3	-0.730027	0.0574729	-0.374537	0.00292468	0.0785255	TRUE	None
MET	3	-0.265622	0.0283827	3	-0.148724	0.0163555	0.0596755	0.572523	0.847534	FALSE	None
MFSD9	3	-0.219438	0.0597117	3	-0.151571	0.0605032	0.0294699	0.746536	0.938846	FALSE	None
MGA	3	-0.344128	0.0349596	3	-0.210337	0.045832	0.0572518	0.549431	0.847534	FALSE	None
MGAT1	3	-0.668042	0.0408776	3	-0.556087	0.0513368	-0.0378771	0.769161	0.9418	FALSE	None
MGAT5	3	-0.343959	0.0331163	3	-0.139655	0.0427613	0.134384	0.307323	0.665945	FALSE	None
OGA	3	-0.0380207	0.0901505	3	-0.157092	0.0141576	-0.135286	0.214528	0.594341	FALSE	None
MGMT	3	0.144527	0.029519	3	-0.0439567	0.00218541	-0.151056	0.159549	0.519978	FALSE	None
MIB1	3	-0.357285	0.000726481	3	-0.345296	0.0181361	-0.0938099	0.2661	0.642969	FALSE	None
MITF	3	-0.586598	0.0703996	3	-0.197296	0.0316556	0.293479	0.0219182	0.233396	TRUE	None
MLH1	3	-0.335746	0.00952682	3	-0.110335	0.0418184	0.164422	0.214632	0.594341	FALSE	None
MLH3	3	0.0506831	0.00399832	3	-0.0203738	0.0109467	-0.0521899	0.615955	0.878049	FALSE	None
MAP3K20	3	0.00988271	0.0452036	3	0.0418353	0.0088803	0.0585869	0.518145	0.830735	FALSE	None
MMGT1	3	-0.771217	0.220769	3	-0.809059	0.0493342	-0.222583	0.140537	0.497527	FALSE	None
MNT	3	-0.0395839	0.0243751	3	-0.232445	0.00268431	-0.226696	0.0286028	0.26026	TRUE	None
MOGS	3	-0.265063	0.0124149	3	-0.0587721	0.0184345	0.16747	0.15622	0.517056	FALSE	None
MORC2	3	-0.174902	0.0593993	3	-0.10298	0.0651943	0.034403	0.730847	0.928497	FALSE	None
MPC1	3	-0.175921	0.00934253	3	-0.253428	0.0894106	-0.137541	0.293968	0.664546	FALSE	None
MPHOSPH8	3	-0.236839	0.0594439	3	-0.167791	0.0410856	0.0134886	0.92766	0.982678	FALSE	None
MRE11	3	-0.639241	0.225919	3	-0.3621	0.224843	0.167862	0.110398	0.46633	FALSE	None
MRPL28	3	-0.168608	0.159076	3	-0.146461	0.0129902	-0.0117564	0.91743	0.982585	FALSE	None
MRPL41	3	-0.316254	0.082139	3	-0.384296	0.00162174	-0.162353	0.11803	0.474943	FALSE	None
MRPS21	3	-0.394107	0.028121	3	-0.510402	0.0576467	-0.240256	0.0751949	0.393507	FALSE	None
MSH2	3	-0.22896	0.00707171	3	-0.139323	0.0489	0.0355131	0.762861	0.9418	FALSE	None
MSH3	3	-0.143676	0.0530292	3	-0.0431883	0.0566828	0.0759118	0.391907	0.737753	FALSE	None
MSH6	3	-0.447155	0.0314853	3	-0.153797	0.0139758	0.201267	0.116421	0.472665	FALSE	None
MTF2	3	-0.554555	0.46973	3	-0.582645	0.843903	-0.119451	0.39328	0.737753	FALSE	None
MTFMT	3	-0.160831	0.0103418	3	-0.375543	0.0333438	-0.291052	0.0250896	0.241338	TRUE	None
MTG1	3	-0.128801	0.06132	3	-0.0850453	0.0302941	0.0185545	0.835577	0.951447	FALSE	None
MTHFD1L	3	0.163173	0.00541015	3	0.0884619	0.0567138	-0.0196819	0.860325	0.961804	FALSE	None
MTX1	3	-0.479968	0.053666	3	-0.113206	0.0399572	0.284706	0.0263367	0.248599	TRUE	None
MUS81	3	-0.474615	0.000284779	3	-0.379659	0.00353499	-0.030266	0.766421	0.9418	FALSE	None
MYD88	3	-0.289386	0.0468074	3	-0.158681	0.0143893	0.0689077	0.566288	0.847534	FALSE	None
MYH9	3	-1.58884	0.157281	3	-1.08051	0.180928	0.254689	0.0449601	0.324355	FALSE	None
MYL6	3	-0.15473	0.124542	3	0.0467505	0.0191505	0.192566	0.0871301	0.421352	FALSE	None
MZT2B	3	-0.790567	0.212921	3	-0.500489	0.0134027	0.137806	0.29286	0.664546	FALSE	None
NACC1	3	-0.427507	0.00108391	3	-0.385994	0.0033261	-0.084555	0.321467	0.677692	FALSE	None
NADK	3	-0.343561	0.058397	3	-0.299741	0.00274735	-0.0482375	0.634734	0.883645	FALSE	None
NAGK	3	-0.180258	0.0444461	3	0.0466645	0.0197947	0.216592	0.0322706	0.265696	TRUE	None
NAMPT	3	-0.00297368	0.0135677	3	-0.0416416	0.00307633	-0.0222496	0.856726	0.961436	FALSE	None
NBN	3	-0.0533997	0.00819923	3	0.0727094	0.00292834	0.140971	0.141423	0.497527	FALSE	None
NCOR1	3	0.0750367	0.00335708	3	-0.0746427	0.00299472	-0.137165	0.119071	0.475393	FALSE	None
NCSTN	3	-1.06856	0.0369282	3	-0.610998	0.0412441	0.279146	0.0611054	0.37632	FALSE	None
NDUFA11	3	-0.216908	0.00313602	3	-0.0394736	0.00615423	0.147228	0.15142	0.511486	FALSE	None
NDUFAF3	3	-0.170669	0.0149396	3	-0.229938	0.0178537	-0.118508	0.2158	0.594341	FALSE	None
NDUFAF6	3	0.260924	0.0458422	3	-0.0964918	0.0432767	-0.321115	0.0230164	0.234121	TRUE	None
NDUFB10	3	-0.0588357	0.0809778	3	-0.294802	0.0710834	-0.281333	0.0229798	0.234121	TRUE	None
NDUFB11	3	-0.16981	0.112213	3	-0.264217	0.0141791	-0.151035	0.138455	0.495884	FALSE	None
NDUFC1	3	-0.140707	0.0182164	3	-0.0929965	0.00381047	0.0204638	0.836968	0.951587	FALSE	None
NDUFS6	3	-0.225107	0.00826367	3	-0.0199118	0.037549	0.180133	0.0941164	0.430658	FALSE	None
NEIL1	3	-0.880562	1.02381	3	-0.800051	0.547364	-0.0686019	0.533509	0.839321	FALSE	None
NELFE	3	-0.367936	0.0249588	3	-0.537981	0.139052	-0.297255	0.0189083	0.217015	TRUE	None
NEMF	3	-0.286741	0.0279322	3	-0.446929	0.0521731	-0.268068	0.0504914	0.335502	FALSE	None
NEO1	3	-0.275117	0.211462	3	-0.127049	0.310891	0.111762	0.326201	0.680708	FALSE	None
NF1	3	-0.190171	0.0555542	3	-0.333735	0.200161	-0.202796	0.171009	0.534734	FALSE	None
NF2	3	2.07526	0.0191397	3	1.50672	0.0252204	-0.124487	0.154043	0.515177	FALSE	None
NFE2L1	3	-0.35363	0.00113768	3	-1.54304	0.541291	-1.3926	9.73277e-06	0.00163835	TRUE	Negative
NFE2L2	3	-0.190484	0.253026	3	-0.0283375	0.0080857	0.129863	0.25284	0.624372	FALSE	None
NGLY1	3	-0.272432	0.0605415	3	-1.86467	0.638881	-1.78541	2.61923e-07	0.000132271	TRUE	Negative
NHEJ1	3	-0.22486	0.0136387	3	0.099514	0.0182671	0.318642	0.00768338	0.140733	TRUE	None
NHLRC2	3	-0.893954	0.050429	3	-0.62141	0.0207365	0.10583	0.274118	0.647972	FALSE	None
NKX2-1	3	-0.00674639	0.007708	3	0.026858	0.00534228	0.0528009	0.582309	0.851287	FALSE	None
NKX3-1	3	0.191752	0.0589198	3	0.104733	0.0217098	-0.0272317	0.751191	0.941403	FALSE	None
NME6	3	-0.328678	0.0142732	3	-0.212598	0.0323571	0.0416092	0.730563	0.928497	FALSE	None
NONO	3	-0.625621	0.00732911	3	-0.352294	0.0446731	0.141702	0.237791	0.612608	FALSE	None
NOP16	3	-2.54303	0.0515655	3	-2.06151	0.0574487	0.12552	0.358892	0.707971	FALSE	None
NOTCH1	3	0.0466083	0.0215658	3	-0.0784226	0.0484535	-0.115063	0.397658	0.742393	FALSE	None
NOTCH2	3	-0.22886	0.110961	3	-0.206688	0.0210101	-0.0382248	0.698306	0.911779	FALSE	None
NOTCH3	3	0.0271047	0.0484131	3	0.0224749	0.0631183	0.0122574	0.905085	0.977685	FALSE	None
NPRL2	3	-0.148615	0.00190364	3	-0.0696551	0.0428393	0.0569457	0.679344	0.902568	FALSE	None
NRAS	3	-0.174944	0.00709946	3	-0.13577	0.00398361	-0.00112641	0.992854	0.996887	FALSE	None
NSD1	3	-0.332066	0.0287015	3	0.00927687	0.000899562	0.306213	0.0106994	0.166252	TRUE	None
NSUN2	3	-0.203092	0.0346484	3	-0.1093	0.0143377	0.0529985	0.631645	0.883645	FALSE	None
NSUN3	3	-0.332497	0.0138229	3	-0.171889	0.0357586	0.0997392	0.369529	0.71704	FALSE	None
NUDT16L1	3	-0.251655	0.100093	3	-0.219183	0.00966041	-0.0357628	0.793825	0.944362	FALSE	None
NUDT19	3	-0.576813	0.852027	3	-0.46011	0.421608	0.021401	0.863618	0.962753	FALSE	None
NUFIP2	3	-0.487441	0.00961459	3	-0.316773	0.0496181	0.0599783	0.643206	0.884955	FALSE	None
NXT1	3	0.390018	0.00496596	3	0.530314	0.0234568	0.256303	0.0153713	0.194062	TRUE	None
OLA1	3	-0.502785	0.214257	3	-0.512081	0.0577557	-0.126631	0.305704	0.665433	FALSE	None
ORC1	3	-0.98599	0.071667	3	-0.875068	0.0992832	-0.068916	0.490968	0.812504	FALSE	None
ORC2	3	-1.68295	0.375503	3	-1.41527	0.342976	0.0137414	0.885103	0.969581	FALSE	None
OTUB1	3	-0.573473	0.0545794	3	-0.42262	0.00332936	0.00851064	0.939598	0.985456	FALSE	None
OTUD5	3	0.611463	0.000395573	3	0.523015	0.00777247	0.0428265	0.591243	0.860455	FALSE	None
PAIP1	3	-0.264662	0.102436	3	-0.296098	0.121211	-0.103443	0.295372	0.664546	FALSE	None
PALB2	3	-0.607212	0.165422	3	-0.447931	0.0749284	0.0330016	0.708214	0.914675	FALSE	None
APLF	3	-0.16086	0.00611605	3	-0.09617	0.00247091	0.0360514	0.703134	0.914675	FALSE	None
PAPSS1	3	-0.161388	0.0576835	3	0.00881952	0.000711987	0.162522	0.135775	0.495875	FALSE	None
PARP1	3	-0.292029	0.135893	3	-0.15327	0.0437549	0.0919267	0.328642	0.68116	FALSE	None
PARP10	3	-0.179037	0.0281671	3	-0.20588	0.0274651	-0.0751564	0.498506	0.818867	FALSE	None
PARP11	3	-0.201909	0.00380717	3	-0.241732	0.0192648	-0.0986948	0.272514	0.647621	FALSE	None
PARP12	3	0.0558402	5.71501e-05	3	0.01835	0.00645617	-0.0127001	0.924063	0.982678	FALSE	None
PARP14	3	-0.012087	0.0231557	3	-0.101577	0.0217068	-0.0935596	0.311332	0.67046	FALSE	None
PARP15	3	-0.392099	0.0596971	3	-0.291695	0.0231531	-0.000727309	0.995064	0.996887	FALSE	None
PARP16	3	-0.0421897	0.0289815	3	-0.0359242	0.0396451	0.00591719	0.947108	0.987727	FALSE	None
PARP2	3	-0.261428	0.0227716	3	-0.191081	0.0229789	0.0102192	0.906161	0.977801	FALSE	None
PARP3	3	-0.265297	0.0508646	3	-0.218203	0.022348	-0.0186767	0.826535	0.94829	FALSE	None
PARP4	3	0.0161845	0.0604059	3	-0.0419768	0.0175626	-0.0466802	0.610373	0.87359	FALSE	None
PARP6	3	0.0353204	0.0204351	3	-0.0250499	0.0703884	-0.0430959	0.662488	0.889778	FALSE	None
PARP8	3	-0.231844	0.0495373	3	-0.177232	0.001063	-0.00780315	0.949587	0.987727	FALSE	None
PARP9	3	0.0779133	0.0356735	3	0.0528055	0.0212779	0.0083752	0.944019	0.987018	FALSE	None
PAWR	3	0.00267154	0.02856	3	0.300899	0.00605965	0.363213	0.00405607	0.0999179	TRUE	None
PAXIP1	3	0.578693	0.00457272	3	0.496875	0.0100102	0.0428206	0.632545	0.883645	FALSE	None
PBDC1	3	-0.156783	0.00149681	3	-0.152257	0.0586548	-0.0327325	0.757444	0.941403	FALSE	None
PBRM1	3	-0.798481	0.0888655	3	-0.447775	0.0083093	0.203024	0.127705	0.489807	FALSE	None
PCBP1	3	-0.132315	0.0561261	3	-0.248782	0.00896947	-0.167062	0.135997	0.495875	FALSE	None
PCGF3	3	0.0168613	0.0701352	3	-0.0175681	0.0258436	-0.0266005	0.766292	0.9418	FALSE	None
PDCD10	3	1.09951	0.0204559	3	0.776467	0.0129213	-0.126827	0.164674	0.529684	FALSE	None
PDCD5	3	-1.13875	0.00368221	3	-0.522284	0.00341662	0.442663	0.000837384	0.0365462	TRUE	None
PDCD6IP	3	-0.374918	0.0691399	3	-0.0701113	0.00951124	0.245788	0.0196373	0.219218	TRUE	None
PDCL	3	-1.85574	0.0164084	3	-1.33015	0.0127917	0.264475	0.0783376	0.397593	FALSE	None
PDGFRA	3	-0.388592	0.048703	3	-0.106832	0.00113451	0.208429	0.0299621	0.265454	TRUE	None
PDHA1	3	-0.078943	0.0643487	3	-0.157253	0.00243338	-0.100537	0.335154	0.684452	FALSE	None
PDK1	3	-0.12473	0.0408818	3	-0.0680421	0.0267575	0.0381496	0.69873	0.911779	FALSE	None
PDS5A	3	-0.75288	0.0173592	3	-0.868069	0.0308242	-0.285661	0.0621535	0.377863	FALSE	None
PDSS1	3	-0.336804	0.159424	3	-0.248254	0.0470238	0.0144935	0.887998	0.970647	FALSE	None
PELO	3	-1.03467	0.0371294	3	-0.721059	0.00246322	0.132959	0.291128	0.663746	FALSE	None
PFKM	3	-0.160563	0.0221276	3	-0.106648	0.044534	0.0216183	0.855983	0.961436	FALSE	None
PGAP2	3	-0.344669	0.147586	3	-0.384956	0.00489445	-0.13814	0.213547	0.594341	FALSE	None
PGLS	3	-0.0614314	0.0163004	3	-0.140371	0.0446784	-0.09785	0.41847	0.756521	FALSE	None
PGM2	3	-0.153198	0.136596	3	0.120482	0.0564194	0.269608	0.0495752	0.333807	FALSE	None
PGP	3	-0.0218792	0.0265816	3	0.0161983	0.0423373	0.0449503	0.633281	0.883645	FALSE	None
PHF12	3	-0.213398	0.0533301	3	-0.273199	0.0256917	-0.124248	0.23788	0.612608	FALSE	None
PHGDH	3	-0.0260254	0.0135869	3	-0.0517287	0.0347233	-0.0257346	0.825859	0.94829	FALSE	None
PHLPP1	3	0.127973	0.0174707	3	0.12341	0.025847	0.0503083	0.618981	0.878049	FALSE	None
PIAS1	3	-0.0708601	0.00682805	3	-0.173453	0.0556791	-0.129117	0.215426	0.594341	FALSE	None
PIAS2	3	0.0886531	0.00944301	3	0.269395	0.0217339	0.251071	0.0272284	0.2523	TRUE	None
PIAS3	3	-0.120345	0.103674	3	-0.149986	0.0578845	-0.0638482	0.643777	0.884955	FALSE	None
PIAS4	3	0.270447	0.0289481	3	0.309722	0.0137514	0.118299	0.219395	0.59713	FALSE	None
PICALM	3	-0.331185	0.0443125	3	-0.131346	0.00661266	0.13453	0.247567	0.618917	FALSE	None
PIGB	3	-0.122683	0.0112804	3	-0.250397	0.0510098	-0.177906	0.156652	0.517056	FALSE	None
PIGF	3	-0.185024	0.0313379	3	-0.118651	0.0447783	0.0255754	0.78511	0.9418	FALSE	None
PIH1D1	3	-0.221024	0.0474422	3	-0.249791	0.0496973	-0.0887088	0.485924	0.808539	FALSE	None
PIK3CA	3	-0.428428	0.20546	3	-0.20235	0.134048	0.153704	0.169362	0.534734	FALSE	None
PIK3R1	3	-0.0121429	0.0687458	3	-0.0825689	0.14827	-0.068492	0.572625	0.847534	FALSE	None
PIN1	3	0.0105364	0.00531168	3	0.0939816	0.00358254	0.127929	0.179315	0.546474	FALSE	None
PITRM1	3	-0.157752	0.0835716	3	0.133459	0.0306148	0.307724	0.013186	0.192847	TRUE	None
PKP2	3	-0.238498	0.0893544	3	-0.288189	0.242673	-0.104794	0.485216	0.808539	FALSE	None
PLAA	3	-0.276704	0.00385269	3	-0.0594942	0.00750755	0.174048	0.0693786	0.37886	FALSE	None
PMAIP1	3	-0.00727009	0.0387643	3	0.152927	0.0177367	0.19753	0.0484908	0.333107	FALSE	None
PMM2	3	-0.0547214	0.0461706	3	0.064805	0.00380078	0.137219	0.224525	0.59713	FALSE	None
PMS1	3	-0.0976243	0.0313047	3	-0.0100895	0.00928998	0.0894287	0.373012	0.718973	FALSE	None
PMS2	3	-0.156158	0.0611417	3	-0.169752	0.0547129	-0.0504568	0.582415	0.851287	FALSE	None
PNPO	3	-0.413589	0.00457536	3	-0.266323	0.0113066	0.0362323	0.75408	0.941403	FALSE	None
PNRC2	3	-0.334742	0.165542	3	-0.568133	0.100314	-0.337798	0.00753775	0.140733	TRUE	None
POLA1	3	-1.63927	1.19453	3	-2.09017	1.61457	-0.771194	0.00763017	0.140733	TRUE	Negative
POLB	3	-0.0487957	0.0425809	3	0.00999639	0.036094	0.0689799	0.543172	0.846598	FALSE	None
POLD1	3	-0.208989	0.0847131	3	0.0433004	0.0868929	0.238066	0.017176	0.205065	TRUE	None
POLD3	3	-3.86736	3.97123	3	-2.78492	1.39035	0.256941	0.121797	0.478656	FALSE	None
POLE	3	-2.60505	2.03489	3	-2.73121	2.32363	-0.639158	0.0233941	0.234121	TRUE	None
POLE3	3	-0.756092	0.00713007	3	-0.718081	0.0157149	-0.126117	0.220777	0.59713	FALSE	None
POLE4	3	-0.489527	0.0791435	3	-0.490878	0.0222704	-0.120915	0.399861	0.74353	FALSE	None
POLG2	3	-0.273195	0.0955296	3	-0.0264356	0.00946054	0.20873	0.0679415	0.37886	FALSE	None
POLH	3	-0.452651	0.00882437	3	-0.322784	0.0422435	0.0117819	0.919856	0.982585	FALSE	None
POLI	3	-0.20848	0.213802	3	-0.117264	0.136388	0.0682455	0.546922	0.847355	FALSE	None
POLK	3	-0.16681	0.0241778	3	-0.1304	0.0139819	-0.000387241	0.996887	0.996887	FALSE	None
POLL	3	-0.280763	0.0304219	3	-0.245506	0.00643565	-0.0420608	0.743941	0.938053	FALSE	None
POLM	3	0.00136199	0.019947	3	-0.111258	0.0234481	-0.11044	0.347946	0.696546	FALSE	None
POLN	3	-0.0389426	0.0200475	3	-0.130718	0.0167813	-0.10076	0.329789	0.68116	FALSE	None
POLQ	3	-0.905972	0.0908862	3	-0.675773	0.00217843	0.0473176	0.719165	0.919439	FALSE	None
POLR2G	3	-3.64363	1.87849	3	-3.23404	0.315587	-0.259038	0.562957	0.847534	FALSE	None
POT1	3	-1.26525	0.0739834	3	-0.483658	0.00503632	0.591858	0.00125852	0.0478655	TRUE	None
PPHLN1	3	-0.221078	0.136735	3	-0.0436065	0.0273222	0.1456	0.153838	0.515177	FALSE	None
PPM1G	3	-0.0821246	0.00214678	3	-0.035955	0.037936	0.0351318	0.790285	0.94237	FALSE	None
PPP1R18	3	-0.141544	0.036733	3	-0.127418	0.0191873	-0.0227716	0.824248	0.94829	FALSE	None
PTPA	3	-0.0300673	0.0126281	3	-0.122171	0.0548939	-0.103924	0.322072	0.677692	FALSE	None
PPP6R3	3	-0.0182212	0.0428564	3	-0.0477357	0.0103642	-0.019149	0.865736	0.962988	FALSE	None
SLC66A2	3	-0.0880731	0.0180255	3	-0.00928194	0.0150583	0.0809543	0.36214	0.711599	FALSE	None
PRDX1	3	-0.331063	0.0898021	3	-0.249966	0.0483106	0.00986461	0.929969	0.982678	FALSE	None
PRKAA1	3	-0.156089	0.0201469	3	0.011605	0.00195072	0.165088	0.182931	0.546906	FALSE	None
PRKAG1	3	-0.131663	0.00478466	3	-0.174887	0.00173057	-0.0837395	0.318447	0.67712	FALSE	None
PRKDC	3	-0.473775	0.0349433	3	-0.262938	0.00187348	0.0943893	0.357691	0.706983	FALSE	None
PRPF40B	3	-0.335012	0.00103787	3	-0.412441	0.0309197	-0.184692	0.129958	0.489807	FALSE	None
GINS3	3	-0.13446	0.0484253	3	-0.12023	0.0333519	-0.0100174	0.91743	0.982585	FALSE	None
PSMC3IP	3	-0.256955	0.387925	3	-0.0407098	0.0503427	0.191045	0.15587	0.517056	FALSE	None
PSMD6	3	-1.58474	0.227116	3	-1.06408	0.492155	0.290075	0.11995	0.475393	FALSE	None
PSPC1	3	0.106168	0.000222667	3	-0.0139986	0.0906161	-0.097585	0.455637	0.789146	FALSE	None
PTAR1	3	-0.852124	0.0169642	3	-0.70196	0.00678674	-0.0215105	0.788874	0.9418	FALSE	None
PTBP1	3	-0.513974	0.330774	3	-0.441473	0.142627	-0.03173	0.819082	0.94829	FALSE	None
PTEN	3	1.38057	0.00617201	3	1.20698	0.0490868	0.102742	0.263671	0.638627	FALSE	None
PTK7	3	-0.099337	0.0195968	3	-0.258725	0.0424704	-0.201304	0.144215	0.502265	FALSE	None
PXMP4	3	-0.226141	0.0216448	3	-0.356939	0.0347399	-0.215852	0.0887987	0.425055	FALSE	None
PYCARD	3	-0.391481	0.0624864	3	-0.227668	0.0256409	0.0788321	0.491525	0.812504	FALSE	None
QRICH1	3	-0.594278	0.00123873	3	-0.472045	0.134823	-0.0155376	0.9156	0.982585	FALSE	None
QSOX2	3	-0.417738	0.0289228	3	-0.124974	0.0418912	0.218224	0.0388722	0.301554	FALSE	None
RAB10	3	-0.89057	0.0649196	3	-0.530317	0.00372291	0.201007	0.0693804	0.37886	FALSE	None
RAB40B	3	-0.0146256	0.0584211	3	0.028287	0.0189751	0.0571096	0.604037	0.871539	FALSE	None
RABL3	3	0.164787	0.0247066	3	0.291668	0.00843099	0.200322	0.0285921	0.26026	TRUE	None
RABL6	3	-0.165612	0.0339547	3	-0.13039	0.0145987	-0.00540416	0.95282	0.988876	FALSE	None
RAC2	3	-0.0372744	0.000380208	3	-0.0204336	0.00608173	0.0285308	0.775414	0.9418	FALSE	None
RAD1	3	-0.440878	0.0479018	3	-0.597761	0.0244675	-0.294895	0.00956994	0.159837	TRUE	None
RAD17	3	-0.632467	0.134094	3	-0.809382	0.462853	-0.324144	0.0545725	0.353322	FALSE	None
RAD18	3	-0.340839	0.0350632	3	-0.178577	0.0402466	0.0984933	0.348963	0.696546	FALSE	None
RAD50	3	-0.369995	0.117693	3	-0.24231	0.0489211	0.03793	0.712622	0.914675	FALSE	None
RAD51	3	-2.30266	0.820027	3	-1.95958	0.382513	-0.0111718	0.941851	0.985771	FALSE	None
RAD51B	3	-1.08238	0.128671	3	-1.02665	0.104259	-0.14692	0.181256	0.546474	FALSE	None
RAD51C	3	-2.65642	0.472998	3	-2.13416	0.119937	0.138749	0.509355	0.828419	FALSE	None
RAD51D	3	-1.78103	0.0296303	3	-1.05483	0.0244844	0.470033	0.00318778	0.0804915	TRUE	None
RAD52	3	-0.33634	0.0475227	3	-0.291367	0.185512	-0.0362561	0.798746	0.946301	FALSE	None
RAD54B	3	-0.186504	0.0574012	3	-0.214551	0.123537	-0.0678084	0.659619	0.889778	FALSE	None
RAD54L	3	-0.489181	0.11262	3	-0.330711	0.0495135	0.0686718	0.570591	0.847534	FALSE	None
RAD54L2	3	-0.0900908	0.00359129	3	-0.0251445	0.0256705	0.0622513	0.56779	0.847534	FALSE	None
UBE2B	3	-0.0186711	0.0254308	3	0.0378481	0.00555822	0.0758501	0.421326	0.757135	FALSE	None
RAI1	3	-0.20786	0.0123595	3	-0.341722	0.00878841	-0.210583	0.0397109	0.301564	FALSE	None
RALGAPB	3	0.724032	0.0116985	3	0.475045	0.0249982	-0.110271	0.239957	0.612608	FALSE	None
RANBP1	3	-1.48304	0.143117	3	-1.15626	0.118591	0.0942637	0.522415	0.834053	FALSE	None
RAP1A	3	-0.150213	0.00762546	3	-0.00413853	0.00536931	0.132095	0.17031	0.534734	FALSE	None
RARB	3	-0.318923	0.0859914	3	-0.429548	0.0203499	-0.208016	0.13719	0.495875	FALSE	None
RB1	3	0.489867	0.00480055	3	0.601525	0.000342368	0.241337	0.0217676	0.233396	TRUE	None
RB1CC1	3	0.0373343	0.0823062	3	0.151639	0.0528109	0.151028	0.188002	0.556838	FALSE	None
RBM10	3	-0.279619	0.0383031	3	-0.151313	0.0387226	0.0750493	0.493927	0.81514	FALSE	None
RBM18	3	-0.126794	0.0437965	3	-0.259911	0.0499722	-0.178456	0.0957218	0.430658	FALSE	None
RBP1	3	-0.234886	0.0336974	3	-0.0494242	0.0609774	0.139532	0.435828	0.773026	FALSE	None
RECQL	3	0.0169746	0.126375	3	0.236195	0.00464663	0.256712	0.0318989	0.265696	TRUE	None
RECQL4	3	0.0311235	0.0957317	3	0.212458	0.0238246	0.226297	0.0436918	0.317473	FALSE	None
RECQL5	3	-0.0884807	0.0482639	3	-0.0402183	0.0043848	0.04791	0.713593	0.914675	FALSE	None
REST	3	-0.473898	0.102359	3	-0.466749	0.0915282	-0.111801	0.370582	0.71704	FALSE	None
RET	3	0.133332	0.023142	3	0.0814817	0.00722913	-0.00926841	0.928939	0.982678	FALSE	None
REV1	3	-0.658738	0.704649	3	-0.709419	0.960357	-0.180168	0.149184	0.509039	FALSE	None
REV3L	3	-0.839939	0.0443419	3	-0.691159	0.0547888	-0.0201055	0.813091	0.94829	FALSE	None
REXO2	3	-0.0135818	0.0540005	3	0.0922737	0.0113442	0.130111	0.198506	0.576195	FALSE	None
COP1	3	-0.348256	0.103602	3	-0.52162	0.0269038	-0.291511	0.0313359	0.265696	TRUE	None
RHBDD3	3	-0.182076	0.0340258	3	-0.0498579	0.00428189	0.111685	0.298542	0.664546	FALSE	None
RHNO1	3	-0.18048	0.0588488	3	0.0187006	0.00721401	0.188783	0.111305	0.466465	FALSE	None
RHOBTB1	3	-0.206821	0.0108655	3	-0.0682644	0.0296737	0.111876	0.268755	0.643581	FALSE	None
RIC8A	3	-1.39246	0.0267896	3	-0.744699	0.0231448	0.453292	0.00550362	0.12084	TRUE	None
RIF1	3	-0.619066	0.0820032	3	-0.557739	0.0320045	-0.083427	0.438388	0.773026	FALSE	None
RMI1	3	-0.551909	0.340225	3	-0.555945	0.19123	-0.125771	0.197945	0.576195	FALSE	None
RMI2	3	-0.141607	0.00473436	3	-0.12272	0.00285362	-0.0120297	0.896068	0.97315	FALSE	None
RMND1	3	-0.1218	0.0270915	3	-0.184953	0.0665048	-0.097399	0.376438	0.721446	FALSE	None
RNF10	3	-0.149788	0.0280248	3	-0.247858	0.0720485	-0.150599	0.18887	0.557774	FALSE	None
RNF103	3	0.142832	0.0370031	3	-0.07127	0.0242009	-0.181331	0.299786	0.664546	FALSE	None
RNF11	3	-0.322564	0.108025	3	-0.30754	0.0259489	-0.0676503	0.558651	0.847534	FALSE	None
RNF111	3	-0.0287462	0.0285919	3	0.0401599	0.00247918	0.0903497	0.345307	0.696129	FALSE	None
RNF112	3	-0.0748877	0.00764889	3	-0.0297246	0.00808249	0.0364557	0.711453	0.914675	FALSE	None
RNF113B	3	0.123423	0.0045845	3	0.0425099	0.014658	-0.0411121	0.685782	0.904229	FALSE	None
RNF114	3	-0.139906	0.0877593	3	-0.216512	0.0759518	-0.118657	0.269058	0.643581	FALSE	None
RNF115	3	-0.356361	0.0265107	3	-0.292418	0.00201785	-0.0309627	0.77828	0.9418	FALSE	None
RNF121	3	-0.213192	0.0305492	3	-0.190112	0.0146398	-0.0366469	0.704264	0.914675	FALSE	None
RNF122	3	-0.00681084	0.00102456	3	0.0253139	0.00404071	0.057396	0.568341	0.847534	FALSE	None
RNF123	3	-0.263371	0.0274228	3	-0.308131	0.0832585	-0.130508	0.336143	0.684485	FALSE	None
RNF125	3	0.0643936	0.0160963	3	0.079326	0.0191088	0.0579742	0.521591	0.834053	FALSE	None
RNF126	3	0.182885	0.00943933	3	0.154234	0.0397793	0.0432891	0.703547	0.914675	FALSE	None
RNF128	3	-0.0781401	0.0631774	3	0.0291495	0.0488185	0.120581	0.197166	0.576195	FALSE	None
RNF13	3	-0.128185	0.0797806	3	-0.354092	0.0371382	-0.293875	0.0138402	0.192847	TRUE	None
RNF130	3	-0.243256	0.10111	3	-0.0803389	0.010847	0.117075	0.388674	0.733759	FALSE	None
RNF133	3	0.0874128	0.0107666	3	0.0508857	0.015545	0.00208055	0.981558	0.996887	FALSE	None
RNF135	3	-0.104471	0.000367893	3	-0.103358	0.00960847	-0.0230643	0.849989	0.958263	FALSE	None
RNF138	3	-0.0442724	0.0814163	3	0.0864144	0.0616252	0.140925	0.113377	0.467392	FALSE	None
RNF139	3	-0.136375	0.196689	3	-0.169071	0.0320617	-0.0693238	0.607197	0.87359	FALSE	None
RNF14	3	-0.218356	0.009705	3	-0.200133	0.0352524	-0.0426775	0.629	0.883645	FALSE	None
RNF141	3	0.00159937	0.0379335	3	-0.0333234	0.0185838	-0.0232332	0.793656	0.944362	FALSE	None
RNF144B	3	-0.257144	0.0974541	3	-0.215874	0.0567674	-0.0142203	0.870295	0.964857	FALSE	None
RNF145	3	-0.395149	0.00669929	3	-0.326802	0.24302	-0.0234409	0.86179	0.961804	FALSE	None
RNF146	3	0.34451	0.0161089	3	0.138006	0.0737328	-0.135503	0.230538	0.60322	FALSE	None
RNF148	3	-0.191314	0.0487304	3	-0.133132	0.0337295	0.010684	0.916275	0.982585	FALSE	None
RNF149	3	-0.145197	0.173916	3	-0.257865	0.126264	-0.158564	0.133032	0.495803	FALSE	None
RNF150	3	0.0276446	0.0252245	3	0.0115011	0.00791679	0.0122008	0.917185	0.982585	FALSE	None
RNF151	3	-0.0831125	0.0472285	3	-0.00326188	0.0392495	0.076671	0.446582	0.781103	FALSE	None
RNF152	3	0.0525453	0.0616499	3	0.0283955	0.0102948	-0.00134443	0.990188	0.996887	FALSE	None
RNF157	3	0.116161	0.0907029	3	0.0608217	0.00451795	-0.0136178	0.900648	0.974978	FALSE	None
RNF165	3	0.0973862	0.237965	3	0.0726604	0.105153	-0.00145672	0.987919	0.996887	FALSE	None
RNF166	3	0.0304581	0.12191	3	-0.0254632	0.013467	-0.0318738	0.823191	0.94829	FALSE	None
RNF167	3	-0.236283	0.0397925	3	-0.02445	0.0467022	0.186311	0.0732972	0.389632	FALSE	None
RNF168	3	-0.482436	0.129803	3	-0.168229	0.0754676	0.231437	0.0435655	0.317473	FALSE	None
RNF169	3	-0.238124	0.0577029	3	-0.144643	0.0386924	0.0402817	0.618891	0.878049	FALSE	None
RNF17	3	-0.122939	0.0191383	3	-0.093957	0.0137281	0.00533022	0.953629	0.988876	FALSE	None
RNF170	3	0.031518	0.00974149	3	0.106464	0.00041582	0.113401	0.316258	0.67712	FALSE	None
RNF175	3	0.0712474	0.018496	3	0.0347608	0.000123038	-0.00536032	0.959857	0.991532	FALSE	None
RNF180	3	-0.228425	0.164097	3	-0.208433	0.0867866	-0.025339	0.799203	0.946301	FALSE	None
RNF181	3	-0.108631	0.0210043	3	-0.40935	0.000537236	-0.381937	0.000626724	0.0316496	TRUE	None
RNF182	3	0.131347	0.0480425	3	-0.00742338	0.00779213	-0.106848	0.284082	0.658526	FALSE	None
RNF183	3	-0.287286	0.0623628	3	-0.249842	0.0258635	-0.0358786	0.774783	0.9418	FALSE	None
RNF185	3	-0.466005	0.024369	3	-0.266844	0.0533216	0.0961809	0.393712	0.737753	FALSE	None
RNF186	3	-0.075598	0.0229709	3	-0.1475	0.00984186	-0.0932941	0.375679	0.721446	FALSE	None
RNF187	3	0.00792779	0.0309807	3	0.139382	0.0233121	0.16349	0.114653	0.470731	FALSE	None
RNF19A	3	-0.231553	0.00642506	3	-0.050901	0.0222314	0.14031	0.182981	0.546906	FALSE	None
RNF19B	3	-0.235466	0.0531452	3	-0.239183	0.0814202	-0.0554755	0.651505	0.88682	FALSE	None
RNF2	3	0.179404	0.0702651	3	0.10259	0.0101585	-0.0284037	0.785182	0.9418	FALSE	None
RNF207	3	-0.292313	0.0807643	3	0.0105584	0.0595994	0.267143	0.00912461	0.157334	TRUE	None
RNF208	3	-0.0657755	0.0606546	3	-0.0389951	0.00748664	0.0259601	0.814925	0.94829	FALSE	None
RNF212	3	-0.224694	0.0205853	3	-0.0590068	0.00944251	0.127395	0.241184	0.612608	FALSE	None
RNF213	3	-0.226688	0.118623	3	-0.222311	0.0430448	-0.0469089	0.637608	0.884547	FALSE	None
RNF214	3	0.360304	0.116084	3	0.0779786	0.0181491	-0.214259	0.0947285	0.430658	FALSE	None
RNF215	3	-0.48854	0.0936413	3	-0.263049	0.00520605	0.117733	0.417541	0.756521	FALSE	None
RNF216	3	-0.271159	0.0202849	3	-0.366197	0.00251894	-0.190822	0.0464981	0.326132	FALSE	None
RNF217	3	-0.458288	0.00409534	3	-0.376354	0.0115512	-0.0476664	0.642514	0.884955	FALSE	None
OBI1	3	-0.0351176	0.00866223	3	0.0947272	0.0760938	0.15	0.203624	0.585927	FALSE	None
RNF220	3	-0.04702	0.0785708	3	-0.0651415	0.0572874	-0.0207338	0.8378	0.951587	FALSE	None
RNF222	3	-0.121006	0.0202143	3	-0.175267	0.0266739	-0.0897061	0.384018	0.729202	FALSE	None
RNF223	3	-0.142345	0.000956954	3	-0.144691	0.0478044	-0.0358773	0.767721	0.9418	FALSE	None
RNF24	3	-0.00331959	0.00284234	3	0.142614	0.0166958	0.188332	0.150579	0.510353	FALSE	None
RNF25	3	-0.676971	0.0544912	3	-0.513481	0.0414268	0.0131493	0.899548	0.974832	FALSE	None
RNF26	3	-0.154127	0.0656601	3	0.0143605	0.027649	0.17211	0.24602	0.618111	FALSE	None
RNF31	3	-0.554907	0.178877	3	-0.492575	0.0102766	-0.0683116	0.572425	0.847534	FALSE	None
RNF32	3	-0.0963263	0.00365347	3	0.108941	0.0435159	0.229867	0.0375263	0.298999	TRUE	None
RNF34	3	-0.000530213	0.0348456	3	-0.0356764	0.0343482	-0.0356092	0.705308	0.914675	FALSE	None
RNF38	3	-0.17095	0.140035	3	-0.195596	0.099527	-0.0650086	0.573973	0.847534	FALSE	None
RNF39	3	-0.257069	0.0189509	3	-0.314927	0.0174349	-0.143928	0.219502	0.59713	FALSE	None
RNF4	3	-0.524119	0.0849163	3	-0.59545	0.0903753	-0.202416	0.0455129	0.325512	FALSE	None
RNF40	3	-1.15449	0.207635	3	-1.49772	0.0346646	-0.553796	0.00169927	0.0555556	TRUE	None
RNF41	3	-0.19705	0.00324412	3	-0.0927156	0.0143291	0.0731089	0.385239	0.730003	FALSE	None
RNF43	3	-0.39354	0.0225356	3	-0.144916	0.148019	0.180641	0.205623	0.587133	FALSE	None
RNF44	3	-0.0659479	0.00398947	3	-0.0392058	0.0335334	0.0236748	0.812964	0.94829	FALSE	None
RNF5	3	-0.493561	0.538261	3	-0.622964	0.708054	-0.230197	0.0624783	0.377863	FALSE	None
RNF6	3	0.0642433	0.0238566	3	0.00887244	0.0154259	-0.0167364	0.884644	0.969581	FALSE	None
RNF7	3	0.0283534	1.1015	3	-0.195566	1.55711	-0.210244	0.176865	0.546414	FALSE	None
RNF8	3	-0.587906	0.246559	3	-0.796553	0.483998	-0.367148	0.0098133	0.159837	TRUE	None
RNH1	3	-0.344798	0.0103836	3	-0.103064	0.00490945	0.178126	0.0685767	0.37886	FALSE	None
ROBO1	3	-0.0357814	0.0282481	3	0.101162	0.00346435	0.169869	0.0708534	0.37886	FALSE	None
ROBO2	3	-0.0864706	0.136188	3	0.0949167	0.00350252	0.198794	0.132391	0.495242	FALSE	None
ROCK2	3	0.013214	0.0585233	3	0.275653	0.0565098	0.307485	0.00567354	0.121921	TRUE	None
ROR2	3	-0.275099	0.287192	3	-0.342037	0.127949	-0.142454	0.162169	0.523292	FALSE	None
RPA1	3	-2.97259	0.792052	3	-2.88578	2.68138	-0.515921	0.102904	0.444158	FALSE	None
RPA2	3	-2.71842	0.307869	3	-2.41763	0.545715	-0.118387	0.418708	0.756521	FALSE	None
RPA3	3	-2.2695	3.1626	3	-1.77737	3.33998	0.139187	0.300541	0.664546	FALSE	None
RPL36	3	-1.92025	0.48278	3	-1.80429	0.383332	-0.183087	0.375964	0.721446	FALSE	None
RPP25L	3	-1.55009	0.432033	3	-1.31241	0.0803212	-0.0207562	0.879045	0.968766	FALSE	None
RPS25	3	-2.79078	1.67988	3	-1.9654	1.38584	0.3732	0.0569497	0.361756	FALSE	None
RPS3	3	-3.10657	1.91453	3	-2.53638	0.982208	0.0136085	0.948874	0.987727	FALSE	None
RPS6KB1	3	-0.345147	0.02635	3	-0.186476	0.0137045	0.0821377	0.523083	0.834053	FALSE	None
RPSA	3	-5.30834	0.929038	3	-4.25677	0.541557	-0.460303	0.166065	0.532462	FALSE	None
RPUSD3	3	-0.431161	0.00551997	3	-0.267262	0.0615949	0.0639601	0.557236	0.847534	FALSE	None
CNOT9	3	-0.569853	0.131783	3	-0.467316	0.107684	-0.0153857	0.87461	0.966472	FALSE	None
RRAGA	3	-0.470588	0.0943089	3	-0.497178	0.114358	-0.14889	0.131474	0.493638	FALSE	None
RUNX1	3	1.044	0.132249	3	1.11702	0.0872423	0.30203	0.00682445	0.13778	TRUE	None
RWDD1	3	-0.210807	0.0619663	3	-0.248678	0.0149699	-0.107025	0.281167	0.654328	FALSE	None
SAP30	3	0.250289	0.0074243	3	0.327428	0.00346184	0.169115	0.0578544	0.365206	FALSE	None
SART3	3	-2.97821	0.377104	3	-2.71537	0.238066	-0.227447	0.184837	0.550243	FALSE	None
SBDS	3	-1.85337	0.151516	3	-1.11467	0.00801501	0.484815	0.00695723	0.13778	TRUE	None
SCAP	3	-2.06385	0.139385	3	-1.66645	0.0541727	0.0875095	0.523554	0.834053	FALSE	None
SCAPER	3	-0.049738	0.00171437	3	-0.229233	0.0757316	-0.217416	0.102196	0.442994	FALSE	None
SCD	3	-1.37198	0.101882	3	-0.996037	0.0297661	0.150136	0.124929	0.486247	FALSE	None
SCNM1	3	-0.339754	0.0862177	3	-1.35304	2.88175	-1.1679	0.00967314	0.159837	TRUE	Negative
SDHB	3	-0.262078	0.0512962	3	-0.242441	0.13732	-0.0498714	0.663783	0.890333	FALSE	None
SDHD	3	-0.155079	0.0812578	3	-0.135042	0.0143064	-0.0171479	0.89291	0.97181	FALSE	None
SDK1	3	-0.0172503	0.189718	3	-0.0989865	0.073646	-0.100102	0.296598	0.664546	FALSE	None
SEMA3A	3	0.462389	0.0706117	3	0.371556	0.0341879	0.0177931	0.826532	0.94829	FALSE	None
SEMA3E	3	0.047692	0.0591717	3	-0.00861315	3.3695e-06	-0.0242183	0.825576	0.94829	FALSE	None
SENP1	3	-0.161576	0.0731107	3	-0.077086	0.0516645	0.0443017	0.724129	0.923448	FALSE	None
SENP2	3	-0.167185	0.0806766	3	-0.0863195	0.021214	0.0578406	0.646142	0.884955	FALSE	None
SEPHS1	3	-0.555899	0.0137645	3	-0.513905	0.0327959	-0.0917253	0.476788	0.802922	FALSE	None
SEPHS2	3	-0.0630351	0.0322454	3	-0.137899	0.0318632	-0.0932403	0.495646	0.816644	FALSE	None
SEPTIN11	3	0.075672	0.0786483	3	0.0346063	0.00716936	-0.0132646	0.899332	0.974832	FALSE	None
SERPIND1	3	-0.555223	0.0112117	3	-0.200146	0.00486497	0.252758	0.0308228	0.265696	TRUE	None
SETD1B	3	0.683246	0.00513919	3	0.663463	0.0157664	0.13146	0.141098	0.497527	FALSE	None
SETD2	3	-0.881062	0.252334	3	-0.578772	0.162993	0.145499	0.212655	0.594341	FALSE	None
KMT5A	3	-0.38945	0.408484	3	-0.536363	0.0751764	-0.242846	0.0632198	0.37886	FALSE	None
SETDB1	3	0.392613	0.00343375	3	0.271236	0.0323558	-0.0271447	0.802123	0.94829	FALSE	None
RSKR	3	-0.555366	0.040242	3	-0.390863	0.00412269	0.0424964	0.740853	0.936498	FALSE	None
SGSM2	3	-0.317281	0.0614811	3	-0.137835	0.00757427	0.115755	0.250113	0.619549	FALSE	None
SHKBP1	3	0.0636698	0.0240707	3	0.122314	0.025459	0.101009	0.302664	0.664546	FALSE	None
SHMT1	3	-0.0126863	0.0123356	3	-0.158148	0.00912751	-0.163039	0.0990505	0.440709	FALSE	None
SHMT2	3	-0.0879591	0.098143	3	-0.0974643	0.0817572	-0.0244475	0.779969	0.9418	FALSE	None
SHPRH	3	-0.115016	0.0264331	3	-0.0496076	0.0493937	0.0453407	0.662033	0.889778	FALSE	None
SIRT6	3	0.201797	0.0047282	3	0.121214	0.0007246	-0.0227728	0.86179	0.961804	FALSE	None
SKI	3	-0.338592	0.0724853	3	-0.330306	0.0466172	-0.0821388	0.42789	0.766257	FALSE	None
SLC16A1	3	-0.0528575	0.031854	3	0.00221838	0.0345373	0.0538914	0.570967	0.847534	FALSE	None
SLC16A10	3	-0.000506298	0.0067756	3	-0.0304539	0.00140274	-0.017744	0.849578	0.958263	FALSE	None
SLC16A3	3	0.0711195	0.0181805	3	0.0789439	0.00291103	0.0434	0.63493	0.883645	FALSE	None
SLC1A5	3	-0.172345	0.120547	3	-0.11538	0.0690723	0.0265291	0.853234	0.95965	FALSE	None
SLC20A1	3	-0.299283	0.0691932	3	0.0106865	0.0274006	0.279742	0.0250348	0.241338	TRUE	None
SLC25A1	3	-0.250756	0.00670343	3	-0.295304	0.0302382	-0.124512	0.172667	0.536595	FALSE	None
SLC25A28	3	-0.196933	0.0213098	3	-0.311613	0.0105465	-0.186706	0.129118	0.489807	FALSE	None
SLC25A32	3	-0.309899	0.0665922	3	-0.198038	0.0258376	0.0386037	0.64663	0.884955	FALSE	None
SLC25A37	3	-0.107096	0.0114924	3	0.0526758	0.00477991	0.16645	0.0759489	0.39409	FALSE	None
SLC26A6	3	-0.139723	0.0725915	3	-0.136249	0.0698521	-0.030468	0.768107	0.9418	FALSE	None
SLC2A1	3	-0.35068	0.020298	3	-0.474749	0.0319587	-0.235172	0.0669278	0.37886	FALSE	None
SLC33A1	3	-0.144502	0.0992592	3	0.0752964	0.0324718	0.211003	0.0491314	0.333107	FALSE	None
SLC35A1	3	-0.176728	0.0175987	3	-0.0985847	0.0271503	0.0409489	0.691119	0.906532	FALSE	None
SLC35B2	3	-0.134692	0.0835314	3	-0.224921	0.0159494	-0.128977	0.214509	0.594341	FALSE	None
SLC38A2	3	-0.270394	0.00517284	3	-0.203969	0.00126903	-0.00147179	0.986775	0.996887	FALSE	None
SLC39A9	3	0.209492	0.107772	3	0.210478	0.170306	0.0520455	0.610648	0.87359	FALSE	None
SLC3A2	3	-0.605423	0.104561	3	-0.470033	0.0233831	-0.00840058	0.960117	0.991532	FALSE	None
SLC4A2	3	0.0305669	0.00451966	3	0.176303	0.00357638	0.188198	0.147107	0.505367	FALSE	None
SLC7A1	3	-0.0601359	0.0459352	3	-0.152816	0.0145135	-0.11419	0.2875	0.659944	FALSE	None
SLC7A11	3	-0.316357	0.0596427	3	-0.236971	0.0516753	-0.000975002	0.992118	0.996887	FALSE	None
SLC7A5	3	-0.45818	0.0699611	3	-0.292136	0.234222	0.0770201	0.511218	0.828781	FALSE	None
GINS4	3	-1.05534	0.726589	3	-0.848703	0.862114	0.0532268	0.685107	0.904229	FALSE	None
SLFN11	3	-0.29472	0.0903605	3	-0.120158	0.0289478	0.117387	0.208038	0.590221	FALSE	None
SLIT2	3	0.0785036	0.000917058	3	0.0487764	0.00742887	0.0145109	0.865153	0.962988	FALSE	None
SLX1A	3	-0.232759	0.00319279	3	-0.160195	0.0290166	0.0308995	0.815816	0.94829	FALSE	None
SLX4	3	-1.21774	0.256811	3	-0.764297	0.0784872	0.264163	0.0147355	0.194062	TRUE	None
SMAD2	3	0.0794596	0.00842319	3	0.0542607	0.00876075	0.0210602	0.830608	0.949166	FALSE	None
SMAD4	3	-0.467705	0.040686	3	0.0516288	0.0644731	0.460365	0.00132696	0.0478655	TRUE	None
SMARCA1	3	0.0952039	0.0167246	3	0.0847398	0.0141194	0.0246608	0.771164	0.9418	FALSE	None
SMARCA4	3	0.0318861	0.0766205	3	-0.00924567	0.000901699	-0.021923	0.831858	0.949166	FALSE	None
SMARCAL1	3	0.0299696	0.057444	3	-0.0600042	0.0297543	-0.0872722	0.40658	0.749354	FALSE	None
SMARCB1	3	-1.63321	0.203838	3	-0.952524	0.191361	0.4357	0.00306209	0.0793003	TRUE	None
SMARCC1	3	-0.266835	0.0335956	3	-0.212886	0.057709	-0.0173328	0.881682	0.969446	FALSE	None
SMARCD1	3	0.356158	0.0934745	3	0.330148	0.097544	0.0660025	0.499835	0.819535	FALSE	None
PPP4R3A	3	-0.0251637	0.104041	3	-0.13822	0.100622	-0.133019	0.129968	0.489807	FALSE	None
SNAP23	3	-0.1548	0.0120051	3	-0.507621	0.0154783	-0.454744	0.000407586	0.0228701	TRUE	None
SOD2	3	-0.398769	0.00481673	3	-0.0655542	0.0127912	0.26284	0.0140069	0.192847	TRUE	None
SOX2	3	0.0112444	0.0208754	3	-0.0488094	0.00822524	-0.0451345	0.677497	0.902568	FALSE	None
SOX9	3	-0.305438	0.0550999	3	-0.340665	0.219101	-0.115739	0.317265	0.67712	FALSE	None
SPEN	3	-0.962195	0.0728046	3	-0.661788	0.227503	0.119782	0.441675	0.775812	FALSE	None
SPOP	3	0.191896	0.06659	3	-0.0178929	0.122852	-0.186696	0.136974	0.495875	FALSE	None
SPTLC2	3	-1.2464	0.204319	3	-0.70097	0.0685094	0.350766	0.00295443	0.0785255	TRUE	None
SRM	3	-0.335034	0.0732544	3	-0.172508	0.0527926	0.0951964	0.370589	0.71704	FALSE	None
SRPRA	3	-1.70304	3.29525	3	-1.77306	2.59966	-0.425022	0.0043793	0.102863	TRUE	None
SRSF5	3	0.00443907	0.0270104	3	-0.178393	0.00316483	-0.190775	0.125172	0.486247	FALSE	None
NABP2	3	-0.133575	0.0279687	3	-0.0434662	0.0330524	0.074749	0.449602	0.78428	FALSE	None
NABP1	3	-0.204776	0.00266543	3	-0.139145	0.00999201	0.02817	0.771807	0.9418	FALSE	None
SSBP1	3	-0.0984211	0.0562641	3	-0.0657073	0.0159788	0.0269542	0.75533	0.941403	FALSE	None
SSR3	3	-0.45498	0.0396886	3	-0.303262	0.00428956	0.0424022	0.773494	0.9418	FALSE	None
STAG1	3	-0.0848649	0.0441569	3	0.103936	0.0232168	0.200336	0.0391124	0.301554	FALSE	None
STAG2	3	0.383491	0.010232	3	0.379898	0.0073161	0.0953014	0.300302	0.664546	FALSE	None
STIP1	3	0.389033	0.0467802	3	0.441675	0.000776494	0.162582	0.10874	0.463408	FALSE	None
STK11	3	-1.87897	0.762768	3	-1.78804	1.68981	-0.223611	0.361007	0.710754	FALSE	None
STOML2	3	-0.227523	0.0147648	3	-0.1069	0.00564381	0.0722706	0.505356	0.823336	FALSE	None
CENPX	3	-0.254198	0.012305	3	-0.111998	0.0593858	0.0889137	0.513212	0.830679	FALSE	None
STRAP	3	-2.69921	0.0548827	3	-2.22178	0.00735696	0.0912829	0.713628	0.914675	FALSE	None
STT3A	3	-0.589056	0.0265675	3	-0.35075	0.0164427	0.109444	0.299283	0.664546	FALSE	None
STUB1	3	-1.13249	0.0352726	3	-0.758266	0.00555978	0.185142	0.0849073	0.416293	FALSE	None
STX4	3	-0.0418489	0.00276247	3	0.00508169	0.00452209	0.0567399	0.560986	0.847534	FALSE	None
SUMO1	3	-0.402974	0.441221	3	-0.141711	0.218597	0.226098	0.141869	0.497527	FALSE	None
SUMO2	3	-0.198007	0.00894736	3	-0.194847	0.0289182	-0.0440846	0.651251	0.88682	FALSE	None
SUMO3	3	-0.120725	0.0163327	3	0.102981	0.013982	0.237286	0.079126	0.39871	FALSE	None
SUPT20H	3	-0.131197	0.0709247	3	0.0180088	0.0355507	0.142674	0.169715	0.534734	FALSE	None
SURF1	3	-0.546297	0.103855	3	-0.173246	0.0408333	0.286678	0.0651241	0.37886	FALSE	None
SUV39H1	3	-0.532965	0.0343501	3	-0.231643	0.0189074	0.191316	0.0708955	0.37886	FALSE	None
SUZ12	3	-0.00852485	0.188034	3	-0.0177002	0.0478277	-0.00653843	0.96522	0.995635	FALSE	None
SYVN1	3	-0.507139	0.00632902	3	-0.501993	0.104028	-0.131559	0.330103	0.68116	FALSE	None
TACO1	3	-0.28373	0.0400697	3	-0.13745	0.0161505	0.086381	0.338269	0.687428	FALSE	None
TADA1	3	0.0146144	0.00957284	3	0.210375	0.0499069	0.242104	0.0764183	0.39409	FALSE	None
TADA2B	3	-0.168625	4.85731e-06	3	-0.0916226	0.00825808	0.0454309	0.635289	0.883645	FALSE	None
TAF4	3	-1.03557	0.0621483	3	-1.14458	0.110653	-0.320789	0.0143203	0.192847	TRUE	None
TAF5L	3	0.138866	0.0146147	3	0.307567	0.0281399	0.242214	0.0142327	0.192847	TRUE	None
TANK	3	-0.470517	0.0756091	3	-0.266638	0.0502823	0.111379	0.25629	0.628285	FALSE	None
TAOK1	3	1.19536	0.0269452	3	0.99963	0.0169195	0.029526	0.777967	0.9418	FALSE	None
TAPT1	3	-0.19663	0.0457885	3	-0.310434	0.0208479	-0.189049	0.0828034	0.407958	FALSE	None
WWTR1	3	-0.33395	0.0152467	3	-0.0866119	0.0562582	0.179236	0.169182	0.534734	FALSE	None
TEAD4	3	-0.616287	0.0116529	3	-0.305805	0.0164068	0.184678	0.0656116	0.37886	FALSE	None
TECR	3	-0.498646	0.0477895	3	-0.359803	0.0913623	0.0297615	0.78412	0.9418	FALSE	None
TELO2	3	-1.43981	0.0967589	3	-0.918374	0.0165316	0.295523	0.0554478	0.356703	FALSE	None
TEN1	3	-0.407514	0.00712485	3	-0.27391	0.00895438	0.0241799	0.806789	0.94829	FALSE	None
TERT	3	-0.440125	0.0374668	3	-0.182976	0.00228491	0.178418	0.135488	0.495875	FALSE	None
TET2	3	-0.175701	0.00295195	3	-0.0341268	0.00419458	0.117646	0.256186	0.628285	FALSE	None
TFAP4	3	-0.166191	0.761296	3	-0.114579	0.769528	0.0429846	0.763446	0.9418	FALSE	None
TFDP1	3	-0.788806	0.236807	3	-0.669409	0.180282	-0.0377633	0.709454	0.914675	FALSE	None
TFPT	3	-0.449443	0.030614	3	-0.301347	0.0183185	0.0497437	0.677496	0.902568	FALSE	None
TFRC	3	-0.00484255	0.0360774	3	-0.0297888	0.00222509	-0.0108639	0.918521	0.982585	FALSE	None
TGFBR2	3	-0.269668	0.0430281	3	0.0105004	0.0590759	0.249129	0.0708944	0.37886	FALSE	None
TGIF2	3	-0.238469	0.0360476	3	-0.226815	0.00144698	-0.0566861	0.561214	0.847534	FALSE	None
THAP10	3	-0.0455449	0.1242	3	-0.293182	0.0224557	-0.284902	0.00549928	0.12084	TRUE	None
THAP3	3	-0.244082	0.0947458	3	-0.0393261	0.0914776	0.168955	0.0704414	0.37886	FALSE	None
TIMM17A	3	-0.701937	0.164056	3	-0.337611	0.0079293	0.234302	0.105925	0.455253	FALSE	None
TIMM8A	3	-0.549667	0.260453	3	-0.365562	0.0175108	0.065051	0.559168	0.847534	FALSE	None
TIMM8B	3	-0.692506	0.117413	3	-0.308233	0.0570401	0.260102	0.0199684	0.219218	TRUE	None
TIMMDC1	3	-0.152688	0.024696	3	-0.133489	0.0435837	-0.00895101	0.94667	0.987727	FALSE	None
TINF2	3	-1.06289	0.46207	3	-0.934407	0.302031	-0.0667325	0.498617	0.818867	FALSE	None
TIPARP	3	-3.22124	1.00042	3	-2.52843	0.633173	0.127821	0.532462	0.838981	FALSE	None
TIPIN	3	-1.89576	3.66014	3	-1.68229	2.67262	-0.110734	0.525788	0.834446	FALSE	None
TIPRL	3	-0.44354	0.212386	3	-0.0378318	0.0635665	0.350171	0.000868425	0.0365462	TRUE	None
TKT	3	-0.326315	0.140735	3	-0.0823998	0.0281183	0.188424	0.113066	0.467392	FALSE	None
TLCD1	3	-0.606341	0.0731772	3	-0.545397	0.085617	-0.0773072	0.528716	0.836488	FALSE	None
TM2D1	3	-0.105551	0.043722	3	-0.171623	0.0639365	-0.091638	0.347609	0.696546	FALSE	None
TM2D2	3	-0.210389	0.00108477	3	-0.152286	0.0181978	0.0087	0.924934	0.982678	FALSE	None
TM2D3	3	-0.242374	0.00520798	3	-0.218633	0.00982766	-0.0419485	0.657078	0.889778	FALSE	None
TMCO1	3	-0.0251995	0.00520548	3	-0.121849	0.0115139	-0.103421	0.261927	0.637461	FALSE	None
TMEM165	3	0.0770769	0.0834631	3	0.0854461	0.0784262	0.0310142	0.805687	0.94829	FALSE	None
TMEM208	3	0.126409	0.0612134	3	0.0320059	0.0115741	-0.0603024	0.559162	0.847534	FALSE	None
TNKS	3	-0.36386	0.00437157	3	-0.236413	0.00934661	0.0418177	0.716855	0.917647	FALSE	None
TNPO1	3	-2.15133	0.0104813	3	-1.56425	0.0405816	0.257367	0.0962207	0.430658	FALSE	None
TOMM70	3	-0.436058	0.0466343	3	-0.526149	0.0911521	-0.21608	0.0411793	0.310381	FALSE	None
TOPBP1	3	-4.01719	2.2466	3	-3.54191	2.15481	-0.487405	0.205918	0.587133	FALSE	None
TP53	3	-0.572065	0.855944	3	-0.342048	0.444627	0.17024	0.144021	0.502265	FALSE	None
TP53BP1	3	-0.319115	0.098632	3	-0.379656	0.00575237	-0.155633	0.211335	0.594341	FALSE	None
TP73	3	0.148803	0.00656807	3	0.0931139	0.0634802	-0.00998788	0.921996	0.982678	FALSE	None
TPGS1	3	0.12948	0.0373029	3	0.00225652	0.0346666	-0.0968668	0.38284	0.729202	FALSE	None
TPP1	3	-0.261548	0.202652	3	-0.202887	0.0154532	0.00880844	0.949338	0.987727	FALSE	None
TPT1	3	-1.7481	0.129724	3	-1.23022	0.103154	0.261476	0.0502615	0.335502	FALSE	None
TREX1	3	-0.294135	0.250989	3	-0.181152	0.00830619	0.0610563	0.684475	0.904229	FALSE	None
TERF1	3	-0.140483	0.0626204	3	-0.20908	0.0518372	-0.108634	0.248405	0.619479	FALSE	None
TERF2	3	-1.9934	1.15219	3	-1.63499	0.999366	0.0500492	0.796575	0.946301	FALSE	None
TRIM28	3	-0.417694	0.0970436	3	-0.241275	0.0715214	0.102013	0.490913	0.812504	FALSE	None
TRIM37	3	-0.612892	0.0462958	3	-0.523898	0.119143	-0.0537192	0.63845	0.884547	FALSE	None
TRIM71	3	-0.0254917	0.038581	3	0.0205633	0.110062	0.0495205	0.659513	0.889778	FALSE	None
TRUB2	3	-0.396337	0.024365	3	-0.315693	0.0322365	-0.0280299	0.787347	0.9418	FALSE	None
TSC1	3	0.790492	0.0693506	3	0.75174	0.125335	0.130479	0.168974	0.534734	FALSE	None
TSC2	3	0.918758	8.7249e-05	3	0.795436	0.012001	0.0562605	0.564885	0.847534	FALSE	None
TSPYL2	3	-0.127684	0.0356293	3	-0.0110355	0.00155182	0.106635	0.301608	0.664546	FALSE	None
EIPR1	3	-0.628433	0.091207	3	-0.49283	0.0696281	0.0026807	0.983313	0.996887	FALSE	None
TTC4	3	-1.00056	0.07611	3	-0.569482	0.0113931	0.257577	0.0516286	0.336419	FALSE	None
TUB	3	-0.134473	0.00819572	3	-0.139104	0.0345447	-0.0384119	0.743766	0.938053	FALSE	None
TXNDC17	3	-0.505433	0.108732	3	-0.453032	0.0779959	-0.069175	0.556039	0.847534	FALSE	None
TYRO3	3	-0.210799	0.0904962	3	-0.408201	0.28303	-0.255318	0.0600085	0.374127	FALSE	None
UBA5	3	-0.321456	0.0390133	3	-0.117828	0.0473651	0.138423	0.307917	0.665945	FALSE	None
UBE2C	3	-0.72254	0.00970433	3	-1.22942	0.0608807	-0.698185	0.00154091	0.0536662	TRUE	None
UBE2G2	3	-0.420233	0.0644506	3	-0.258926	0.0244952	0.0628569	0.530052	0.836488	FALSE	None
UBE2H	3	-0.345594	0.0310602	3	-0.326298	0.0298029	-0.0815284	0.421062	0.757135	FALSE	None
UBE2I	3	-2.76231	0.057197	3	-2.71495	0.00186414	-0.416473	0.0292917	0.261811	TRUE	None
UBE2J2	3	-0.346622	0.0258733	3	-0.275488	0.00757157	-0.0264615	0.797985	0.946301	FALSE	None
UBE2K	3	0.137459	0.00575149	3	0.210274	0.00295337	0.13965	0.10793	0.461905	FALSE	None
UBE2T	3	-0.556192	0.00112371	3	-0.272939	0.012231	0.162892	0.146817	0.505367	FALSE	None
UBE2V2	3	-0.203683	0.0951801	3	-0.188187	0.00502133	-0.038462	0.75434	0.941403	FALSE	None
UCHL5	3	-0.408666	0.045738	3	-0.413108	0.136239	-0.113437	0.347836	0.696546	FALSE	None
UCK1	3	-0.0934185	0.0129799	3	-0.173851	0.00827033	-0.109703	0.275988	0.647972	FALSE	None
UFSP2	3	-0.0605003	0.0436345	3	0.0281277	0.00238601	0.0929924	0.335449	0.684452	FALSE	None
UGP2	3	-0.184516	0.00201411	3	-0.202667	0.00538912	-0.0712252	0.488003	0.810664	FALSE	None
UNG	3	-0.163956	0.0113934	3	-0.10365	0.0424366	0.0259229	0.814927	0.94829	FALSE	None
UPF3A	3	-0.39668	0.0809311	3	-0.638453	0.142177	-0.361749	0.00834118	0.1478	TRUE	None
UROS	3	-0.159645	0.004277	3	-0.0887117	0.00919008	0.0473631	0.655304	0.889778	FALSE	None
USP1	3	-0.630369	0.0301105	3	-0.395451	0.0145664	0.0897478	0.456299	0.789146	FALSE	None
USP10	3	-0.448217	0.0504668	3	-0.775943	0.0927702	-0.475779	0.000127132	0.00987714	TRUE	None
USP14	3	-0.0624091	0.0459185	3	0.145408	0.00476485	0.239607	0.0460874	0.325512	FALSE	None
USP15	3	-0.796831	2.03251	3	-0.749125	3.23615	-0.0578044	0.76601	0.9418	FALSE	None
USP2	3	-0.309171	0.100789	3	-0.131458	0.0483621	0.113086	0.401212	0.74353	FALSE	None
USP28	3	-0.216032	0.0661228	3	-0.0528849	0.0477191	0.132558	0.206369	0.587133	FALSE	None
USP30	3	-0.258904	0.030385	3	-0.167254	0.0169075	0.0336543	0.747358	0.938846	FALSE	None
USP33	3	0.00190022	0.0175098	3	-0.168572	0.0175925	-0.177801	0.0682741	0.37886	FALSE	None
USP36	3	-1.03004	0.619998	3	-0.990663	0.971936	-0.136676	0.467973	0.7984	FALSE	None
USP7	3	0.622541	0.161757	3	0.438385	0.020656	-0.0560179	0.594038	0.863	FALSE	None
USP9X	3	-0.184867	0.0109552	3	-0.122645	0.0566822	0.0182959	0.879563	0.968766	FALSE	None
UXS1	3	-0.140361	0.0443246	3	-0.018931	0.000922658	0.10689	0.24697	0.618917	FALSE	None
VAC14	3	-0.336484	0.063367	3	-0.176932	0.0165947	0.0874099	0.46484	0.794396	FALSE	None
VAMP2	3	-0.366586	0.181835	3	-0.258683	0.0338117	0.0302873	0.820466	0.94829	FALSE	None
VDAC1	3	-0.573748	0.0126619	3	-0.194296	0.0250719	0.273044	0.0219531	0.233396	TRUE	None
VHL	3	-1.49712	0.0872579	3	-1.44343	0.113827	-0.217036	0.0377858	0.298999	TRUE	None
VIM	3	-0.0515842	0.00664642	3	-0.0604916	0.0363933	-0.00915593	0.923135	0.982678	FALSE	None
VKORC1L1	3	-0.221386	0.121077	3	-0.0967092	0.00680568	0.0889307	0.422046	0.757135	FALSE	None
VMP1	3	-1.81751	0.254726	3	-1.76227	0.184348	-0.254193	0.136567	0.495875	FALSE	None
VPS16	3	-0.598011	0.141312	3	-1.11682	0.1649	-0.701052	9.55287e-05	0.00906363	TRUE	Negative
VPS18	3	-0.778355	0.0463957	3	-1.2224	0.0377936	-0.648441	0.000244625	0.015442	TRUE	None
VPS45	3	-0.451507	0.0132689	3	-0.535666	0.000896205	-0.220269	0.0324275	0.265696	TRUE	None
WDHD1	3	-2.20162	0.223175	3	-2.31229	0.428112	-0.472044	0.00919082	0.157334	TRUE	None
WDR1	3	-1.30732	0.06517	3	-1.03522	0.0437073	0.0555399	0.614871	0.878049	FALSE	None
WDR24	3	-1.26893	0.0691777	3	-1.17631	0.172632	-0.135672	0.38084	0.727124	FALSE	None
WDR33	3	-3.77019	0.544938	3	-3.57504	1.01961	-0.599288	0.15822	0.518839	FALSE	None
WDR73	3	-1.75355	0.19742	3	-1.12321	0.000534617	0.373501	0.0234121	0.234121	TRUE	None
WDR83OS	3	-0.016133	0.0140868	3	-0.0153351	0.0122028	0.0148898	0.875634	0.966547	FALSE	None
WEE1	3	-2.71686	1.0404	3	-2.83251	2.96442	-0.694875	0.0228076	0.234121	TRUE	None
WIPF1	3	-0.450716	0.271584	3	-0.451805	0.127774	-0.1046	0.363821	0.713513	FALSE	None
WNK3	3	-0.175377	0.00595929	3	-0.00931045	0.0071788	0.151662	0.129194	0.489807	FALSE	None
WRN	3	0.0793438	0.0411222	3	0.0841654	0.0512173	0.0398424	0.644059	0.884955	FALSE	None
WSB2	3	-0.403476	0.0197251	3	-0.299735	0.00342764	0.0015302	0.990086	0.996887	FALSE	None
WT1	3	-0.0570715	0.0163287	3	-0.0509982	0.0974966	-0.00401434	0.974505	0.996887	FALSE	None
WWP1	3	-0.217287	0.135399	3	-0.0953861	0.0684323	0.0885102	0.367015	0.715609	FALSE	None
XBP1	3	-0.40911	0.0534987	3	-0.317733	0.0185468	-0.00791032	0.934879	0.982996	FALSE	None
XPA	3	-0.407222	0.069525	3	-0.124126	0.0342689	0.213935	0.110752	0.46633	FALSE	None
XPC	3	-0.145141	0.0671041	3	-0.113445	0.00145502	-0.00051771	0.995483	0.996887	FALSE	None
XPNPEP3	3	-0.176015	0.0166609	3	-0.123412	0.0161747	0.0176762	0.850103	0.958263	FALSE	None
XPOT	3	-0.718255	0.0250569	3	-0.720275	0.140645	-0.162098	0.160627	0.519978	FALSE	None
XRCC1	3	-0.244998	0.0495777	3	-0.0643257	0.019431	0.136948	0.176908	0.546414	FALSE	None
XRCC2	3	-0.518625	0.315336	3	-0.320313	0.141239	0.110956	0.325768	0.680708	FALSE	None
XRCC3	3	-1.35115	1.53129	3	-1.19047	0.644032	-0.0362075	0.847631	0.958263	FALSE	None
XRCC4	3	-0.133876	0.043666	3	0.0820365	0.0495971	0.218355	0.0381889	0.298999	TRUE	None
XRCC5	3	-2.76084	0.860741	3	-2.22264	0.181619	0.0891557	0.645126	0.884955	FALSE	None
XRCC6	3	-1.7921	1.32448	3	-1.28845	0.37982	0.24758	0.15746	0.518029	FALSE	None
ATP23	3	-0.226395	0.0178756	3	-0.223409	0.0814526	-0.0572289	0.603583	0.871539	FALSE	None
YBEY	3	-0.210422	0.00373625	3	-0.0221636	0.0288822	0.159871	0.0795999	0.39871	FALSE	None
YPEL5	3	-0.945681	0.0233746	3	-0.925175	0.040813	-0.167541	0.226437	0.59713	FALSE	None
YWHAQ	3	0.0164846	0.0158275	3	0.0912318	0.027391	0.10244	0.31029	0.669644	FALSE	None
ZBTB11	3	-1.56871	0.587573	3	-1.1104	0.205379	0.202588	0.180845	0.546474	FALSE	None
ZBTB2	3	-0.992145	0.164031	3	-0.926813	0.224402	-0.124944	0.324487	0.679942	FALSE	None
ZBTB45	3	-0.355537	0.283559	3	-0.159415	0.0865769	0.154193	0.102033	0.442994	FALSE	None
ZBTB7A	3	0.767593	0.0535446	3	0.402804	0.0118614	-0.228052	0.015215	0.194062	TRUE	None
ZDHHC5	3	-0.410199	0.0157745	3	-0.326176	0.0309396	-0.0263802	0.808071	0.94829	FALSE	None
ZFP36L2	3	-0.327061	0.213342	3	-0.403294	0.0456109	-0.164738	0.128326	0.489807	FALSE	None
RBSN	3	-1.40073	0.5342	3	-1.28513	0.397422	-0.124912	0.299658	0.664546	FALSE	None
ZMYND8	3	-0.551078	0.112058	3	-0.60098	0.32277	-0.167717	0.224649	0.59713	FALSE	None
ZNF217	3	-0.0585388	0.0432868	3	0.00404858	0.0259971	0.0508168	0.575219	0.848133	FALSE	None
ZNF281	3	-0.114379	0.0535638	3	0.124608	0.00876817	0.257154	0.0513343	0.336419	FALSE	None
ZNF512	3	-0.123265	0.00629533	3	0.101208	0.00358149	0.245198	0.0260218	0.247944	TRUE	None
ZNF689	3	-0.295369	0.00163142	3	-0.0684097	0.0389991	0.188076	0.0914731	0.430658	FALSE	None
ZRSR2	3	-0.178533	0.0747486	3	-0.154823	0.009966	-0.0120153	0.891482	0.971302	FALSE	None
ZSCAN2	3	0.0152155	0.00829494	3	-0.194382	0.0577563	-0.227617	0.0568623	0.361756	FALSE	None
ZSWIM6	3	0.247361	0.0616338	3	0.250942	0.0702588	0.0752223	0.4132	0.751992	FALSE	None

## Sheet: BTZ_T12
gene	n_T12_DMSO	mean_T12_DMSO	variance_T12_DMSO	n_T12_80	mean_T12_80	variance_T12_80	differential_T12_80_vs_T12_DMSO	pval_T12_80_vs_T12_DMSO	fdr_T12_80_vs_T12_DMSO	significant_T12_80_vs_T12_DMSO	effect_type_T12_80
A1BG	3	-0.295465	0.0203963	3	-0.156906	0.00130439	0.160977	0.116983	0.395159	FALSE	None
ABCC1	3	0.195425	0.0429233	3	0.108319	0.0610578	-0.0733525	0.416025	0.7146	FALSE	None
ACACA	3	-1.04845	0.0199059	3	-0.594142	0.034142	0.494142	0.000185433	0.00785346	TRUE	None
ACO2	3	-0.331959	0.0353604	3	-0.306899	0.0435048	0.071271	0.599936	0.833717	FALSE	None
ACTB	3	1.17116	0.0406902	3	0.379612	0.0627994	-0.646235	6.9132e-05	0.00465489	TRUE	None
ACTG1	3	0.740733	0.022709	3	0.456409	0.0316502	-0.173666	0.0619477	0.272584	TRUE	None
ACTR1A	3	-1.16232	0.122659	3	-2.02113	1.14157	-0.836153	0.0104236	0.128001	TRUE	Negative
ACTR1B	3	-1.0483	1.38697	3	-1.02244	0.929125	0.0430085	0.622779	0.84503	FALSE	None
AGK	3	0.0139554	0.174794	3	0.0525112	0.151987	0.0751779	0.323865	0.651421	FALSE	None
AHCYL1	3	-0.334722	0.0108107	3	-0.304282	0.105473	0.0537853	0.656102	0.863528	FALSE	None
AKIRIN1	3	-0.717547	0.0571761	3	-0.992024	0.0868296	-0.242285	0.0503692	0.24478	TRUE	None
AKT1	3	-0.244152	0.0102089	3	-0.094625	0.0352601	0.168344	0.0708489	0.296919	TRUE	None
AKT3	3	-0.277253	0.00426374	3	-0.156586	0.000444723	0.145037	0.125549	0.409047	FALSE	None
ALDH18A1	3	-0.114235	0.00169098	3	-0.151888	0.00213944	-0.0275637	0.703863	0.887086	FALSE	None
ALG12	3	-0.526539	0.0644523	3	-0.834059	0.0119515	-0.266018	0.0299453	0.198729	TRUE	None
ALG6	3	-1.2803	0.0749288	3	-0.994136	0.0159059	0.293004	0.0691124	0.292405	TRUE	None
ALG8	3	-1.33589	0.0195177	3	-0.993703	0.0220899	0.354551	0.00290435	0.0543221	TRUE	None
ALG9	3	-0.699154	0.0019129	3	-0.753574	0.0164667	-0.00751713	0.936939	0.962674	FALSE	None
ALK	3	-1.33176	4.27485	3	-1.09239	3.6246	0.229377	0.146848	0.439595	FALSE	None
ALKBH1	3	-0.186547	0.0025286	3	-0.389456	0.00408477	-0.1588	0.131854	0.418503	FALSE	None
AMOT	3	-0.163289	0.0511604	3	-0.105456	0.020125	0.0739376	0.602311	0.833717	FALSE	None
ANAPC5	3	-2.17957	3.20071	3	-2.36132	6.05377	-0.0418365	0.846479	0.937144	FALSE	None
ANKDD1A	3	-0.240025	0.00406787	3	-0.213778	0.0219491	0.0391454	0.670683	0.870681	FALSE	None
ANKRD11	3	-0.984229	0.703724	3	-0.516648	0.158245	0.500904	0.0116782	0.128001	TRUE	None
ANP32B	3	0.0483916	0.108892	3	-0.177294	0.153135	-0.193831	0.0373863	0.217013	TRUE	None
AP2S1	3	-0.669651	0.0324723	3	-1.04635	0.244352	-0.335629	0.0105649	0.128001	TRUE	None
APC	3	0.59042	0.065176	3	0.643581	0.0612389	0.158968	0.0677681	0.288801	TRUE	None
APC2	3	-0.0661768	0.0373362	3	-0.0905643	0.00690601	-0.0255553	0.803602	0.930275	FALSE	None
APEX1	3	-0.241162	0.0276904	3	-0.287637	0.0120015	-0.013702	0.906389	0.948656	FALSE	None
ARF1	3	-1.59789	0.104815	3	-1.48385	0.016151	0.10288	0.306741	0.630046	FALSE	None
ARF4	3	-4.30157	0.0411778	3	-4.12603	1.02779	0.308661	0.421661	0.716965	FALSE	None
ARGLU1	3	-1.06729	0.328535	3	-1.12819	0.291938	-0.0378638	0.793445	0.930275	FALSE	None
ARHGAP5	3	-0.966362	0.335817	3	-0.751894	0.457385	0.240455	0.0309331	0.198729	TRUE	None
ARID1A	3	-0.673099	0.18311	3	-0.445855	0.00651333	0.27071	0.048122	0.239214	TRUE	None
ARID1B	3	-0.546016	0.00909966	3	-0.560018	0.159395	0.0330405	0.769678	0.92106	FALSE	None
ARID2	3	-0.900968	0.326638	3	-0.646161	0.15576	0.283458	0.0360013	0.21579	TRUE	None
ARID3B	3	-0.300033	0.133209	3	-0.5285	0.268185	-0.198157	0.0712056	0.29718	TRUE	None
ASNS	3	-0.102056	0.0487273	3	-0.0689466	0.0137428	0.0493858	0.589462	0.83129	FALSE	None
ATAD3A	3	-0.311255	0.063845	3	-0.34275	0.00622527	0.0140792	0.895246	0.948656	FALSE	None
ATAD5	3	-1.07315	0.0694025	3	-0.994442	0.111207	0.105174	0.483044	0.762287	FALSE	None
ATG9A	3	0.266205	0.0925721	3	0.205108	0.102823	-0.033084	0.682701	0.8749	FALSE	None
ATM	3	-0.703293	0.0158146	3	-0.524819	0.0780267	0.225297	0.104423	0.376107	FALSE	None
ATP2B1	3	-0.351889	0.00394428	3	-0.272869	0.00420318	0.115353	0.250757	0.566587	FALSE	None
ATP2C1	3	-0.24057	0.0144454	3	-0.403898	0.0829125	-0.142672	0.296832	0.619421	FALSE	None
ATP9A	3	-0.138982	0.0715238	3	-0.203446	0.0146683	-0.0413232	0.648368	0.859386	FALSE	None
ATP9B	3	-0.0269859	0.00455102	3	-0.0317656	0.00935496	-0.00930157	0.914665	0.950424	FALSE	None
ATR	3	-2.21029	1.2213	3	-2.17994	0.390367	0.0152479	0.936832	0.962674	FALSE	None
ATRIP	3	-1.40323	0.680189	3	-1.00323	0.291763	0.404066	0.0319695	0.203077	TRUE	None
ATRX	3	-1.6487	0.0938302	3	-1.71896	0.205069	-0.0581932	0.76189	0.918268	FALSE	None
AUP1	3	-1.44408	1.37755	3	-1.49371	1.17598	-0.0702884	0.590133	0.83129	FALSE	None
B3GNT2	3	-0.616254	0.0154723	3	-0.57317	0.0395252	0.0839619	0.353957	0.669469	FALSE	None
BABAM1	3	0.387117	0.0251004	3	0.216684	0.00429746	-0.153013	0.196602	0.510457	FALSE	None
BAK1	3	-0.834735	0.0903474	3	-0.982555	0.0780091	-0.10469	0.210531	0.529113	FALSE	None
BAP1	3	-2.58632	0.777808	3	-2.06714	0.234664	0.492658	0.0412359	0.231586	TRUE	None
BARD1	3	-2.02735	0.122863	3	-2.02837	0.0880199	-0.0270913	0.806176	0.930275	FALSE	None
BAX	3	-0.026133	0.00765056	3	-0.0616621	0.0275908	-0.0311968	0.797406	0.930275	FALSE	None
BCL2	3	-0.12072	0.0146505	3	0.120001	0.0175463	0.247625	0.0416052	0.231586	TRUE	None
BCL2L2	3	-0.228503	0.0274198	3	-0.339657	0.0279166	-0.081681	0.425218	0.719431	FALSE	None
BIRC6	3	-1.9544	0.0720363	3	-1.62075	0.0364187	0.314988	0.150649	0.446205	FALSE	None
BLM	3	-0.27873	0.0902547	3	-0.539545	0.122936	-0.225963	0.0917311	0.346998	FALSE	None
BMI1	3	0.171023	0.0103116	3	0.10239	0.00625396	-0.06222	0.540211	0.805901	FALSE	None
BMPR1A	3	0.0277017	0.0146656	3	-0.136197	0.266281	-0.151331	0.348037	0.665909	FALSE	None
BOLA3	3	-0.133865	0.0376667	3	-0.0651476	0.0616492	0.0728767	0.484598	0.762287	FALSE	None
BPTF	3	-1.22882	0.0107767	3	-1.17463	0.0502087	0.0571087	0.580395	0.824678	FALSE	None
BRAF	3	-0.409894	0.0761814	3	-0.492183	0.0870096	-0.0264707	0.826843	0.932878	FALSE	None
BRCA1	3	-1.74673	0.253918	3	-1.48612	0.0338086	0.242021	0.156355	0.460238	FALSE	None
BRCA2	3	-0.993493	0.106257	3	-0.73303	0.0255108	0.298328	0.0126188	0.13276	TRUE	None
BRD1	3	0.594909	0.00062362	3	0.462041	0.00461144	-0.0492788	0.711451	0.892629	FALSE	None
BRD4	3	-0.991618	0.0341193	3	-1.15229	0.0375322	-0.132834	0.290766	0.610547	FALSE	None
BRD7	3	-0.759677	0.0306218	3	-0.348634	0.0226138	0.455958	0.000220718	0.00817024	TRUE	None
BRINP3	3	0.0868257	0.0401727	3	-0.0338175	0.0462698	-0.111104	0.276503	0.593929	FALSE	None
BRIP1	3	-0.836485	0.193089	3	-0.423561	0.0516745	0.453236	0.000947603	0.0251863	TRUE	None
BRMS1	3	0.0909246	0.0361693	3	-0.173537	0.0395007	-0.251311	0.0191437	0.158485	TRUE	None
BRPF1	3	-0.505378	0.0335774	3	-0.62718	0.205198	-0.0840137	0.477682	0.759778	FALSE	None
EMSY	3	-0.543523	0.15134	3	-0.581772	0.0614714	-0.000572077	0.996155	0.997142	FALSE	None
MTRFR	3	-0.183701	0.055361	3	-0.250782	0.074583	-0.0493245	0.665332	0.86596	FALSE	None
C19orf53	3	-1.07893	0.0500176	3	-0.834679	0.267112	0.271261	0.045223	0.23905	TRUE	None
C1orf115	3	0.0250786	0.0619866	3	-0.043811	0.0996634	-0.0369595	0.752974	0.912069	FALSE	None
C22orf39	3	-0.223774	0.017702	3	-0.38457	0.0373512	-0.114649	0.185014	0.501819	FALSE	None
C6orf136	3	-0.203915	0.0128677	3	-0.219919	0.00150775	0.0177615	0.868703	0.945289	FALSE	None
C7orf26	3	-1.67431	0.0341345	3	-0.986951	0.0187623	0.704506	0.000229064	0.00817024	TRUE	Positive
FMC1-LUC7L2	3	-0.279554	0.0670711	3	-0.4575	0.162274	-0.132221	0.36517	0.678838	FALSE	None
PAXX	3	-0.0312583	0.0415962	3	-0.196624	0.0382377	-0.156003	0.133838	0.418503	FALSE	None
CAB39	3	0.931095	0.0459085	3	0.637616	0.0558104	-0.140479	0.124918	0.408307	FALSE	None
CABIN1	3	-0.561359	0.0255558	3	-1.34078	0.180309	-0.745613	0.000114493	0.00647579	TRUE	Negative
CAP1	3	-0.193731	0.0256447	3	-0.403037	0.104849	-0.184878	0.0541133	0.249564	TRUE	None
CBS	3	-0.101327	0.0109578	3	-0.087788	0.005852	0.0229847	0.822356	0.932522	FALSE	None
CCAR2	3	-0.815868	0.538409	3	-0.632833	0.350917	0.212055	0.0595666	0.265416	TRUE	None
SGF29	3	-0.839045	0.0471719	3	-0.695151	0.0449632	0.190751	0.0504102	0.24478	TRUE	None
CCDC51	3	-0.106377	0.0622798	3	-0.257409	0.014474	-0.115431	0.348293	0.665909	FALSE	None
CCNA2	3	-3.51322	1.34053	3	-3.36186	1.48263	0.299666	0.115304	0.390797	FALSE	None
CCNC	3	0.537358	0.00948342	3	-0.378989	0.0201664	-0.918897	1.12839e-07	0.000113967	TRUE	Negative
CCND1	3	-3.51186	2.31605	3	-3.37161	2.20359	0.319541	0.278592	0.596139	FALSE	None
CCND3	3	-0.367428	0.0257618	3	-0.435276	0.001602	-0.0178564	0.865285	0.944798	FALSE	None
CCNE1	3	0.0946518	0.0835344	3	-0.181105	0.037777	-0.248368	0.0142222	0.135514	TRUE	None
CCNO	3	-0.183837	0.0979814	3	-0.437329	0.0432475	-0.229887	0.0352975	0.214762	TRUE	None
CCS	3	-0.25275	0.0225644	3	-0.175193	0.0239896	0.124774	0.187022	0.501819	FALSE	None
CD44	3	-0.62478	0.159645	3	-0.617423	0.118886	0.0397031	0.764845	0.918827	FALSE	None
CD46	3	-0.0306614	0.000894747	3	0.00104628	0.00461868	0.0363866	0.632827	0.849056	FALSE	None
CD55	3	-0.161452	0.00453809	3	-0.0842966	0.0624864	0.0873332	0.367009	0.678899	FALSE	None
CD59	3	-0.215157	0.014571	3	-0.281032	0.0170288	-0.0408516	0.680466	0.8749	FALSE	None
CDC25A	3	-0.204571	0.0466394	3	-0.535336	0.151818	-0.292017	0.0554049	0.254359	TRUE	None
CDC40	3	-2.77264	0.381726	3	-3.40219	0.138398	-0.659302	0.0754668	0.307413	FALSE	None
CDC42	3	-2.54391	5.00653	3	-2.14368	2.69196	0.407942	0.137661	0.426496	FALSE	None
CDC45	3	-3.37182	2.35563	3	-4.02783	3.01903	-0.439802	0.180391	0.498823	FALSE	None
CDK11A	3	-2.019	0.0702615	3	-2.7211	0.964519	-0.713015	0.0296157	0.198729	TRUE	Negative
CDK13	3	0.821486	0.0342616	3	0.390778	0.00627444	-0.328941	0.0275491	0.196331	TRUE	None
CDK4	3	-2.9351	0.148529	3	-3.66609	0.0158832	-0.738869	0.00613968	0.0910284	TRUE	Negative
CDK5	3	-0.367752	0.0465671	3	-0.0584892	0.0573968	0.338678	0.000703659	0.0203056	TRUE	None
CDK6	3	-1.00951	0.0792948	3	-0.937364	0.0686531	0.0965252	0.327795	0.653004	FALSE	None
CDKN1B	3	0.582424	0.0144043	3	0.549866	0.0224521	0.0624552	0.559153	0.812026	FALSE	None
CDKN2A	3	0.234096	0.0232657	3	0.172945	0.0618578	-0.0504816	0.689667	0.880612	FALSE	None
CDKN2B	3	0.187291	0.0445365	3	0.00897218	0.00421085	-0.172026	0.130962	0.418503	FALSE	None
CDS2	3	-2.91443	1.75004	3	-2.50523	1.90182	0.389329	0.0662962	0.28615	TRUE	None
CDX2	3	-0.0577657	0.0629794	3	-0.0557236	0.136284	0.0223618	0.851396	0.937144	FALSE	None
CELF1	3	-0.343695	0.0509844	3	-0.494699	0.0680037	-0.115992	0.239612	0.556957	FALSE	None
CELSR2	3	-0.287949	0.139651	3	-0.297461	0.0153653	0.0203556	0.877556	0.945477	FALSE	None
CHD1L	3	0.0467022	0.0535166	3	-0.017631	0.023937	-0.0652258	0.481206	0.762287	FALSE	None
CHD2	3	-0.340541	0.0577655	3	-0.122501	0.0763864	0.249808	0.0131806	0.134216	TRUE	None
CHD4	3	-1.47895	0.102459	3	-1.38861	0.382548	0.107071	0.468343	0.749645	FALSE	None
CHD8	3	0.300987	0.0574135	3	-0.375421	0.0217367	-0.656029	3.23366e-05	0.00277219	TRUE	None
CHEK1	3	-3.07246	6.14096	3	-3.0755	6.57435	0.0973896	0.799927	0.930275	FALSE	None
CHEK2	3	-0.199989	0.020177	3	-0.615924	0.244029	-0.368373	0.00931292	0.12059	TRUE	None
CHMP5	3	-2.38744	0.0862288	3	-2.17646	0.0681924	0.162327	0.233037	0.553807	FALSE	None
CHTF18	3	-0.632196	0.262015	3	-0.52259	0.145348	0.144135	0.269429	0.584522	FALSE	None
CIT	3	-0.530899	0.0272939	3	-0.447221	0.00939476	0.136241	0.239311	0.556957	FALSE	None
CLPP	3	-0.24377	0.0900752	3	-0.232512	0.12891	0.0334511	0.830353	0.932878	FALSE	None
CLPX	3	-0.102599	0.0354114	3	-0.344641	0.00531153	-0.221666	0.0467545	0.23905	TRUE	None
CLSPN	3	-0.681178	0.0868604	3	-0.673671	0.0835066	0.0484114	0.644856	0.857079	FALSE	None
COIL	3	-0.616491	0.0306071	3	-0.415337	0.018775	0.231391	0.035791	0.21579	TRUE	None
COMMD8	3	-0.998213	0.0830414	3	-0.834671	0.0353254	0.190199	0.210459	0.529113	FALSE	None
COQ2	3	-0.294206	0.114998	3	-0.202338	0.0369397	0.114334	0.376824	0.692595	FALSE	None
COQ7	3	-0.342796	0.00229933	3	-0.282318	0.00317883	0.109704	0.247917	0.565017	FALSE	None
COX5A	3	-0.708493	0.272991	3	-1.09379	0.35029	-0.360004	0.052111	0.245944	TRUE	None
CPD	3	-0.234986	0.00760111	3	-0.405272	0.246581	-0.141894	0.312299	0.63689	FALSE	None
CPOX	3	-0.480762	0.074478	3	-0.426407	0.0159996	0.123617	0.430906	0.72175	FALSE	None
CRABP2	3	0.0397062	0.0153273	3	0.0431054	0.00361159	0.00346702	0.964769	0.976369	FALSE	None
CRAMP1	3	-0.015044	0.000321878	3	-0.0728878	0.00188986	-0.0458036	0.548502	0.806386	FALSE	None
CREBBP	3	-0.247134	0.17981	3	0.28114	0.17772	0.553675	0.000133522	0.00674284	TRUE	None
CS	3	-0.537151	0.0167113	3	-0.524769	0.0214606	0.0687285	0.63284	0.849056	FALSE	None
CSK	3	-0.880466	0.127073	3	-1.02392	0.0889908	-0.107457	0.442817	0.728596	FALSE	None
CSNK2A2	3	-0.445981	0.0347424	3	-0.571884	0.0519743	-0.0688593	0.499404	0.775308	FALSE	None
CTDNEP1	3	-1.66385	0.0921525	3	-1.97267	0.406452	-0.316556	0.0211604	0.166052	TRUE	None
CTNNA1	3	-0.115767	0.0504667	3	-0.0528145	0.0271062	0.0725918	0.482235	0.762287	FALSE	None
CTNNB1	3	-0.45367	0.15732	3	-0.538483	0.26837	-0.049722	0.607817	0.833833	FALSE	None
CUL4A	3	-0.0165439	0.0151699	3	-0.0591192	0.00179036	-0.03645	0.656623	0.863528	FALSE	None
CUL5	3	1.47218	0.00731975	3	1.134	0.00411652	-0.0403966	0.666556	0.866437	FALSE	None
TASL	3	-0.169728	0.0137258	3	-0.205749	0.133883	-0.0135417	0.922356	0.954986	FALSE	None
CFAP47	3	-0.0654431	0.0141253	3	0.0103097	0.0357312	0.0768371	0.400684	0.702205	FALSE	None
BCLAF3	3	0.0340278	0.0276292	3	0.0566705	0.0188423	0.0174254	0.884606	0.946199	FALSE	None
LINC01560	3	-0.0427028	0.00867226	3	0.0160147	0.00356713	0.0527185	0.588191	0.830871	FALSE	None
H2AP	3	-0.0424381	0.0238485	3	-0.215816	0.0396957	-0.14523	0.199251	0.516009	FALSE	None
LINC01545	3	-0.195682	0.00400065	3	-0.166084	0.00693543	0.0549311	0.534939	0.802417	FALSE	None
DIPK2B	3	-0.290452	0.0240116	3	-0.125466	0.0450829	0.185442	0.0948725	0.352479	FALSE	None
CXXC1	3	0.453854	0.0624415	3	-0.20627	0.0663838	-0.63431	1.97464e-06	0.000505304	TRUE	None
CYB5B	3	-0.688535	0.258695	3	-0.606315	0.128366	0.114898	0.350097	0.665909	FALSE	None
CYB5R4	3	-0.766496	0.0951726	3	-0.195899	0.0553706	0.600632	3.29369e-05	0.00277219	TRUE	None
DAPK3	3	0.249778	0.0238161	3	0.313573	0.0430675	0.0850611	0.329987	0.654762	FALSE	None
DAXX	3	-0.445246	0.145991	3	-0.570153	0.00175683	-0.0933514	0.522038	0.794005	FALSE	None
DAZAP1	3	-0.131302	0.448977	3	-0.624464	0.839444	-0.484696	0.000499991	0.0161929	TRUE	None
DBF4	3	-1.2274	0.225304	3	-1.10769	0.190682	0.130089	0.349887	0.665909	FALSE	None
DCLRE1A	3	-0.0278668	0.00310143	3	-0.0402779	0.031479	-0.00794213	0.923545	0.954986	FALSE	None
DCLRE1B	3	-0.883932	0.0143121	3	-0.916704	0.0137945	-0.00590398	0.946611	0.968268	FALSE	None
DCLRE1C	3	-0.400552	0.0145121	3	-0.290056	0.0195499	0.145622	0.185302	0.501819	FALSE	None
DCTN1	3	-1.23751	0.420226	3	-1.36032	0.590904	-0.113433	0.379006	0.692595	FALSE	None
DCTN3	3	-2.36623	0.434949	3	-2.71603	1.87839	-0.369308	0.100695	0.364525	FALSE	None
DDB1	3	-2.2555	0.992707	3	-2.48085	1.38036	-0.252144	0.349327	0.665909	FALSE	None
DDB2	3	-0.241691	0.00938864	3	-0.283725	0.0161377	-0.0115533	0.886461	0.946199	FALSE	None
DDI2	3	-0.650649	0.00780661	3	-2.79244	0.597809	-2.12258	6.30832e-07	0.00031857	TRUE	Negative
DDX5	3	-0.361479	0.00296881	3	0.0338063	0.00861002	0.411085	0.00133206	0.0336345	TRUE	None
DET1	3	-0.361155	0.0393701	3	-0.503562	0.0216901	-0.109296	0.236002	0.554845	FALSE	None
DHX29	3	-0.077904	0.0379924	3	0.48182	0.0339786	0.579466	1.15032e-05	0.00145227	TRUE	None
DHX35	3	-1.23938	0.100251	3	-0.957031	0.0703037	0.29925	0.00457195	0.0748925	TRUE	None
DIAPH1	3	-0.351912	0.0333076	3	-0.29427	0.00930361	0.0909559	0.390648	0.697787	FALSE	None
DIS3L	3	-0.501113	0.0241163	3	-0.505314	0.117092	0.0265875	0.823521	0.932522	FALSE	None
DNA2	3	-2.27239	0.652116	3	-2.38478	0.325752	-0.126129	0.443711	0.728696	FALSE	None
DNAJB5	3	-0.24908	0.0244377	3	-0.197364	0.0194534	0.0859398	0.378114	0.692595	FALSE	None
DNMT3A	3	-0.142081	0.00146975	3	-0.206342	0.0169836	-0.0283743	0.743095	0.906972	FALSE	None
DOCK2	3	0.0430955	0.000572437	3	-0.0264232	0.0462373	-0.053387	0.56285	0.813274	FALSE	None
DOT1L	3	0.261608	0.0178843	3	-0.312292	0.0625968	-0.566051	0.000234591	0.00817024	TRUE	None
DPF2	3	-1.03159	0.164493	3	-0.944029	0.103287	0.111631	0.20541	0.525225	FALSE	None
DPM2	3	-0.843399	0.336466	3	-0.846128	0.301117	0.0264296	0.812714	0.932522	FALSE	None
DVL3	3	-0.170183	0.0042391	3	-0.401378	0.03003	-0.190824	0.0532084	0.249564	TRUE	None
DYRK1A	3	1.23129	0.48747	3	1.23264	0.493691	0.280609	0.0586018	0.265416	TRUE	None
E2F3	3	-0.919999	0.185178	3	-1.15543	0.00150816	-0.21681	0.0949251	0.352479	FALSE	None
E2F7	3	-0.0276838	0.0265668	3	-1.41696	0.0544696	-1.34558	9.13674e-06	0.0013183	TRUE	Negative
ECSIT	3	-0.0788188	0.00778336	3	-0.0414393	0.0941091	0.0528536	0.603807	0.833833	FALSE	None
EDC3	3	-0.753591	0.0528343	3	-1.05595	0.119349	-0.278977	0.0287096	0.198729	TRUE	None
EDF1	3	-0.279648	0.0958074	3	-0.362304	0.142304	-0.0548423	0.534485	0.802417	FALSE	None
EED	3	-0.0305586	0.0858346	3	-0.371192	0.0371225	-0.291162	0.0151628	0.139103	TRUE	None
EEFSEC	3	-1.99326	0.892486	3	-1.49219	0.582038	0.478093	0.00260663	0.0510679	TRUE	None
EGFR	3	-0.0791216	0.0140337	3	-0.0144697	0.00263922	0.0689516	0.484833	0.762287	FALSE	None
EHMT2	3	-0.619126	0.0379409	3	-0.522911	0.000505104	0.144347	0.19286	0.507261	FALSE	None
EIF2AK4	3	0.227568	0.036481	3	0.0457084	0.110938	-0.157449	0.232848	0.553807	FALSE	None
EIF2S1	3	-4.0274	0.517167	3	-4.01999	0.330241	0.111615	0.806926	0.930275	FALSE	None
EIF3I	3	-3.85382	0.433409	3	-3.86132	0.42545	0.0132871	0.963281	0.976369	FALSE	None
EIF4A1	3	-3.54906	0.367404	3	-3.04633	0.0256912	0.459384	0.12722	0.410519	FALSE	None
EIF4B	3	-1.15325	0.717367	3	-1.35495	0.834039	-0.195063	0.357604	0.672588	FALSE	None
EIF4ENIF1	3	-1.71444	0.000501375	3	-1.70997	0.129633	-0.00310623	0.981185	0.988269	FALSE	None
EIF4G1	3	-1.55025	0.508479	3	-1.30856	0.182607	0.234961	0.03777	0.217987	TRUE	None
EIF4H	3	-0.846016	0.0769328	3	-0.633966	0.0311747	0.257024	0.0390453	0.224067	TRUE	None
ELAVL1	3	-0.918579	0.0661765	3	-0.845156	0.0439807	0.102025	0.323464	0.651421	FALSE	None
ELF2	3	-0.639735	0.0429768	3	-0.653219	0.00501959	0.028108	0.82616	0.932878	FALSE	None
ELMO1	3	-0.310951	0.0235391	3	-0.106381	0.0641549	0.219935	0.0114803	0.128001	TRUE	None
EME1	3	-0.433508	0.0231116	3	-0.181528	0.0342876	0.301793	0.00607022	0.0910284	TRUE	None
EP300	3	0.906202	0.0669701	3	1.00345	0.0628287	0.305869	0.00152395	0.0366473	TRUE	None
EPC2	3	-0.910777	0.167928	3	-0.708079	0.0119626	0.241334	0.113145	0.387781	FALSE	None
EPHA7	3	-0.0101017	0.0151948	3	-0.122017	0.0108073	-0.0997422	0.248335	0.565017	FALSE	None
ERBB2	3	-0.0960735	0.0391098	3	-0.354787	0.100018	-0.213462	0.141357	0.43133	FALSE	None
ERBB3	3	0.0208206	0.0277772	3	-0.223771	0.0486865	-0.221734	0.0718784	0.297713	TRUE	None
ERCC1	3	-0.698065	0.0805418	3	-0.405661	0.110461	0.322272	0.0145174	0.136212	TRUE	None
ERCC2	3	-2.7689	0.236992	3	-2.76104	0.0259053	-0.0335581	0.882103	0.946199	FALSE	None
ERCC4	3	-0.714849	0.301905	3	-0.432145	0.0643663	0.318915	0.0289715	0.198729	TRUE	None
ERCC6	3	-0.164703	0.0277802	3	-0.306592	0.13785	-0.106201	0.386334	0.697066	FALSE	None
ERCC8	3	-0.139269	0.0370709	3	-0.315301	0.100301	-0.151339	0.121252	0.405511	FALSE	None
ERG	3	-0.0507724	0.0179771	3	0.0280841	0.0131911	0.0971242	0.221126	0.542777	FALSE	None
ETFA	3	-0.134208	0.0243426	3	-0.205851	0.0242624	-0.0374546	0.656131	0.863528	FALSE	None
ETV1	3	-0.226768	0.0755608	3	-0.197004	0.112827	0.0633181	0.418882	0.714819	FALSE	None
EXO1	3	-0.134147	0.0347917	3	-0.14258	0.0859438	0.0168057	0.850724	0.937144	FALSE	None
EXT1	3	0.843818	0.00409807	3	0.430653	0.0039589	-0.297108	0.00262924	0.0510679	TRUE	None
EXT2	3	0.427728	0.0592231	3	0.206728	0.0280921	-0.189078	0.059653	0.265416	TRUE	None
EXTL3	3	0.658712	0.0291517	3	0.367401	0.0235084	-0.213228	0.0468623	0.23905	TRUE	None
EZH2	3	0.119996	0.0147807	3	-0.00824279	0.0478751	-0.124848	0.176113	0.494096	FALSE	None
F2R	3	-0.278998	0.0133991	3	-0.400811	0.0761137	-0.0946268	0.430007	0.72144	FALSE	None
FAM111A	3	-0.133245	0.078189	3	-0.200411	0.098459	-0.0319112	0.720761	0.896514	FALSE	None
FAM111B	3	-0.104302	0.0109131	3	-0.00842549	0.00415083	0.0980904	0.32442	0.651421	FALSE	None
FAM136A	3	-0.539274	0.138774	3	-0.467963	0.0912538	0.113457	0.263707	0.577753	FALSE	None
ABRAXAS1	3	-0.425679	0.00239272	3	-0.231777	0.000679838	0.204065	0.0367608	0.21579	TRUE	None
SHLD2	3	-0.716273	0.0407401	3	-0.568036	0.0353878	0.192578	0.0754836	0.307413	FALSE	None
TENT5C	3	-0.0907683	0.0115666	3	-0.0607766	0.018403	0.0391396	0.610063	0.833833	FALSE	None
SINHCAF	3	-1.091	0.663648	3	-1.24042	0.708061	-0.120572	0.284247	0.602097	FALSE	None
FAN1	3	-0.275783	0.00111901	3	-0.211685	0.0281223	0.0910607	0.336884	0.660684	FALSE	None
FANCA	3	-0.349526	0.00858095	3	-0.466626	0.0129911	-0.0755012	0.409784	0.709917	FALSE	None
FANCB	3	-0.314423	0.00388525	3	-0.328244	0.0107634	0.0227079	0.781341	0.926929	FALSE	None
FANCC	3	-0.512606	0.0205101	3	-0.694912	0.00409415	-0.126764	0.276971	0.593929	FALSE	None
FANCD2	3	-0.923677	0.0135143	3	-0.997435	0.0119722	-0.0477362	0.665067	0.86596	FALSE	None
FANCD2OS	3	0.0506007	0.0284783	3	0.0621266	0.0272291	0.00676887	0.932703	0.961255	FALSE	None
FANCE	3	-0.591284	0.000462139	3	-0.543806	0.0335026	0.0894744	0.348143	0.665909	FALSE	None
FANCF	3	-0.520345	0.0124943	3	-0.479214	0.058143	0.0847771	0.412031	0.711259	FALSE	None
FANCG	3	-0.701436	0.207435	3	-0.479132	0.16573	0.258972	0.0273033	0.196331	TRUE	None
FANCI	3	-0.887011	0.00814326	3	-0.619256	0.0549354	0.310295	0.087573	0.334245	FALSE	None
FANCL	3	-0.585826	0.00765216	3	-0.277862	0.0174814	0.343686	0.00283245	0.0539769	TRUE	None
FANCM	3	-0.423082	0.286766	3	-0.409084	0.103697	0.0513621	0.630818	0.849056	FALSE	None
FASN	3	-0.642008	0.104555	3	-0.563827	0.0337297	0.112312	0.31757	0.644067	FALSE	None
FASTKD1	3	-0.151704	0.0236681	3	-0.16196	0.02037	0.0227253	0.816866	0.932522	FALSE	None
FBRSL1	3	-0.486818	0.0580362	3	-0.60374	0.0769752	-0.0693248	0.433256	0.723288	FALSE	None
FBXW7	3	0.680486	0.0470215	3	0.553159	0.0459308	-0.0188435	0.800623	0.930275	FALSE	None
FDX1	3	-0.417366	0.0220634	3	-0.58399	0.0403159	-0.10829	0.273532	0.589057	FALSE	None
FDX2	3	-2.37022	0.726324	3	-2.23565	0.425247	0.112773	0.381244	0.695047	FALSE	None
FECH	3	-0.283091	0.048747	3	-0.321088	0.143871	-0.016697	0.887581	0.946199	FALSE	None
FEM1B	3	-0.182701	0.00713227	3	-0.427045	0.0395394	-0.200751	0.187313	0.501819	FALSE	None
FEN1	3	-2.41084	0.0829073	3	-1.57091	0.0296333	0.798477	0.000121822	0.00647579	TRUE	Positive
FGFR1	3	-0.300849	0.0131041	3	-0.349304	0.00187648	-0.0151812	0.89244	0.948656	FALSE	None
FGFR2	3	-0.0377375	0.0100486	3	-0.0539566	0.0239286	-0.0132681	0.890021	0.94723	FALSE	None
FGFR3	3	0.193615	0.0114234	3	0.147484	0.0320764	-0.0291704	0.757412	0.913997	FALSE	None
FGFR4	3	-0.14258	0.000209936	3	-0.340937	0.0701736	-0.145649	0.247237	0.565017	FALSE	None
FH	3	0.049522	0.00579128	3	-0.082463	0.0133689	-0.12411	0.226433	0.548435	FALSE	None
FIBP	3	-0.198957	0.0421144	3	-0.30682	0.0501739	-0.0685021	0.418983	0.714819	FALSE	None
FLCN	3	-0.316855	0.00922857	3	-1.04407	0.000407843	-0.690682	0.000196571	0.00794146	TRUE	None
FLNB	3	-0.30912	0.0622228	3	-0.199074	0.0405336	0.143726	0.248384	0.565017	FALSE	None
FOSL1	3	-1.37167	1.7077	3	-1.3773	1.49272	-0.0268669	0.884687	0.946199	FALSE	None
FOXA1	3	-0.297955	0.00277454	3	-0.339434	0.00857857	-0.025189	0.844645	0.937144	FALSE	None
FOXK1	3	-0.496249	0.0476436	3	-0.618205	0.0197557	-0.0700893	0.542352	0.805901	FALSE	None
FOXM1	3	-1.29979	0.519829	3	-1.46839	1.02111	-0.162883	0.185221	0.501819	FALSE	None
FPGS	3	-0.153835	0.0100952	3	-0.07036	0.0191748	0.102247	0.184905	0.501819	FALSE	None
MRM2	3	-0.239042	0.00240351	3	-0.569668	0.00285983	-0.259772	0.0306037	0.198729	TRUE	None
FURIN	3	-0.895573	0.0850623	3	-0.89862	0.0913092	0.0247167	0.837609	0.933907	FALSE	None
FZD1	3	-0.196131	0.0500529	3	-0.1173	0.0153503	0.0908286	0.280637	0.599246	FALSE	None
FZD10	3	-0.204111	0.0947229	3	-0.0768862	0.0582345	0.143546	0.157223	0.460277	FALSE	None
FZD2	3	-0.184378	0.0398387	3	-0.174279	0.033949	0.033237	0.730203	0.903805	FALSE	None
FZD3	3	0.0480964	0.0234788	3	-0.0360021	0.0109605	-0.0823737	0.373804	0.688946	FALSE	None
FZD4	3	-0.239418	0.0526215	3	-0.246764	0.125097	0.0138298	0.879013	0.945477	FALSE	None
FZD5	3	-0.106928	0.00237029	3	-0.0196191	0.0103011	0.0898101	0.25256	0.566856	FALSE	None
FZD6	3	-0.0193523	0.00499527	3	-0.0903797	0.00155555	-0.0547837	0.594786	0.833717	FALSE	None
FZD7	3	-0.0679405	0.011086	3	-0.110449	0.0669884	-0.0177049	0.870105	0.945289	FALSE	None
FZD8	3	-0.212497	0.0126479	3	-0.278179	0.00932009	-0.0426695	0.66499	0.86596	FALSE	None
FZD9	3	-0.206777	0.00770468	3	-0.185052	0.0328491	0.0386344	0.634563	0.849056	FALSE	None
G6PD	3	-0.859595	0.121253	3	-0.43369	0.00390779	0.451264	0.0198409	0.161907	TRUE	None
GANAB	3	-0.574437	0.110458	3	-0.579707	0.120965	0.0354658	0.765556	0.918827	FALSE	None
GATA3	3	-0.0854217	0.00792689	3	-0.0530621	1.4594e-05	0.048305	0.580541	0.824678	FALSE	None
GATAD1	3	-0.483503	0.122862	3	-0.599647	0.120904	-0.086147	0.440103	0.726314	FALSE	None
GCLC	3	-0.180707	0.0185198	3	-0.311094	0.0387913	-0.109228	0.385635	0.697066	FALSE	None
GCLM	3	-0.188148	0.00922468	3	-0.104393	0.0514303	0.103942	0.259565	0.573655	FALSE	None
GCN1	3	-0.761483	0.073766	3	-0.434966	0.0577872	0.373549	0.00535872	0.0845673	TRUE	None
GCSH	3	-0.448343	0.129577	3	-0.530788	0.18953	-0.0662369	0.417767	0.714819	FALSE	None
GEMIN6	3	-1.08805	0.955208	3	-1.022	0.571647	0.0676138	0.564518	0.814518	FALSE	None
GEN1	3	-0.1719	0.0824473	3	-0.262914	0.125053	-0.0668057	0.542784	0.805901	FALSE	None
GGNBP2	3	-1.55442	0.0539687	3	-1.07299	0.0104437	0.481596	0.00250348	0.0505703	TRUE	None
GHDC	3	-0.499201	0.0655422	3	-0.497292	0.0366372	0.045896	0.679497	0.8749	FALSE	None
GID8	3	-0.647452	0.102575	3	-1.06085	0.290977	-0.370648	0.0302905	0.198729	TRUE	None
GJC1	3	-0.205902	0.0528821	3	-0.159735	0.116533	0.0654607	0.47468	0.756194	FALSE	None
GLS	3	-0.102609	0.00376029	3	-0.112809	0.00339454	0.0116401	0.906275	0.948656	FALSE	None
GNA13	3	-0.546321	0.0603311	3	-0.253962	0.0579696	0.339221	0.00207144	0.0454815	TRUE	None
GNL2	3	-2.75822	1.34316	3	-2.48346	1.62416	0.30413	0.189117	0.503979	FALSE	None
GNPTG	3	0.015209	0.00416208	3	0.0195165	0.0416062	0.00575435	0.9505	0.968623	FALSE	None
GOT1	3	-0.150957	0.0149454	3	-0.168191	0.0883072	0.00574551	0.958795	0.974229	FALSE	None
GOT2	3	-0.594946	0.0313511	3	-0.785962	0.040306	-0.139986	0.22074	0.542777	FALSE	None
GPX4	3	-3.27361	0.567074	3	-2.60756	1.33796	0.641639	0.00854726	0.113589	TRUE	None
GRHL2	3	-0.156127	0.00130666	3	-0.114401	0.000603725	0.0598382	0.385432	0.697066	FALSE	None
GRK6	3	0.133841	0.107575	3	0.0360344	0.0939514	-0.0751	0.485298	0.762287	FALSE	None
GRSF1	3	-0.268294	0.00818561	3	-0.112034	0.0152438	0.163975	0.113416	0.387781	FALSE	None
GSK3B	3	0.156072	0.0197805	3	0.288737	0.0074807	0.139165	0.203258	0.521145	FALSE	None
GSPT1	3	-1.20375	0.498547	3	-1.36254	1.08727	-0.147519	0.46713	0.748891	FALSE	None
GSS	3	-0.237201	0.038324	3	-0.13733	0.00883966	0.10622	0.180762	0.498823	FALSE	None
GSTP1	3	-0.246	0.0979344	3	-0.194384	0.0473478	0.070455	0.393043	0.697787	FALSE	None
GTPBP3	3	-0.357143	0.0123661	3	-0.0906309	0.0524787	0.309639	0.0478354	0.239214	TRUE	None
HADHA	3	-0.419615	0.0238587	3	-0.405857	0.000296336	0.0640914	0.470426	0.751789	FALSE	None
HAX1	3	-0.0754547	0.042986	3	-0.177139	0.146409	-0.086999	0.347774	0.665909	FALSE	None
HCN1	3	-0.0471478	0.022689	3	-0.0200405	0.0535178	0.0313935	0.718804	0.896286	FALSE	None
HDAC2	3	-0.100847	0.00885213	3	-0.279672	0.00752048	-0.144448	0.110672	0.387083	FALSE	None
HDAC3	3	-2.65998	0.00205604	3	-2.1886	0.0143622	0.42402	0.0512244	0.245944	TRUE	None
HEATR3	3	-1.0272	0.111891	3	-0.973511	0.151474	0.0693807	0.628415	0.84883	FALSE	None
HECTD1	3	-1.32248	0.0193413	3	-1.58052	0.00775914	-0.261529	0.24357	0.561657	FALSE	None
HEXIM1	3	0.156647	0.0152204	3	0.00602431	0.0230842	-0.142337	0.132702	0.418503	FALSE	None
HIGD2A	3	-0.384813	0.0620992	3	-0.407197	0.0491471	0.020854	0.846542	0.937144	FALSE	None
H1-2	3	-0.225804	0.0865378	3	-0.386221	0.120234	-0.133812	0.245333	0.564433	FALSE	None
HK2	3	-0.63665	0.00526615	3	-0.422662	0.0488137	0.262469	0.0171276	0.146911	TRUE	None
HLTF	3	-0.0990881	0.0348378	3	0.121833	0.00332216	0.226534	0.0346905	0.214439	TRUE	None
ARHGAP45	3	-0.13448	0.0478593	3	-0.0564598	0.0283696	0.100141	0.239878	0.556957	FALSE	None
HNRNPD	3	-0.393406	0.00944692	3	-0.600884	0.000277093	-0.14771	0.142359	0.431779	FALSE	None
HNRNPK	3	-2.69395	2.40277	3	-3.32113	3.70125	-0.539233	0.0958766	0.353414	FALSE	None
UBE2A	6	-0.438364	0.0797317	6	-0.207387	0.0521385	0.266156	0.00239393	0.0503723	TRUE	None
UBE2E1	3	-0.0957748	0.033655	3	-0.287266	0.112973	-0.172249	0.163781	0.473573	FALSE	None
RIDA	3	-0.376487	0.00761445	3	-0.412811	0.0520083	-0.00791285	0.94937	0.968549	FALSE	None
HSD17B4	3	-0.224393	0.00442392	3	-0.200009	0.0190186	0.0527721	0.551978	0.809556	FALSE	None
HSD17B6	3	-0.021808	0.0227254	3	-0.180761	0.00877609	-0.134166	0.193531	0.507704	FALSE	None
HSF1	3	0.0213035	0.00484261	3	-0.490744	0.0290802	-0.456736	0.000144989	0.00697328	TRUE	None
HTRA2	3	-0.124813	0.00555402	3	-0.0768926	0.0972606	0.0630334	0.597687	0.833717	FALSE	None
HUS1	3	-1.16521	0.144064	3	-1.5599	0.484495	-0.39064	0.0170514	0.146911	TRUE	None
MRPL58	3	-0.290702	0.00144079	3	-0.326008	0.0421653	-0.00252085	0.978679	0.987479	FALSE	None
ID4	3	0.00985134	0.194055	3	0.017345	0.102504	0.0227015	0.833849	0.933907	FALSE	None
IDH1	3	-0.148582	0.000296793	3	-0.127904	0.0313101	0.0234513	0.797887	0.930275	FALSE	None
IDH2	3	-0.122956	0.0354743	3	-0.202828	0.0820263	-0.0618895	0.386492	0.697066	FALSE	None
IDH3A	3	-0.0596976	0.000858196	3	-0.0464286	0.0213033	0.0167871	0.858967	0.940951	FALSE	None
IER3IP1	3	-0.209849	0.0100165	3	-0.323657	0.0477823	-0.0708557	0.509344	0.782773	FALSE	None
IMPDH2	3	-0.846325	0.0462768	3	-0.482171	0.0221745	0.404319	0.00432074	0.0739651	TRUE	None
ING2	3	0.258446	0.023188	3	0.0256068	0.00583342	-0.235716	0.0203794	0.162072	TRUE	None
ING5	3	-0.115191	0.00653787	3	-0.268686	0.0438907	-0.138433	0.188588	0.503899	FALSE	None
INO80B	3	-0.929242	0.211161	3	-1.11733	0.567608	-0.149792	0.212062	0.530154	FALSE	None
INO80D	3	-0.23986	0.00994327	3	-0.12174	0.040103	0.156505	0.0565804	0.25858	TRUE	None
INPP4A	3	-0.536743	0.0908564	3	-0.376372	0.077226	0.195755	0.146659	0.439595	FALSE	None
INPPL1	3	-0.0390823	0.0149341	3	-0.373363	0.0875801	-0.304849	0.036962	0.21579	TRUE	None
INSR	3	0.0963318	0.00196012	3	-0.0556805	0.00721289	-0.148579	0.123389	0.408219	FALSE	None
IQCH	3	-0.176287	0.0481613	3	-0.388289	0.00722225	-0.175391	0.143361	0.432222	FALSE	None
IREB2	3	0.142909	0.0623673	3	0.0538942	0.0605535	-0.0717757	0.397818	0.699994	FALSE	None
IRF2BP1	3	0.0292427	0.0898547	3	-0.247787	0.0831542	-0.264185	0.0765597	0.308069	FALSE	None
IRS2	3	-0.153197	0.047734	3	-0.251331	0.110664	-0.0766763	0.358612	0.67323	FALSE	None
ITGA1	3	-0.255222	0.0709592	3	-0.306255	0.0399809	-0.0256099	0.847343	0.937144	FALSE	None
ITGA2	3	-0.0986162	0.00460432	3	-0.0889691	0.00525841	0.0256347	0.781924	0.926929	FALSE	None
ITGA3	3	-0.168329	0.0164346	3	-0.237676	0.0907679	-0.0382419	0.769309	0.92106	FALSE	None
ITGA4	3	0.193482	0.0142669	3	0.22949	0.019854	0.0356792	0.674004	0.872083	FALSE	None
ITGA5	3	-0.762155	0.0342875	3	-0.534044	0.102743	0.265386	0.0408671	0.231586	TRUE	None
ITGA6	3	-0.0104432	0.00278879	3	-0.0922501	0.0448446	-0.0757501	0.413375	0.711259	FALSE	None
ITGA7	3	-0.137592	0.027238	3	-0.405307	0.0041041	-0.22267	0.0536343	0.249564	TRUE	None
ITGA9	3	-0.0731528	0.0380958	3	0.0264248	0.0549426	0.108866	0.302045	0.624943	FALSE	None
ITGAE	3	0.0108156	0.0250297	3	-0.145976	0.0249373	-0.155863	0.0719229	0.297713	TRUE	None
ITGAV	3	-2.71362	2.52512	3	-2.8344	1.98718	-0.104591	0.705125	0.887086	FALSE	None
ITGB1	3	0.587369	0.0427316	3	0.735732	0.0373348	0.278332	0.0107754	0.128001	TRUE	None
ITGB4	3	-0.193536	0.0323204	3	-0.0969923	0.124978	0.119479	0.366542	0.678899	FALSE	None
ITGB5	3	-4.45416	0.550249	3	-4.75701	0.972959	-0.0242126	0.913762	0.950424	FALSE	None
JAK2	3	-0.00601402	0.0904196	3	0.126092	0.040946	0.146325	0.128646	0.413797	FALSE	None
JTB	3	-1.6745	0.152586	3	-1.06679	0.0414674	0.617953	0.000945175	0.0251863	TRUE	None
KAT6A	3	0.256143	0.0592749	3	-0.0395664	0.00500011	-0.289055	0.0256439	0.190444	TRUE	None
KAT7	3	-0.0215656	0.0651985	3	-0.303615	0.0234624	-0.272048	0.0171777	0.146911	TRUE	None
KCTD5	3	1.49587	0.164123	3	1.07669	0.136883	-0.125961	0.0947382	0.352479	FALSE	None
KDELR3	3	-0.222792	0.0810497	3	-0.414635	0.0274379	-0.14588	0.259445	0.573655	FALSE	None
KDM5A	3	0.143495	0.0539638	3	-0.0041163	0.0228276	-0.147287	0.281946	0.600771	FALSE	None
KDM5C	3	-1.5334	0.00640653	3	-1.30837	0.00355417	0.22726	0.113733	0.387781	FALSE	None
KDM6A	3	0.126727	0.0699067	3	0.00621185	0.0562693	-0.0941528	0.363736	0.678838	FALSE	None
KEAP1	3	2.00144	0.00162819	3	1.42381	0.00992593	-0.165183	0.0485532	0.239214	TRUE	None
KIAA0100	3	-1.12529	0.0693068	3	-0.994597	0.11843	0.162447	0.0829606	0.323318	FALSE	None
KHDC4	3	-0.205603	0.0202612	3	-0.215096	0.0143248	0.00998881	0.931872	0.961255	FALSE	None
RIC1	3	-1.14507	0.0424498	3	-0.623112	0.0181699	0.556339	9.69152e-05	0.00611777	TRUE	None
KIF14	3	-0.559195	0.0150816	3	-0.740346	0.0911653	-0.126248	0.397029	0.699824	FALSE	None
KIF18B	3	-0.0954247	0.036158	3	-0.158642	0.00645974	-0.0518999	0.64493	0.857079	FALSE	None
KIF4A	3	-0.28549	0.0516476	3	-0.589731	0.109617	-0.255364	0.0201944	0.161907	TRUE	None
KIRREL1	3	1.66995	0.0480641	3	1.59612	0.0229285	0.31347	0.00165157	0.0387926	TRUE	None
KLF10	3	-0.390339	0.0256249	3	-0.397123	0.036285	0.047975	0.683442	0.8749	FALSE	None
KLF4	3	-0.0546043	0.0433427	3	-0.373304	0.0947468	-0.302884	0.011513	0.128001	TRUE	None
KLF5	3	-0.21565	0.0490809	3	-0.708967	0.0265309	-0.431041	0.0175719	0.147897	TRUE	None
KMT2A	3	-1.41122	0.102114	3	-1.68879	0.0858619	-0.285515	0.0463123	0.23905	TRUE	None
KMT2C	3	-0.146281	0.0462444	3	-0.0714676	0.00561446	0.0830767	0.351741	0.666526	FALSE	None
KMT2D	3	0.0336447	0.041719	3	-0.131644	0.0648026	-0.144764	0.17229	0.487432	FALSE	None
KPNA4	3	-0.412952	0.0070295	3	-0.178637	0.0118417	0.279886	0.0124082	0.131919	TRUE	None
KRAS	3	-4.72956	1.07527	3	-4.30114	0.555523	0.593856	0.149767	0.444896	FALSE	None
L3MBTL3	3	1.08161	0.147381	3	0.469263	0.154473	-0.468729	0.000170283	0.00781752	TRUE	None
LAMTOR5	3	-1.82247	0.0611129	3	-2.27981	0.0079153	-0.474317	0.0112563	0.128001	TRUE	None
LARP7	3	0.374276	0.0456493	3	0.122112	0.133743	-0.218786	0.0365756	0.21579	TRUE	None
LCMT1	3	0.125713	0.0801013	3	0.156731	0.0265581	0.0465261	0.573885	0.819835	FALSE	None
LDHA	3	-0.306342	0.0948822	3	-0.44858	0.115612	-0.1107	0.206144	0.525772	FALSE	None
LDHB	3	-0.0811489	0.0100067	3	-0.128823	0.062262	-0.0329133	0.7049	0.887086	FALSE	None
LGR4	3	-0.043991	0.044508	3	0.0311592	0.00736007	0.0740935	0.402678	0.702205	FALSE	None
LIG1	3	-0.380887	0.0789043	3	-0.364472	0.0821733	0.0659616	0.542518	0.805901	FALSE	None
LIG3	3	-0.116587	0.0584692	3	-0.0487079	0.01812	0.0777961	0.365631	0.678838	FALSE	None
LIG4	3	-0.420123	0.00209353	3	-0.317512	0.00620408	0.139801	0.118908	0.400324	FALSE	None
LIMS1	3	-2.37841	1.90325	3	-2.69635	2.70451	-0.232482	0.411416	0.711259	FALSE	None
LIN28B	3	-0.39004	0.101213	3	-0.431025	0.156508	-0.00626771	0.944378	0.968268	FALSE	None
LIPT1	3	-0.240454	0.0904057	3	-0.110693	0.00269321	0.141789	0.254613	0.56768	FALSE	None
LMNA	3	-0.234373	0.0661179	3	-0.286835	0.17344	-0.0172886	0.901677	0.948656	FALSE	None
LMO2	3	-0.0193347	0.00399538	3	-0.144034	0.0201628	-0.107514	0.301039	0.624332	FALSE	None
LRP5	3	-0.541325	0.0316497	3	-0.53067	0.0424043	0.0598104	0.483244	0.762287	FALSE	None
LRP6	3	-0.565622	0.0163899	3	-0.534521	0.0360354	0.0815819	0.453919	0.738258	FALSE	None
LRRC45	3	-0.0285081	0.0820517	3	-0.100395	0.109619	-0.0521823	0.62985	0.849056	FALSE	None
LRRC49	3	-0.187298	0.039821	3	-0.460233	0.00173937	-0.229149	0.0297177	0.198729	TRUE	None
LYRM4	3	-3.29932	0.342216	3	-3.45227	0.908676	-0.115161	0.699865	0.887086	FALSE	None
MAD1L1	3	-0.900277	0.0635994	3	-0.916124	0.0616914	0.023974	0.792957	0.930275	FALSE	None
MAD2L2	3	-1.644	0.966113	3	-1.1656	0.2381	0.481231	0.0130957	0.134216	TRUE	None
MANF	3	-0.298592	0.142158	3	-0.136211	0.0774477	0.193161	0.0511244	0.245944	TRUE	None
MAP2K1	3	-0.264065	0.0578585	3	-0.481073	0.124954	-0.18305	0.251345	0.566649	FALSE	None
MAP2K4	3	0.134122	0.0472945	3	0.171522	0.128324	0.0568908	0.552928	0.809556	FALSE	None
MAP2K5	3	-1.89157	0.0695138	3	-1.99772	0.201869	-0.112021	0.545005	0.805994	FALSE	None
MAP3K1	3	-0.0539064	0.126835	3	-0.0111989	0.0294533	0.0724929	0.582027	0.825501	FALSE	None
MAP4K4	3	1.35451	0.0530131	3	1.10808	0.0363583	0.0299513	0.692086	0.882585	FALSE	None
MAPK1	3	-0.895723	0.107281	3	-0.770209	0.0521584	0.170815	0.0884892	0.335993	FALSE	None
MARCHF5	3	-0.024265	0.00572999	3	-0.0467474	0.0187294	-0.00902656	0.905648	0.948656	FALSE	None
MARK2	3	-2.41801	0.0270562	3	-1.62246	0.0664538	0.769421	0.000211573	0.00817024	TRUE	Positive
MAT2B	3	-0.0474313	0.0284085	3	-0.026353	0.178578	0.0454644	0.725236	0.900969	FALSE	None
MATR3	3	-1.08664	0.0839182	3	-1.36953	0.00830566	-0.271311	0.0219859	0.170814	TRUE	None
MBNL1	3	-1.34352	0.44861	3	-1.11609	0.281355	0.254046	0.0539612	0.249564	TRUE	None
MBTD1	3	-0.488427	0.0305916	3	-0.456575	0.0251519	0.101072	0.397026	0.699824	FALSE	None
MCCC2	3	-0.321642	0.0249346	3	-0.148248	0.00417589	0.176641	0.119397	0.400636	FALSE	None
MCL1	3	0.0416065	0.0222567	3	-0.269463	0.0971743	-0.302182	0.01601	0.141843	TRUE	None
MCM10	3	-1.299	0.624544	3	-1.80447	1.57606	-0.50458	0.0350321	0.214439	TRUE	None
MCM2	3	-3.79292	0.87478	3	-3.24973	0.822544	0.571468	0.0108664	0.128001	TRUE	None
MCM3	3	-2.25348	2.41398	3	-1.91435	1.37291	0.343957	0.0632842	0.276697	TRUE	None
MCM4	3	-2.35313	0.139758	3	-2.14336	0.111892	0.160752	0.219443	0.542777	FALSE	None
MCM5	3	-2.71544	2.22182	3	-2.87233	2.49694	-0.140173	0.51074	0.782773	FALSE	None
MCM6	3	-4.05888	3.36519	3	-3.09644	1.38402	1.07392	0.0483797	0.239214	TRUE	Positive
MCM7	3	-1.55561	0.826146	3	-1.2541	0.42243	0.304705	0.08246	0.323318	FALSE	None
MCM9	3	-0.375552	0.017492	3	-0.313203	0.0840559	0.104272	0.480004	0.762271	FALSE	None
MDH2	3	-0.0809925	0.0201126	3	-0.102219	0.0402966	-0.0125767	0.881521	0.946199	FALSE	None
MDK	3	-0.225478	0.156939	3	-0.331049	0.0718473	-0.0749888	0.488038	0.763031	FALSE	None
MDM2	3	-0.135759	0.0154875	3	-0.15365	0.0154405	-0.00220123	0.981419	0.988269	FALSE	None
MDM4	3	-0.0898783	0.0633124	3	-0.187641	0.00393334	-0.0859067	0.417909	0.714819	FALSE	None
MEAF6	3	-1.55209	0.00137037	3	-2.07709	0.260326	-0.533979	0.0262831	0.191913	TRUE	None
MED1	3	-2.42855	0.258381	3	-1.7539	0.215736	0.62564	1.71651e-05	0.00192631	TRUE	None
MED12	3	-1.97011	1.64305	3	-2.45015	1.0887	-0.479088	0.203298	0.521145	FALSE	None
MED13L	3	-0.131304	0.141768	3	-0.354477	0.0565597	-0.180849	0.192105	0.506987	FALSE	None
MED16	3	-0.44342	0.042071	3	-0.31528	0.088581	0.166912	0.159631	0.465976	FALSE	None
MED23	3	-1.22327	0.0582298	3	-1.52932	0.0195556	-0.29976	0.0452692	0.23905	TRUE	None
MED24	3	-1.79107	0.118692	3	-1.82793	0.0604569	-0.0725767	0.635271	0.849056	FALSE	None
MED25	3	-0.50526	0.00247973	3	-0.631294	0.0495846	-0.0823797	0.453734	0.738258	FALSE	None
MEN1	3	-0.932296	0.104138	3	-0.982722	0.0782285	-0.0223242	0.802517	0.930275	FALSE	None
MET	3	-0.141882	0.0380486	3	-0.201877	0.000729759	-0.028278	0.744436	0.906972	FALSE	None
MFSD9	3	-0.293725	0.0130735	3	-0.258805	0.0243636	0.0712561	0.436991	0.724515	FALSE	None
MGA	3	-0.216152	0.0340689	3	-0.375694	0.0310321	-0.113312	0.262874	0.577181	FALSE	None
MGAT1	3	-1.04774	0.146581	3	-0.786736	0.24716	0.298927	0.00459736	0.0748925	TRUE	None
MGAT5	3	-0.288834	0.00902517	3	-0.265068	0.00828562	0.0675209	0.426777	0.719608	FALSE	None
OGA	3	-0.0386616	0.0242018	3	-0.421948	0.0460447	-0.357283	0.0012437	0.0322087	TRUE	None
MGMT	3	-0.0234007	0.00331717	3	-0.052165	0.0378646	-0.0129367	0.898299	0.948656	FALSE	None
MIB1	3	-0.47078	0.0231775	3	-0.503033	0.0873097	0.022912	0.806821	0.930275	FALSE	None
MITF	3	-0.346069	0.0513134	3	-0.259949	0.0587148	0.126279	0.169342	0.48179	FALSE	None
MLH1	3	-0.3343	0.0344258	3	-0.269866	0.0826309	0.0943858	0.339315	0.662878	FALSE	None
MLH3	3	-0.0227106	0.0211149	3	-0.0831223	0.0043985	-0.0534189	0.573115	0.819835	FALSE	None
MAP3K20	3	0.00388525	0.0275345	3	-0.0065421	0.0163637	-0.000815266	0.99249	0.995447	FALSE	None
MMGT1	3	-1.47485	0.521447	3	-1.35482	0.485048	0.118687	0.347257	0.665909	FALSE	None
MNT	3	-0.106513	0.00569214	3	-0.15197	0.0127324	-0.0220564	0.790989	0.930275	FALSE	None
MOGS	3	-0.420097	0.00854551	3	-0.332855	0.0658897	0.125254	0.273183	0.589057	FALSE	None
MORC2	3	-0.214777	0.153901	3	-0.261897	0.282196	-0.0277274	0.790212	0.930275	FALSE	None
MPC1	3	-0.32458	0.0778291	3	-0.440427	0.240296	-0.0857014	0.437001	0.724515	FALSE	None
MPHOSPH8	3	-0.153682	0.0105046	3	-0.197091	0.0241916	-0.0151169	0.867464	0.945289	FALSE	None
MRE11	3	-1.71205	1.87497	3	-1.36114	0.761738	0.340985	0.0745815	0.306209	FALSE	None
MRPL28	3	-0.36398	0.00605052	3	-0.473253	0.0599398	-0.0668749	0.598903	0.833717	FALSE	None
MRPL41	3	-0.545898	0.0698402	3	-0.551165	0.0525284	0.0500648	0.608524	0.833833	FALSE	None
MRPS21	3	-0.564844	0.00702447	3	-0.895329	0.0717582	-0.281957	0.0264118	0.191913	TRUE	None
MSH2	3	-0.277509	0.0111606	3	-0.300551	0.00658086	0.019617	0.832634	0.933907	FALSE	None
MSH3	3	-0.145543	0.013087	3	-0.129983	0.0920447	0.0298014	0.814388	0.932522	FALSE	None
MSH6	3	-0.388086	0.0161396	3	-0.406473	0.012421	0.0393401	0.621465	0.844791	FALSE	None
MTF2	3	-0.79972	1.98257	3	-0.907254	1.0114	-0.0896539	0.560379	0.812026	FALSE	None
MTFMT	3	-0.32149	0.0381514	3	-0.345067	0.00126697	0.0230738	0.80252	0.930275	FALSE	None
MTG1	3	-0.110501	0.00325118	3	-0.264747	0.00957034	-0.140252	0.156754	0.460238	FALSE	None
MTHFD1L	3	0.00292762	0.0341244	3	-0.0603947	0.0299926	-0.0575905	0.557949	0.812026	FALSE	None
MTX1	3	-0.589598	0.028473	3	-0.513541	0.00619878	0.136869	0.217321	0.541962	FALSE	None
MUS81	3	-0.482264	0.00721834	3	-0.350731	0.00954414	0.174552	0.0835505	0.323318	FALSE	None
MYD88	3	-0.10371	0.04341	3	-0.413244	0.0155281	-0.264043	0.0276029	0.196331	TRUE	None
MYH9	3	-2.68218	0.409375	3	-1.7636	0.234969	0.857637	5.69173e-05	0.00410618	TRUE	Positive
MYL6	3	-0.304204	0.0372437	3	-0.021724	0.0130603	0.300952	0.0338687	0.211157	TRUE	None
MZT2B	3	-0.626086	0.0710107	3	-0.881383	0.00931704	-0.211931	0.0437495	0.23501	TRUE	None
NACC1	3	-0.438078	0.00412504	3	-0.533115	0.0132576	-0.0372433	0.694051	0.883974	FALSE	None
NADK	3	-0.377662	0.00337719	3	-0.347313	0.00910063	0.0619638	0.567408	0.81593	FALSE	None
NAGK	3	-0.0262715	0.061325	3	-0.103541	0.0733333	-0.0499051	0.732755	0.90397	FALSE	None
NAMPT	3	-0.0170077	0.0283425	3	-0.207962	0.0334165	-0.17796	0.131767	0.418503	FALSE	None
NBN	3	-0.0589067	0.0159836	3	-0.13737	0.013993	-0.0266038	0.857421	0.940277	FALSE	None
NCOR1	3	0.0973979	0.0119875	3	0.115673	0.00353356	0.0262616	0.785142	0.929652	FALSE	None
NCSTN	3	-1.41301	0.011707	3	-1.02316	0.0385033	0.402282	0.00621761	0.0910284	TRUE	None
NDUFA11	3	-0.148701	0.00434229	3	-0.16972	0.0449865	0.00569214	0.956639	0.973017	FALSE	None
NDUFAF3	3	-0.416422	0.00781424	3	-0.431732	0.012983	0.0343908	0.662393	0.86596	FALSE	None
NDUFAF6	3	-0.228435	0.00644258	3	-0.468557	0.0427071	-0.198739	0.0675128	0.288801	TRUE	None
NDUFB10	3	-0.333174	0.0626653	3	-0.316814	0.0718951	0.0460396	0.592678	0.833712	FALSE	None
NDUFB11	3	-0.443483	0.018967	3	-0.445694	0.0431837	0.0345503	0.633024	0.849056	FALSE	None
NDUFC1	3	-0.189861	0.0174615	3	-0.258495	0.0137796	-0.0462316	0.628638	0.84883	FALSE	None
NDUFS6	3	-0.128394	0.0687877	3	-0.162345	0.014239	-0.025617	0.829728	0.932878	FALSE	None
NEIL1	3	-0.920417	1.20019	3	-1.04544	0.719938	-0.134732	0.456559	0.740247	FALSE	None
NELFE	3	-0.505932	0.244763	3	-0.782167	0.25454	-0.259153	0.0369255	0.21579	TRUE	None
NEMF	3	-0.352195	0.0736491	3	-0.596841	0.10046	-0.214576	0.107382	0.381888	FALSE	None
NEO1	3	-0.03686	0.356575	3	-0.251734	0.292693	-0.193105	0.052007	0.245944	TRUE	None
NF1	3	-0.321995	0.0906046	3	-0.392536	0.260438	-0.0517592	0.619284	0.842961	FALSE	None
NF2	3	3.11465	0.0487694	3	2.11251	0.0421316	-0.23771	0.0107574	0.128001	TRUE	None
NFE2L1	3	-0.0493073	0.00415987	3	-2.08068	1.07178	-2.00008	2.50151e-06	0.000505304	TRUE	Negative
NFE2L2	3	-0.210584	0.0559395	3	-0.262299	0.0361675	-0.0188424	0.81372	0.932522	FALSE	None
NGLY1	3	-0.227375	0.0474523	3	-2.81237	1.28907	-2.5693	2.00596e-06	0.000505304	TRUE	Negative
NHEJ1	3	-0.411449	0.0100807	3	-0.242279	0.0226373	0.207963	0.0253806	0.190444	TRUE	None
NHLRC2	3	-1.98375	0.178301	3	-1.62323	0.0041543	0.346892	0.0470999	0.23905	TRUE	None
NKX2-1	3	0.177925	0.0239207	3	-0.0793765	0.0224289	-0.258569	0.0349635	0.214439	TRUE	None
NKX3-1	3	0.0469907	0.0121236	3	-0.0618495	0.0746929	-0.0906432	0.355491	0.670774	FALSE	None
NME6	3	-0.302599	0.0515162	3	-0.356915	0.0119769	-0.00280346	0.977336	0.987109	FALSE	None
NONO	3	-0.790626	0.136007	3	-0.432971	0.047951	0.391454	0.00675947	0.0961559	TRUE	None
NOP16	3	-3.06158	0.889176	3	-2.99415	0.0397973	0.0365584	0.887404	0.946199	FALSE	None
NOTCH1	3	0.0673645	0.0112108	3	-0.0603021	0.0292973	-0.124488	0.186946	0.501819	FALSE	None
NOTCH2	3	-0.25993	0.00469965	3	-0.261346	0.038388	0.0312991	0.735167	0.905511	FALSE	None
NOTCH3	3	-0.0287819	0.0374407	3	-0.0593419	0.079236	-0.0201444	0.822739	0.932522	FALSE	None
NPRL2	3	0.0268507	0.000606433	3	0.0103476	0.0198741	-0.0146017	0.877999	0.945477	FALSE	None
NRAS	3	-0.0173142	9.05228e-05	3	-0.103823	0.0086218	-0.0767112	0.350796	0.665985	FALSE	None
NSD1	3	-0.0875451	0.00266207	3	-0.0773904	0.0104786	0.0184485	0.870414	0.945289	FALSE	None
NSUN2	3	-0.194614	0.0242519	3	-0.00150896	0.011221	0.199341	0.0421872	0.232552	TRUE	None
NSUN3	3	-0.179395	0.00659217	3	-0.34712	0.00149264	-0.125542	0.262609	0.577181	FALSE	None
NUDT16L1	3	-0.245175	0.0151397	3	-0.234134	0.0615172	0.034032	0.823299	0.932522	FALSE	None
NUDT19	3	-0.593105	0.579571	3	-0.690835	0.581524	-0.0724495	0.567978	0.81593	FALSE	None
NUFIP2	3	-0.581327	0.044809	3	-0.256683	0.125946	0.356775	0.0309337	0.198729	TRUE	None
NXT1	3	0.694224	0.00171044	3	0.533362	0.0310946	-0.0498466	0.606025	0.833833	FALSE	None
OLA1	3	-0.7094	0.113109	3	-0.664203	0.0776363	0.0910197	0.463508	0.744487	FALSE	None
ORC1	3	-1.00995	0.0838917	3	-0.85502	0.060831	0.184145	0.110474	0.387083	FALSE	None
ORC2	3	-2.43445	1.39244	3	-2.49181	2.15043	-0.0664079	0.751881	0.912069	FALSE	None
OTUB1	3	-0.603622	0.0196676	3	-0.586657	0.00858795	0.069764	0.48773	0.763031	FALSE	None
OTUD5	3	0.821976	0.0157799	3	0.558964	0.0337219	-0.132185	0.114031	0.387781	FALSE	None
PAIP1	3	-0.40437	0.167722	3	-0.428807	0.115895	0.00539571	0.948058	0.968268	FALSE	None
PALB2	3	-1.08659	0.295957	3	-0.888825	0.139423	0.224364	0.0417313	0.231586	TRUE	None
APLF	3	-0.18372	0.00292245	3	-0.140821	0.0120185	0.056063	0.608478	0.833833	FALSE	None
PAPSS1	3	-0.138314	0.00834773	3	-0.230286	0.00125969	-0.0656948	0.393537	0.697787	FALSE	None
PARP1	3	-0.312432	0.035231	3	-0.160013	0.153491	0.172418	0.0834501	0.323318	FALSE	None
PARP10	3	-0.218617	0.0517531	3	-0.264224	0.0143252	-0.0130951	0.919247	0.953224	FALSE	None
PARP11	3	-0.295443	0.0020154	3	-0.400835	0.0179167	-0.0692632	0.451755	0.737113	FALSE	None
PARP12	3	-0.0242503	0.00536732	3	0.00406839	0.0163828	0.0334252	0.751667	0.912069	FALSE	None
PARP14	3	-0.139155	0.0195658	3	-0.137889	0.0554539	0.0144207	0.878257	0.945477	FALSE	None
PARP15	3	-0.200315	0.0155047	3	-0.326343	0.030933	-0.0839444	0.342363	0.665909	FALSE	None
PARP16	3	0.0583883	0.0976389	3	-0.212045	0.0812213	-0.259785	0.0470243	0.23905	TRUE	None
PARP2	3	-0.244097	0.0311971	3	-0.193223	0.0187681	0.0790009	0.553865	0.809556	FALSE	None
PARP3	3	-0.466401	0.0129872	3	-0.208772	0.0739523	0.284373	0.00621877	0.0910284	TRUE	None
PARP4	3	0.0908751	0.000430646	3	-0.128944	0.0207906	-0.206726	0.0833372	0.323318	FALSE	None
PARP6	3	-0.0196168	0.0259869	3	-0.0588135	0.0440552	-0.0343235	0.757441	0.913997	FALSE	None
PARP8	3	-0.287849	0.00732649	3	-0.31607	0.0243265	0.0125939	0.904963	0.948656	FALSE	None
PARP9	3	0.109796	0.0215433	3	0.150518	0.0490761	0.0377783	0.740916	0.906972	FALSE	None
PAWR	3	0.356774	0.0308291	3	0.308816	0.0346357	-0.0151588	0.878991	0.945477	FALSE	None
PAXIP1	3	0.716717	0.0133944	3	0.474519	0.0356332	-0.144781	0.185848	0.501819	FALSE	None
PBDC1	3	-0.066311	0.00703333	3	-0.208352	0.00603613	-0.126014	0.223785	0.544634	FALSE	None
PBRM1	3	-0.942088	0.165479	3	-0.530135	0.0767227	0.456931	0.00773808	0.107061	TRUE	None
PCBP1	3	-0.509726	0.00987495	3	-0.968175	0.0591799	-0.424558	0.0297334	0.198729	TRUE	None
PCGF3	3	-0.0306604	0.0297494	3	-0.056949	0.106376	-0.0139305	0.873276	0.945477	FALSE	None
PDCD10	3	1.20015	0.0335556	3	0.780497	0.00190051	-0.209814	0.0520121	0.245944	TRUE	None
PDCD5	3	-1.21228	0.0121017	3	-0.986135	0.0385802	0.242766	0.024032	0.182498	TRUE	None
PDCD6IP	3	-0.128354	0.0593629	3	-0.153599	0.003578	-0.00437038	0.976116	0.986864	FALSE	None
PDCL	3	-2.01887	0.0246366	3	-2.04568	0.0426848	-0.0393031	0.822571	0.932522	FALSE	None
PDGFRA	3	-0.429452	0.0113655	3	-0.217167	0.00942698	0.250497	0.011684	0.128001	TRUE	None
PDHA1	3	-0.245274	0.00204448	3	-0.321432	0.0362028	-0.0416218	0.654565	0.863528	FALSE	None
PDK1	3	-0.121026	0.00832219	3	-0.0934188	0.0269064	0.0516424	0.545882	0.805994	FALSE	None
PDS5A	3	-0.861676	0.0178658	3	-1.17324	0.0303317	-0.290238	0.0173093	0.146911	TRUE	None
PDSS1	3	-0.551219	0.283801	3	-0.361863	0.0699892	0.212461	0.195219	0.508173	FALSE	None
PELO	3	-1.58054	0.0159222	3	-0.949502	0.0107855	0.63609	0.000119429	0.00647579	TRUE	None
PFKM	3	-0.17708	0.00710975	3	-0.25497	0.00929096	-0.0413476	0.74711	0.909134	FALSE	None
PGAP2	3	-0.438474	0.0545868	3	-0.733145	0.0394852	-0.241964	0.0430458	0.233743	TRUE	None
PGLS	3	-0.300911	0.0877296	3	-0.168317	0.163448	0.162475	0.12301	0.408219	FALSE	None
PGM2	3	-0.0334713	0.032565	3	0.108131	0.0209384	0.14475	0.194583	0.507826	FALSE	None
PGP	3	-0.340492	0.00106051	3	-0.161706	0.0137412	0.21082	0.0467094	0.23905	TRUE	None
PHF12	3	-0.468984	0.0494534	3	-0.601844	0.0933915	-0.0920877	0.461821	0.744367	FALSE	None
PHGDH	3	-0.0414298	0.0347741	3	-0.0701298	0.0313339	-0.012593	0.910978	0.950424	FALSE	None
PHLPP1	3	0.0743686	0.0116433	3	0.13719	0.0284583	0.0633393	0.532398	0.801374	FALSE	None
PIAS1	3	-0.168868	0.00951592	3	-0.309191	0.0732448	-0.102592	0.323266	0.651421	FALSE	None
PIAS2	3	0.371317	0.0023687	3	0.139202	0.0188442	-0.213194	0.0159469	0.141843	TRUE	None
PIAS3	3	-0.249854	0.0406455	3	-0.296078	0.0882202	-0.0179844	0.886612	0.946199	FALSE	None
PIAS4	3	0.444365	0.0305849	3	0.243289	0.0524457	-0.165568	0.0876979	0.334245	FALSE	None
PICALM	3	-0.365824	0.00213728	3	-0.328695	0.0302823	0.0777148	0.389265	0.697787	FALSE	None
PIGB	3	-0.316436	0.0315018	3	-0.205463	0.03626	0.13423	0.230828	0.553807	FALSE	None
PIGF	3	-0.243958	0.00530278	3	-0.40264	0.0354113	-0.126206	0.221712	0.542777	FALSE	None
PIH1D1	3	-0.253183	0.00381734	3	-0.513112	0.0297534	-0.212477	0.0481701	0.239214	TRUE	None
PIK3CA	3	-0.40876	0.182049	3	-0.524393	0.112018	-0.0930892	0.393566	0.697787	FALSE	None
PIK3R1	3	-0.0159297	0.0345109	3	-0.183807	0.138972	-0.151335	0.098681	0.358517	FALSE	None
PIN1	3	0.049494	0.00243412	3	0.176383	0.0251456	0.126094	0.236221	0.554845	FALSE	None
PITRM1	3	-0.545483	0.01688	3	0.0735307	0.0303338	0.646253	6.00719e-06	0.00101121	TRUE	None
PKP2	3	-0.256634	0.181703	3	-0.287427	0.119435	-0.00813268	0.928109	0.958477	FALSE	None
PLAA	3	-0.133471	0.0268815	3	-0.233843	3.11036e-05	-0.064601	0.559834	0.812026	FALSE	None
PMAIP1	3	0.102051	0.0220242	3	0.113144	0.0464414	0.01873	0.837662	0.933907	FALSE	None
PMM2	3	0.048272	0.0833489	3	-0.105025	0.0189696	-0.132008	0.34653	0.665909	FALSE	None
PMS1	3	-0.128933	0.00106689	3	-0.111214	0.00759615	0.0318492	0.704653	0.887086	FALSE	None
PMS2	3	-0.169783	0.0580788	3	-0.17702	0.142961	0.0132451	0.902157	0.948656	FALSE	None
PNPO	3	-0.221407	0.000401834	3	-0.376643	0.0568809	-0.130114	0.329453	0.654762	FALSE	None
PNRC2	3	-0.681314	0.337174	3	-0.752603	0.132894	-0.0349839	0.80277	0.930275	FALSE	None
POLA1	3	-1.97814	1.02715	3	-1.9891	1.04846	-0.0172124	0.914649	0.950424	FALSE	None
POLB	3	-0.105399	0.0138715	3	0.0324756	0.0401763	0.137164	0.140044	0.430814	FALSE	None
POLD1	3	-0.270671	0.136565	3	-0.280444	0.0499581	0.0263464	0.804749	0.930275	FALSE	None
POLD3	3	-4.3117	5.89017	3	-3.97925	2.65017	0.644733	0.151451	0.447267	FALSE	None
POLE	3	-3.52112	4.00483	3	-3.26953	2.88821	0.425867	0.141844	0.431513	FALSE	None
POLE3	3	-1.11219	0.0573877	3	-1.04203	0.108347	0.0930189	0.442928	0.728596	FALSE	None
POLE4	3	-0.932941	0.0477939	3	-1.23281	0.000565762	-0.272548	0.161539	0.468833	FALSE	None
POLG2	3	-0.351047	0.0183989	3	-0.37364	0.012741	0.0258709	0.800525	0.930275	FALSE	None
POLH	3	-0.442222	0.103604	3	-0.453642	0.00804987	0.0263295	0.838667	0.933907	FALSE	None
POLI	3	-0.24423	0.174012	3	-0.240015	0.364572	0.0162926	0.864584	0.944798	FALSE	None
POLK	3	-0.159658	0.0341686	3	0.113306	0.0173229	0.263177	0.0117863	0.128001	TRUE	None
POLL	3	-0.240196	0.0171813	3	-0.253695	0.015016	0.00867782	0.942102	0.966994	FALSE	None
POLM	3	-0.185046	0.187193	3	-0.218018	0.097528	-0.00851196	0.948135	0.968268	FALSE	None
POLN	3	-0.108974	0.00575496	3	-0.188588	0.0445502	-0.0547183	0.618854	0.842961	FALSE	None
POLQ	3	-0.842307	0.00776773	3	-0.667408	0.0609182	0.213541	0.113731	0.387781	FALSE	None
POLR2G	3	-3.75166	0.317806	3	-4.0566	0.558659	-0.221577	0.596002	0.833717	FALSE	None
POT1	3	-1.58811	0.099483	3	-1.28547	0.00550325	0.299811	0.0603177	0.267197	TRUE	None
PPHLN1	3	-0.20165	0.0650373	3	-0.0960054	0.0441584	0.129818	0.239485	0.556957	FALSE	None
PPM1G	3	0.0597923	0.0235613	3	-0.17865	0.0687234	-0.220763	0.0136405	0.135067	TRUE	None
PPP1R18	3	-0.0185616	0.00820754	3	-0.136841	0.0360725	-0.106936	0.330626	0.654762	FALSE	None
PTPA	3	-0.528713	0.0365903	3	-0.364142	0.0135576	0.221323	0.0946313	0.352479	FALSE	None
PPP6R3	3	-0.0977807	0.0096391	3	0.0430616	0.0819653	0.158424	0.289412	0.610242	FALSE	None
SLC66A2	3	-0.0438627	0.00213484	3	-0.0358328	0.0295506	0.0245849	0.779554	0.926929	FALSE	None
PRDX1	3	-0.534843	0.0485111	3	-0.38257	0.0531014	0.209406	0.0439772	0.23501	TRUE	None
PRKAA1	3	-0.107157	0.00751868	3	-0.155489	0.0289123	-0.0289071	0.792237	0.930275	FALSE	None
PRKAG1	3	-0.189884	0.00435665	3	-0.340296	0.0381239	-0.106654	0.4292	0.721285	FALSE	None
PRKDC	3	-0.955244	0.106991	3	-0.626937	0.0617796	0.367274	0.01125	0.128001	TRUE	None
PRPF40B	3	-0.389859	0.0642761	3	-0.412419	0.0592065	0.0258179	0.834864	0.933907	FALSE	None
GINS3	3	-0.189381	0.0510788	3	-0.227342	0.0775289	-0.0153123	0.895175	0.948656	FALSE	None
PSMC3IP	3	-0.252893	0.0864915	3	-0.2179	0.0612647	0.0680248	0.606676	0.833833	FALSE	None
PSMD6	3	-1.92436	0.142645	3	-1.42713	0.307357	0.494904	0.00341128	0.061525	TRUE	None
PSPC1	3	0.140695	0.026114	3	0.154588	0.068008	0.0241474	0.788829	0.930275	FALSE	None
PTAR1	3	-1.4904	0.046769	3	-1.13021	0.0894263	0.363696	0.0425961	0.232552	TRUE	None
PTBP1	3	-0.916493	0.764005	3	-0.829415	0.309938	0.120082	0.326111	0.652222	FALSE	None
PTEN	3	1.92142	0.0111117	3	1.76297	0.0367305	0.291632	0.00467559	0.0749579	TRUE	None
PTK7	3	-0.268064	0.0277958	3	-0.483774	0.194348	-0.175353	0.26969	0.584522	FALSE	None
PXMP4	3	-0.370006	0.101958	3	-0.438697	0.0580211	-0.0231442	0.824497	0.932522	FALSE	None
PYCARD	3	-0.349082	0.0581365	3	-0.170405	0.0248713	0.193982	0.133787	0.418503	FALSE	None
QRICH1	3	-0.675284	0.151775	3	-0.84689	0.233623	-0.124385	0.241578	0.559619	FALSE	None
QSOX2	3	-0.239814	0.0450591	3	-0.446672	0.0852745	-0.164111	0.176662	0.494261	FALSE	None
RAB10	3	-1.00207	0.0355568	3	-1.03615	0.0736311	-0.0139495	0.923784	0.954986	FALSE	None
RAB40B	3	-0.0780759	0.0386923	3	-0.12359	0.0389357	-0.0341249	0.779165	0.926929	FALSE	None
RABL3	3	0.195576	0.0732865	3	0.273813	0.00227038	0.118267	0.294742	0.617613	FALSE	None
RABL6	3	-0.175817	0.0113157	3	-0.160892	0.0427276	0.0522036	0.543385	0.805901	FALSE	None
RAC2	3	0.0493918	0.0676833	3	-0.121378	0.000366033	-0.161689	0.262209	0.577181	FALSE	None
RAD1	3	-0.93041	0.0113198	3	-1.18026	0.266803	-0.230494	0.129162	0.414139	FALSE	None
RAD17	3	-1.0156	0.745148	3	-1.28247	0.946029	-0.260792	0.0310054	0.198729	TRUE	None
RAD18	3	-0.365744	0.0707193	3	-0.272354	0.112507	0.132923	0.232597	0.553807	FALSE	None
RAD50	3	-1.12599	0.0706787	3	-0.85548	0.131122	0.297914	0.029911	0.198729	TRUE	None
RAD51	3	-2.82733	0.19138	3	-2.80642	0.340598	-0.0256159	0.838631	0.933907	FALSE	None
RAD51B	3	-2.15119	0.0797174	3	-2.10737	0.489753	0.0130721	0.935979	0.962674	FALSE	None
RAD51C	3	-3.65277	0.523643	3	-3.77061	0.0760445	-0.0735298	0.823905	0.932522	FALSE	None
RAD51D	3	-2.38153	0.0458979	3	-2.2517	0.0261293	0.105409	0.674198	0.872083	FALSE	None
RAD52	3	-0.335703	0.205065	3	-0.341167	0.0951658	0.0381483	0.731689	0.90397	FALSE	None
RAD54B	3	-0.438857	0.253906	3	-0.473816	0.25829	0.00754594	0.951361	0.968623	FALSE	None
RAD54L	3	-0.453605	0.0363706	3	-0.357593	0.0850232	0.144983	0.140986	0.43133	FALSE	None
RAD54L2	3	-0.0363246	0.0651176	3	-0.126623	0.0977018	-0.0643599	0.654303	0.863528	FALSE	None
UBE2B	3	0.0704773	0.0013112	3	-0.0767918	0.012864	-0.129669	0.165236	0.474172	FALSE	None
RAI1	3	-0.425164	0.023553	3	-0.373543	0.0511603	0.0888343	0.394427	0.697787	FALSE	None
RALGAPB	3	1.09441	0.0546325	3	0.725413	0.0560973	-0.181504	0.0780027	0.310168	FALSE	None
RANBP1	3	-1.49501	0.319136	3	-1.70422	0.0985284	-0.221157	0.133345	0.418503	FALSE	None
RAP1A	3	-0.0618139	0.0118925	3	-0.150824	0.0334979	-0.0718534	0.553445	0.809556	FALSE	None
RARB	3	-0.491344	0.0420071	3	-0.532242	0.00212728	0.0106054	0.904653	0.948656	FALSE	None
RB1	3	0.797983	0.00968186	3	0.734	0.00437491	0.083875	0.333193	0.655994	FALSE	None
RB1CC1	3	0.27975	0.0508088	3	0.16144	0.0751698	-0.0851035	0.445379	0.730244	FALSE	None
RBM10	3	-0.114604	0.0128396	3	-0.0666903	0.0573869	0.0708205	0.529973	0.800884	FALSE	None
RBM18	3	-0.435631	0.016636	3	-0.307628	0.110364	0.186969	0.10464	0.376107	FALSE	None
RBP1	3	-0.0708518	0.0248007	3	-0.156791	0.0560399	-0.0773613	0.458073	0.740247	FALSE	None
RECQL	3	-0.00222087	0.0707194	3	0.230707	0.0333771	0.253701	0.0132887	0.134216	TRUE	None
RECQL4	3	0.105633	0.067526	3	0.149816	0.202319	0.0762103	0.540937	0.805901	FALSE	None
RECQL5	3	-0.0781871	0.00120195	3	0.0176648	0.00258337	0.0948732	0.303619	0.625827	FALSE	None
REST	3	-0.53557	0.139601	3	-0.557481	0.102559	-0.000408389	0.99751	0.99751	FALSE	None
RET	3	0.121318	0.0136879	3	0.00239794	0.000849632	-0.132404	0.235087	0.554761	FALSE	None
REV1	3	-0.834635	1.30222	3	-0.735091	0.89392	0.11698	0.403017	0.702205	FALSE	None
REV3L	3	-1.15963	0.28793	3	-1.1434	0.091634	0.0420622	0.712679	0.892884	FALSE	None
REXO2	3	-0.102982	0.0149883	3	0.0198522	0.0693664	0.134748	0.200787	0.518658	FALSE	None
COP1	3	-0.529653	0.0587409	3	-0.682816	0.04978	-0.103347	0.403246	0.702205	FALSE	None
RHBDD3	3	-0.284592	0.0526668	3	-0.300135	0.00216452	0.0238011	0.817148	0.932522	FALSE	None
RHNO1	3	-0.0723157	0.0492276	3	-0.111136	0.0332921	-0.0164287	0.853636	0.937144	FALSE	None
RHOBTB1	3	-0.27261	0.10097	3	-0.200587	0.0743416	0.0968337	0.383588	0.697066	FALSE	None
RIC8A	3	-2.08276	0.204522	3	-1.52034	0.0179881	0.534386	0.00179726	0.0412553	TRUE	None
RIF1	3	-0.829706	0.000534678	3	-0.828255	0.00828852	0.040573	0.742655	0.906972	FALSE	None
RMI1	3	-1.02848	1.01533	3	-1.15133	2.49417	-0.110328	0.594016	0.833717	FALSE	None
RMI2	3	-0.190749	0.00111676	3	-0.39778	0.0808255	-0.163241	0.110759	0.387083	FALSE	None
RMND1	3	-0.281201	0.0515135	3	-0.290579	0.00824792	0.03286	0.776079	0.926929	FALSE	None
RNF10	3	-0.20927	0.0267387	3	-0.462196	0.144896	-0.21733	0.0823779	0.323318	FALSE	None
RNF103	3	-0.0902519	0.0234154	3	-0.108907	0.0644666	0.0136489	0.903699	0.948656	FALSE	None
RNF11	3	-0.354363	0.135631	3	-0.355937	0.0045561	0.0355888	0.75317	0.912069	FALSE	None
RNF111	3	-0.0369828	0.00272649	3	-0.0158345	0.0240366	0.0276199	0.728974	0.903392	FALSE	None
RNF112	3	0.0376018	0.00131933	3	-0.0969731	0.0793485	-0.119463	0.344399	0.665909	FALSE	None
RNF113B	3	0.0630517	0.0106422	3	-0.0678	0.0412036	-0.130244	0.265783	0.579786	FALSE	None
RNF114	3	-0.125683	0.0378908	3	-0.367375	0.0819712	-0.193843	0.0304844	0.198729	TRUE	None
RNF115	3	-0.231053	0.062382	3	-0.507761	0.0186158	-0.221102	0.0201983	0.161907	TRUE	None
RNF121	3	-0.238907	0.0059622	3	-0.240262	0.00666487	0.0163121	0.829664	0.932878	FALSE	None
RNF122	3	-0.0742112	0.013383	3	-0.143924	0.0611602	-0.0608848	0.513984	0.785361	FALSE	None
RNF123	3	-0.353975	0.0883812	3	-0.366295	0.0584071	0.0178662	0.864193	0.944798	FALSE	None
RNF125	3	0.172923	0.0130569	3	0.109262	0.0330754	-0.0592835	0.602151	0.833717	FALSE	None
RNF126	3	0.145986	0.0238032	3	0.151412	0.104892	0.039354	0.740413	0.906972	FALSE	None
RNF128	3	0.0753273	0.0431747	3	-0.0680576	0.0142355	-0.14635	0.234135	0.55381	FALSE	None
RNF13	3	-0.296509	0.0451024	3	-0.275567	0.0180428	0.0796044	0.420516	0.716225	FALSE	None
RNF130	3	-0.149647	0.0373073	3	-0.36691	0.00666941	-0.181518	0.147777	0.44028	FALSE	None
RNF133	3	0.139176	0.00807666	3	0.0752354	0.0831244	-0.0491889	0.677792	0.8749	FALSE	None
RNF135	3	-0.141137	0.000837168	3	-0.178103	0.0790171	-0.00164328	0.989961	0.993897	FALSE	None
RNF138	3	0.124023	0.0374059	3	-0.0549918	0.0882436	-0.170656	0.122067	0.406891	FALSE	None
RNF139	3	-0.244736	0.0196494	3	-0.14414	0.0121272	0.11034	0.332414	0.655739	FALSE	None
RNF14	3	-0.271493	0.0799114	3	-0.342268	0.0976648	-0.027163	0.837655	0.933907	FALSE	None
RNF141	3	-0.108915	0.0171428	3	-0.0289437	0.00154955	0.0932618	0.264418	0.578058	FALSE	None
RNF144B	3	-0.12544	0.174275	3	-0.21689	0.15036	-0.0709019	0.378627	0.692595	FALSE	None
RNF145	3	-0.40495	0.0748031	3	-0.388847	0.261571	0.0311152	0.743385	0.906972	FALSE	None
RNF146	3	0.279754	0.0425816	3	0.22175	0.042726	-0.0319782	0.705408	0.887086	FALSE	None
RNF148	3	-0.13571	0.122476	3	-0.253825	0.0725345	-0.093696	0.462097	0.744367	FALSE	None
RNF149	3	-0.300438	0.253015	3	-0.273598	0.215529	0.0606844	0.639076	0.852665	FALSE	None
RNF150	3	-0.0796966	0.000774162	3	-0.0141286	0.00849172	0.0759471	0.385526	0.697066	FALSE	None
RNF151	3	0.0135657	0.0235489	3	-0.0748598	0.0466359	-0.0710555	0.360492	0.675504	FALSE	None
RNF152	3	0.0499927	0.0523245	3	-0.0619038	0.00598892	-0.112074	0.210488	0.529113	FALSE	None
RNF157	3	-0.0150665	0.0286427	3	-0.0591165	0.0164793	-0.036783	0.713423	0.892884	FALSE	None
RNF165	3	0.119788	0.169249	3	-0.0139108	0.23214	-0.104715	0.222599	0.543057	FALSE	None
RNF166	3	-0.0781492	0.00562025	3	-0.129084	0.0338113	-0.0372611	0.741753	0.906972	FALSE	None
RNF167	3	-0.260432	0.04155	3	-0.16787	0.0688484	0.116022	0.170938	0.484964	FALSE	None
RNF168	3	-0.590288	0.0527057	3	-0.443116	0.0434817	0.191052	0.167665	0.478367	FALSE	None
RNF169	3	-0.178896	0.0356352	3	-0.330523	0.0395999	-0.135956	0.165256	0.474172	FALSE	None
RNF17	3	-0.0983328	0.0113673	3	-0.0761696	0.0588678	0.0326077	0.744109	0.906972	FALSE	None
RNF170	3	-0.0302113	0.0207006	3	0.0203224	0.000430002	0.0598729	0.539353	0.805901	FALSE	None
RNF175	3	-0.118778	0.00112666	3	-0.109595	0.0235585	0.0230841	0.851851	0.937144	FALSE	None
RNF180	3	-0.218226	0.106067	3	-0.208729	0.0600529	0.0450339	0.577219	0.823434	FALSE	None
RNF181	3	-0.0627726	0.0565416	3	-0.394171	0.0734194	-0.289248	0.0578727	0.263295	TRUE	None
RNF182	3	-0.0490579	0.0190803	3	-0.0570259	0.0357043	0.0055045	0.946772	0.968268	FALSE	None
RNF183	3	-0.238603	0.0275345	3	-0.164127	0.0555384	0.098167	0.379213	0.692595	FALSE	None
RNF185	3	-0.378931	0.0313717	3	-0.387852	0.0519234	0.0345587	0.663982	0.86596	FALSE	None
RNF186	3	-0.282461	0.00872404	3	-0.309207	0.061335	0.00580819	0.96284	0.976369	FALSE	None
RNF187	3	0.00554662	0.0129957	3	0.0498763	0.0332099	0.0596142	0.623361	0.84503	FALSE	None
RNF19A	3	-0.219544	0.0348813	3	-0.2124	0.0799387	0.040403	0.683461	0.8749	FALSE	None
RNF19B	3	-0.265418	0.109585	3	-0.25706	0.0699673	0.0121634	0.888116	0.946199	FALSE	None
RNF2	3	0.271202	0.00318523	3	-0.0131466	0.00597675	-0.276409	0.00786563	0.107355	TRUE	None
RNF207	3	-0.0902379	0.0313621	3	-0.219442	0.0734391	-0.104625	0.311182	0.636222	FALSE	None
RNF208	3	-0.020708	0.0353716	3	-0.0642239	0.0306399	-0.0449903	0.674353	0.872083	FALSE	None
RNF212	3	-0.0721773	0.0165094	3	-0.0657199	0.0177137	0.0251146	0.7777	0.926929	FALSE	None
RNF213	3	-0.167269	0.0484811	3	-0.0792991	0.031786	0.0927655	0.247296	0.565017	FALSE	None
RNF214	3	0.628681	0.0540437	3	0.0696298	0.137174	-0.512958	0.000875506	0.0245628	TRUE	None
RNF215	3	-0.254957	0.00371651	3	-0.223949	0.0256441	0.0448699	0.545799	0.805994	FALSE	None
RNF216	3	-0.218521	0.0021457	3	-0.372592	0.068637	-0.115917	0.284357	0.602097	FALSE	None
RNF217	3	-0.371171	0.00182866	3	-0.509979	0.0263353	-0.0866764	0.406002	0.704575	FALSE	None
OBI1	3	-0.000892832	0.0707048	3	0.157444	0.0116878	0.155076	0.232574	0.553807	FALSE	None
RNF220	3	-0.139422	0.100919	3	0.0351452	0.0842247	0.20246	0.0254685	0.190444	TRUE	None
RNF222	3	-0.31476	0.0333797	3	-0.354741	0.00467639	-0.0149742	0.903138	0.948656	FALSE	None
RNF223	3	-0.286155	0.0494501	3	-0.36734	0.0597514	-0.0478728	0.582755	0.825501	FALSE	None
RNF24	3	0.0681466	0.0338947	3	-0.0772275	0.0115665	-0.136546	0.186396	0.501819	FALSE	None
RNF25	3	-0.807902	0.0390773	3	-0.712132	0.00638195	0.1365	0.29631	0.619421	FALSE	None
RNF26	3	-0.109567	0.127626	3	-0.197598	0.102316	-0.0713644	0.523011	0.794005	FALSE	None
RNF31	3	-0.938562	0.19046	3	-1.0791	0.0493673	-0.119854	0.530278	0.800884	FALSE	None
RNF32	3	-0.0310377	0.0103589	3	-0.0853895	0.0808491	-0.0288263	0.754037	0.912069	FALSE	None
RNF34	3	0.00838487	0.00748847	3	-0.095281	0.00387255	-0.0931261	0.391632	0.697787	FALSE	None
RNF38	3	-0.201979	0.0198087	3	-0.351727	0.143261	-0.121362	0.243408	0.561657	FALSE	None
RNF39	3	-0.298753	0.121745	3	-0.391454	0.161339	-0.0683414	0.569433	0.81593	FALSE	None
RNF4	3	-0.852907	0.0283521	3	-0.909307	0.107591	-0.0252279	0.797153	0.930275	FALSE	None
RNF40	3	-1.74308	0.258295	3	-2.10598	0.669073	-0.378584	0.0848274	0.327006	FALSE	None
RNF41	3	-0.0992171	0.00482084	3	-0.250635	0.0107348	-0.129477	0.179232	0.497319	FALSE	None
RNF43	3	-0.3936	0.193879	3	-0.297599	0.222802	0.130244	0.326107	0.652222	FALSE	None
RNF44	3	-0.191127	0.0125914	3	-0.137536	0.0130343	0.0758895	0.4461	0.730244	FALSE	None
RNF5	3	-0.753268	0.988569	3	-0.936064	1.28615	-0.154246	0.140335	0.430814	FALSE	None
RNF6	3	0.0421716	0.0107924	3	0.00509076	0.0597261	-0.0338562	0.733022	0.90397	FALSE	None
RNF7	3	0.0795107	3.0882	3	-0.243157	3.91713	-0.185005	0.220862	0.542777	FALSE	None
RNF8	3	-0.727186	0.384637	3	-1.09278	0.461289	-0.332308	0.014721	0.136406	TRUE	None
RNH1	3	-0.413957	0.121147	3	-0.311498	0.0245077	0.141363	0.201585	0.51939	FALSE	None
ROBO1	3	0.0342362	0.00106155	3	-0.108674	0.00180755	-0.134732	0.173804	0.488975	FALSE	None
ROBO2	3	0.0418049	0.0904152	3	-0.0299245	0.0526722	-0.0579336	0.502123	0.776662	FALSE	None
ROCK2	3	0.171975	0.0199701	3	0.352323	0.0210599	0.191563	0.0475926	0.239214	TRUE	None
ROR2	3	-0.3527	0.238218	3	-0.3918	0.463984	-0.0239976	0.807774	0.930275	FALSE	None
RPA1	3	-3.50562	3.22706	3	-3.3636	2.84646	0.325958	0.348354	0.665909	FALSE	None
RPA2	3	-2.71245	0.479928	3	-2.898	1.35294	-0.225155	0.426023	0.719537	FALSE	None
RPA3	3	-2.78691	6.31	3	-2.8558	7.44634	-0.0299688	0.918983	0.953224	FALSE	None
RPL36	3	-2.12716	0.879483	3	-2.18847	0.583258	-0.0789462	0.654875	0.863528	FALSE	None
RPP25L	3	-2.80341	1.22984	3	-2.14107	0.494941	0.634869	0.0036109	0.0639825	TRUE	None
RPS25	3	-3.14731	2.44077	3	-2.72651	2.25117	0.465056	0.212031	0.530154	FALSE	None
RPS3	3	-3.41125	3.36379	3	-3.28702	1.62066	0.166851	0.547437	0.805994	FALSE	None
RPS6KB1	3	-0.327327	0.00216557	3	-0.337474	0.00604478	0.0333393	0.701542	0.887086	FALSE	None
RPSA	3	-6.08118	1.80087	3	-5.01912	0.816819	1.46118	0.0285884	0.198729	TRUE	Positive
RPUSD3	3	-0.391367	0.0721295	3	-0.566963	0.132661	-0.140041	0.219929	0.542777	FALSE	None
CNOT9	3	-0.527179	0.0167132	3	-0.51917	0.237905	0.0444841	0.679632	0.8749	FALSE	None
RRAGA	3	-0.544129	0.169006	3	-0.741581	0.216712	-0.169024	0.109637	0.387083	FALSE	None
RUNX1	3	1.64418	0.228838	3	1.6056	0.143716	0.355552	0.00058652	0.0179511	TRUE	None
RWDD1	3	-0.238963	0.0128392	3	-0.325618	0.00950694	-0.0692482	0.508767	0.782773	FALSE	None
SAP30	3	0.364109	0.0149791	3	0.279474	0.00654106	-0.0599453	0.432596	0.723288	FALSE	None
SART3	3	-3.71441	0.79974	3	-3.93523	1.72469	-0.148245	0.662868	0.86596	FALSE	None
SBDS	3	-3.55821	0.0169005	3	-3.0044	0.140986	0.529298	0.0212086	0.166052	TRUE	None
SCAP	3	-3.26982	0.264303	3	-3.11724	0.203717	0.121954	0.602588	0.833717	FALSE	None
SCAPER	3	-0.149614	0.0755552	3	-0.312702	0.0289462	-0.14613	0.124271	0.408219	FALSE	None
SCD	3	-1.53963	0.203215	3	-1.36133	0.19472	0.168612	0.208331	0.528678	FALSE	None
SCNM1	3	-1.39325	3.59365	3	-1.4462	2.48426	-0.0445311	0.765993	0.918827	FALSE	None
SDHB	3	-0.204146	0.0423889	3	-0.224667	0.04412	0.0115653	0.910835	0.950424	FALSE	None
SDHD	3	-0.209266	0.0056496	3	-0.34664	0.00771189	-0.0980504	0.22751	0.549725	FALSE	None
SDK1	3	-0.0281305	0.0146266	3	-0.263411	0.0411624	-0.209022	0.019981	0.161907	TRUE	None
SEMA3A	3	0.705538	0.0383888	3	0.40638	0.0133833	-0.218139	0.139667	0.430814	FALSE	None
SEMA3E	3	-0.0451328	0.0342127	3	-0.206135	0.0211758	-0.157126	0.1941	0.507826	FALSE	None
SENP1	3	-0.0498835	0.00256342	3	0.0233153	0.0518444	0.0828012	0.494284	0.771603	FALSE	None
SENP2	3	-0.287393	0.00822592	3	-0.302385	0.00524911	0.0107943	0.899358	0.948656	FALSE	None
SEPHS1	3	-1.00761	0.0288732	3	-1.06937	0.0301879	-0.0435909	0.74088	0.906972	FALSE	None
SEPHS2	3	-0.329879	0.0268016	3	-0.351779	0.0208235	0.0311043	0.79109	0.930275	FALSE	None
SEPTIN11	3	0.027974	0.00297859	3	-0.112937	0.0338075	-0.131157	0.191412	0.506987	FALSE	None
SERPIND1	3	-0.37491	0.000741588	3	-0.309192	0.0033993	0.107749	0.370508	0.684119	FALSE	None
SETD1B	3	0.984925	0.00748775	3	1.05093	0.0374852	0.285662	0.0130316	0.134216	TRUE	None
SETD2	3	-0.766101	0.217768	3	-0.935908	0.244964	-0.127843	0.259019	0.573655	FALSE	None
KMT5A	3	-0.721839	0.289949	3	-0.735591	0.248335	0.0175551	0.874872	0.945477	FALSE	None
SETDB1	3	0.428698	0.0160187	3	0.292477	0.122865	-0.0918646	0.423897	0.719431	FALSE	None
RSKR	3	-0.511864	0.0237344	3	-0.401175	0.0100392	0.158502	0.126066	0.40941	FALSE	None
SGSM2	3	-0.421659	0.00898988	3	-0.28838	0.0277079	0.195828	0.0728775	0.300434	FALSE	None
SHKBP1	3	0.0537353	0.026167	3	-0.0118973	0.0572737	-0.0717243	0.503208	0.777126	FALSE	None
SHMT1	3	-0.170576	0.0341866	3	-0.104626	0.0261269	0.0904213	0.306913	0.630046	FALSE	None
SHMT2	3	-0.0745146	0.0722042	3	-0.242567	0.169281	-0.149176	0.177515	0.494706	FALSE	None
SHPRH	3	-0.0338724	0.00450612	3	-0.131063	0.0809303	-0.0903583	0.365031	0.678838	FALSE	None
SIRT6	3	0.238595	0.00522727	3	0.0843181	0.016052	-0.160726	0.0694866	0.292423	TRUE	None
SKI	3	-0.348516	0.0183189	3	-0.477576	0.115698	-0.103124	0.286032	0.604377	FALSE	None
SLC16A1	3	0.0537962	0.0604016	3	-0.168599	0.0883271	-0.194087	0.0985246	0.358517	FALSE	None
SLC16A10	3	0.00745278	0.0015696	3	-0.0741104	0.0688324	-0.0667307	0.521702	0.794005	FALSE	None
SLC16A3	3	0.109967	0.04531	3	0.138342	0.0391298	0.0389121	0.706156	0.887086	FALSE	None
SLC1A5	3	-0.118148	0.0783358	3	-0.208354	0.111411	-0.0691294	0.486204	0.762524	FALSE	None
SLC20A1	3	-0.223201	0.0193063	3	0.0194199	0.0244284	0.269894	0.0168011	0.146911	TRUE	None
SLC25A1	3	-0.241079	0.0153801	3	-0.540281	0.0315778	-0.245786	0.0395936	0.22593	TRUE	None
SLC25A28	3	-0.248636	0.00630402	3	-0.541881	0.0232031	-0.24505	0.0140232	0.135514	TRUE	None
SLC25A32	3	-0.347273	0.00565803	3	-0.44667	0.0662729	-0.0398999	0.763373	0.918827	FALSE	None
SLC25A37	3	0.0184669	0.0358721	3	-0.0916294	0.0342106	-0.0940329	0.316784	0.643766	FALSE	None
SLC26A6	3	-0.216685	0.141761	3	-0.298882	0.20311	-0.0395355	0.682566	0.8749	FALSE	None
SLC2A1	3	-0.556841	0.0344198	3	-0.547893	0.081462	0.0523621	0.547292	0.805994	FALSE	None
SLC33A1	3	-0.0698558	0.0386753	3	0.109813	0.0410741	0.196097	0.0645109	0.280845	TRUE	None
SLC35A1	3	-0.271517	0.00246189	3	-0.0988435	0.0550693	0.208723	0.0329655	0.206802	TRUE	None
SLC35B2	3	0.0695756	0.0373844	3	-0.329937	0.00917921	-0.383851	0.00373845	0.0651006	TRUE	None
SLC38A2	3	-0.358661	0.0431701	3	-0.333953	0.0272802	0.0459207	0.697196	0.885746	FALSE	None
SLC39A9	3	0.553376	0.0563794	3	0.240185	0.126581	-0.248497	0.0141978	0.135514	TRUE	None
SLC3A2	3	-0.682613	0.1435	3	-0.582594	0.0922365	0.154108	0.098632	0.358517	FALSE	None
SLC4A2	3	-0.0308496	0.00271817	3	0.0286537	0.0107574	0.05893	0.635531	0.849056	FALSE	None
SLC7A1	3	-0.0604922	0.0124889	3	-0.275648	0.00502508	-0.189572	0.0939018	0.352479	FALSE	None
SLC7A11	3	-0.492284	0.105988	3	-0.488706	0.0259411	0.0566512	0.646877	0.858536	FALSE	None
SLC7A5	3	-0.461719	0.193081	3	-0.43252	0.176852	0.0697861	0.505407	0.77933	FALSE	None
GINS4	3	-1.16414	1.26801	3	-1.04409	0.813237	0.106046	0.523572	0.794005	FALSE	None
SLFN11	3	-0.257452	0.0471498	3	-0.182558	0.0732792	0.0895336	0.31277	0.63689	FALSE	None
SLIT2	3	0.0441949	0.00517508	3	-0.0795414	0.00275513	-0.126563	0.147112	0.439595	FALSE	None
SLX1A	3	-0.39962	0.0949022	3	-0.301303	0.113517	0.1272	0.239396	0.556957	FALSE	None
SLX4	3	-1.36136	0.0382074	3	-1.13484	0.00973317	0.234067	0.143205	0.432222	FALSE	None
SMAD2	3	-0.02076	0.006889	3	0.0737373	0.094206	0.100092	0.338576	0.662717	FALSE	None
SMAD4	3	-0.560367	0.054744	3	-0.0800383	0.0612853	0.506891	0.000513043	0.0161929	TRUE	None
SMARCA1	3	0.138972	0.0433634	3	0.0313757	0.00153459	-0.112874	0.210597	0.529113	FALSE	None
SMARCA4	3	-0.285115	0.193458	3	-0.101629	0.00469596	0.211783	0.231547	0.553807	FALSE	None
SMARCAL1	3	0.0170655	0.0144866	3	-0.149987	0.135479	-0.144346	0.17283	0.487593	FALSE	None
SMARCB1	3	-1.89355	0.757021	3	-1.23431	0.454584	0.654747	2.38338e-05	0.00240721	TRUE	None
SMARCC1	3	-0.433933	0.0568545	3	-0.333929	0.10769	0.143697	0.0858056	0.32952	FALSE	None
SMARCD1	3	0.446825	0.170888	3	0.21749	0.100008	-0.176427	0.0279911	0.197699	TRUE	None
PPP4R3A	3	-0.162144	0.170074	3	-0.0714233	0.13183	0.138175	0.16411	0.473573	FALSE	None
SNAP23	3	-0.422208	0.0259208	3	-0.792144	0.0218709	-0.307308	0.0153159	0.139103	TRUE	None
SOD2	3	-0.348394	0.0170895	3	-0.323915	0.0048782	0.0715266	0.434613	0.724355	FALSE	None
SOX2	3	-0.0816186	0.00250982	3	-0.234775	0.102337	-0.123067	0.290741	0.610547	FALSE	None
SOX9	3	-0.415864	0.209319	3	-0.508814	0.12723	-0.0584608	0.59746	0.833717	FALSE	None
SPEN	3	-1.05702	0.126746	3	-0.845536	0.139148	0.235913	0.0416693	0.231586	TRUE	None
SPOP	3	0.632157	0.126409	3	-0.000524907	0.0818901	-0.583575	4.16877e-05	0.00323881	TRUE	None
SPTLC2	3	-1.45475	0.248384	3	-0.918081	0.140099	0.558528	0.000652804	0.0193921	TRUE	None
SRM	3	-0.292307	0.0843489	3	-0.34029	0.0378599	0.00176008	0.988457	0.993897	FALSE	None
SRPRA	3	-1.95082	3.56732	3	-2.93042	6.67371	-0.841177	0.00440848	0.0742094	TRUE	Negative
SRSF5	3	-0.19964	0.0309696	3	-0.228746	0.0190368	-0.000559592	0.996018	0.997142	FALSE	None
NABP2	3	-0.0345423	0.0184044	3	-0.257269	0.0365212	-0.207546	0.0424766	0.232552	TRUE	None
NABP1	3	-0.279418	0.0811304	3	-0.274969	0.0324452	0.0281363	0.799153	0.930275	FALSE	None
SSBP1	3	-0.303918	0.0235529	3	-0.228043	0.043198	0.111851	0.16629	0.475788	FALSE	None
SSR3	3	-0.47353	0.0612459	3	-0.551088	0.012139	-0.051066	0.697163	0.885746	FALSE	None
STAG1	3	0.0427086	0.00256402	3	0.00424333	0.0773633	-0.0235018	0.81091	0.932522	FALSE	None
STAG2	3	0.640381	0.0223472	3	0.521568	0.00656392	-0.0242857	0.7808	0.926929	FALSE	None
STIP1	3	0.805371	0.0213528	3	0.752969	0.0147495	0.109656	0.208323	0.528678	FALSE	None
STK11	3	-2.34929	0.795734	3	-3.21685	3.2547	-0.803765	0.0438655	0.23501	TRUE	Negative
STOML2	3	-0.268846	0.0352441	3	-0.190106	0.00577509	0.114984	0.355975	0.670774	FALSE	None
CENPX	3	-0.290809	5.05882e-05	3	-0.187587	0.030457	0.142065	0.221948	0.542777	FALSE	None
STRAP	3	-3.31216	0.283853	3	-3.10669	0.0484742	0.171759	0.516617	0.788192	FALSE	None
STT3A	3	-1.34415	0.0477911	3	-0.962797	0.113306	0.398086	0.00214714	0.0461407	TRUE	None
STUB1	3	-1.50814	0.0188801	3	-1.27443	0.0743414	0.249051	0.0654785	0.283834	TRUE	None
STX4	3	-0.131424	0.0004355	3	-0.20319	0.00732738	-0.052634	0.60198	0.833717	FALSE	None
SUMO1	3	-0.233556	0.484661	3	-0.403674	0.730158	-0.172368	0.113236	0.387781	FALSE	None
SUMO2	3	-0.33676	0.0288241	3	-0.463813	0.232637	-0.0827321	0.530487	0.800884	FALSE	None
SUMO3	3	0.0485622	0.0366781	3	-0.0786448	0.0960428	-0.119405	0.258155	0.573655	FALSE	None
SUPT20H	3	-0.112728	0.108615	3	-0.0380339	0.0685131	0.0890873	0.439778	0.726314	FALSE	None
SURF1	3	-0.261867	0.0861358	3	-0.26584	0.0427055	0.040647	0.688729	0.880527	FALSE	None
SUV39H1	3	-0.583554	0.0787551	3	-0.443865	0.133558	0.168182	0.077733	0.310168	FALSE	None
SUZ12	3	0.102988	0.00123464	3	-0.276801	0.0416237	-0.364321	0.00552971	0.0859232	TRUE	None
SYVN1	3	-0.446623	0.0343472	3	-0.527933	0.128565	-0.0467827	0.704797	0.887086	FALSE	None
TACO1	3	-0.109131	0.0150447	3	-0.366845	0.00619793	-0.220796	0.126753	0.410322	FALSE	None
TADA1	3	0.0549786	0.00984922	3	0.108722	0.100571	0.0601696	0.624151	0.84503	FALSE	None
TADA2B	3	-0.124079	0.0711116	3	-0.350536	0.00803782	-0.183377	0.0773536	0.310028	FALSE	None
TAF4	3	-1.26472	0.081548	3	-1.39851	0.416327	-0.115895	0.596639	0.833717	FALSE	None
TAF5L	3	0.270086	0.033788	3	0.204869	0.00922867	-0.0607258	0.425248	0.719431	FALSE	None
TANK	3	-0.448501	0.239468	3	-0.503638	0.300391	-0.0269331	0.815749	0.932522	FALSE	None
TAOK1	3	1.71489	0.00936993	3	1.40556	0.0137132	0.0555456	0.502139	0.776662	FALSE	None
TAPT1	3	-0.312214	0.0152009	3	-0.514206	0.00431389	-0.151535	0.0958212	0.353414	FALSE	None
WWTR1	3	-0.327219	0.00685078	3	-0.0902559	0.0972583	0.250058	0.0190995	0.158485	TRUE	None
TEAD4	3	-0.704785	0.0501035	3	-0.389757	0.0298197	0.374559	0.00912782	0.119729	TRUE	None
TECR	3	-0.681166	0.205565	3	-0.843341	0.500291	-0.146852	0.33559	0.659428	FALSE	None
TELO2	3	-2.3027	0.559334	3	-2.23011	0.874768	0.0378439	0.819125	0.932522	FALSE	None
TEN1	3	-0.575427	0.027957	3	-0.467756	0.0603657	0.137555	0.308531	0.632082	FALSE	None
TERT	3	-0.279457	0.0198825	3	-0.213686	0.0011064	0.0978477	0.320812	0.649339	FALSE	None
TET2	3	-0.0239532	0.0177999	3	-0.279936	0.00138705	-0.217158	0.0519856	0.245944	TRUE	None
TFAP4	3	-0.367325	1.60306	3	-0.397908	1.11389	-0.0149889	0.900669	0.948656	FALSE	None
TFDP1	3	-0.616911	0.102118	3	-0.848474	0.233981	-0.183988	0.0691929	0.292405	TRUE	None
TFPT	3	-0.757342	0.000758739	3	-0.516658	0.0180712	0.29843	0.00848271	0.113589	TRUE	None
TFRC	3	-0.11407	0.0215775	3	-0.0535236	0.0400376	0.0863735	0.342972	0.665909	FALSE	None
TGFBR2	3	-0.34491	0.0148478	3	-0.0550186	0.0451827	0.316083	0.0110527	0.128001	TRUE	None
TGIF2	3	-0.189977	0.018419	3	-0.339357	0.145604	-0.121635	0.252034	0.566856	FALSE	None
THAP10	3	-0.10128	0.0387979	3	-0.318956	0.0729995	-0.184952	0.0362249	0.21579	TRUE	None
THAP3	3	-0.152679	0.0615471	3	-0.149957	0.138143	0.0143482	0.911678	0.950424	FALSE	None
TIMM17A	3	-0.67378	0.00742586	3	-0.617102	0.0340002	0.106293	0.394492	0.697787	FALSE	None
TIMM8A	3	-0.738674	0.114873	3	-0.418786	0.182277	0.356861	0.00244759	0.0504504	TRUE	None
TIMM8B	3	-0.500726	0.0538011	3	-0.581544	0.0854522	-0.0494283	0.55582	0.81124	FALSE	None
TIMMDC1	3	-0.190193	0.10234	3	-0.285584	0.114949	-0.0750262	0.427721	0.719997	FALSE	None
TINF2	3	-1.55858	1.33592	3	-1.40935	1.98969	0.16733	0.495476	0.77227	FALSE	None
TIPARP	3	-3.06892	0.70525	3	-3.62025	1.36287	-0.487376	0.0593883	0.265416	TRUE	None
TIPIN	3	-2.28517	5.02824	3	-2.47327	4.64242	-0.183721	0.569535	0.81593	FALSE	None
TIPRL	3	-0.552988	0.0371249	3	-0.213739	0.0846692	0.370803	0.00329099	0.0604346	TRUE	None
TKT	3	-0.505672	0.0299203	3	-0.376088	0.014713	0.177259	0.0985268	0.358517	FALSE	None
TLCD1	3	-0.716152	0.0111602	3	-0.55808	0.0949696	0.199153	0.123897	0.408219	FALSE	None
TM2D1	3	-0.208384	0.000626826	3	-0.250986	0.000315605	-0.0133249	0.876422	0.945477	FALSE	None
TM2D2	3	-0.278896	0.00302031	3	-0.325074	0.0170847	0.00437774	0.963932	0.976369	FALSE	None
TM2D3	3	-0.313731	0.0218257	3	-0.342824	0.0589507	0.0170673	0.853017	0.937144	FALSE	None
TMCO1	3	-0.00402766	0.0204653	3	-0.299417	0.0222827	-0.282357	0.0140035	0.135514	TRUE	None
TMEM165	3	0.116819	0.0376624	3	0.0364188	0.0354128	-0.0638741	0.446895	0.730363	FALSE	None
TMEM208	3	0.15215	0.00566877	3	-0.0507955	5.19659e-05	-0.206662	0.0145652	0.136212	TRUE	None
TNKS	3	-0.276936	0.0096019	3	-0.327368	0.000939935	-0.0272589	0.8213	0.932522	FALSE	None
TNPO1	3	-2.77588	0.0212081	3	-2.39855	0.425356	0.335528	0.160818	0.468088	FALSE	None
TOMM70	3	-1.24161	0.113022	3	-0.79767	0.122211	0.466147	0.000301832	0.0101617	TRUE	None
TOPBP1	3	-3.96663	1.62991	3	-4.63111	5.04846	-0.386949	0.327187	0.653004	FALSE	None
TP53	3	-0.623953	0.806097	3	-0.633919	0.39849	0.0246157	0.842557	0.937144	FALSE	None
TP53BP1	3	-0.630781	0.0401651	3	-0.367963	0.0394482	0.289154	0.0154253	0.139103	TRUE	None
TP73	3	-0.0111424	0.0101351	3	0.124264	0.0240048	0.13676	0.183317	0.501819	FALSE	None
TPGS1	3	0.01971	0.0760275	3	-0.0515802	0.00738362	-0.0625734	0.587314	0.830794	FALSE	None
TPP1	3	-0.248839	0.0998683	3	-0.220398	0.134534	0.0667358	0.401488	0.702205	FALSE	None
TPT1	3	-2.321	0.370455	3	-1.98425	0.0553553	0.300922	0.192253	0.506987	FALSE	None
TREX1	3	-0.302607	0.0403406	3	-0.364164	0.0323125	-0.0242025	0.851278	0.937144	FALSE	None
TERF1	3	-0.337967	0.0339553	3	-0.47524	0.392436	-0.10536	0.512426	0.784167	FALSE	None
TERF2	3	-2.99418	1.98202	3	-2.83927	2.29237	0.195141	0.25352	0.567357	FALSE	None
TRIM28	3	-0.406816	0.0331158	3	-0.405258	0.0666263	0.0473734	0.714688	0.89336	FALSE	None
TRIM37	3	-0.84849	0.138628	3	-0.904189	0.171054	-0.030612	0.794371	0.930275	FALSE	None
TRIM71	3	-0.120566	0.0462753	3	-0.0904794	0.0546105	0.0551214	0.644653	0.857079	FALSE	None
TRUB2	3	-0.322871	0.0767511	3	-0.679937	0.0767812	-0.295502	0.076473	0.308069	FALSE	None
TSC1	3	1.13422	0.144693	3	1.02031	0.172143	0.122457	0.268253	0.583914	FALSE	None
TSC2	3	1.47542	0.0184232	3	1.27645	0.0314251	0.116852	0.226202	0.548435	FALSE	None
TSPYL2	3	-0.102718	0.0231553	3	0.0505864	0.0117727	0.162616	0.082922	0.323318	FALSE	None
EIPR1	3	-1.25304	0.0628594	3	-1.02451	0.0823985	0.245421	0.0457074	0.23905	TRUE	None
TTC4	3	-1.69997	0.199533	3	-1.27885	0.415757	0.42652	0.0070608	0.0990473	TRUE	None
TUB	3	-0.13545	0.0340447	3	-0.283689	0.141347	-0.128541	0.250292	0.566587	FALSE	None
TXNDC17	3	-0.485728	0.0264921	3	-0.558292	0.0827602	-0.0439036	0.718654	0.896286	FALSE	None
TYRO3	3	-0.259277	0.054648	3	-0.695643	0.345081	-0.398649	0.0119826	0.128749	TRUE	None
UBA5	3	-0.361797	0.0380224	3	-0.263124	0.0374487	0.134136	0.25062	0.566587	FALSE	None
UBE2C	3	-1.09055	0.154527	3	-1.77444	0.0104937	-0.69366	0.000186617	0.00785346	TRUE	None
UBE2G2	3	-0.708712	0.0309441	3	-0.574821	0.00196514	0.189612	0.133635	0.418503	FALSE	None
UBE2H	3	-0.441552	0.00120773	3	-0.595098	0.0883917	-0.112755	0.300715	0.624332	FALSE	None
UBE2I	3	-4.68213	2.40518	3	-3.74113	0.00403038	1.03788	0.0464706	0.23905	TRUE	Positive
UBE2J2	3	-0.590513	0.0316281	3	-0.49793	0.0941893	0.137877	0.283318	0.602097	FALSE	None
UBE2K	3	0.374508	0.0104994	3	0.236156	0.0324059	-0.109501	0.228571	0.55097	FALSE	None
UBE2T	3	-0.84296	0.0274974	3	-0.533601	0.0567515	0.351292	0.0113236	0.128001	TRUE	None
UBE2V2	3	-0.438723	0.0168549	3	-0.404116	0.0495722	0.0748319	0.392521	0.697787	FALSE	None
UCHL5	3	-0.805384	0.0836064	3	-0.731385	0.190948	0.107153	0.253906	0.567357	FALSE	None
UCK1	3	-0.190081	0.00181763	3	-0.266063	0.0070039	-0.0559516	0.499728	0.775308	FALSE	None
UFSP2	3	-0.198986	0.0310954	3	-0.334307	0.00298052	-0.0965347	0.390922	0.697787	FALSE	None
UGP2	3	-0.258644	0.0221332	3	-0.375825	0.00463412	-0.0565996	0.663683	0.86596	FALSE	None
UNG	3	-0.14478	0.0498401	3	-0.158509	0.0295667	-0.00108766	0.98916	0.993897	FALSE	None
UPF3A	3	-0.718643	0.197101	3	-0.634596	0.251043	0.112842	0.220552	0.542777	FALSE	None
UROS	3	-0.0600253	0.0337364	3	-0.0379082	0.00113139	0.0172316	0.872959	0.945477	FALSE	None
USP1	3	-0.702125	0.00135286	3	-0.733537	0.0147917	0.0125415	0.8952	0.948656	FALSE	None
USP10	3	-0.930265	0.0208393	3	-1.02296	0.0471867	-0.0591066	0.463646	0.744487	FALSE	None
USP14	3	0.196186	0.0550067	3	0.117039	0.00634245	-0.0744539	0.535475	0.802417	FALSE	None
USP15	3	-1.04873	3.84559	3	-0.84019	3.05688	0.194158	0.108152	0.383275	FALSE	None
USP2	3	-0.251676	0.0175325	3	-0.144064	0.0247391	0.132856	0.191426	0.506987	FALSE	None
USP28	3	-0.187026	0.00183732	3	-0.100009	0.0650547	0.0898533	0.401947	0.702205	FALSE	None
USP30	3	-0.243508	0.0300939	3	-0.19675	0.0553844	0.0894849	0.498255	0.775308	FALSE	None
USP33	3	-0.0687847	0.0107703	3	-0.310247	0.00291805	-0.215481	0.0534062	0.249564	TRUE	None
USP36	3	-1.59265	1.79954	3	-1.45693	1.12821	0.134226	0.270963	0.586022	FALSE	None
USP7	3	0.801176	0.0634009	3	0.436868	0.00367144	-0.248108	0.0620735	0.272584	TRUE	None
USP9X	3	-0.196978	0.024885	3	-0.146086	0.0129038	0.0748427	0.362582	0.678164	FALSE	None
UXS1	3	-0.111979	0.0210993	3	0.0410636	0.00030917	0.16312	0.124487	0.408219	FALSE	None
VAC14	3	-0.488283	0.00883814	3	-0.424335	0.0207351	0.09363	0.47155	0.752394	FALSE	None
VAMP2	3	-0.307899	0.123228	3	-0.390309	0.056995	-0.0562181	0.579762	0.824678	FALSE	None
VDAC1	3	-0.710982	0.105246	3	-0.362696	0.0980764	0.381125	0.0310882	0.198729	TRUE	None
VHL	3	-2.41626	0.0710415	3	-2.63421	0.0924144	-0.272027	0.135789	0.42199	FALSE	None
VIM	3	0.0236105	0.057875	3	-0.0241273	0.0339153	-0.0479261	0.659423	0.86596	FALSE	None
VKORC1L1	3	-0.157104	0.0276821	3	-0.363772	0.0768055	-0.157117	0.302572	0.624943	FALSE	None
VMP1	3	-3.18687	1.12308	3	-3.36323	1.37402	-0.132187	0.531996	0.801374	FALSE	None
VPS16	3	-0.825722	0.210433	3	-1.21391	0.350074	-0.357718	0.01129	0.128001	TRUE	None
VPS18	3	-0.862729	0.0314131	3	-1.6689	0.167765	-0.791168	0.00151056	0.0366473	TRUE	Negative
VPS45	3	-1.42083	0.00353241	3	-1.52036	0.161334	-0.0967587	0.566837	0.81593	FALSE	None
WDHD1	3	-2.71556	0.360752	3	-4.41935	7.65813	-1.59352	0.0064775	0.0934611	TRUE	Negative
WDR1	3	-2.35872	0.152776	3	-1.99613	0.220139	0.325948	0.0590141	0.265416	TRUE	None
WDR24	3	-1.84665	0.455622	3	-1.6988	0.430684	0.134424	0.331271	0.654762	FALSE	None
WDR33	3	-4.465	0.355702	3	-4.88943	0.238762	-0.234367	0.614735	0.839031	FALSE	None
WDR73	3	-2.98427	0.150205	3	-2.31435	0.507925	0.625946	0.0260544	0.191913	TRUE	None
WDR83OS	3	-0.0523642	0.00846977	3	-0.229052	0.078364	-0.156118	0.0764363	0.308069	FALSE	None
WEE1	3	-2.98312	2.16693	3	-3.16008	1.58815	-0.144615	0.561669	0.81273	FALSE	None
WIPF1	3	-0.612517	0.306773	3	-0.68288	0.222254	-0.0210952	0.829205	0.932878	FALSE	None
WNK3	3	-0.0955658	0.0220368	3	-0.188102	0.0598394	-0.0828718	0.510262	0.782773	FALSE	None
WRN	3	0.0149344	0.0267343	3	-0.0624552	0.0279124	-0.0684367	0.437579	0.724515	FALSE	None
WSB2	3	-0.407824	0.0157292	3	-0.252768	0.000949916	0.174055	0.135114	0.421189	FALSE	None
WT1	3	-0.128528	0.0892476	3	-0.255161	0.115209	-0.0999737	0.233598	0.55381	FALSE	None
WWP1	3	-0.291911	0.170834	3	-0.296661	0.249177	0.0107794	0.913736	0.950424	FALSE	None
XBP1	3	-0.518444	0.0173011	3	-0.288205	0.00495374	0.289784	0.0221742	0.170961	TRUE	None
XPA	3	-0.222465	0.0104135	3	-0.39076	0.135034	-0.12478	0.349474	0.665909	FALSE	None
XPC	3	-0.333426	0.0283297	3	-0.234634	0.0155409	0.134671	0.186685	0.501819	FALSE	None
XPNPEP3	3	-0.194176	0.039934	3	-0.0772784	0.0399428	0.121397	0.112503	0.387781	FALSE	None
XPOT	3	-1.0594	0.231024	3	-1.17217	0.144841	-0.0905384	0.435506	0.724515	FALSE	None
XRCC1	3	-0.421101	0.0216126	3	-0.213072	0.0173164	0.244115	0.0134496	0.134496	TRUE	None
XRCC2	3	-1.02717	1.03206	3	-0.922795	0.773937	0.094821	0.412958	0.711259	FALSE	None
XRCC3	3	-2.33512	2.7171	3	-2.09553	2.11511	0.247719	0.393562	0.697787	FALSE	None
XRCC4	3	-0.279747	0.0350808	3	-0.0724718	0.064795	0.23633	0.0239986	0.182498	TRUE	None
XRCC5	3	-3.46542	0.934839	3	-3.67207	0.635189	-0.111723	0.608623	0.833833	FALSE	None
XRCC6	3	-2.37139	2.42486	3	-2.00587	2.17443	0.377074	0.105895	0.379268	FALSE	None
ATP23	3	-0.36255	0.0758525	3	-0.368441	0.257943	0.0229008	0.851013	0.937144	FALSE	None
YBEY	3	-0.109032	0.00800633	3	-0.101335	0.0819238	0.0195209	0.852478	0.937144	FALSE	None
YPEL5	3	-1.00021	0.00118096	3	-1.33959	0.122268	-0.324708	0.0324406	0.204781	TRUE	None
YWHAQ	3	-0.0335389	0.00487395	3	0.156351	0.00464519	0.181509	0.106772	0.381059	FALSE	None
ZBTB11	3	-2.16999	1.63878	3	-1.8415	0.827165	0.326819	0.113752	0.387781	FALSE	None
ZBTB2	3	-1.21354	0.20455	3	-1.26041	0.306406	-0.0375119	0.778599	0.926929	FALSE	None
ZBTB45	3	-0.338613	0.182794	3	-0.327802	0.280948	0.036961	0.728159	0.903392	FALSE	None
ZBTB7A	3	1.18814	0.136022	3	0.67644	0.0330153	-0.315547	0.00194674	0.0436935	TRUE	None
ZDHHC5	3	-0.240679	0.00350875	3	-0.426137	0.0453495	-0.156293	0.1778	0.494706	FALSE	None
ZFP36L2	3	-0.668727	0.106304	3	-0.573879	0.0416772	0.139597	0.299055	0.622775	FALSE	None
RBSN	3	-2.33379	0.998772	3	-2.45781	2.61727	-0.118841	0.55894	0.812026	FALSE	None
ZMYND8	3	-1.01263	0.440164	3	-0.970122	0.587672	0.0508231	0.719892	0.896514	FALSE	None
ZNF217	3	0.0987684	0.0525586	3	0.0159353	0.000693551	-0.0871613	0.405521	0.704575	FALSE	None
ZNF281	3	-0.247556	0.0278344	3	-0.0863659	0.0154436	0.187032	0.0488457	0.239486	TRUE	None
ZNF512	3	-0.0558857	0.00453282	3	0.00739491	0.0211195	0.0714881	0.458004	0.740247	FALSE	None
ZNF689	3	-0.291242	0.00966345	3	-0.146779	0.00764686	0.16713	0.0670818	0.288309	TRUE	None
ZRSR2	3	-0.134203	0.0060181	3	-0.226258	0.00995322	-0.0603748	0.45729	0.740247	FALSE	None
ZSCAN2	3	-0.243822	0.0627134	3	-0.28533	0.125875	-0.0153585	0.869326	0.945289	FALSE	None
ZSWIM6	3	0.322617	0.0292507	3	0.316991	0.157393	0.0540164	0.610102	0.833833	FALSE	None

## Sheet: BTZ_T18
gene	n_T18_DMSO	mean_T18_DMSO	variance_T18_DMSO	n_T18_80	mean_T18_80	variance_T18_80	differential_T18_80_vs_T18_DMSO	pval_T18_80_vs_T18_DMSO	fdr_T18_80_vs_T18_DMSO	significant_T18_80_vs_T18_DMSO	effect_type_T18_80
A1BG	3	-0.476866	0.00556555	3	-0.455196	0.0778129	-0.016083	0.895019	0.9755	FALSE	None
ABCC1	3	0.305616	0.128501	3	0.233275	0.113467	-0.0268039	0.75486	0.924144	FALSE	None
ACACA	3	-1.62846	0.154074	3	-1.04323	0.079625	0.591859	0.000190115	0.00421076	TRUE	None
ACO2	3	-0.461217	0.0853112	3	-0.31891	0.106845	0.115601	0.498741	0.758626	FALSE	None
ACTB	3	1.63467	0.038432	3	0.507184	0.0703818	-0.838703	0.000136921	0.00415931	TRUE	Negative
ACTG1	3	0.927895	0.00695257	3	0.226115	0.0168394	-0.594694	0.000144135	0.00415931	TRUE	None
ACTR1A	3	-2.07738	0.450569	3	-3.10213	0.0064659	-1.06375	0.000214312	0.0043291	TRUE	Negative
ACTR1B	3	-1.50556	2.99163	3	-1.14759	1.26352	0.310619	0.247446	0.538913	FALSE	None
AGK	3	0.0373789	0.276116	3	0.105813	0.332704	0.105526	0.21701	0.51659	FALSE	None
AHCYL1	3	-0.498995	0.00946881	3	-0.649119	0.205326	-0.184079	0.170607	0.453456	FALSE	None
AKIRIN1	3	-0.839153	0.0432454	3	-1.16386	0.00283099	-0.332968	0.0189345	0.113833	TRUE	None
AKT1	3	-0.379069	0.0357557	3	-0.0785011	0.022412	0.257476	0.0261619	0.13968	TRUE	None
AKT3	3	-0.35453	0.0083626	3	-0.110336	0.015885	0.213928	0.079729	0.294968	TRUE	None
ALDH18A1	3	-0.230374	0.0183322	3	-0.215792	0.0321061	-0.00684498	0.950324	0.989529	FALSE	None
ALG12	3	-1.07929	0.0431306	3	-2.19222	0.06832	-1.09343	0.000722023	0.0104434	TRUE	Negative
ALG6	3	-1.85145	0.0323693	3	-1.84735	0.0585369	0.0138362	0.946821	0.989529	FALSE	None
ALG8	3	-2.49972	0.182339	3	-2.39207	0.197452	0.0862571	0.519755	0.777708	FALSE	None
ALG9	3	-1.07885	0.0817772	3	-2.32219	0.0191801	-1.22562	5.86133e-07	7.47205e-05	TRUE	Negative
ALK	3	-1.70439	8.39871	3	-1.74697	7.86393	0.0134891	0.969379	0.989529	FALSE	None
ALKBH1	3	-0.396307	0.0162228	3	-0.168058	0.0149637	0.195426	0.0886593	0.31553	FALSE	None
AMOT	3	-0.213032	0.0457223	3	-0.171753	0.0527235	0.0158148	0.903889	0.9755	FALSE	None
ANAPC5	3	-2.07099	2.11826	3	-2.06664	2.40997	-0.0256581	0.851772	0.96337	FALSE	None
ANKDD1A	3	-0.336445	0.00211513	3	-0.304639	0.0388295	-0.0102294	0.933082	0.983729	FALSE	None
ANKRD11	3	-1.3356	1.45114	3	-0.880788	0.559339	0.449548	0.0291921	0.149837	TRUE	None
ANP32B	3	0.182345	0.158262	3	0.222327	0.422102	0.0776247	0.538174	0.788258	FALSE	None
AP2S1	3	-0.562224	0.0129285	3	-1.72647	0.387021	-1.16458	0.000172949	0.00421076	TRUE	Negative
APC	3	0.717093	0.0220785	3	0.979038	0.0298054	0.469071	0.000123771	0.00415931	TRUE	None
APC2	3	-0.162761	0.0253648	3	-0.142822	0.0662095	-0.0159345	0.910037	0.9755	FALSE	None
APEX1	3	-0.478862	0.027606	3	-0.32314	0.0590218	0.128896	0.28916	0.578319	FALSE	None
ARF1	3	-2.55847	0.0319494	3	-2.09789	0.0044971	0.435666	0.0257088	0.139519	TRUE	None
ARF4	3	-4.6147	0.620475	3	-4.0924	0.39794	0.515932	0.335494	0.620056	FALSE	None
ARGLU1	3	-1.58865	0.759989	3	-1.31466	0.529481	0.268914	0.0887232	0.31553	FALSE	None
ARHGAP5	3	-1.24988	0.864602	3	-0.757042	0.576439	0.477024	0.012296	0.0853495	TRUE	None
ARID1A	3	-0.860283	0.112278	3	-0.277993	0.0444536	0.545999	0.000655565	0.00973707	TRUE	None
ARID1B	3	-0.766723	0.0142022	3	-0.748868	0.209611	-0.0202567	0.884689	0.971235	FALSE	None
ARID2	3	-1.23657	0.646321	3	-1.12241	0.367046	0.106941	0.596165	0.82462	FALSE	None
ARID3B	3	-0.199071	0.277609	3	-0.406805	0.179703	-0.240281	0.0251226	0.138655	TRUE	None
ASNS	3	-0.13683	0.138288	3	-0.0485533	0.0537155	0.0684754	0.513738	0.774441	FALSE	None
ATAD3A	3	-0.52446	0.0626198	3	-0.63998	0.0361709	-0.136394	0.329924	0.615939	FALSE	None
ATAD5	3	-1.4554	0.18735	3	-1.29651	0.442559	0.157986	0.256048	0.544703	FALSE	None
ATG9A	3	0.670497	0.124654	3	0.363058	0.0452263	-0.239442	0.0214749	0.123941	TRUE	None
ATM	3	-1.36351	0.0350756	3	-1.13117	0.0612196	0.23846	0.187624	0.474937	FALSE	None
ATP2B1	3	-0.241405	0.00114494	3	-0.483002	0.0514682	-0.271875	0.0270298	0.141451	TRUE	None
ATP2C1	3	-0.416534	0.0281408	3	-0.378175	0.0236023	0.00410526	0.967812	0.989529	FALSE	None
ATP9A	3	-0.328879	0.164761	3	-0.257134	0.0255379	0.0505758	0.717089	0.903173	FALSE	None
ATP9B	3	-0.0275464	0.0234746	3	-0.156068	0.010676	-0.148656	0.10679	0.353631	FALSE	None
ATR	3	-3.06088	1.26104	3	-2.64693	1.72635	0.421411	0.0458007	0.205594	TRUE	None
ATRIP	3	-1.54319	0.376588	3	-1.30859	0.0669566	0.231753	0.179347	0.458485	FALSE	None
ATRX	3	-2.58598	0.41387	3	-2.47316	0.572467	0.077164	0.742266	0.917357	FALSE	None
AUP1	3	-1.89148	2.44598	3	-1.68665	2.62226	0.202941	0.230692	0.529337	FALSE	None
B3GNT2	3	-0.904592	0.0177385	3	-0.776781	0.00655966	0.107224	0.417108	0.703304	FALSE	None
BABAM1	3	0.409333	0.00855914	3	0.178238	0.00179519	-0.242825	0.0300133	0.151941	TRUE	None
BAK1	3	-0.992765	0.100188	3	-0.797906	0.0370142	0.188732	0.0768853	0.287608	TRUE	None
BAP1	3	-3.38217	2.35126	3	-2.82359	0.393985	0.547997	0.114696	0.366832	FALSE	None
BARD1	3	-3.19945	1.22495	3	-3.03947	0.465867	0.122189	0.623123	0.845025	FALSE	None
BAX	3	-0.169105	0.0102726	3	0.0262297	0.00242361	0.172001	0.305638	0.596809	FALSE	None
BCL2	3	-0.21159	0.0183715	3	-0.0613347	0.00150752	0.127517	0.291184	0.581217	FALSE	None
BCL2L2	3	-0.126959	0.0386862	3	-0.00249767	0.01438	0.0799173	0.550613	0.793632	FALSE	None
BIRC6	3	-2.8417	0.384911	3	-2.64625	0.0963026	0.148555	0.441647	0.717144	FALSE	None
BLM	3	-0.73759	0.347673	3	-0.996828	0.328267	-0.265396	0.0191279	0.114315	TRUE	None
BMI1	3	0.144876	0.00481032	3	0.360725	0.0274636	0.196931	0.059098	0.242638	TRUE	None
BMPR1A	3	-0.0531954	0.0301696	3	0.0677977	0.0200624	0.107025	0.301584	0.592607	FALSE	None
BOLA3	3	-0.287626	0.101301	3	-0.403082	0.142206	-0.153715	0.228256	0.526343	FALSE	None
BPTF	3	-1.91146	0.0322575	3	-1.77935	0.00726624	0.146472	0.242831	0.535501	FALSE	None
BRAF	3	-0.695443	0.039825	3	-0.913379	0.000632858	-0.239751	0.107924	0.353908	FALSE	None
BRCA1	3	-2.52275	0.74729	3	-2.39122	0.923513	0.103772	0.433041	0.713608	FALSE	None
BRCA2	3	-1.35824	0.569063	3	-1.26471	0.192615	0.0903548	0.649105	0.856989	FALSE	None
BRD1	3	0.883575	0.0268682	3	0.850536	0.08184	0.185645	0.234678	0.530202	FALSE	None
BRD4	3	-1.30016	0.0428248	3	-1.37961	0.159657	-0.0807975	0.665256	0.864747	FALSE	None
BRD7	3	-1.34295	0.0811496	3	-0.870597	0.0327452	0.458024	0.0106902	0.0765749	TRUE	None
BRINP3	3	-0.0830343	0.00279288	3	-0.0624266	0.0272957	-0.0115738	0.914401	0.9755	FALSE	None
BRIP1	3	-1.30603	0.0761075	3	-0.838399	0.137455	0.453945	0.0013719	0.0164954	TRUE	None
BRMS1	3	0.0792205	0.0226749	3	0.113322	0.0202548	0.00643766	0.938098	0.986958	FALSE	None
BRPF1	3	-0.694509	0.094656	3	-0.757218	0.211284	-0.0864804	0.631916	0.849847	FALSE	None
EMSY	3	-0.689296	0.37941	3	-0.610295	0.209603	0.058495	0.650011	0.857064	FALSE	None
MTRFR	3	-0.246145	0.110025	3	-0.225331	0.0779203	-0.00427409	0.964407	0.989529	FALSE	None
C19orf53	3	-2.07306	0.260583	3	-1.70607	0.163228	0.363788	0.0700627	0.274276	TRUE	None
C1orf115	3	0.0847282	0.0625112	3	-0.0472563	0.0844596	-0.15286	0.316764	0.607317	FALSE	None
C22orf39	3	-0.309943	0.0193916	3	-0.257816	0.0203539	0.0238655	0.865135	0.967703	FALSE	None
C6orf136	3	-0.0330744	0.0311256	3	-0.251682	0.0103457	-0.254165	0.0344471	0.168075	TRUE	None
C7orf26	3	-2.30475	0.106622	3	-1.54319	0.118584	0.764222	0.000385358	0.00648687	TRUE	Positive
FMC1-LUC7L2	3	-0.282153	0.0164062	3	-0.810051	0.0158643	-0.557579	0.00045907	0.00760099	TRUE	None
PAXX	3	0.0501474	0.075959	3	-0.0281763	0.0414394	-0.0956164	0.405904	0.690174	FALSE	None
CAB39	3	1.15578	0.146595	3	0.432354	0.144132	-0.543307	0.000166968	0.00421076	TRUE	None
CABIN1	3	-0.993386	0.0295887	3	-2.36594	0.41169	-1.37905	7.96938e-05	0.0034996	TRUE	Negative
CAP1	3	-0.237843	0.0233302	3	-0.523246	0.0774275	-0.317449	0.0411116	0.18874	TRUE	None
CBS	3	-0.0713338	0.0483109	3	-0.0594428	0.0788429	-0.0151242	0.891847	0.974463	FALSE	None
CCAR2	3	-1.08178	0.628938	3	-1.0205	0.335214	0.0587524	0.732057	0.911686	FALSE	None
SGF29	3	-1.45237	0.387132	3	-0.873329	0.0658521	0.576368	0.00126632	0.0161896	TRUE	None
CCDC51	3	-0.259488	0.139071	3	-0.242209	0.0618173	-0.0201814	0.865184	0.967703	FALSE	None
CCNA2	3	-4.86104	5.48119	3	-4.99109	2.35833	0.243256	0.552379	0.794733	FALSE	None
CCNC	3	0.436289	0.0238233	3	-1.04515	0.201689	-1.50649	5.30212e-07	7.47205e-05	TRUE	Negative
CCND1	3	-4.25966	3.00698	3	-3.6265	3.9239	0.706815	0.104573	0.349732	FALSE	None
CCND3	3	-0.335196	0.00713396	3	-0.656603	0.0565943	-0.339725	0.0198369	0.116484	TRUE	None
CCNE1	3	0.0458377	0.0753879	3	-0.0391736	0.0352261	-0.111155	0.354928	0.638997	FALSE	None
CCNO	3	-0.255992	0.085889	3	-0.326881	0.1197	-0.0992313	0.388521	0.673035	FALSE	None
CCS	3	-0.309707	0.0734322	3	-0.188414	0.135262	0.0888092	0.562893	0.802498	FALSE	None
CD44	3	-0.615496	0.37314	3	-0.535077	0.345284	0.0573022	0.711372	0.903173	FALSE	None
CD46	3	-0.13968	0.000133673	3	-0.24986	0.0102432	-0.134868	0.152068	0.425664	FALSE	None
CD55	3	-0.177084	0.00713566	3	-0.15364	0.0601079	-0.00395961	0.974684	0.989529	FALSE	None
CD59	3	-0.264692	0.0154866	3	-0.0783887	0.000861168	0.160133	0.197779	0.491683	FALSE	None
CDC25A	3	-0.0767906	0.0680379	3	-0.482187	0.165507	-0.436992	0.018634	0.112697	TRUE	None
CDC40	3	-3.18537	0.130898	3	-2.71181	0.036007	0.403569	0.0269095	0.141451	TRUE	None
CDC42	3	-2.90973	8.61232	3	-3.24183	4.93818	-0.38046	0.143494	0.417662	FALSE	None
CDC45	3	-3.87973	3.08832	3	-3.50947	2.66989	0.434347	0.151828	0.425664	FALSE	None
CDK11A	3	-2.00346	0.026968	3	-2.37356	1.13042	-0.364837	0.397142	0.680254	FALSE	None
CDK13	3	1.13266	0.0543099	3	0.460607	0.0237842	-0.487998	0.00135067	0.0164359	TRUE	None
CDK4	3	-3.61048	0.465518	3	-3.58749	0.264406	-0.0561839	0.822325	0.954443	FALSE	None
CDK5	3	-0.447995	0.158728	3	-0.0849689	0.0612281	0.33	0.00835374	0.0632015	TRUE	None
CDK6	3	-1.30127	0.0209299	3	-1.25099	0.0641941	0.0405312	0.81471	0.950182	FALSE	None
CDKN1B	3	1.08475	0.0045847	3	1.04946	0.0275309	0.26123	0.0180829	0.110689	TRUE	None
CDKN2A	3	0.348889	0.0336291	3	0.39572	0.0693935	0.0944297	0.400975	0.682942	FALSE	None
CDKN2B	3	0.295671	0.105587	3	0.42801	0.0820104	0.160519	0.228241	0.526343	FALSE	None
CDS2	3	-3.08533	1.66295	3	-2.92233	3.22487	0.147576	0.594647	0.82462	FALSE	None
CDX2	3	-0.0138359	0.050062	3	0.0369944	0.0585739	0.0142764	0.872235	0.968491	FALSE	None
CELF1	3	-0.703475	0.0581939	3	-0.597359	0.17884	0.0838462	0.466447	0.732563	FALSE	None
CELSR2	3	-0.276048	0.0476023	3	-0.349541	0.0210054	-0.105283	0.262873	0.551326	FALSE	None
CHD1L	3	-0.11726	0.00518794	3	-0.157074	0.0424355	-0.0821864	0.524398	0.781183	FALSE	None
CHD2	3	-0.27522	0.11299	3	-0.00927509	0.178305	0.238	0.0205627	0.120048	TRUE	None
CHD4	3	-1.74479	0.440319	3	-1.70362	0.715066	0.0268754	0.830868	0.955783	FALSE	None
CHD8	3	0.328604	0.00970078	3	-1.01759	0.00470112	-1.3785	5.91845e-07	7.47205e-05	TRUE	Negative
CHEK1	3	-4.20464	10.705	3	-3.47871	6.35301	0.836099	0.0692244	0.272109	TRUE	Positive
CHEK2	3	-0.502394	0.128382	3	-0.573641	0.425897	-0.102425	0.413198	0.69874	FALSE	None
CHMP5	3	-2.60864	0.0953473	3	-2.68095	0.00705736	-0.109281	0.564927	0.802498	FALSE	None
CHTF18	3	-0.861076	0.218558	3	-1.16504	0.492234	-0.321356	0.0535481	0.229168	TRUE	None
CIT	3	-0.915677	0.0235203	3	-0.801848	0.0178812	0.0968624	0.484348	0.749144	FALSE	None
CLPP	3	-0.419638	0.161112	3	-0.370108	0.141114	0.0216963	0.851246	0.96337	FALSE	None
CLPX	3	-0.231156	0.0225425	3	-0.305333	0.0627237	-0.100506	0.317739	0.607317	FALSE	None
CLSPN	3	-0.908246	0.0590468	3	-0.745683	0.0246509	0.141755	0.121538	0.381221	FALSE	None
COIL	3	-1.01356	0.0137038	3	-0.432178	0.138861	0.554785	0.00656922	0.0535073	TRUE	None
COMMD8	3	-1.37804	0.471333	3	-1.09574	0.209039	0.271153	0.119433	0.378142	FALSE	None
COQ2	3	-0.583417	0.0739553	3	-0.256962	0.118626	0.281813	0.00595239	0.0500993	TRUE	None
COQ7	3	-0.36684	0.00801623	3	-0.153959	0.01853	0.183035	0.226531	0.524762	FALSE	None
COX5A	3	-0.893564	0.404296	3	-1.21397	0.266389	-0.314114	0.0323616	0.160143	TRUE	None
CPD	3	-0.346365	0.0913187	3	-0.335592	0.10507	-0.0254232	0.807983	0.946488	FALSE	None
CPOX	3	-0.532424	0.0708079	3	-0.484945	0.0481085	0.00882453	0.936258	0.986049	FALSE	None
CRABP2	3	0.026379	0.0102402	3	0.0543887	0.00935137	-0.0101196	0.899673	0.9755	FALSE	None
CRAMP1	3	-0.0616317	2.9499e-05	3	-0.231774	0.0152824	-0.197529	0.0792111	0.29413	TRUE	None
CREBBP	3	-0.36243	0.685295	3	0.229739	0.417894	0.585518	0.00708137	0.0572174	TRUE	None
CS	3	-0.602665	0.00514184	3	-0.587991	0.0568783	-0.016839	0.886759	0.971395	FALSE	None
CSK	3	-1.04857	0.218822	3	-1.35041	0.243397	-0.316669	0.152617	0.425664	FALSE	None
CSNK2A2	3	-0.81074	0.0687953	3	-0.653132	0.0802697	0.13201	0.300366	0.592528	FALSE	None
CTDNEP1	3	-2.6008	1.26265	3	-2.66584	1.43916	-0.105907	0.668446	0.866983	FALSE	None
CTNNA1	3	-0.140561	0.0318031	3	-0.126333	0.15436	-0.0133843	0.90755	0.9755	FALSE	None
CTNNB1	3	-0.518447	0.511797	3	-0.674545	0.926239	-0.175177	0.196203	0.491683	FALSE	None
CUL4A	3	-0.143526	0.0186239	3	0.0346538	0.00663403	0.134495	0.249341	0.538913	FALSE	None
CUL5	3	2.31918	0.016742	3	1.82359	0.0346386	0.146894	0.151529	0.425664	FALSE	None
TASL	3	-0.0945071	0.0808995	3	-0.248554	0.0138557	-0.193645	0.102752	0.345933	FALSE	None
CFAP47	3	-0.179409	0.0208485	3	0.0257147	0.0390763	0.181809	0.0762007	0.287608	TRUE	None
BCLAF3	3	0.00326929	0.00870138	3	0.201769	0.0270752	0.15165	0.127937	0.389205	FALSE	None
LINC01560	3	0.0111451	0.0116775	3	0.0223955	0.00291464	-0.0237028	0.809955	0.946488	FALSE	None
H2AP	3	-0.0482973	0.00898143	3	-0.066728	0.124983	-0.0387383	0.788696	0.943818	FALSE	None
LINC01545	3	-0.216676	0.00222486	3	-0.0730006	0.00391634	0.122046	0.18541	0.470514	FALSE	None
DIPK2B	3	-0.0380147	0.0087119	3	0.0101374	0.0158632	0.0118672	0.906344	0.9755	FALSE	None
CXXC1	3	0.567316	0.0774081	3	-0.585239	0.0401127	-1.17537	1.7717e-06	0.000162674	TRUE	Negative
CYB5B	3	-1.02729	0.291914	3	-0.790289	0.226477	0.228588	0.130035	0.391913	FALSE	None
CYB5R4	3	-1.03776	0.366209	3	-0.244879	0.0300077	0.772291	0.00219042	0.0235354	TRUE	Positive
DAPK3	3	0.453727	0.00269202	3	0.316056	0.00838473	-0.105408	0.19731	0.491683	FALSE	None
DAXX	3	-0.572082	0.163678	3	-1.39704	0.210081	-0.860281	0.00499239	0.0434947	TRUE	Negative
DAZAP1	3	0.115643	0.636585	3	-0.423645	0.982013	-0.524461	0.00131627	0.0164128	TRUE	None
DBF4	3	-1.60938	0.164308	3	-1.11081	0.0686684	0.49075	0.0175757	0.108905	TRUE	None
DCLRE1A	3	-0.0717007	0.00194324	3	0.0436045	0.0187349	0.0776901	0.477381	0.741777	FALSE	None
DCLRE1B	3	-1.56836	0.0373099	3	-1.74473	0.014449	-0.1733	0.16897	0.451482	FALSE	None
DCLRE1C	3	-0.41679	0.0108615	3	-0.285956	0.0670958	0.0994137	0.436615	0.713608	FALSE	None
DCTN1	3	-1.59869	0.790148	3	-1.5806	1.06776	0.00519763	0.968683	0.989529	FALSE	None
DCTN3	3	-2.7377	0.668141	3	-2.9802	2.02787	-0.265592	0.365349	0.649339	FALSE	None
DDB1	3	-2.30903	0.752654	3	-2.28541	1.27492	-0.0143592	0.948336	0.989529	FALSE	None
DDB2	3	-0.30416	0.00199594	3	-0.139299	0.0164717	0.137255	0.150517	0.425664	FALSE	None
DDI2	3	-0.9172	0.0118641	3	-4.65503	1.79047	-3.7771	5.90171e-07	7.47205e-05	TRUE	Negative
DDX5	3	-0.673553	0.0125417	3	-0.262115	0.0663531	0.387005	0.00569229	0.0487221	TRUE	None
DET1	3	-0.729975	0.175959	3	-0.797845	0.00973501	-0.0978599	0.52823	0.784577	FALSE	None
DHX29	3	-0.476178	0.0135457	3	0.594365	0.0624217	1.03878	2.44999e-07	6.18623e-05	TRUE	Positive
DHX35	3	-2.2354	0.103263	3	-1.29776	0.292355	0.938178	0.000140395	0.00415931	TRUE	Positive
DIAPH1	3	-0.432903	0.0901164	3	-0.48155	0.0507793	-0.0896646	0.427154	0.71075	FALSE	None
DIS3L	3	-0.718747	0.0359794	3	-0.730155	0.195236	-0.0379154	0.793328	0.944883	FALSE	None
DNA2	3	-2.6899	1.48016	3	-3.23763	2.55027	-0.508919	0.0142285	0.0933165	TRUE	None
DNAJB5	3	-0.29508	0.00538986	3	-0.165409	0.0198503	0.102718	0.237458	0.530602	FALSE	None
DNMT3A	3	-0.0766784	0.00655883	3	-0.114204	0.0295407	-0.0861194	0.43454	0.713608	FALSE	None
DOCK2	3	-0.0139929	0.0147729	3	0.028586	0.00328167	0.00344998	0.971918	0.989529	FALSE	None
DOT1L	3	0.277835	0.00949085	3	-0.58483	0.0181313	-0.908974	3.70067e-05	0.00199523	TRUE	Negative
DPF2	3	-1.24823	0.0924412	3	-0.898661	0.0705804	0.325521	0.00760115	0.0604501	TRUE	None
DPM2	3	-1.1046	0.51911	3	-1.30774	0.844455	-0.214843	0.123435	0.383598	FALSE	None
DVL3	3	-0.379279	0.0371203	3	-0.131634	0.00289767	0.226985	0.0759603	0.287608	TRUE	None
DYRK1A	3	1.721	1.08368	3	1.76324	0.651005	0.554467	0.023744	0.135489	TRUE	None
E2F3	3	-1.07966	0.00568642	3	-1.22229	0.210368	-0.156198	0.44439	0.719284	FALSE	None
E2F7	3	-0.0192801	0.110651	3	-1.72225	0.0922735	-1.70948	1.39969e-06	0.000141369	TRUE	Negative
ECSIT	3	-0.15898	0.209873	3	-0.15247	0.153732	-0.0180217	0.865032	0.967703	FALSE	None
EDC3	3	-1.0591	0.27237	3	-1.17003	0.0535181	-0.103226	0.497673	0.758626	FALSE	None
EDF1	3	-0.409296	0.194879	3	-0.486472	0.196674	-0.0983445	0.391393	0.673995	FALSE	None
EED	3	-0.154537	0.221268	3	-0.295664	0.194871	-0.153743	0.20543	0.497245	FALSE	None
EEFSEC	3	-4.19713	0.938188	3	-4.31588	5.16132	-0.0120694	0.978495	0.989529	FALSE	None
EGFR	3	-0.0347508	0.0608993	3	0.0384152	0.0850589	0.0454507	0.664703	0.864747	FALSE	None
EHMT2	3	-0.993028	0.0767603	3	-0.801338	0.00459105	0.168356	0.209808	0.502185	FALSE	None
EIF2AK4	3	0.410183	0.0669512	3	0.333249	0.0331875	-0.0612861	0.476476	0.741777	FALSE	None
EIF2S1	3	-4.21299	0.105044	3	-4.21543	1.09494	0.000331162	0.999112	0.999112	FALSE	None
EIF3I	3	-3.8974	0.0303305	3	-3.8385	0.883785	0.13598	0.717703	0.903173	FALSE	None
EIF4A1	3	-4.10148	0.816987	3	-3.92622	1.14634	0.181783	0.664499	0.864747	FALSE	None
EIF4B	3	-1.56967	1.51432	3	-1.59413	1.43766	-0.0388363	0.827738	0.955783	FALSE	None
EIF4ENIF1	3	-2.30894	0.183106	3	-2.34062	0.00630834	-0.0479679	0.83843	0.956852	FALSE	None
EIF4G1	3	-2.06101	1.02005	3	-1.43181	0.444129	0.618313	0.00814858	0.0632015	TRUE	None
EIF4H	3	-1.07217	0.124081	3	-0.486061	0.147835	0.56439	0.000143579	0.00415931	TRUE	None
ELAVL1	3	-1.55595	0.308873	3	-1.34239	0.294829	0.216459	0.0510796	0.223335	TRUE	None
ELF2	3	-0.902826	0.039076	3	-0.832731	0.118451	0.0400905	0.83665	0.956266	FALSE	None
ELMO1	3	-0.267915	0.0692943	3	-0.149931	0.0635763	0.0868971	0.335812	0.620056	FALSE	None
EME1	3	-0.448085	0.0371294	3	-0.3727	0.0347211	0.0479251	0.579703	0.813194	FALSE	None
EP300	3	1.42922	0.0687662	3	1.53521	0.0992036	0.541766	9.69096e-05	0.00393285	TRUE	None
EPC2	3	-1.33945	0.391171	3	-1.2105	0.299042	0.136171	0.329704	0.615939	FALSE	None
EPHA7	3	0.0802799	0.0129354	3	0.0366484	0.000744156	-0.0724607	0.491845	0.757261	FALSE	None
ERBB2	3	-0.142597	0.0475896	3	-0.191589	0.039584	-0.0720294	0.578923	0.813194	FALSE	None
ERBB3	3	0.0458963	0.0194406	3	-0.124005	0.061963	-0.206165	0.118768	0.37722	FALSE	None
ERCC1	3	-1.24331	0.622117	3	-0.740373	0.47319	0.486357	0.00819752	0.0632015	TRUE	None
ERCC2	3	-4.21841	0.168364	3	-4.26765	0.314915	0.0727123	0.804884	0.946488	FALSE	None
ERCC4	3	-1.27407	0.443325	3	-1.00576	0.158365	0.261885	0.081743	0.299132	TRUE	None
ERCC6	3	-0.257046	0.0476071	3	-0.147249	0.0373621	0.0881875	0.367715	0.649339	FALSE	None
ERCC8	3	0.00244755	0.072089	3	-0.197414	0.0581794	-0.203519	0.0292257	0.149837	TRUE	None
ERG	3	-0.094576	0.0188667	3	0.108635	0.00275075	0.170596	0.115028	0.366832	FALSE	None
ETFA	3	-0.0343507	0.0228501	3	-0.198134	0.0419271	-0.19274	0.0551021	0.232426	TRUE	None
ETV1	3	-0.306881	0.0581148	3	-0.211885	0.067945	0.0681096	0.496415	0.758515	FALSE	None
EXO1	3	-0.24886	0.0067664	3	-0.111118	0.0368373	0.100062	0.347848	0.630748	FALSE	None
EXT1	3	1.20933	0.00444969	3	0.692413	0.052218	-0.255194	0.0479791	0.211611	TRUE	None
EXT2	3	0.845987	0.111376	3	0.47235	0.181365	-0.234516	0.0767966	0.287608	TRUE	None
EXTL3	3	0.922283	0.00257765	3	0.60268	0.00495332	-0.137835	0.0976301	0.335396	FALSE	None
EZH2	3	0.194505	0.0310533	3	0.112235	0.0194259	-0.0702911	0.626997	0.847746	FALSE	None
F2R	3	-0.536285	0.00140581	3	-0.26664	0.0759933	0.236884	0.0353333	0.169131	TRUE	None
FAM111A	3	-0.127515	0.129302	3	-0.0836884	0.078693	0.0222603	0.857036	0.96667	FALSE	None
FAM111B	3	-0.045199	0.0434205	3	0.0189155	0.106949	0.0510126	0.63951	0.850994	FALSE	None
FAM136A	3	-0.586071	0.0748304	3	-0.459494	0.0705529	0.0895149	0.48146	0.746965	FALSE	None
ABRAXAS1	3	-0.658747	0.0236422	3	-0.382617	0.102604	0.243105	0.12715	0.387979	FALSE	None
SHLD2	3	-1.2386	0.126653	3	-1.08396	0.108683	0.145909	0.307088	0.597608	FALSE	None
TENT5C	3	-0.00937304	0.0340602	3	0.10079	0.0316808	0.075879	0.424014	0.70903	FALSE	None
SINHCAF	3	-1.56248	0.694196	3	-1.8052	0.956393	-0.257629	0.0449579	0.202712	TRUE	None
FAN1	3	-0.353479	0.00426186	3	-0.40495	0.0103934	-0.0891225	0.459902	0.732563	FALSE	None
FANCA	3	-0.829535	0.03422	3	-0.743181	0.0655222	0.0670938	0.534136	0.785534	FALSE	None
FANCB	3	-0.718298	0.18033	3	-0.63529	0.0505103	0.0501945	0.648252	0.856989	FALSE	None
FANCC	3	-1.18357	0.195569	3	-0.902776	0.00291263	0.275682	0.0924245	0.324128	FALSE	None
FANCD2	3	-1.30288	0.0141635	3	-1.27384	0.0283801	0.0124369	0.920447	0.9755	FALSE	None
FANCD2OS	3	0.00117159	0.0162853	3	0.00967821	0.0527215	-0.0217241	0.833499	0.956208	FALSE	None
FANCE	3	-0.899342	0.0332676	3	-0.753219	0.0635743	0.119963	0.288265	0.577674	FALSE	None
FANCF	3	-0.906177	0.0382651	3	-0.862038	0.0647251	0.0204723	0.874445	0.968491	FALSE	None
FANCG	3	-1.28331	0.454047	3	-0.784071	0.496264	0.488614	0.00627504	0.0519491	TRUE	None
FANCI	3	-1.16631	0.00886119	3	-1.02655	0.0365319	0.122182	0.244484	0.536802	FALSE	None
FANCL	3	-0.959289	0.0302589	3	-0.525682	0.0299129	0.40541	0.000979508	0.0130171	TRUE	None
FANCM	3	-0.728933	0.414357	3	-0.715116	0.364067	0.00273879	0.976285	0.989529	FALSE	None
FASN	3	-1.01484	0.0564469	3	-0.747599	0.0100926	0.244273	0.0349509	0.168902	TRUE	None
FASTKD1	3	-0.0223722	0.00448163	3	-0.112148	0.0197726	-0.125823	0.263516	0.551326	FALSE	None
FBRSL1	3	-0.779619	0.431992	3	-0.651891	0.554551	0.114615	0.340308	0.62268	FALSE	None
FBXW7	3	1.08863	0.094957	3	0.584093	0.0276802	-0.299621	0.00293545	0.0290667	TRUE	None
FDX1	3	-0.626376	0.13416	3	-0.549623	0.0431982	0.0467637	0.714911	0.903173	FALSE	None
FDX2	3	-3.3248	1.16989	3	-3.28736	0.882046	-0.00943176	0.977041	0.989529	FALSE	None
FECH	3	-0.28997	0.132903	3	-0.45111	0.217763	-0.180598	0.190354	0.479445	FALSE	None
FEM1B	3	-0.308892	0.0794196	3	-0.144433	0.0431651	0.121214	0.256172	0.544703	FALSE	None
FEN1	3	-3.80883	0.00435615	3	-3.05522	0.351286	0.670105	0.00431983	0.0393066	TRUE	None
FGFR1	3	-0.214974	0.0160403	3	-0.334109	0.00833467	-0.151637	0.146541	0.421653	FALSE	None
FGFR2	3	-0.0643888	0.00275226	3	-0.0558221	0.0391309	-0.0112359	0.91728	0.9755	FALSE	None
FGFR3	3	0.309749	0.0033451	3	0.132075	0.113157	-0.184768	0.126493	0.387313	FALSE	None
FGFR4	3	-0.287741	0.00026662	3	-0.172918	0.0671797	0.0831601	0.614668	0.839636	FALSE	None
FH	3	-0.049931	0.00598734	3	-0.136807	0.0205318	-0.0994166	0.368415	0.649339	FALSE	None
FIBP	3	-0.235868	0.131558	3	0.00190315	0.120316	0.229984	0.0647018	0.259321	TRUE	None
FLCN	3	-0.391389	0.051089	3	-1.55473	0.0129627	-1.1781	4.57073e-06	0.000331229	TRUE	Negative
FLNB	3	-0.325792	0.0614369	3	-0.310258	0.0032188	-0.0160456	0.905205	0.9755	FALSE	None
FOSL1	3	-1.94825	4.51537	3	-2.4277	5.40722	-0.469121	0.0256301	0.139519	TRUE	None
FOXA1	3	-0.428567	0.00788528	3	-0.172297	0.0357238	0.227015	0.139282	0.411331	FALSE	None
FOXK1	3	-0.648398	0.0908365	3	-0.684888	0.0109715	-0.0707409	0.623577	0.845025	FALSE	None
FOXM1	3	-1.84983	0.930722	3	-1.79761	1.24666	0.0256558	0.897016	0.9755	FALSE	None
FPGS	3	-0.114918	0.0478488	3	0.113726	0.0425888	0.180627	0.10173	0.343635	FALSE	None
MRM2	3	-0.556712	0.0585299	3	-0.480737	0.00182423	0.0447009	0.694989	0.891192	FALSE	None
FURIN	3	-1.00034	0.34901	3	-0.906706	0.0359039	0.0808939	0.582821	0.816434	FALSE	None
FZD1	3	-0.134601	0.0474297	3	-0.0781188	0.0391105	0.0341529	0.753686	0.924144	FALSE	None
FZD10	3	-0.230764	0.103308	3	-0.0555075	0.143621	0.141111	0.207095	0.499203	FALSE	None
FZD2	3	-0.302893	0.0893655	3	-0.138809	0.0292798	0.139139	0.113554	0.366003	FALSE	None
FZD3	3	0.0271929	0.0344291	3	0.118435	0.0307526	0.067528	0.430797	0.713287	FALSE	None
FZD4	3	-0.14556	0.0849022	3	-0.0898473	0.0995355	0.0225354	0.828359	0.955783	FALSE	None
FZD5	3	-0.110724	0.0217813	3	0.029629	0.0595035	0.116629	0.209824	0.502185	FALSE	None
FZD6	3	0.0296518	0.0057439	3	0.054293	0.00657778	0.00931327	0.927176	0.979548	FALSE	None
FZD7	3	-0.121575	0.0264821	3	-0.0705373	4.86452e-05	0.0381233	0.689054	0.887684	FALSE	None
FZD8	3	-0.292308	0.0384305	3	-0.078735	0.024167	0.188254	0.107691	0.353908	FALSE	None
FZD9	3	-0.281961	8.71973e-05	3	-0.0109889	0.00380697	0.237199	0.0243663	0.136722	TRUE	None
G6PD	3	-1.03522	0.138404	3	-1.2752	0.220561	-0.249676	0.0895097	0.316101	FALSE	None
GANAB	3	-1.24727	0.168994	3	-0.803001	0.116365	0.452849	0.000372132	0.00647119	TRUE	None
GATA3	3	-0.175405	0.0973726	3	-0.00477057	0.0386055	0.139422	0.272891	0.564796	FALSE	None
GATAD1	3	-0.631813	0.397695	3	-0.592281	0.230331	0.0114103	0.899045	0.9755	FALSE	None
GCLC	3	-0.193288	0.00457805	3	-0.31549	0.00150448	-0.153977	0.156844	0.432821	FALSE	None
GCLM	3	-0.160225	0.0280598	3	-0.0846917	0.0364251	0.0373278	0.768303	0.931556	FALSE	None
GCN1	3	-1.4801	0.360655	3	-0.99497	0.0569802	0.48196	0.1107	0.360627	FALSE	None
GCSH	3	-0.984793	0.110438	3	-0.927353	0.28116	0.0463052	0.702124	0.897136	FALSE	None
GEMIN6	3	-1.507	1.41325	3	-1.27772	0.865982	0.21175	0.203571	0.497245	FALSE	None
GEN1	3	-0.29955	0.0481624	3	-0.418561	0.0308523	-0.152341	0.115134	0.366832	FALSE	None
GGNBP2	3	-2.03016	0.305662	3	-0.950048	0.284449	1.07747	1.67891e-07	6.18623e-05	TRUE	Positive
GHDC	3	-0.638388	0.0713949	3	-0.472927	0.00517637	0.132595	0.220042	0.519257	FALSE	None
GID8	3	-1.00073	0.148666	3	-1.13821	0.141612	-0.144038	0.119838	0.37824	FALSE	None
GJC1	3	-0.297225	0.144902	3	-0.168113	0.134947	0.110699	0.257989	0.546266	FALSE	None
GLS	3	-0.090261	0.0398558	3	-0.0912382	0.0138504	-0.0249909	0.83697	0.956266	FALSE	None
GNA13	3	-0.765385	0.0529223	3	-0.283436	0.0589839	0.45575	0.000141267	0.00415931	TRUE	None
GNL2	3	-3.06944	2.95177	3	-2.96062	3.32823	0.106453	0.680528	0.880068	FALSE	None
GNPTG	3	-0.0468133	0.000737859	3	0.0228874	0.0238801	0.0359442	0.737134	0.91575	FALSE	None
GOT1	3	-0.468179	0.0782385	3	-0.440432	0.0903295	0.00441097	0.973366	0.989529	FALSE	None
GOT2	3	-0.771494	0.0328472	3	-0.764324	0.00601619	-0.0178179	0.848602	0.96302	FALSE	None
GPX4	3	-4.11793	0.0110675	3	-3.55172	0.629791	0.49607	0.143035	0.41753	FALSE	None
GRHL2	3	-0.142959	0.00922431	3	-0.0499679	0.00202335	0.0583078	0.538513	0.788258	FALSE	None
GRK6	3	0.122904	0.206246	3	0.14892	0.118198	0.026652	0.795969	0.945798	FALSE	None
GRSF1	3	-0.482118	0.0398876	3	-0.34408	0.0702782	0.100772	0.464329	0.732563	FALSE	None
GSK3B	3	0.368747	0.0268851	3	0.819482	0.00137485	0.568481	3.8373e-05	0.00199523	TRUE	None
GSPT1	3	-1.45582	0.762167	3	-1.43241	1.39618	0.0153973	0.919782	0.9755	FALSE	None
GSS	3	-0.188955	0.0345926	3	-0.14064	0.0440705	0.0148446	0.882626	0.971235	FALSE	None
GSTP1	3	-0.162924	0.106931	3	0.0468817	0.0408022	0.19721	0.0835173	0.302339	FALSE	None
GTPBP3	3	-0.334902	0.0670958	3	-0.116297	0.00538003	0.185888	0.0854663	0.308289	FALSE	None
HADHA	3	-0.549124	0.0225635	3	-0.544765	0.0722069	-0.030768	0.822003	0.954443	FALSE	None
HAX1	3	-0.0789365	0.119607	3	-0.166132	0.0547025	-0.104625	0.281411	0.574192	FALSE	None
HCN1	3	-0.178193	0.0684696	3	0.0785458	0.0195151	0.226958	0.0418415	0.191221	TRUE	None
HDAC2	3	0.0474073	0.00711427	3	-0.141036	0.0322514	-0.226893	0.0468609	0.209423	TRUE	None
HDAC3	3	-3.77122	0.0374981	3	-3.74898	0.492199	0.0199472	0.952274	0.989529	FALSE	None
HEATR3	3	-1.34603	0.826168	3	-1.24666	0.401379	0.0818719	0.597645	0.82462	FALSE	None
HECTD1	3	-2.1414	0.1789	3	-2.98702	0.0476394	-0.891447	0.00782258	0.061725	TRUE	Negative
HEXIM1	3	0.368742	0.0228886	3	0.374179	0.0111862	0.0499575	0.656172	0.859666	FALSE	None
HIGD2A	3	-0.628543	0.0862266	3	-0.444033	0.146906	0.156464	0.203822	0.497245	FALSE	None
H1-2	3	-0.158396	0.225651	3	-0.43475	0.173985	-0.279665	0.0104233	0.0751964	TRUE	None
HK2	3	-0.869995	0.0525621	3	-0.457213	0.00896332	0.388017	0.00444318	0.040068	TRUE	None
HLTF	3	0.0742542	0.0442868	3	0.0376933	0.0021188	-0.0451203	0.696981	0.892206	FALSE	None
ARHGAP45	3	-0.336136	0.148007	3	-0.260569	0.107012	0.0445739	0.653768	0.859666	FALSE	None
HNRNPD	3	-0.664379	0.0503684	3	-0.235569	0.159721	0.383889	0.00504389	0.0435413	TRUE	None
HNRNPK	3	-3.06203	3.09918	3	-3.26513	6.17753	0.0759194	0.793278	0.944883	FALSE	None
UBE2A	6	-0.513752	0.105228	6	-0.363704	0.0526482	0.116482	0.332944	0.618151	FALSE	None
UBE2E1	3	0.0761522	0.107513	3	-0.132242	0.00577481	-0.174437	0.177619	0.458485	FALSE	None
RIDA	3	-0.489461	0.049469	3	-0.434605	0.130454	0.0267097	0.785915	0.943818	FALSE	None
HSD17B4	3	-0.115667	0.0848078	3	-0.400777	0.0645454	-0.320076	0.00487016	0.0431479	TRUE	None
HSD17B6	3	0.0106123	0.00749677	3	-0.0689338	0.00598368	-0.111824	0.198716	0.491683	FALSE	None
HSF1	3	-0.0872812	0.0544033	3	-1.28237	0.167363	-1.19311	0.000237037	0.00451712	TRUE	Negative
HTRA2	3	-0.303634	0.0498484	3	-0.0771177	0.0267462	0.196226	0.129847	0.391913	FALSE	None
HUS1	3	-2.01879	0.655931	3	-2.11387	0.940835	-0.127238	0.391718	0.673995	FALSE	None
MRPL58	3	-0.537764	0.0187017	3	-0.384164	0.0253948	0.124413	0.236696	0.530602	FALSE	None
ID4	3	-0.102867	0.0462885	3	-0.0124367	0.115663	0.0353207	0.760262	0.928482	FALSE	None
IDH1	3	-0.143466	0.0179692	3	-0.0588821	0.0291364	0.0696785	0.587976	0.820562	FALSE	None
IDH2	3	-0.0915671	0.0236989	3	-0.133968	0.0431126	-0.0825662	0.437942	0.713608	FALSE	None
IDH3A	3	0.0538352	0.000242226	3	-0.0763928	0.0232056	-0.158323	0.0731398	0.280879	TRUE	None
IER3IP1	3	-0.223586	0.0249847	3	-0.482071	0.0450576	-0.286319	0.0563806	0.235212	TRUE	None
IMPDH2	3	-1.08528	0.0878732	3	-0.941291	0.117097	0.131787	0.178371	0.458485	FALSE	None
ING2	3	0.402992	0.00840301	3	0.257408	0.0162701	-0.139868	0.204032	0.497245	FALSE	None
ING5	3	-0.128037	0.0445341	3	-0.313491	0.132156	-0.226937	0.0409613	0.18874	TRUE	None
INO80B	3	-1.30875	0.357457	3	-1.30678	0.763758	-0.00507667	0.967941	0.989529	FALSE	None
INO80D	3	-0.153802	0.0163023	3	0.0322939	0.0316161	0.162076	0.232104	0.529337	FALSE	None
INPP4A	3	-0.54724	0.016215	3	-0.487134	0.107028	0.0298339	0.787177	0.943818	FALSE	None
INPPL1	3	0.0152313	0.0137045	3	0.141195	0.140325	0.0917489	0.545047	0.78981	FALSE	None
INSR	3	-0.0178795	0.000228724	3	0.0208991	0.123792	0.00327118	0.978751	0.989529	FALSE	None
IQCH	3	-0.301677	0.0566403	3	-0.528865	0.0714419	-0.249417	0.016448	0.104481	TRUE	None
IREB2	3	0.23457	0.0341817	3	0.0645999	0.120478	-0.175603	0.146621	0.421653	FALSE	None
IRF2BP1	3	-0.12521	0.184985	3	-0.0917971	0.142975	-0.00664496	0.950642	0.989529	FALSE	None
IRS2	3	-0.232498	0.0554225	3	-0.292388	0.0940077	-0.101175	0.300958	0.592528	FALSE	None
ITGA1	3	-0.318595	0.0483655	3	-0.221685	0.0325432	0.0630175	0.536577	0.787707	FALSE	None
ITGA2	3	-0.0586743	0.00648326	3	-0.135346	0.0017092	-0.101136	0.229205	0.527328	FALSE	None
ITGA3	3	-0.061752	0.00109119	3	-0.261017	0.0233109	-0.21957	0.086508	0.310936	FALSE	None
ITGA4	3	0.341015	0.0390362	3	0.438148	0.0103427	0.118618	0.281105	0.574192	FALSE	None
ITGA5	3	-1.00432	0.0270685	3	-0.368577	0.0267257	0.603714	0.000148976	0.00417961	TRUE	None
ITGA6	3	0.0682634	0.0270066	3	-0.0885219	0.0231441	-0.17271	0.14668	0.421653	FALSE	None
ITGA7	3	-0.283046	0.0169774	3	-0.178004	0.000473223	0.0720022	0.485285	0.749446	FALSE	None
ITGA9	3	-0.173714	0.16291	3	-0.0399093	0.0618102	0.10713	0.351251	0.63464	FALSE	None
ITGAE	3	-0.0366867	0.0179223	3	-0.041026	0.0480907	-0.0337329	0.718945	0.903173	FALSE	None
ITGAV	3	-3.53194	3.81178	3	-3.72546	5.88458	0.0066356	0.980743	0.990259	FALSE	None
ITGB1	3	0.749862	0.0424245	3	1.02651	0.0693362	0.512306	0.00145982	0.0173265	TRUE	None
ITGB4	3	-0.209421	0.0793	3	-0.00103838	0.0212846	0.184791	0.146636	0.421653	FALSE	None
ITGB5	3	-4.59739	0.344495	3	-5.62385	1.23996	-0.708017	0.263469	0.551326	FALSE	None
JAK2	3	-0.0349734	0.105521	3	-0.0294808	0.100147	-0.0228827	0.861389	0.96667	FALSE	None
JTB	3	-2.61316	0.274774	3	-1.63076	0.0813536	0.975204	1.05124e-05	0.000707833	TRUE	Positive
KAT6A	3	0.358452	0.051853	3	0.173912	0.0237506	-0.169014	0.0626501	0.254123	TRUE	None
KAT7	3	0.142766	0.0692629	3	-0.33336	0.117255	-0.50834	0.000189207	0.00421076	TRUE	None
KCTD5	3	2.37584	0.191433	3	1.62952	0.159436	-0.12516	0.225888	0.524762	FALSE	None
KDELR3	3	-0.364855	0.0665986	3	-0.343318	0.0764556	-0.00492669	0.968297	0.989529	FALSE	None
KDM5A	3	0.198158	0.0555293	3	0.1857	0.0363608	0.020127	0.875245	0.968491	FALSE	None
KDM5C	3	-2.10337	0.227201	3	-1.58075	0.0544645	0.524508	0.000856402	0.0120134	TRUE	None
KDM6A	3	0.23674	0.0613537	3	0.112622	0.0435819	-0.146732	0.174358	0.457942	FALSE	None
KEAP1	3	3.06581	0.000649704	3	2.26176	9.64331e-05	0.0744467	0.364492	0.649339	FALSE	None
KIAA0100	3	-1.498	0.236358	3	-1.46952	0.36283	0.0217353	0.868634	0.968491	FALSE	None
KHDC4	3	-0.215516	0.048413	3	-0.182442	0.0296588	0.0171828	0.910684	0.9755	FALSE	None
RIC1	3	-2.24163	0.161028	3	-1.51401	0.066413	0.73236	0.00037802	0.00647119	TRUE	Positive
KIF14	3	-1.02749	0.00250408	3	-1.35631	0.0300978	-0.345344	0.067049	0.266612	TRUE	None
KIF18B	3	-0.012732	0.0576199	3	-0.136398	0.0226475	-0.141294	0.389827	0.673035	FALSE	None
KIF4A	3	-0.566003	0.182883	3	-0.681084	0.207683	-0.140752	0.429726	0.713287	FALSE	None
KIRREL1	3	2.30016	0.0362651	3	2.1242	0.0280882	0.515274	3.95095e-05	0.00199523	TRUE	None
KLF10	3	-0.529988	0.0824213	3	-0.635687	0.371821	-0.12309	0.373503	0.654271	FALSE	None
KLF4	3	-0.116908	0.0502332	3	-0.332186	0.15878	-0.226249	0.0642437	0.258511	TRUE	None
KLF5	3	-0.378257	0.0750643	3	-0.59234	0.0541141	-0.250223	0.0258317	0.139519	TRUE	None
KMT2A	3	-2.24232	0.152413	3	-2.21142	0.0519546	0.0231034	0.929388	0.980858	FALSE	None
KMT2C	3	-0.0641535	0.0333817	3	-0.0253233	0.0759337	0.0102778	0.922423	0.975601	FALSE	None
KMT2D	3	0.176574	0.0580019	3	-0.021711	0.0980679	-0.226231	0.154344	0.428263	FALSE	None
KPNA4	3	-0.657646	0.00683533	3	-0.250934	0.0787864	0.373554	0.0182541	0.111064	TRUE	None
KRAS	3	-4.92067	0.376219	3	-4.33732	0.612311	0.794056	0.00318398	0.0309214	TRUE	Positive
L3MBTL3	3	1.66208	0.14729	3	0.991541	0.327167	-0.289038	0.0400747	0.185667	TRUE	None
LAMTOR5	3	-2.7184	0.671089	3	-2.98477	1.06745	-0.288114	0.111045	0.360627	FALSE	None
LARP7	3	0.782218	0.0344934	3	0.638791	0.0488868	0.0165802	0.875477	0.968491	FALSE	None
LCMT1	3	-0.100478	0.0808217	3	-0.11363	0.0293438	-0.0491115	0.636234	0.850994	FALSE	None
LDHA	3	-0.258569	0.139336	3	-0.336514	0.0834827	-0.10098	0.281046	0.574192	FALSE	None
LDHB	3	-0.104825	0.0176203	3	0.180599	0.0597914	0.236953	0.029881	0.151941	TRUE	None
LGR4	3	-0.0375227	0.0424482	3	0.0509074	0.0651965	0.0568587	0.568581	0.804298	FALSE	None
LIG1	3	-0.496807	0.15825	3	-0.326212	0.02382	0.131078	0.397376	0.680254	FALSE	None
LIG3	3	-0.414501	0.185394	3	-0.33185	0.280799	0.0519868	0.73314	0.91191	FALSE	None
LIG4	3	-1.03433	0.0184873	3	-0.810999	0.0346104	0.205329	0.105018	0.350061	FALSE	None
LIMS1	3	-2.61656	1.55317	3	-2.32608	0.790949	0.26951	0.158662	0.433267	FALSE	None
LIN28B	3	-0.441257	0.143332	3	-0.563586	0.353555	-0.156136	0.272246	0.564796	FALSE	None
LIPT1	3	-0.514564	0.0912795	3	-0.500601	0.157758	-0.017208	0.87473	0.968491	FALSE	None
LMNA	3	-0.507722	0.347822	3	-0.790448	0.253163	-0.299571	0.0556015	0.233019	TRUE	None
LMO2	3	0.0264855	0.0688814	3	-0.0416294	0.0139196	-0.0735448	0.497993	0.758626	FALSE	None
LRP5	3	-0.449132	0.00505709	3	-0.452891	0.174052	-0.038239	0.799298	0.946488	FALSE	None
LRP6	3	-0.724986	0.000444515	3	-0.57382	0.00388034	0.118916	0.363587	0.649339	FALSE	None
LRRC45	3	-0.0134257	0.126332	3	0.00437297	0.0184683	-0.0135034	0.904193	0.9755	FALSE	None
LRRC49	3	-0.208174	0.0278851	3	-0.257786	0.039328	-0.0724144	0.425023	0.709542	FALSE	None
LYRM4	3	-3.44951	0.670455	3	-4.06781	2.4068	-0.576406	0.248096	0.538913	FALSE	None
MAD1L1	3	-1.27267	0.280592	3	-1.13453	0.197781	0.140965	0.15778	0.433267	FALSE	None
MAD2L2	3	-2.39661	1.64583	3	-2.25853	1.93462	0.0715442	0.810606	0.946488	FALSE	None
MANF	3	-0.44171	0.101047	3	-0.284921	0.101381	0.112789	0.205791	0.497245	FALSE	None
MAP2K1	3	-0.375101	0.0757174	3	-0.286154	0.0202463	0.0667508	0.532143	0.785534	FALSE	None
MAP2K4	3	0.350468	0.180614	3	0.397497	0.0702286	0.100439	0.279122	0.574161	FALSE	None
MAP2K5	3	-2.98081	0.320527	3	-2.66545	0.30314	0.258734	0.364407	0.649339	FALSE	None
MAP3K1	3	0.0560835	0.263099	3	0.0528712	0.168184	-0.0184218	0.869875	0.968491	FALSE	None
MAP4K4	3	1.96312	0.0675004	3	1.36382	0.0232776	-0.102272	0.234855	0.530202	FALSE	None
MAPK1	3	-1.53884	0.390238	3	-1.68438	0.769523	-0.157824	0.317519	0.607317	FALSE	None
MARCHF5	3	-0.0233424	0.000812386	3	0.109225	0.0247455	0.0834128	0.30499	0.596809	FALSE	None
MARK2	3	-3.43967	0.108188	3	-2.57974	0.00167274	0.785054	0.00124383	0.0161061	TRUE	Positive
MAT2B	3	-0.0934374	0.119271	3	-0.178387	0.616212	-0.114857	0.63693	0.850994	FALSE	None
MATR3	3	-1.77273	0.0695512	3	-2.32198	0.100901	-0.547471	0.00261912	0.0267243	TRUE	None
MBNL1	3	-2.39338	0.741185	3	-1.78585	0.641923	0.577163	0.0621629	0.253163	TRUE	None
MBTD1	3	-0.540195	0.0361009	3	-0.531721	0.0128606	-0.0247528	0.824034	0.954443	FALSE	None
MCCC2	3	-0.183905	0.0130733	3	-0.157087	0.0106653	-0.0215041	0.889779	0.973648	FALSE	None
MCL1	3	-0.122648	0.00407303	3	-0.0446278	0.0063349	0.044422	0.639462	0.850994	FALSE	None
MCM10	3	-1.51859	2.04843	3	-1.81321	1.83545	-0.310393	0.170138	0.453401	FALSE	None
MCM2	3	-3.82241	0.346863	3	-4.05702	0.623905	-0.268268	0.438763	0.713608	FALSE	None
MCM3	3	-2.14091	2.17079	3	-1.87524	1.64452	0.242643	0.0705447	0.275097	TRUE	None
MCM4	3	-2.49374	0.0829977	3	-2.60315	0.0673347	-0.13191	0.515388	0.774616	FALSE	None
MCM5	3	-3.2899	3.88481	3	-3.2249	3.74505	0.130922	0.762957	0.928482	FALSE	None
MCM6	3	-4.29956	2.05523	3	-4.79616	5.15487	-0.469464	0.26151	0.551326	FALSE	None
MCM7	3	-1.82096	0.838042	3	-1.5131	0.250372	0.303597	0.0524964	0.226587	TRUE	None
MCM9	3	-0.541416	0.0197434	3	-0.751919	0.167179	-0.235406	0.178232	0.458485	FALSE	None
MDH2	3	-0.217525	0.0789603	3	-0.063619	0.0131991	0.128251	0.233389	0.530202	FALSE	None
MDK	3	-0.211582	0.0492664	3	-0.0411909	0.0814557	0.137912	0.249291	0.538913	FALSE	None
MDM2	3	-0.162066	0.00213282	3	-0.119502	0.0121919	0.0127868	0.88448	0.971235	FALSE	None
MDM4	3	-0.118127	0.0268627	3	-0.18876	0.00715732	-0.0989723	0.292494	0.582681	FALSE	None
MEAF6	3	-1.6337	0.000316557	3	-1.81765	0.104419	-0.177704	0.341846	0.624349	FALSE	None
MED1	3	-3.36918	2.02895	3	-3.46718	4.36456	0.036889	0.892453	0.974463	FALSE	None
MED12	3	-2.44841	2.16897	3	-2.83653	2.04902	-0.436726	0.251519	0.539351	FALSE	None
MED13L	3	-0.238445	0.168849	3	-0.293616	0.0915867	-0.0861644	0.430652	0.713287	FALSE	None
MED16	3	-0.806013	0.161162	3	-0.526525	0.0424456	0.250427	0.0573361	0.236365	TRUE	None
MED23	3	-1.89599	0.0450621	3	-1.60232	0.102829	0.303492	0.0349161	0.168902	TRUE	None
MED24	3	-2.57907	1.17607	3	-2.12102	0.495965	0.4362	0.0325042	0.160143	TRUE	None
MED25	3	-1.02894	0.00216688	3	-0.893433	0.0188563	0.113804	0.374455	0.654271	FALSE	None
MEN1	3	-1.31466	0.467878	3	-1.53796	0.0313837	-0.219573	0.179763	0.458485	FALSE	None
MET	3	-0.0764825	0.00908406	3	-0.090601	0.0156711	-0.037639	0.704615	0.897429	FALSE	None
MFSD9	3	-0.258849	0.0164511	3	-0.321132	0.254295	-0.0997099	0.542274	0.789473	FALSE	None
MGA	3	-0.405999	0.0210928	3	-0.38221	0.060658	-0.00766501	0.939941	0.987432	FALSE	None
MGAT1	3	-1.7024	0.230149	3	-1.14846	0.182148	0.559035	0.000234938	0.00451712	TRUE	None
MGAT5	3	-0.552826	0.0120399	3	-0.192963	0.00628691	0.324028	0.00284744	0.0284744	TRUE	None
OGA	3	-0.193745	0.0221284	3	-0.733524	0.0117093	-0.573676	0.000218994	0.00433695	TRUE	None
MGMT	3	-0.111921	0.00801622	3	0.0585992	0.00384731	0.146797	0.33194	0.618151	FALSE	None
MIB1	3	-0.482145	0.0373882	3	-0.903035	0.0896766	-0.448224	0.0157545	0.101689	TRUE	None
MITF	3	-0.39318	0.112757	3	-0.254878	0.0711256	0.108293	0.385339	0.670666	FALSE	None
MLH1	3	-0.390518	0.0259425	3	-0.325419	0.018387	0.0345774	0.788612	0.943818	FALSE	None
MLH3	3	-0.00666185	0.0176058	3	-0.0665217	0.0336957	-0.0740107	0.514967	0.774616	FALSE	None
MAP3K20	3	0.0896979	0.00463189	3	0.0826997	0.023152	-0.0328911	0.723496	0.90549	FALSE	None
MMGT1	3	-2.15097	1.81695	3	-1.92942	1.62746	0.187719	0.326715	0.614491	FALSE	None
MNT	3	-0.0583855	0.0270941	3	-0.291432	0.0297771	-0.26867	0.0445678	0.201854	TRUE	None
MOGS	3	-1.47238	0.0527178	3	-1.08162	0.178036	0.407093	0.0135728	0.0901876	TRUE	None
MORC2	3	-0.318058	0.203514	3	-0.146197	0.27528	0.141807	0.175273	0.457942	FALSE	None
MPC1	3	-0.4228	0.184195	3	-0.31126	0.167781	0.0780503	0.605404	0.831916	FALSE	None
MPHOSPH8	3	-0.235425	0.0478584	3	-0.276202	0.0347537	-0.0792573	0.507311	0.767796	FALSE	None
MRE11	3	-2.62197	4.82238	3	-3.25727	9.62195	-0.456261	0.137646	0.407689	FALSE	None
MRPL28	3	-0.946591	0.105611	3	-1.82249	0.0030893	-0.87784	0.000127989	0.00415931	TRUE	Negative
MRPL41	3	-0.734575	0.114328	3	-0.892237	0.537665	-0.174275	0.247542	0.538913	FALSE	None
MRPS21	3	-1.2168	0.0186305	3	-1.69822	0.0806255	-0.461856	0.00499544	0.0434947	TRUE	None
MSH2	3	-0.309879	0.0177132	3	-0.225418	0.0462077	0.0623306	0.423577	0.70903	FALSE	None
MSH3	3	-0.205595	0.0492928	3	-0.104214	0.0261808	0.0734312	0.521193	0.778706	FALSE	None
MSH6	3	-0.380298	0.0316374	3	-0.316583	0.019877	0.0296381	0.75487	0.924144	FALSE	None
MTF2	3	-1.07337	4.27072	3	-0.808465	2.69094	0.239238	0.0944171	0.328832	FALSE	None
MTFMT	3	-0.519156	0.0060757	3	-0.858565	0.0391627	-0.366679	0.0632732	0.255624	TRUE	None
MTG1	3	-0.271808	0.0536508	3	-0.381438	0.090814	-0.121785	0.284868	0.576587	FALSE	None
MTHFD1L	3	0.0335281	0.0912755	3	0.152882	0.00805861	0.0872173	0.385799	0.670666	FALSE	None
MTX1	3	-1.16182	0.0263705	3	-0.73257	0.0083743	0.418914	0.0027007	0.027277	TRUE	None
MUS81	3	-0.659482	0.0415322	3	-0.418021	0.114507	0.20393	0.164873	0.444058	FALSE	None
MYD88	3	-0.313767	0.00673289	3	-0.429416	0.00517853	-0.146778	0.318494	0.607317	FALSE	None
MYH9	3	-2.88224	0.491717	3	-2.83894	1.11483	0.011774	0.955871	0.989529	FALSE	None
MYL6	3	-0.461438	0.0759586	3	-0.121836	0.0183876	0.313944	0.0123376	0.0853495	TRUE	None
MZT2B	3	-0.740805	0.149281	3	-0.742348	0.102772	-0.0315611	0.783418	0.942561	FALSE	None
NACC1	3	-0.736735	0.0256002	3	-0.88302	0.0574512	-0.167856	0.126548	0.387313	FALSE	None
NADK	3	-0.505356	0.000200518	3	-0.358923	0.0436518	0.117555	0.418487	0.704453	FALSE	None
NAGK	3	0.0165359	0.0570247	3	0.0218354	0.014296	-0.0349086	0.777514	0.938218	FALSE	None
NAMPT	3	-0.0105906	0.0177471	3	0.0155371	0.0423064	-0.00242751	0.984376	0.990259	FALSE	None
NBN	3	0.130826	0.0173553	3	0.156914	0.0268968	0.0285496	0.825479	0.955021	FALSE	None
NCOR1	3	0.314506	0.0123888	3	0.247844	0.0842051	-0.0686333	0.562236	0.802498	FALSE	None
NCSTN	3	-2.01002	0.0135187	3	-1.57922	0.0208673	0.443773	0.0178827	0.110131	TRUE	None
NDUFA11	3	-0.26106	0.0190105	3	-0.207662	0.00431751	0.0246148	0.792	0.944883	FALSE	None
NDUFAF3	3	-0.651324	0.0302263	3	-0.744593	0.0250973	-0.121127	0.244121	0.536802	FALSE	None
NDUFAF6	3	-0.259731	0.0181042	3	-0.235223	0.000794705	0.00208358	0.982394	0.990259	FALSE	None
NDUFB10	3	-0.446591	0.114637	3	-0.588743	0.0674714	-0.165624	0.0903113	0.31782	FALSE	None
NDUFB11	3	-0.474822	0.11182	3	-0.376153	0.0264687	0.0715375	0.596842	0.82462	FALSE	None
NDUFC1	3	-0.378116	0.023831	3	-0.182057	0.0390743	0.160302	0.109318	0.357318	FALSE	None
NDUFS6	3	-0.219795	0.0881571	3	-0.145784	0.11693	0.0589351	0.459398	0.732563	FALSE	None
NEIL1	3	-1.36877	1.98241	3	-1.39072	2.31285	-0.0660688	0.602193	0.828784	FALSE	None
NELFE	3	-0.630073	0.566639	3	-0.892162	0.656785	-0.282179	0.0880647	0.315409	FALSE	None
NEMF	3	-0.460838	0.0325363	3	-0.380871	0.00201631	0.0580387	0.602304	0.828784	FALSE	None
NEO1	3	-0.103749	0.404025	3	-0.0615457	0.359209	0.0381676	0.739776	0.916777	FALSE	None
NF1	3	-0.352667	0.167651	3	-0.223631	0.501932	0.0921787	0.482634	0.747638	FALSE	None
NF2	3	4.59308	0.0439067	3	2.51948	0.0228799	-0.677102	0.0007238	0.0104434	TRUE	None
NFE2L1	3	-0.2064	0.0195617	3	-2.473	0.144697	-2.24721	8.74582e-08	6.18623e-05	TRUE	Negative
NFE2L2	3	-0.374958	0.200586	3	-0.301727	0.230903	0.0411237	0.76301	0.928482	FALSE	None
NGLY1	3	-0.261375	0.0367801	3	-3.18996	0.811865	-2.91509	7.42088e-07	8.32787e-05	TRUE	Negative
NHEJ1	3	-0.894239	0.0452697	3	-0.610235	0.0600187	0.254889	0.0376586	0.176908	TRUE	None
NHLRC2	3	-4.10023	0.105872	3	-3.73694	0.430328	0.263033	0.505114	0.766014	FALSE	None
NKX2-1	3	-0.000359956	0.0329638	3	0.165052	0.0037663	0.158912	0.15844	0.433267	FALSE	None
NKX3-1	3	-0.0305862	0.0155621	3	0.0731106	0.00603035	0.0538985	0.586082	0.819865	FALSE	None
NME6	3	-0.5225	0.0634061	3	-0.719501	0.0157976	-0.232656	0.0692397	0.272109	TRUE	None
NONO	3	-0.898245	0.150462	3	-0.565218	0.0840824	0.303248	0.0158071	0.101689	TRUE	None
NOP16	3	-3.36818	0.767061	3	-3.85949	0.604592	-0.52724	0.0241936	0.136511	TRUE	None
NOTCH1	3	-0.0779832	0.023044	3	0.0455755	0.0130688	0.0959573	0.358559	0.644385	FALSE	None
NOTCH2	3	-0.231232	0.000910529	3	-0.126543	0.0221229	0.068495	0.531172	0.785534	FALSE	None
NOTCH3	3	-0.083004	0.11121	3	0.0699247	0.0981838	0.14956	0.263654	0.551326	FALSE	None
NPRL2	3	0.262463	0.0043188	3	0.325178	0.104662	0.0786113	0.578763	0.813194	FALSE	None
NRAS	3	0.155871	0.00443199	3	-0.126341	0.0643951	-0.303953	0.0140691	0.0928745	TRUE	None
NSD1	3	-0.153313	0.052293	3	0.182357	0.0201442	0.321427	0.00392024	0.0363251	TRUE	None
NSUN2	3	-0.496332	0.0141164	3	-0.2329	0.000431504	0.227954	0.0300873	0.151941	TRUE	None
NSUN3	3	-0.297129	0.0218005	3	-0.190574	0.0427539	0.0782638	0.464154	0.732563	FALSE	None
NUDT16L1	3	-0.303134	0.0153144	3	-0.188718	0.0105906	0.0843842	0.561955	0.802498	FALSE	None
NUDT19	3	-0.685918	1.00314	3	-0.707003	1.09183	-0.0527479	0.616011	0.839636	FALSE	None
NUFIP2	3	-0.440614	0.00307864	3	-0.206298	0.0650197	0.191864	0.199694	0.491929	FALSE	None
NXT1	3	0.806077	0.00631893	3	0.67293	0.00295183	0.0304302	0.741742	0.917357	FALSE	None
OLA1	3	-0.844801	0.240597	3	-0.792076	0.0842658	0.045798	0.638073	0.850994	FALSE	None
ORC1	3	-1.04814	0.116065	3	-0.77949	0.102906	0.251036	0.0650254	0.259587	TRUE	None
ORC2	3	-2.95134	2.05797	3	-2.99107	2.93805	-0.0752576	0.818811	0.953086	FALSE	None
OTUB1	3	-0.995933	0.000634847	3	-0.668071	0.00312751	0.315169	0.0262764	0.13968	TRUE	None
OTUD5	3	1.16056	0.00575765	3	0.962504	0.0208844	0.101988	0.256835	0.544965	FALSE	None
PAIP1	3	-0.448248	0.185203	3	-0.24701	0.0828348	0.163108	0.147412	0.421653	FALSE	None
PALB2	3	-1.787	1.02561	3	-1.5071	0.313909	0.272869	0.175565	0.457942	FALSE	None
APLF	3	-0.15029	0.0227659	3	-0.132785	0.00840468	-0.0153716	0.874137	0.968491	FALSE	None
PAPSS1	3	-0.00442468	0.00526738	3	-0.00209255	0.00845023	-0.035777	0.739171	0.916777	FALSE	None
PARP1	3	-0.579409	0.0795363	3	-0.595994	0.106385	-0.0384292	0.648298	0.856989	FALSE	None
PARP10	3	-0.304577	0.0526903	3	-0.280711	0.017128	-0.0108699	0.914661	0.9755	FALSE	None
PARP11	3	-0.385324	0.0737776	3	-0.142561	0.120074	0.200375	0.0720331	0.278301	TRUE	None
PARP12	3	-0.00806365	0.00249415	3	0.00869426	0.0207207	-0.0247515	0.807473	0.946488	FALSE	None
PARP14	3	-0.0552599	0.00257245	3	0.00927975	0.00228181	0.0202149	0.80803	0.946488	FALSE	None
PARP15	3	-0.282167	0.0342768	3	-0.315666	0.0161308	-0.066582	0.566798	0.804026	FALSE	None
PARP16	3	0.113879	0.0743642	3	-0.0552937	0.170773	-0.178172	0.125592	0.386732	FALSE	None
PARP2	3	-0.125184	0.00521101	3	-0.203846	0.0161753	-0.109925	0.287368	0.577674	FALSE	None
PARP3	3	-0.366312	0.0300121	3	-0.416678	0.0689593	-0.0843244	0.533487	0.785534	FALSE	None
PARP4	3	-0.0121615	0.00477729	3	-0.0065074	0.00993294	-0.0261989	0.808265	0.946488	FALSE	None
PARP6	3	-0.0145141	0.029938	3	0.0516792	0.0212354	0.0346846	0.75411	0.924144	FALSE	None
PARP8	3	-0.23019	0.000658319	3	-0.182011	0.0425791	0.0144479	0.901835	0.9755	FALSE	None
PARP9	3	0.0995391	0.00803539	3	0.152937	0.0789909	0.0340401	0.727374	0.908094	FALSE	None
PAWR	3	0.51772	0.0598741	3	0.519268	0.0345742	0.0954355	0.368063	0.649339	FALSE	None
PAXIP1	3	1.04739	0.0369426	3	0.50097	0.0113226	-0.361446	0.000622637	0.00952823	TRUE	None
PBDC1	3	0.023528	0.0620496	3	-0.0519071	0.0428655	-0.094322	0.338277	0.62233	FALSE	None
PBRM1	3	-1.40784	0.405819	3	-0.779455	0.13395	0.62603	0.00206292	0.0226473	TRUE	None
PCBP1	3	-1.19455	0.103309	3	-1.65967	0.105258	-0.445315	0.00300046	0.029422	TRUE	None
PCGF3	3	-0.00605266	0.0349572	3	-0.250867	0.102539	-0.289823	0.0100362	0.0739893	TRUE	None
PDCD10	3	1.34373	0.0115127	3	0.305907	0.0005744	-0.82944	2.02175e-06	0.000170164	TRUE	Negative
PDCD5	3	-2.09852	0.38659	3	-1.4801	0.214655	0.624204	0.00232563	0.0247251	TRUE	None
PDCD6IP	3	-0.184637	0.0676147	3	-0.118762	0.0059617	0.0512994	0.67521	0.87431	FALSE	None
PDCL	3	-2.65153	0.342448	3	-2.26583	0.0122679	0.354885	0.105991	0.35214	FALSE	None
PDGFRA	3	-0.274804	0.0607748	3	-0.36829	0.0308325	-0.124459	0.226199	0.524762	FALSE	None
PDHA1	3	-0.241298	0.00566869	3	-0.198304	0.038867	0.0231334	0.801617	0.946488	FALSE	None
PDK1	3	-0.202957	0.00797572	3	-0.0947797	0.11081	0.0652241	0.550828	0.793632	FALSE	None
PDS5A	3	-1.13991	0.00830923	3	-1.7	0.00215546	-0.539062	0.000208025	0.0043291	TRUE	None
PDSS1	3	-0.805522	0.133692	3	-0.709442	0.115788	0.0740655	0.540836	0.789473	FALSE	None
PELO	3	-2.23294	0.184015	3	-1.98578	0.140561	0.239374	0.287968	0.577674	FALSE	None
PFKM	3	-0.20635	0.0152653	3	-0.333797	0.00451217	-0.159272	0.163033	0.440277	FALSE	None
PGAP2	3	-0.611929	0.147755	3	-0.229524	0.00501054	0.343242	0.0373776	0.176408	TRUE	None
PGLS	3	-0.772324	0.311856	3	-0.44409	0.221618	0.292038	0.0371332	0.176078	TRUE	None
PGM2	3	0.0533629	0.0632747	3	0.0749982	0.0726602	-0.00153956	0.989729	0.994653	FALSE	None
PGP	3	-0.294857	0.00370306	3	-0.0121104	0.0145866	0.250212	0.0162782	0.104057	TRUE	None
PHF12	3	-0.970374	0.243612	3	-0.802405	0.00226806	0.154878	0.386913	0.671448	FALSE	None
PHGDH	3	0.0404601	0.0215104	3	0.185312	0.0200596	0.117317	0.345724	0.628024	FALSE	None
PHLPP1	3	0.0703598	0.014935	3	0.138653	0.0252137	0.0259238	0.830656	0.955783	FALSE	None
PIAS1	3	-0.294412	0.011163	3	-0.339784	0.00498795	-0.0772872	0.476849	0.741777	FALSE	None
PIAS2	3	0.484639	0.0337376	3	0.36207	0.00790403	-0.0921786	0.41371	0.69874	FALSE	None
PIAS3	3	-0.423759	0.107415	3	-0.527283	0.14564	-0.136513	0.125091	0.386368	FALSE	None
PIAS4	3	0.361695	0.0817361	3	0.449183	0.0721398	0.129199	0.159196	0.433267	FALSE	None
PICALM	3	-0.565341	0.00169416	3	-0.34574	0.00214875	0.180191	0.142372	0.416799	FALSE	None
PIGB	3	-0.59207	0.0828944	3	-0.411492	0.190956	0.151876	0.225755	0.524762	FALSE	None
PIGF	3	-0.596863	0.0729154	3	-0.285413	0.019267	0.275569	0.0542071	0.231009	TRUE	None
PIH1D1	3	-0.625629	0.0243757	3	-0.881479	0.216073	-0.269336	0.0751636	0.286473	TRUE	None
PIK3CA	3	-0.658913	0.101813	3	-0.665954	0.0741177	-0.0280009	0.861051	0.96667	FALSE	None
PIK3R1	3	0.126477	0.0172611	3	0.171384	0.0489491	0.0187006	0.853331	0.964054	FALSE	None
PIN1	3	0.0284782	0.00848656	3	0.117022	0.0149426	0.0628863	0.597486	0.82462	FALSE	None
PITRM1	3	-1.24351	0.177764	3	-0.196062	0.0823518	1.01953	4.59129e-06	0.000331229	TRUE	Positive
PKP2	3	-0.270923	0.199191	3	-0.231249	0.343173	0.00631316	0.954325	0.989529	FALSE	None
PLAA	3	-0.165086	0.00728934	3	-0.159184	0.0028094	-0.0246784	0.83457	0.956208	FALSE	None
PMAIP1	3	0.0940579	0.0713857	3	0.0563878	0.0247831	-0.0361762	0.757206	0.925881	FALSE	None
PMM2	3	-0.403169	0.0656677	3	-0.447303	0.00353088	-0.0742265	0.611441	0.837932	FALSE	None
PMS1	3	-0.209514	0.0254342	3	-0.119442	0.0101157	0.0640003	0.531783	0.785534	FALSE	None
PMS2	3	-0.273668	0.0813246	3	-0.239995	0.117859	0.0105137	0.914356	0.9755	FALSE	None
PNPO	3	-0.369467	0.00293126	3	-0.293313	0.0157679	0.0441996	0.61689	0.839703	FALSE	None
PNRC2	3	-0.711853	0.207025	3	-0.799372	0.503331	-0.111591	0.339075	0.622665	FALSE	None
POLA1	3	-1.86333	1.17458	3	-2.05548	1.83074	-0.219147	0.136412	0.405224	FALSE	None
POLB	3	0.0199851	0.000331457	3	-0.0764873	0.0755963	-0.101452	0.411586	0.697486	FALSE	None
POLD1	3	-0.36247	0.174886	3	-0.164713	0.172182	0.164718	0.198301	0.491683	FALSE	None
POLD3	3	-4.62082	6.15802	3	-4.31893	6.47015	0.603628	0.124253	0.384954	FALSE	None
POLE	3	-3.36285	2.00727	3	-3.82013	2.37993	-0.459768	0.173129	0.457249	FALSE	None
POLE3	3	-1.92421	0.063191	3	-2.41613	0.0567797	-0.495954	0.00621112	0.0518449	TRUE	None
POLE4	3	-1.42254	0.0679385	3	-1.62709	0.194495	-0.199145	0.338066	0.62233	FALSE	None
POLG2	3	-1.01002	0.0281811	3	-1.50254	0.0277614	-0.488397	0.000186448	0.00421076	TRUE	None
POLH	3	-0.492792	0.309171	3	-0.426627	0.0887086	0.0445128	0.713268	0.903173	FALSE	None
POLI	3	-0.184609	0.328128	3	-0.242436	0.452113	-0.0680599	0.614047	0.839636	FALSE	None
POLK	3	-0.131818	0.0395565	3	-0.0901444	0.0448163	0.00222458	0.983432	0.990259	FALSE	None
POLL	3	-0.250155	0.0524573	3	-0.449201	0.0514349	-0.228369	0.130767	0.391913	FALSE	None
POLM	3	-0.210412	0.302707	3	-0.0690899	0.0934356	0.126059	0.248479	0.538913	FALSE	None
POLN	3	-0.202272	0.0152816	3	-0.0955455	0.0125409	0.0697839	0.542991	0.789473	FALSE	None
POLQ	3	-0.942783	0.0164048	3	-0.485671	0.222979	0.424039	0.00403576	0.0370556	TRUE	None
POLR2G	3	-3.67655	0.0160928	3	-3.46847	0.0416928	0.1237	0.595813	0.82462	FALSE	None
POT1	3	-3.23746	0.385181	3	-2.34804	0.144582	0.823044	0.00134502	0.0164359	TRUE	Positive
PPHLN1	3	-0.0785477	0.0506324	3	-0.0590305	0.0492863	-0.0148398	0.872384	0.968491	FALSE	None
PPM1G	3	-0.108604	0.00722455	3	0.0802203	0.000420671	0.163701	0.152308	0.425664	FALSE	None
PPP1R18	3	0.020265	0.0539511	3	-0.0155897	0.0429786	-0.0582434	0.592638	0.824587	FALSE	None
PTPA	3	-1.30962	0.0417662	3	-0.786922	0.16699	0.512147	0.00172187	0.0195403	TRUE	None
PPP6R3	3	0.114778	0.0628143	3	0.219714	0.00671438	0.0765367	0.534319	0.785534	FALSE	None
SLC66A2	3	-0.00271077	0.053504	3	0.0988215	0.00814129	0.062543	0.46275	0.732563	FALSE	None
PRDX1	3	-0.69245	0.107682	3	-0.526046	0.0593304	0.138112	0.237121	0.530602	FALSE	None
PRKAA1	3	-0.106647	3.63156e-05	3	-0.0153726	0.00496813	0.055658	0.523238	0.780606	FALSE	None
PRKAG1	3	-0.0887713	0.0297517	3	-0.237433	0.0016052	-0.184415	0.12328	0.383598	FALSE	None
PRKDC	3	-1.74088	0.127901	3	-1.03476	0.124214	0.71411	0.000167805	0.00421076	TRUE	Positive
PRPF40B	3	-0.405696	0.0669491	3	-0.27876	0.0639268	0.105385	0.282822	0.575908	FALSE	None
GINS3	3	-0.301675	0.0161413	3	-0.211623	0.0590238	0.06039	0.502733	0.76355	FALSE	None
PSMC3IP	3	-0.20944	0.0662054	3	-0.05581	0.0303521	0.110038	0.466905	0.732563	FALSE	None
PSMD6	3	-2.08881	0.251925	3	-0.996395	0.0522117	1.08942	0.000209518	0.0043291	TRUE	Positive
PSPC1	3	0.237587	0.0330534	3	0.134339	0.182795	-0.120302	0.374943	0.654271	FALSE	None
PTAR1	3	-2.70038	0.471716	3	-1.7737	0.2138	0.907438	7.32074e-05	0.00336088	TRUE	Positive
PTBP1	3	-1.39011	1.27686	3	-1.37686	0.561712	-0.0122166	0.940505	0.987432	FALSE	None
PTEN	3	3.10244	0.023306	3	2.67581	0.0257722	0.57353	0.000161739	0.00421076	TRUE	None
PTK7	3	-0.376278	0.0106999	3	-0.118253	0.0045247	0.215438	0.0994079	0.339196	FALSE	None
PXMP4	3	-0.40402	0.0227052	3	-0.250292	0.0181867	0.11867	0.235179	0.530202	FALSE	None
PYCARD	3	-0.585408	0.151139	3	-0.327009	0.137756	0.22349	0.071397	0.27735	TRUE	None
QRICH1	3	-0.962291	0.322658	3	-1.28409	0.367348	-0.338347	0.024796	0.137604	TRUE	None
QSOX2	3	-0.348189	0.0494889	3	-0.324965	0.120287	-0.00661679	0.958907	0.989529	FALSE	None
RAB10	3	-1.54101	0.312988	3	-1.38635	0.0227364	0.169047	0.249714	0.538913	FALSE	None
RAB40B	3	-0.185174	0.153936	3	-0.00393945	0.0599011	0.140134	0.217377	0.51659	FALSE	None
RABL3	3	0.222106	0.0557193	3	0.276503	0.012551	0.0447739	0.62963	0.849847	FALSE	None
RABL6	3	-0.0797414	0.131843	3	-0.12002	0.0524262	-0.0772342	0.461521	0.732563	FALSE	None
RAC2	3	-0.0213249	0.00347377	3	0.0108993	0.00848041	0.0125898	0.904051	0.9755	FALSE	None
RAD1	3	-2.18053	0.0584852	3	-2.71322	0.0199075	-0.549126	0.0127068	0.0864485	TRUE	None
RAD17	3	-1.86486	2.21778	3	-1.89567	2.77216	-0.04317	0.859305	0.96667	FALSE	None
RAD18	3	-0.319562	0.109974	3	-0.254829	0.0309734	0.0350389	0.712418	0.903173	FALSE	None
RAD50	3	-2.0785	0.690252	3	-2.23771	0.556033	-0.170075	0.427107	0.71075	FALSE	None
RAD51	3	-3.5294	0.164562	3	-3.87506	0.19698	-0.415434	0.159274	0.433267	FALSE	None
RAD51B	3	-3.35328	0.0868452	3	-3.58739	0.0779975	-0.317268	0.190076	0.479445	FALSE	None
RAD51C	3	-5.49702	2.33069	3	-5.01205	0.295584	0.707299	0.199107	0.491683	FALSE	None
RAD51D	3	-4.73667	0.33343	3	-4.75916	0.0151834	-0.0156495	0.974818	0.989529	FALSE	None
RAD52	3	-0.338252	0.132949	3	-0.254754	0.379477	0.0702977	0.564368	0.802498	FALSE	None
RAD54B	3	-0.341345	0.365486	3	-0.431952	0.165717	-0.104181	0.546135	0.790253	FALSE	None
RAD54L	3	-0.649448	0.0819271	3	-0.429509	0.0599243	0.203614	0.122922	0.383598	FALSE	None
RAD54L2	3	0.131725	0.0835057	3	0.0616377	0.125328	-0.0670177	0.576762	0.812455	FALSE	None
UBE2B	3	-0.0700758	0.146247	3	0.0296504	0.00123373	0.083664	0.50781	0.767796	FALSE	None
RAI1	3	-0.520031	0.051398	3	-0.244682	0.0151472	0.246333	0.00838515	0.0632015	TRUE	None
RALGAPB	3	1.7154	0.0583089	3	0.887701	0.101983	-0.457909	0.00340968	0.0324884	TRUE	None
RANBP1	3	-2.28567	0.296864	3	-2.48532	0.205037	-0.234348	0.3216	0.610557	FALSE	None
RAP1A	3	0.0138206	0.0763599	3	-0.155805	0.103461	-0.169779	0.224506	0.524762	FALSE	None
RARB	3	-0.791336	0.024443	3	-0.897231	0.0116509	-0.130788	0.241036	0.533873	FALSE	None
RB1	3	1.28434	0.0554127	3	1.19989	0.00371632	0.27424	0.00651385	0.0534877	TRUE	None
RB1CC1	3	0.560117	0.0777231	3	0.360993	0.0974087	-0.140158	0.218181	0.517283	FALSE	None
RBM10	3	-0.293923	0.0110419	3	-0.235249	0.0405449	0.0304684	0.794447	0.945102	FALSE	None
RBM18	3	-0.589994	0.062801	3	-0.257582	0.130153	0.306202	0.0822423	0.299873	TRUE	None
RBP1	3	-0.0211923	0.0401159	3	-0.0560874	0.44825	-0.0435489	0.773631	0.936891	FALSE	None
RECQL	3	0.0394291	0.0518871	3	0.0725792	0.0449977	0.00294809	0.974682	0.989529	FALSE	None
RECQL4	3	0.0910021	0.122265	3	0.152483	0.153078	0.062521	0.588205	0.820562	FALSE	None
RECQL5	3	-0.135885	0.012422	3	-0.0198735	0.00915291	0.0921586	0.465446	0.732563	FALSE	None
REST	3	-0.779165	0.24133	3	-0.81236	0.188399	-0.059462	0.642452	0.853785	FALSE	None
RET	3	0.226301	0.0483028	3	0.124153	0.014259	-0.121749	0.223051	0.52391	FALSE	None
REV1	3	-0.970483	1.60784	3	-1.08973	3.30755	-0.163162	0.36903	0.649339	FALSE	None
REV3L	3	-1.43414	0.164715	3	-1.34247	0.403095	0.0851985	0.459656	0.732563	FALSE	None
REXO2	3	-0.111147	0.0181992	3	0.0839163	0.00207628	0.168859	0.0683529	0.270731	TRUE	None
COP1	3	-0.849869	0.171414	3	-1.07695	0.113667	-0.247567	0.0386225	0.180596	TRUE	None
RHBDD3	3	-0.205402	0.00585146	3	-0.174374	0.00661015	-0.0134339	0.911266	0.9755	FALSE	None
RHNO1	3	-0.268852	0.0228558	3	-0.142367	0.0240665	0.09776	0.389633	0.673035	FALSE	None
RHOBTB1	3	-0.171157	0.089612	3	-0.138199	0.0265216	-0.0141792	0.886067	0.971395	FALSE	None
RIC8A	3	-2.86057	1.11007	3	-2.40077	0.432324	0.433473	0.204378	0.497245	FALSE	None
RIF1	3	-1.35076	0.00553518	3	-1.6347	0.00746655	-0.257157	0.0390322	0.181671	TRUE	None
RMI1	3	-1.81239	3.13207	3	-1.78779	3.94571	-0.0113131	0.944407	0.989529	FALSE	None
RMI2	3	-0.478536	0.0227634	3	-0.490554	0.00953013	-0.0440078	0.694271	0.891192	FALSE	None
RMND1	3	-0.355236	0.0335566	3	-0.463991	0.113422	-0.131877	0.27677	0.570486	FALSE	None
RNF10	3	-0.267741	0.00288997	3	-0.476739	0.0982396	-0.242851	0.0768719	0.287608	TRUE	None
RNF103	3	0.162283	0.0971504	3	-0.270691	0.330952	-0.419891	0.0283951	0.14783	TRUE	None
RNF11	3	-0.418668	0.0527053	3	-0.423684	0.137901	-0.031591	0.783912	0.942561	FALSE	None
RNF111	3	0.0292715	0.00695958	3	0.142917	0.0181362	0.100429	0.334258	0.619451	FALSE	None
RNF112	3	-0.0994595	0.00222371	3	-0.0345911	0.00388344	0.0378178	0.660045	0.862413	FALSE	None
RNF113B	3	0.0414656	0.00145801	3	-0.0238128	0.00147789	-0.0957607	0.318691	0.607317	FALSE	None
RNF114	3	-0.237741	0.0951948	3	-0.303282	0.145697	-0.10372	0.375072	0.654271	FALSE	None
RNF115	3	-0.364932	0.174518	3	-0.535872	0.0373535	-0.178252	0.175922	0.457942	FALSE	None
RNF121	3	-0.26385	0.0217522	3	-0.133721	0.00897663	0.107208	0.25051	0.539133	FALSE	None
RNF122	3	-0.00511494	0.0495924	3	0.0461275	0.0267734	0.0401012	0.71607	0.903173	FALSE	None
RNF123	3	-0.330475	0.0849796	3	-0.357297	0.0574205	-0.0456749	0.704168	0.897429	FALSE	None
RNF125	3	0.155258	0.0312556	3	0.0536573	0.0399915	-0.12307	0.27281	0.564796	FALSE	None
RNF126	3	0.228724	0.00514979	3	0.421634	0.0183515	0.209223	0.0356693	0.169934	TRUE	None
RNF128	3	-0.0662851	0.0396266	3	-0.0622073	0.136336	-0.025522	0.844835	0.959823	FALSE	None
RNF13	3	-0.480301	0.0280129	3	-0.113697	0.040042	0.333706	0.0155145	0.101094	TRUE	None
RNF130	3	-0.182353	0.0793773	3	-0.0946665	0.0448803	0.0434222	0.718659	0.903173	FALSE	None
RNF133	3	-0.0129324	0.033807	3	0.0470753	0.0111741	0.0412282	0.694529	0.891192	FALSE	None
RNF135	3	-0.173275	0.0184752	3	0.00160932	0.00144588	0.123114	0.314084	0.606548	FALSE	None
RNF138	3	0.0545778	0.079011	3	-0.0182403	0.078059	-0.0991234	0.286143	0.577662	FALSE	None
RNF139	3	-0.174924	0.0288022	3	-0.228703	0.00943249	-0.0800803	0.353088	0.63682	FALSE	None
RNF14	3	-0.392216	0.0600314	3	-0.366127	0.021061	-0.00644128	0.956693	0.989529	FALSE	None
RNF141	3	-0.125999	0.0341981	3	-0.0786239	0.0864294	0.0101335	0.919344	0.9755	FALSE	None
RNF144B	3	-0.027793	0.172901	3	-0.128132	0.0885386	-0.130358	0.319369	0.607462	FALSE	None
RNF145	3	-0.512731	0.0935292	3	-0.360092	0.106853	0.12288	0.239785	0.532271	FALSE	None
RNF146	3	0.398543	0.0950257	3	0.331779	0.0237324	-0.0254748	0.801784	0.946488	FALSE	None
RNF148	3	-0.22576	0.109226	3	-0.217944	0.0440598	-0.0306959	0.765998	0.930997	FALSE	None
RNF149	3	-0.302174	0.468137	3	-0.457127	0.460848	-0.15913	0.147787	0.421653	FALSE	None
RNF150	3	-0.0522617	0.00629163	3	-0.0204062	0.00740763	-0.00986731	0.918254	0.9755	FALSE	None
RNF151	3	-0.200726	0.020544	3	-0.174235	0.0948637	-0.00249728	0.977935	0.989529	FALSE	None
RNF152	3	0.109918	0.0361487	3	0.045082	0.021559	-0.0989132	0.263127	0.551326	FALSE	None
RNF157	3	0.00531332	0.0204655	3	0.136409	0.0372266	0.0924221	0.474127	0.741777	FALSE	None
RNF165	3	0.244075	0.210283	3	0.0708302	0.0578214	-0.165375	0.205379	0.497245	FALSE	None
RNF166	3	-0.0908435	0.0455756	3	-0.032302	0.0102891	0.0299415	0.843156	0.958995	FALSE	None
RNF167	3	-0.244581	0.0957784	3	-0.0956776	0.00556754	0.129973	0.250884	0.539133	FALSE	None
RNF168	3	-0.663362	0.276763	3	-0.466037	0.0637241	0.170463	0.286543	0.577662	FALSE	None
RNF169	3	-0.0757814	0.0645671	3	-0.164272	0.0368628	-0.110128	0.328216	0.615939	FALSE	None
RNF17	3	-0.0451289	0.0180521	3	-0.255171	0.0093313	-0.228959	0.00835266	0.0632015	TRUE	None
RNF170	3	-0.105736	0.0206111	3	-0.221406	0.019683	-0.14167	0.270212	0.56271	FALSE	None
RNF175	3	-0.206884	0.00575133	3	0.0507734	0.00406516	0.225371	0.0196856	0.116271	TRUE	None
RNF180	3	-0.159308	0.052308	3	-0.21288	0.220651	-0.0685874	0.61546	0.839636	FALSE	None
RNF181	3	-0.0846344	0.0279526	3	-1.11611	0.0775512	-1.06186	0.000133313	0.00415931	TRUE	Negative
RNF182	3	0.0348935	0.000487544	3	0.00494923	0.103486	-0.0545261	0.65624	0.859666	FALSE	None
RNF183	3	-0.284308	0.0117625	3	-0.0182341	0.0240284	0.240894	0.019394	0.115223	TRUE	None
RNF185	3	-0.622219	0.00620974	3	-0.262485	0.00049877	0.326354	0.026068	0.13968	TRUE	None
RNF186	3	-0.236166	0.0868015	3	-0.267682	0.01874	-0.0622245	0.517298	0.775821	FALSE	None
RNF187	3	0.0877419	0.00322027	3	0.0732912	0.0814531	-0.0556126	0.663492	0.864747	FALSE	None
RNF19A	3	-0.217251	0.0022743	3	-0.235764	0.00250125	-0.0491053	0.5317	0.785534	FALSE	None
RNF19B	3	-0.269449	0.128731	3	-0.130262	0.147966	0.10313	0.284195	0.576524	FALSE	None
RNF2	3	0.312776	0.0396623	3	-0.0550607	0.0284316	-0.380484	0.00960796	0.0718818	TRUE	None
RNF207	3	-0.232403	0.0700361	3	-0.129049	0.0418032	0.0703214	0.61004	0.837147	FALSE	None
RNF208	3	-0.140811	0.0116015	3	-0.123532	0.208571	-0.000720285	0.996251	0.998228	FALSE	None
RNF212	3	-0.132761	0.0816787	3	0.0377616	0.00580686	0.136735	0.213784	0.510453	FALSE	None
RNF213	3	-0.218589	0.0188131	3	-0.165837	0.0487428	0.0242889	0.819087	0.953086	FALSE	None
RNF214	3	1.13181	0.0267761	3	0.318846	0.20883	-0.65226	0.00128616	0.0162378	TRUE	None
RNF215	3	-0.303265	0.0229323	3	-0.221927	0.0356493	0.0473815	0.702608	0.897136	FALSE	None
RNF216	3	-0.260228	0.0267723	3	-0.412675	0.0729206	-0.190256	0.139781	0.411599	FALSE	None
RNF217	3	-0.425058	0.0171863	3	-0.602455	0.0983817	-0.200847	0.159579	0.433267	FALSE	None
OBI1	3	0.0170213	0.0334247	3	0.104421	0.0202012	0.0907452	0.443651	0.719242	FALSE	None
RNF220	3	-0.0468727	0.0739815	3	0.0230902	0.12328	0.0617713	0.547675	0.791348	FALSE	None
RNF222	3	-0.159347	0.0562234	3	-0.173923	0.0860572	-0.0601454	0.55665	0.798603	FALSE	None
RNF223	3	-0.297419	0.000841019	3	-0.302473	0.0658432	-0.0317534	0.777179	0.938218	FALSE	None
RNF24	3	0.0911193	0.010896	3	0.223535	0.00999597	0.0820167	0.455985	0.732563	FALSE	None
RNF25	3	-1.1365	0.102916	3	-0.839259	0.123792	0.28411	0.0174289	0.108662	TRUE	None
RNF26	3	0.0351568	0.0388864	3	-0.080964	0.0726606	-0.150077	0.152986	0.425664	FALSE	None
RNF31	3	-1.31944	0.660334	3	-1.47835	0.404615	-0.165138	0.179226	0.458485	FALSE	None
RNF32	3	0.0635444	0.00981826	3	0.0944716	0.0222187	-0.00470889	0.953104	0.989529	FALSE	None
RNF34	3	0.10182	0.00960392	3	0.0735131	0.0678982	-0.0676416	0.543251	0.789473	FALSE	None
RNF38	3	-0.119414	0.117634	3	-0.0157223	0.0564143	0.0652475	0.541624	0.789473	FALSE	None
RNF39	3	-0.383213	0.200626	3	-0.388245	0.0440477	-0.0283251	0.835025	0.956208	FALSE	None
RNF4	3	-1.46026	0.171659	3	-1.5719	0.199201	-0.110252	0.437607	0.713608	FALSE	None
RNF40	3	-2.68869	0.680881	3	-3.06288	1.07167	-0.416286	0.152397	0.425664	FALSE	None
RNF41	3	-0.282722	0.00182732	3	-0.298645	0.00130957	-0.0446792	0.668693	0.866983	FALSE	None
RNF43	3	-0.468095	0.404931	3	-0.405837	0.444819	0.0268971	0.745355	0.91918	FALSE	None
RNF44	3	-0.367603	0.074089	3	0.0300722	0.0267321	0.362459	0.0015143	0.0175798	TRUE	None
RNF5	3	-1.08466	1.58553	3	-0.941272	2.21576	0.109944	0.433813	0.713608	FALSE	None
RNF6	3	0.0930352	0.0432899	3	0.0961222	0.0352181	-0.0309302	0.797542	0.946488	FALSE	None
RNF7	3	0.248565	6.6237	3	-0.0610331	4.39394	-0.0511819	0.70572	0.897704	FALSE	None
RNF8	3	-0.86173	0.765798	3	-1.63605	1.8427	-0.812621	0.000301262	0.00553226	TRUE	Negative
RNH1	3	-0.636718	0.0764731	3	-0.384671	0.0632119	0.222084	0.0513806	0.223683	TRUE	None
ROBO1	3	-0.0640084	0.00404559	3	0.0879849	0.00272691	0.123993	0.235779	0.530372	FALSE	None
ROBO2	3	0.0438675	0.0661538	3	-0.0970043	0.0477041	-0.16762	0.172595	0.457249	FALSE	None
ROCK2	3	0.167416	0.0283047	3	0.374604	0.073403	0.220106	0.06102	0.249515	TRUE	None
ROR2	3	-0.342941	0.539781	3	-0.61869	0.913957	-0.274105	0.0518672	0.224832	TRUE	None
RPA1	3	-3.42596	3.67806	3	-3.48786	3.34166	0.0554875	0.829532	0.955783	FALSE	None
RPA2	3	-2.60897	1.46054	3	-2.74535	1.08299	-0.129517	0.721668	0.904323	FALSE	None
RPA3	3	-2.66409	5.41248	3	-2.6491	5.52869	-0.00845809	0.965788	0.989529	FALSE	None
RPL36	3	-2.5145	1.27678	3	-2.08767	1.09427	0.383568	0.10096	0.343332	FALSE	None
RPP25L	3	-3.70891	2.2788	3	-3.2455	3.15043	0.471983	0.0111965	0.0790804	TRUE	None
RPS25	3	-3.49706	0.937786	3	-3.30615	3.52097	0.165485	0.572725	0.807894	FALSE	None
RPS3	3	-3.78206	2.95786	3	-3.64689	2.01366	0.156031	0.695306	0.891192	FALSE	None
RPS6KB1	3	-0.243251	0.00181143	3	-0.195815	0.00615162	0.0205606	0.859728	0.96667	FALSE	None
RPSA	3	-6.18899	2.32232	3	-5.51253	0.473936	0.911586	0.303166	0.594559	FALSE	None
RPUSD3	3	-0.388953	0.257669	3	-0.528845	0.0787857	-0.17185	0.147429	0.421653	FALSE	None
CNOT9	3	-0.676287	0.0918457	3	-0.935111	0.188538	-0.270057	0.0288714	0.149539	TRUE	None
RRAGA	3	-0.854978	0.25089	3	-1.25919	0.760826	-0.423523	0.0130802	0.0880732	TRUE	None
RUNX1	3	2.50206	0.38688	3	2.36518	0.311432	0.666854	1.87295e-05	0.0011823	TRUE	None
RWDD1	3	-0.402011	0.0123131	3	-0.374492	0.0447461	-0.00428672	0.969068	0.989529	FALSE	None
SAP30	3	0.482482	0.0059158	3	0.670328	0.0354674	0.298881	0.0253522	0.139161	TRUE	None
SART3	3	-4.23351	1.97159	3	-4.24677	4.29948	0.0854494	0.805973	0.946488	FALSE	None
SBDS	3	-4.91676	0.345324	3	-3.9112	0.229137	1.0686	0.0124902	0.0858172	TRUE	Positive
SCAP	3	-3.92691	0.194664	3	-4.47355	1.55009	-0.527662	0.345558	0.628024	FALSE	None
SCAPER	3	-0.287911	0.0566958	3	-0.175173	0.03126	0.0857934	0.351196	0.63464	FALSE	None
SCD	3	-2.7244	1.49057	3	-2.31131	1.23435	0.399356	0.318254	0.607317	FALSE	None
SCNM1	3	-1.34502	3.13688	3	-1.53033	3.10804	-0.235016	0.0808627	0.296987	TRUE	None
SDHB	3	-0.334519	0.0895015	3	-0.0256841	0.0695819	0.264276	0.0247173	0.137604	TRUE	None
SDHD	3	-0.0803873	0.050304	3	-0.201027	0.0182052	-0.14232	0.174748	0.457942	FALSE	None
SDK1	3	0.00651968	0.0299017	3	-0.0329096	0.103505	-0.0762927	0.411475	0.697486	FALSE	None
SEMA3A	3	0.857383	0.0199297	3	0.800449	0.0241646	0.161873	0.096927	0.334117	FALSE	None
SEMA3E	3	-0.0257064	0.0100049	3	0.0041976	0.0945849	-0.00440919	0.961928	0.989529	FALSE	None
SENP1	3	-0.305499	0.0291888	3	-0.110115	0.0288467	0.144361	0.13435	0.400963	FALSE	None
SENP2	3	-0.472676	0.00498342	3	-0.0837034	0.020924	0.360099	0.001006	0.0131956	TRUE	None
SEPHS1	3	-1.69191	0.0779537	3	-1.94818	0.0842297	-0.245343	0.233614	0.530202	FALSE	None
SEPHS2	3	-0.6412	0.322242	3	-0.488092	0.072227	0.127916	0.544083	0.789546	FALSE	None
SEPTIN11	3	0.0993715	0.0186033	3	0.118816	0.0114478	-0.00772193	0.922474	0.975601	FALSE	None
SERPIND1	3	-0.259718	0.0584684	3	-0.461818	0.0355481	-0.233438	0.165832	0.445454	FALSE	None
SETD1B	3	1.44344	0.00294615	3	1.52082	0.0349872	0.516934	9.73479e-05	0.00393285	TRUE	None
SETD2	3	-1.54143	1.37619	3	-1.65396	1.00588	-0.143057	0.281357	0.574192	FALSE	None
KMT5A	3	-0.704676	0.541181	3	-0.674425	0.276597	0.0366096	0.801238	0.946488	FALSE	None
SETDB1	3	0.562242	0.113179	3	0.414793	0.204688	-0.0214195	0.83198	0.955973	FALSE	None
RSKR	3	-0.533583	0.0545237	3	-0.438809	0.0184093	0.0735931	0.651283	0.857621	FALSE	None
SGSM2	3	-0.463381	0.0186511	3	-0.226152	0.0102364	0.202391	0.0552299	0.232426	TRUE	None
SHKBP1	3	0.0771496	0.0353022	3	0.0727051	0.069465	-0.00443782	0.966211	0.989529	FALSE	None
SHMT1	3	0.00243962	0.00407969	3	0.0184902	0.0399912	-0.0278191	0.805361	0.946488	FALSE	None
SHMT2	3	-0.0916298	0.116901	3	-0.111401	0.209555	-0.0236257	0.808802	0.946488	FALSE	None
SHPRH	3	-0.0320646	0.0151292	3	-0.0288779	0.0055565	-0.0375469	0.720589	0.904092	FALSE	None
SIRT6	3	0.417227	0.0192016	3	0.240056	0.0493576	-0.153305	0.219472	0.519127	FALSE	None
SKI	3	-0.389808	0.107854	3	-0.508855	0.0123906	-0.150444	0.177744	0.458485	FALSE	None
SLC16A1	3	-0.0893903	0.0411856	3	0.0299907	0.0179738	0.100193	0.489932	0.755468	FALSE	None
SLC16A10	3	0.0494942	0.00379439	3	0.132037	0.0109135	0.0490011	0.634792	0.850994	FALSE	None
SLC16A3	3	0.141625	0.0274857	3	-0.112118	0.00961949	-0.275046	0.0103935	0.0751964	TRUE	None
SLC1A5	3	-0.267686	0.28698	3	-0.331043	0.335341	-0.0934934	0.300683	0.592528	FALSE	None
SLC20A1	3	-0.261785	0.0320791	3	-0.239416	0.0192411	-0.0200936	0.884228	0.971235	FALSE	None
SLC25A1	3	-0.383225	0.0124835	3	-0.447769	0.0221602	-0.0959519	0.32275	0.61159	FALSE	None
SLC25A28	3	-0.255387	0.0187169	3	-0.453218	0.00803063	-0.237135	0.104324	0.349732	FALSE	None
SLC25A32	3	-0.305899	0.0106422	3	-0.164738	0.0230325	0.111876	0.461234	0.732563	FALSE	None
SLC25A37	3	0.0260383	0.0065489	3	-0.00774428	0.00766326	-0.0446396	0.638457	0.850994	FALSE	None
SLC26A6	3	-0.343514	0.127406	3	-0.348074	0.182408	-0.0370943	0.752519	0.924144	FALSE	None
SLC2A1	3	-0.668609	0.011347	3	-0.791149	0.137506	-0.147076	0.340316	0.62268	FALSE	None
SLC33A1	3	-0.123256	0.0556264	3	0.0701513	0.0781944	0.148338	0.249216	0.538913	FALSE	None
SLC35A1	3	-0.386435	0.0136376	3	-0.234852	0.0254746	0.116794	0.363207	0.649339	FALSE	None
SLC35B2	3	0.272216	0.0099601	3	-0.143275	0.116759	-0.429493	0.00216593	0.0235224	TRUE	None
SLC38A2	3	-0.377451	0.0059311	3	-0.769274	0.00290744	-0.409593	0.000162967	0.00421076	TRUE	None
SLC39A9	3	0.720537	0.135858	3	0.395596	0.264069	-0.210056	0.140356	0.412092	FALSE	None
SLC3A2	3	-0.81206	0.036918	3	-0.628005	0.197147	0.151201	0.294866	0.58625	FALSE	None
SLC4A2	3	0.067329	0.0187405	3	0.164069	0.0294049	0.0850836	0.476549	0.741777	FALSE	None
SLC7A1	3	-0.240932	0.0731012	3	-0.24605	0.190031	-0.0417291	0.731215	0.911686	FALSE	None
SLC7A11	3	-0.464955	0.143673	3	-0.547893	0.268784	-0.11112	0.306086	0.596809	FALSE	None
SLC7A5	3	-0.780079	0.528652	3	-0.608782	0.201905	0.154203	0.343788	0.626761	FALSE	None
GINS4	3	-1.30682	1.46337	3	-1.19797	1.41704	0.0964658	0.49558	0.758515	FALSE	None
SLFN11	3	-0.264687	0.0160506	3	-0.160486	0.17078	0.0714409	0.564721	0.802498	FALSE	None
SLIT2	3	0.107647	0.0774084	3	0.141768	0.0605803	0.000816357	0.995463	0.998228	FALSE	None
SLX1A	3	-0.364646	0.0787873	3	-0.331296	0.0410061	0.00656703	0.96513	0.989529	FALSE	None
SLX4	3	-2.10667	0.198457	3	-1.79515	0.165862	0.30827	0.0784101	0.292229	TRUE	None
SMAD2	3	-0.0291943	0.00730084	3	0.0370984	0.0251336	0.0224904	0.776169	0.938218	FALSE	None
SMAD4	3	-0.87009	0.564401	3	-0.151433	0.10893	0.702232	0.000487881	0.00786697	TRUE	Positive
SMARCA1	3	0.237485	0.0315259	3	0.163137	0.0109626	-0.0345699	0.724816	0.90602	FALSE	None
SMARCA4	3	-0.520041	0.713908	3	0.217987	0.0266333	0.731774	0.00186522	0.0207019	TRUE	Positive
SMARCAL1	3	0.0147567	0.0300277	3	0.0711772	0.0807609	0.0135719	0.91008	0.9755	FALSE	None
SMARCB1	3	-2.32885	2.41771	3	-1.66406	1.31199	0.617229	0.00261952	0.0267243	TRUE	None
SMARCC1	3	-0.500363	0.0694499	3	-0.406327	0.0971493	0.06502	0.592723	0.824587	FALSE	None
SMARCD1	3	0.937823	0.323344	3	0.481287	0.287544	-0.305086	0.0805924	0.296987	TRUE	None
PPP4R3A	3	0.0271484	0.277003	3	0.0254574	0.172382	-0.000350412	0.997676	0.998665	FALSE	None
SNAP23	3	-0.817107	0.0542127	3	-0.766488	0.069684	0.0286227	0.842199	0.958986	FALSE	None
SOD2	3	-0.870857	0.0348333	3	-0.303285	0.0237343	0.544556	0.000965234	0.0129985	TRUE	None
SOX2	3	-0.0239383	0.0987513	3	-0.0999949	0.0468512	-0.102478	0.465945	0.732563	FALSE	None
SOX9	3	-0.323884	0.341285	3	-0.607911	0.297262	-0.308646	0.0548474	0.232426	TRUE	None
SPEN	3	-1.56283	0.239944	3	-0.975393	0.264906	0.584489	0.000637006	0.00960262	TRUE	None
SPOP	3	1.09415	0.145543	3	0.433092	0.0428314	-0.493964	0.00029038	0.00543118	TRUE	None
SPTLC2	3	-2.15994	0.960452	3	-1.35355	0.252274	0.792817	0.000498501	0.00786697	TRUE	Positive
SRM	3	-0.449844	0.0983731	3	-0.398415	0.124067	0.0270195	0.789922	0.944167	FALSE	None
SRPRA	3	-2.08079	3.94319	3	-2.47963	3.79698	-0.400682	0.0305792	0.153656	TRUE	None
SRSF5	3	-0.141583	0.0402046	3	-0.398761	0.00455102	-0.282855	0.023743	0.135489	TRUE	None
NABP2	3	-0.0645783	0.0690561	3	-0.129335	0.0101173	-0.0897914	0.517726	0.775821	FALSE	None
NABP1	3	-0.254736	0.0433712	3	-0.148757	0.0955425	0.0673711	0.460947	0.732563	FALSE	None
SSBP1	3	-0.774853	0.10448	3	-1.24907	0.13843	-0.481737	0.00257103	0.0267243	TRUE	None
SSR3	3	-0.589753	0.0367821	3	-0.49525	0.00637341	0.0668085	0.644016	0.854739	FALSE	None
STAG1	3	0.144452	0.00934248	3	0.0406826	0.094033	-0.126741	0.33235	0.618151	FALSE	None
STAG2	3	1.05994	0.0166866	3	0.637193	0.0217902	-0.214367	0.0309877	0.154938	TRUE	None
STIP1	3	1.43809	0.0449718	3	1.42915	0.0707466	0.420439	0.000887071	0.0122732	TRUE	None
STK11	3	-3.09637	1.57038	3	-3.4335	4.58965	-0.289444	0.558395	0.79997	FALSE	None
STOML2	3	-0.375326	0.0133714	3	-0.467206	0.147126	-0.122258	0.329283	0.615939	FALSE	None
CENPX	3	-0.446041	0.0565089	3	-0.512485	0.0468079	-0.0970853	0.324329	0.613432	FALSE	None
STRAP	3	-4.05828	0.779763	3	-3.61451	0.006826	0.401791	0.255407	0.544703	FALSE	None
STT3A	3	-2.67364	0.408669	3	-1.88989	0.054785	0.770387	0.000191777	0.00421076	TRUE	Positive
STUB1	3	-2.34674	0.105777	3	-1.82315	0.00153854	0.527071	0.0266994	0.141185	TRUE	None
STX4	3	-0.231493	0.0137354	3	-0.0766622	0.00528438	0.127207	0.20184	0.496006	FALSE	None
SUMO1	3	-0.517455	0.955942	3	-0.67603	1.72636	-0.171386	0.392388	0.674	FALSE	None
SUMO2	3	-0.655987	0.0326638	3	-0.334276	0.0185504	0.286218	0.00348136	0.0328615	TRUE	None
SUMO3	3	0.0322102	0.0900193	3	-0.0860899	0.0942459	-0.134991	0.130405	0.391913	FALSE	None
SUPT20H	3	0.103396	0.0990053	3	0.0427969	0.0801508	-0.0461974	0.718961	0.903173	FALSE	None
SURF1	3	-0.308494	0.0067919	3	-0.287146	0.0280696	-0.0154181	0.881455	0.971235	FALSE	None
SUV39H1	3	-0.964381	0.158607	3	-0.617429	0.0921552	0.311808	0.00793012	0.0620886	TRUE	None
SUZ12	3	0.206341	0.00380226	3	-0.30121	0.0171822	-0.511915	3.88789e-05	0.00199523	TRUE	None
SYVN1	3	-0.625898	0.0318876	3	-1.20514	0.708954	-0.578102	0.0353115	0.169131	TRUE	None
TACO1	3	-0.22558	0.0673039	3	-0.070352	0.0692198	0.122374	0.268669	0.560653	FALSE	None
TADA1	3	-0.188666	0.0978502	3	0.135538	0.0804482	0.310053	0.0109199	0.0776695	TRUE	None
TADA2B	3	-0.342429	0.0550894	3	-0.300366	0.0264701	-0.00649951	0.94958	0.989529	FALSE	None
TAF4	3	-1.32598	0.240675	3	-1.4507	0.472164	-0.127896	0.422664	0.70903	FALSE	None
TAF5L	3	0.132862	0.0201445	3	0.341792	0.0532602	0.20742	0.0832984	0.302339	FALSE	None
TANK	3	-0.613494	0.368846	3	-0.503257	0.386017	0.0845949	0.570872	0.806407	FALSE	None
TAOK1	3	2.4205	0.0327303	3	1.63765	0.0332019	-0.163151	0.121161	0.381221	FALSE	None
TAPT1	3	-0.793619	0.012227	3	-1.02632	0.199751	-0.235457	0.101632	0.343635	FALSE	None
WWTR1	3	-0.470371	0.118576	3	-0.0442172	0.0450427	0.397526	0.0116066	0.0814073	TRUE	None
TEAD4	3	-0.800847	0.0091972	3	-0.667043	0.0190919	0.106792	0.231455	0.529337	FALSE	None
TECR	3	-1.04123	0.598311	3	-0.914994	0.564596	0.116651	0.365837	0.649339	FALSE	None
TELO2	3	-3.00015	1.30446	3	-3.82409	4.27406	-0.773771	0.0933119	0.326107	FALSE	None
TEN1	3	-1.30733	0.106893	3	-1.06355	0.114358	0.242046	0.0568234	0.235212	TRUE	None
TERT	3	-0.354466	0.0732194	3	-0.248918	0.0548929	0.0777671	0.568583	0.804298	FALSE	None
TET2	3	-0.0836704	0.00312642	3	-0.0613184	0.0017366	-0.0111669	0.912055	0.9755	FALSE	None
TFAP4	3	-0.382907	2.16968	3	-0.531025	3.31992	-0.107343	0.49424	0.758515	FALSE	None
TFDP1	3	-1.06049	0.415226	3	-1.29387	0.557681	-0.246234	0.107331	0.353908	FALSE	None
TFPT	3	-1.03618	0.0320824	3	-0.646432	0.0534599	0.365594	0.00482112	0.0430914	TRUE	None
TFRC	3	-0.217903	0.0180451	3	-0.0924232	0.125446	0.0789617	0.448615	0.724296	FALSE	None
TGFBR2	3	-0.434923	0.0135605	3	0.160862	0.0496922	0.554362	0.000539051	0.00837602	TRUE	None
TGIF2	3	-0.483774	0.0062133	3	-0.193756	0.0420481	0.256345	0.0567317	0.235212	TRUE	None
THAP10	3	-0.125096	0.0643022	3	-0.209401	0.147192	-0.114498	0.314701	0.60658	FALSE	None
THAP3	3	-0.112285	0.0869728	3	-0.0177448	0.108058	0.0753337	0.474652	0.741777	FALSE	None
TIMM17A	3	-1.06529	0.0714316	3	-0.798055	0.0769827	0.258216	0.00718606	0.0576026	TRUE	None
TIMM8A	3	-0.749457	0.21343	3	-0.562612	0.0964746	0.162142	0.173392	0.457249	FALSE	None
TIMM8B	3	-0.663881	0.139651	3	-0.673243	0.326051	-0.0412374	0.823272	0.954443	FALSE	None
TIMMDC1	3	-0.220901	0.0665268	3	-0.331242	0.0843459	-0.136631	0.36524	0.649339	FALSE	None
TINF2	3	-1.60637	1.53417	3	-1.60699	2.01242	-0.0387164	0.780791	0.941049	FALSE	None
TIPARP	3	-3.50686	0.720539	3	-3.78502	1.17815	-0.221677	0.624147	0.845025	FALSE	None
TIPIN	3	-2.86346	7.87512	3	-2.669	5.1822	0.175372	0.656096	0.859666	FALSE	None
TIPRL	3	-0.860821	0.0776299	3	-0.209913	0.117159	0.626326	0.000127838	0.00415931	TRUE	None
TKT	3	-0.853549	0.0436919	3	-0.487568	0.107052	0.338334	0.0127533	0.0864485	TRUE	None
TLCD1	3	-0.624925	0.0166813	3	-0.72028	0.0910597	-0.119159	0.374354	0.654271	FALSE	None
TM2D1	3	-0.483564	0.0193061	3	-0.305514	0.00250427	0.140728	0.178977	0.458485	FALSE	None
TM2D2	3	-0.569177	0.0326946	3	-0.349989	0.0193239	0.181285	0.113787	0.366003	FALSE	None
TM2D3	3	-0.697148	0.00971142	3	-0.529537	0.0510701	0.128856	0.16879	0.451482	FALSE	None
TMCO1	3	-0.126981	0.0104915	3	-0.579546	0.0192509	-0.48078	0.000351187	0.00630274	TRUE	None
TMEM165	3	0.141042	0.0366022	3	0.000224631	0.00268896	-0.170878	0.0981155	0.335921	FALSE	None
TMEM208	3	0.135416	0.0819907	3	-0.417022	0.00352589	-0.580385	0.000355699	0.00630274	TRUE	None
TNKS	3	-0.718894	0.0220821	3	-0.48332	0.00982582	0.202752	0.12907	0.391474	FALSE	None
TNPO1	3	-3.37045	0.0269887	3	-3.36087	0.307711	-0.0690952	0.767386	0.931556	FALSE	None
TOMM70	3	-2.15593	0.4888	3	-1.88624	0.302135	0.262767	0.031389	0.156172	TRUE	None
TOPBP1	3	-4.98864	2.22762	3	-4.21239	2.20091	0.765866	0.197802	0.491683	FALSE	None
TP53	3	-0.724465	1.30941	3	-0.485315	1.11224	0.223118	0.0950495	0.329897	FALSE	None
TP53BP1	3	-0.624087	0.094862	3	-0.598152	0.0857008	-0.00637894	0.960826	0.989529	FALSE	None
TP73	3	0.0179135	0.0221173	3	0.131729	0.0366594	0.0796798	0.43212	0.713608	FALSE	None
TPGS1	3	-0.0707997	0.0422902	3	-0.0853397	0.0739682	-0.0260372	0.851412	0.96337	FALSE	None
TPP1	3	-0.267843	0.142911	3	-0.14611	0.0754922	0.0889145	0.455755	0.732563	FALSE	None
TPT1	3	-4.01928	0.179875	3	-4.23867	0.662814	-0.19844	0.645644	0.855775	FALSE	None
TREX1	3	-0.455744	0.0721161	3	-0.226699	0.184347	0.190687	0.134581	0.400963	FALSE	None
TERF1	3	-0.460001	0.11426	3	-0.423249	0.132565	0.0180086	0.899055	0.9755	FALSE	None
TERF2	3	-3.81503	2.64142	3	-3.56838	2.83981	0.403906	0.239149	0.532027	FALSE	None
TRIM28	3	-0.72747	0.136036	3	-0.558986	0.0656345	0.146592	0.459663	0.732563	FALSE	None
TRIM37	3	-1.14379	0.0918924	3	-1.22952	0.264201	-0.0912464	0.400678	0.682942	FALSE	None
TRIM71	3	-0.21183	0.04419	3	-0.215741	0.137633	-0.0451528	0.683082	0.882242	FALSE	None
TRUB2	3	-1.02842	0.116857	3	-1.47551	0.168717	-0.446355	0.00363755	0.0340178	TRUE	None
TSC1	3	1.89896	0.207223	3	1.70687	0.255563	0.347007	0.00582426	0.0494328	TRUE	None
TSC2	3	2.31399	0.0184362	3	1.93726	0.0149364	0.281308	0.0134989	0.0901876	TRUE	None
TSPYL2	3	-0.138303	0.043441	3	-0.0682429	0.00266177	0.060457	0.555194	0.797647	FALSE	None
EIPR1	3	-2.23787	0.333066	3	-1.60833	0.276715	0.627487	0.000495181	0.00786697	TRUE	None
TTC4	3	-2.27479	0.972816	3	-2.20957	1.33173	0.0270318	0.874758	0.968491	FALSE	None
TUB	3	-0.258492	0.0728195	3	-0.065526	0.130021	0.150743	0.193777	0.486852	FALSE	None
TXNDC17	3	-0.50243	0.089627	3	-0.87853	0.0846805	-0.401587	0.000912941	0.0124604	TRUE	None
TYRO3	3	-0.324016	0.177156	3	-0.47159	0.229962	-0.164245	0.154909	0.428652	FALSE	None
UBA5	3	-0.822485	0.0404557	3	-0.591523	0.0459007	0.203431	0.208621	0.501683	FALSE	None
UBE2C	3	-1.31733	0.374092	3	-2.4047	0.198415	-1.0843	0.000117685	0.00415931	TRUE	Negative
UBE2G2	3	-1.22993	0.0983021	3	-1.0708	0.0884758	0.153346	0.311682	0.605383	FALSE	None
UBE2H	3	-0.61276	0.00552318	3	-0.760768	0.00704068	-0.173453	0.112588	0.364467	FALSE	None
UBE2I	3	-5.09292	0.655009	3	-4.6367	0.321519	0.480233	0.241779	0.534347	FALSE	None
UBE2J2	3	-0.697871	0.00262619	3	-0.705321	0.00942787	-0.0372507	0.762646	0.928482	FALSE	None
UBE2K	3	0.390213	0.0291697	3	-0.0637112	0.156945	-0.479461	0.0101185	0.0740557	TRUE	None
UBE2T	3	-1.56663	0.0299077	3	-1.03406	0.0940458	0.533699	6.38518e-05	0.00307097	TRUE	None
UBE2V2	3	-0.549646	0.00213899	3	-0.176624	0.00473586	0.342693	0.00163753	0.0187944	TRUE	None
UCHL5	3	-1.20297	0.378091	3	-1.03941	0.418385	0.156397	0.298196	0.591705	FALSE	None
UCK1	3	-0.300557	0.0910106	3	-0.264798	0.174111	0.021728	0.879477	0.971235	FALSE	None
UFSP2	3	-1.03075	0.0528111	3	-0.834976	0.0126443	0.187024	0.232174	0.529337	FALSE	None
UGP2	3	-0.398659	0.0156829	3	-0.719313	0.184152	-0.342391	0.0239208	0.13573	TRUE	None
UNG	3	-0.145665	0.0588247	3	-0.0782854	0.153254	0.0341068	0.742968	0.917357	FALSE	None
UPF3A	3	-0.72378	0.394475	3	-0.661151	0.244173	0.0431171	0.65836	0.861325	FALSE	None
UROS	3	-0.0684826	0.0351491	3	-0.232357	0.00887438	-0.187369	0.0721928	0.278301	TRUE	None
USP1	3	-1.10309	0.0415711	3	-1.11784	0.00180688	-0.0053761	0.963925	0.989529	FALSE	None
USP10	3	-1.32517	0.0979314	3	-1.66927	0.00630134	-0.335583	0.0212026	0.123073	TRUE	None
USP14	3	0.194499	0.0228046	3	0.267514	0.0242545	0.10217	0.44892	0.724296	FALSE	None
USP15	3	-1.03161	4.63447	3	-0.834334	4.27756	0.190143	0.284266	0.576524	FALSE	None
USP2	3	-0.189057	0.00298716	3	-0.140316	0.0727302	0.0126663	0.917339	0.9755	FALSE	None
USP28	3	-0.120491	0.0124423	3	0.107037	0.0297466	0.217113	0.0496027	0.21782	TRUE	None
USP30	3	-0.369843	0.0455661	3	-0.252162	0.0354158	0.085088	0.435385	0.713608	FALSE	None
USP33	3	0.00534207	0.0210153	3	-0.454065	0.00553879	-0.492988	0.000847396	0.0120134	TRUE	None
USP36	3	-1.74715	1.44018	3	-1.85957	0.858165	-0.137654	0.527287	0.784329	FALSE	None
USP7	3	0.729371	0.0565507	3	0.0998555	0.110381	-0.567127	0.00180928	0.0203042	TRUE	None
USP9X	3	-0.21691	0.00738516	3	-0.150143	0.0252012	0.0385752	0.751744	0.924144	FALSE	None
UXS1	3	-0.184263	0.00474534	3	0.259267	0.0163058	0.424513	0.000190141	0.00421076	TRUE	None
VAC14	3	-0.528601	0.0337667	3	-0.582183	0.0441074	-0.085959	0.464319	0.732563	FALSE	None
VAMP2	3	-0.351117	0.0943225	3	-0.359388	0.00115739	-0.0252253	0.840625	0.958275	FALSE	None
VDAC1	3	-0.676117	0.0144202	3	-0.396073	0.0106259	0.243818	0.0332016	0.162784	TRUE	None
VHL	3	-4.34427	0.142084	3	-5.07007	1.36224	-0.546092	0.0166226	0.10493	TRUE	None
VIM	3	-0.0191816	0.0779173	3	0.124203	0.0726771	0.0907376	0.495633	0.758515	FALSE	None
VKORC1L1	3	-0.38205	0.0313607	3	-0.309249	0.00636476	0.0426438	0.688242	0.887684	FALSE	None
VMP1	3	-4.40471	2.58077	3	-4.63822	2.10789	-0.209127	0.631366	0.849847	FALSE	None
VPS16	3	-1.19927	0.16451	3	-1.96223	2.07834	-0.772888	0.0471249	0.209675	TRUE	Negative
VPS18	3	-1.13758	0.0396418	3	-2.2578	0.0679896	-1.12293	2.31749e-07	6.18623e-05	TRUE	Negative
VPS45	3	-2.59413	0.124352	3	-2.75366	0.814502	-0.196743	0.325554	0.613497	FALSE	None
WDHD1	3	-3.00804	1.39929	3	-4.00448	2.45623	-0.991489	0.00244446	0.0257178	TRUE	Negative
WDR1	3	-3.8161	0.376408	3	-3.82012	0.604642	-0.0418335	0.883065	0.971235	FALSE	None
WDR24	3	-2.81059	0.616466	3	-2.99656	1.2055	-0.221105	0.225362	0.524762	FALSE	None
WDR33	3	-4.77732	0.0427603	3	-5.71134	1.75132	-0.768843	0.151758	0.425664	FALSE	None
WDR73	3	-4.2504	0.593172	3	-3.62739	0.46556	0.603642	0.0168778	0.105879	TRUE	None
WDR83OS	3	-0.158292	0.00978708	3	-0.442388	0.0116311	-0.315775	0.0529831	0.227715	TRUE	None
WEE1	3	-2.65611	1.91521	3	-2.77193	2.39755	-0.172604	0.438294	0.713608	FALSE	None
WIPF1	3	-0.827635	0.528222	3	-0.556121	0.159401	0.245017	0.0967124	0.334117	FALSE	None
WNK3	3	-0.0932796	0.00577368	3	0.0153754	0.0176952	0.0878051	0.325578	0.613497	FALSE	None
WRN	3	-0.0384678	0.0191177	3	0.0846927	0.0116489	0.102461	0.399118	0.68208	FALSE	None
WSB2	3	-0.482892	0.00641834	3	-0.526576	0.103685	-0.0737749	0.508607	0.767852	FALSE	None
WT1	3	-0.179881	0.0807165	3	-0.0461788	0.131726	0.0913088	0.421076	0.707632	FALSE	None
WWP1	3	-0.181131	0.208445	3	-0.223501	0.368479	-0.0617431	0.623826	0.845025	FALSE	None
XBP1	3	-0.564164	0.0230137	3	-0.41907	0.00238973	0.11488	0.4671	0.732563	FALSE	None
XPA	3	-0.426066	0.0668941	3	-0.276979	0.0217034	0.112943	0.436445	0.713608	FALSE	None
XPC	3	-0.365243	0.0579741	3	-0.315057	0.00167316	0.0193516	0.85837	0.96667	FALSE	None
XPNPEP3	3	-0.322834	0.0347391	3	-0.193099	0.0692169	0.0920977	0.368043	0.649339	FALSE	None
XPOT	3	-1.68245	0.213706	3	-1.64721	0.576687	0.0245063	0.902124	0.9755	FALSE	None
XRCC1	3	-0.654713	0.0460879	3	-0.475052	0.110933	0.149114	0.25584	0.544703	FALSE	None
XRCC2	3	-1.54442	2.47881	3	-1.51772	2.12668	-0.00215547	0.99091	0.99485	FALSE	None
XRCC3	3	-3.51001	5.74027	3	-3.24828	5.64577	0.368005	0.220656	0.519494	FALSE	None
XRCC4	3	-1.13219	0.336469	3	-0.678187	0.156215	0.431944	0.00992936	0.0737401	TRUE	None
XRCC5	3	-3.32135	0.670611	3	-3.35293	0.385149	-0.0840345	0.635396	0.850994	FALSE	None
XRCC6	3	-2.61113	2.76078	3	-2.65027	2.74896	-0.0702959	0.630521	0.849847	FALSE	None
ATP23	3	-0.260795	0.0618032	3	-0.365746	0.18247	-0.152315	0.162302	0.439478	FALSE	None
YBEY	3	-0.418181	0.0783815	3	-0.31748	0.0538737	0.0717797	0.496285	0.758515	FALSE	None
YPEL5	3	-1.51245	0.0340421	3	-1.68589	0.0887286	-0.151821	0.313401	0.606389	FALSE	None
YWHAQ	3	-0.0347462	0.00940539	3	0.163937	0.00473628	0.184759	0.0422125	0.192048	TRUE	None
ZBTB11	3	-2.71904	1.97506	3	-2.91838	1.44267	-0.229309	0.237983	0.530602	FALSE	None
ZBTB2	3	-1.50486	0.326679	3	-1.50909	0.149492	-0.00542823	0.963692	0.989529	FALSE	None
ZBTB45	3	-0.242136	0.246675	3	-0.478324	0.581712	-0.249809	0.0894893	0.316101	FALSE	None
ZBTB7A	3	1.95459	0.328769	3	1.14582	0.216531	-0.359224	0.00147532	0.0173265	TRUE	None
ZDHHC5	3	-0.298426	0.00455144	3	-0.424689	0.113762	-0.156572	0.18524	0.470514	FALSE	None
ZFP36L2	3	-1.05861	0.0751754	3	-0.463558	0.0420515	0.571775	0.000211234	0.0043291	TRUE	None
RBSN	3	-3.16828	2.27236	3	-2.81535	2.84458	0.315694	0.0749346	0.286473	TRUE	None
ZMYND8	3	-1.24571	0.967244	3	-1.25348	0.989431	-0.00391148	0.97268	0.989529	FALSE	None
ZNF217	3	0.0432181	0.0505366	3	0.188156	0.0439184	0.112862	0.300914	0.592528	FALSE	None
ZNF281	3	-0.524101	0.0097719	3	-0.0423363	0.0203184	0.445066	0.00336731	0.0323903	TRUE	None
ZNF512	3	0.038286	0.0617398	3	0.0787951	0.00865734	0.0110794	0.915693	0.9755	FALSE	None
ZNF689	3	-0.278468	0.0271664	3	-0.244068	0.0133725	0.00266163	0.983715	0.990259	FALSE	None
ZRSR2	3	-0.0132561	0.0516221	3	-0.254272	0.0215458	-0.267971	0.0479381	0.211611	TRUE	None
ZSCAN2	3	-0.304261	0.147321	3	-0.148206	0.211987	0.157997	0.273608	0.565121	FALSE	None
ZSWIM6	3	0.670285	0.0388273	3	0.469874	0.0697296	-0.109086	0.31303	0.606389	FALSE	None

## Sheet: HU_T6
gene	n_WT_T6_UT	mean_WT_T6_UT	variance_WT_T6_UT	n_WT_T6_HU	mean_WT_T6_HU	variance_WT_T6_HU	differential_WT_T6_HU_vs_WT_T6_UT	pval_WT_T6_HU_vs_WT_T6_UT	fdr_WT_T6_HU_vs_WT_T6_UT	significant_WT_T6_HU_vs_WT_T6_UT	effect_type_WT_T6_HU
A1BG	3	-0.126931	0.0145815	3	-0.121146	0.0192073	-0.0831612	0.170553	0.526784	FALSE	None
ABCC1	3	0.209044	0.00283521	3	0.266022	0.00443776	0.0227842	0.6842	0.889962	FALSE	None
ACACA	3	-0.493717	0.0340856	3	-0.28295	0.0354902	0.0807444	0.124569	0.459178	FALSE	None
ACO2	3	-0.184775	0.0878125	3	-0.0762522	0.0380183	0.0220554	0.715771	0.902279	FALSE	None
ACTB	3	0.296286	0.0940144	3	0.311088	0.0629834	-0.0233621	0.691657	0.891728	FALSE	None
ACTG1	3	0.229013	0.0273795	3	0.39851	0.0213893	0.142926	0.0122236	0.131339	TRUE	None
ACTR1A	3	-0.813342	0.118452	3	-0.540594	0.0864854	0.101709	0.158628	0.515158	FALSE	None
ACTR1B	3	-0.651269	0.280554	3	-0.570899	0.4768	-0.0752359	0.326147	0.684814	FALSE	None
AGK	3	-0.100392	0.0229064	3	0.0625377	0.0190914	0.0893138	0.222622	0.582508	FALSE	None
AHCYL1	3	-0.282768	0.0142661	3	-0.311264	0.0224903	-0.140614	0.0116039	0.126021	TRUE	None
AKIRIN1	3	-0.335595	0.0127015	3	-0.276112	0.00447324	-0.0513505	0.428794	0.757137	FALSE	None
AKT1	3	-0.126226	0.0157165	3	-0.0135695	0.00177057	0.0287854	0.596129	0.856269	FALSE	None
AKT3	3	-0.0774375	0.00465498	3	0.00140859	0.0036594	0.00435125	0.948922	0.975792	FALSE	None
ALDH18A1	3	-0.189615	0.0136545	3	-0.0316006	0.00937248	0.0666162	0.335488	0.686834	FALSE	None
ALG12	3	-0.358744	0.0656136	3	-0.191221	0.00945011	0.0567872	0.35623	0.705475	FALSE	None
ALG6	3	-0.547977	0.000709303	3	-0.238219	0.0218984	0.176633	0.0161086	0.15495	TRUE	None
ALG8	3	-0.379621	0.00112707	3	-0.252726	0.000338189	0.0169249	0.786368	0.930998	FALSE	None
ALG9	3	-0.203096	0.00120533	3	-0.127937	0.00310621	-0.0216499	0.713158	0.901489	FALSE	None
ALK	3	-0.615659	1.06273	3	-0.379513	0.375902	0.100688	0.32394	0.681623	FALSE	None
ALKBH1	3	-0.0890608	0.00245702	3	-0.0943417	0.01888	-0.0906681	0.160584	0.51653	FALSE	None
AMOT	3	-0.15355	0.0377852	3	0.0130591	0.0119952	0.0828096	0.206923	0.56946	FALSE	None
ANAPC5	3	-1.80022	1.70159	3	-1.5771	1.51815	-0.0342747	0.622942	0.86695	FALSE	None
ANKDD1A	3	-0.0958215	0.00678993	3	-0.0512994	0.0142139	-0.0384694	0.53782	0.824783	FALSE	None
ANKRD11	3	-0.578388	0.117398	3	-0.450364	0.0883633	-0.0275082	0.68113	0.888956	FALSE	None
ANP32B	3	-0.292136	0.0658073	3	-0.145116	0.0589156	0.040878	0.447111	0.771102	FALSE	None
AP2S1	3	-0.717747	0.0116602	3	-0.746376	0.0121964	-0.213853	0.00854996	0.102803	TRUE	None
APC	3	0.124094	0.00441537	3	0.110107	0.00403424	-0.0612315	0.255193	0.626549	FALSE	None
APC2	3	-0.12428	0.00219644	3	0.0895027	0.00365903	0.145147	0.0363158	0.236639	TRUE	None
APEX1	3	-0.124755	0.00342127	3	-0.109334	0.00866373	-0.0776248	0.219509	0.577355	FALSE	None
ARF1	3	-0.716028	0.0814309	3	-0.621534	0.0314742	-0.0792287	0.28013	0.637234	FALSE	None
ARF4	3	-3.3291	0.0272338	3	-2.72885	0.0139504	0.222848	0.0626326	0.309866	FALSE	None
ARGLU1	3	-0.579106	0.0590135	3	-0.373825	0.00689587	0.0632519	0.268577	0.635647	FALSE	None
ARHGAP5	3	-0.589076	0.108675	3	-0.422097	0.0779491	0.0204267	0.72361	0.902279	FALSE	None
ARID1A	3	-0.233031	0.0142473	3	-0.283177	0.00529049	-0.162147	0.0138941	0.14033	TRUE	None
ARID1B	3	-0.275382	0.00939801	3	-0.268156	0.0212193	-0.107646	0.106335	0.415634	FALSE	None
ARID2	3	-0.361841	0.000717847	3	0.0847538	0.000838704	0.352741	9.16341e-06	0.0011179	TRUE	None
ARID3B	3	-0.297301	0.0432939	3	-0.245437	0.0100055	-0.0573642	0.32697	0.684814	FALSE	None
ASNS	3	-0.178804	0.00267618	3	-0.0775452	0.0160388	0.00641319	0.920651	0.973037	FALSE	None
ATAD3A	3	-0.153604	0.0122016	3	-0.0406248	0.00106617	0.0290558	0.589465	0.856269	FALSE	None
ATAD5	3	-0.751192	0.0083682	3	-0.251335	0.00636525	0.348991	3.03523e-05	0.0027869	TRUE	None
ATG9A	3	0.141083	0.0387298	3	0.155846	0.0604352	-0.0333633	0.528456	0.821139	FALSE	None
ATM	3	-0.228191	0.00230053	3	-0.310904	0.0183672	-0.192841	0.0145054	0.143632	TRUE	None
ATP2B1	3	-0.136425	0.00312037	3	0.0503752	0.00056906	0.112012	0.0904335	0.375295	FALSE	None
ATP2C1	3	-0.158114	0.0100669	3	0.0597487	0.000385257	0.139329	0.0452136	0.263493	TRUE	None
ATP9A	3	-0.0779052	0.00661866	3	-0.0248273	0.00350065	-0.0269349	0.589343	0.856269	FALSE	None
ATP9B	3	0.0208136	0.0121007	3	0.0588423	0.00979258	-0.0213091	0.698241	0.893819	FALSE	None
ATR	3	-2.02095	1.01903	3	-2.7161	1.41231	-1.02251	6.48091e-07	0.000130914	TRUE	Negative
ATRIP	3	-1.09201	0.125731	3	-1.53047	0.0441167	-0.689751	5.18901e-06	0.000873484	TRUE	None
ATRX	3	-1.40407	0.00823245	3	-1.56484	0.0335844	-0.440351	7.00396e-06	0.00101057	TRUE	None
AUP1	3	-0.950201	0.334486	3	-0.804741	0.340827	-0.04986	0.554505	0.835708	FALSE	None
B3GNT2	3	-0.312313	0.0103091	3	-0.320942	0.0045951	-0.125975	0.068421	0.326215	FALSE	None
BABAM1	3	0.116524	0.000164377	3	0.152716	0.0129469	-0.0064717	0.915206	0.973037	FALSE	None
BAK1	3	-0.748519	0.0579865	3	-0.728382	0.0510649	-0.162943	0.0128643	0.135344	TRUE	None
BAP1	3	-1.58252	0.110092	3	-1.13286	0.0304984	0.189568	0.00845869	0.102803	TRUE	None
BARD1	3	-1.26551	0.0363343	3	-1.06551	0.0300397	-0.030342	0.636916	0.872558	FALSE	None
BAX	3	-0.0686208	0.0363678	3	0.0155914	0.00728338	0.0123691	0.851556	0.953678	FALSE	None
BCL2	3	0.00153597	0.00249579	3	0.140567	0.00596436	0.0850449	0.146266	0.497402	FALSE	None
BCL2L2	3	-0.0915584	0.0639091	3	-0.149529	0.0403902	-0.139618	0.0246774	0.203274	TRUE	None
BIRC6	3	-1.04552	0.0260861	3	-0.776158	0.0236476	0.0688517	0.211192	0.572173	FALSE	None
BLM	3	-0.179099	0.0464659	3	-0.272466	0.0648329	-0.196138	0.00124029	0.0338565	TRUE	None
BMI1	3	0.0576662	0.00406021	3	0.0862505	0.000595445	-0.0239175	0.692856	0.891728	FALSE	None
BMPR1A	3	-0.245806	0.0210031	3	-0.0647649	0.0336738	0.08614	0.216673	0.57541	FALSE	None
BOLA3	3	-0.203363	0.00303037	3	-0.138588	0.0452407	-0.0304724	0.646982	0.875941	FALSE	None
BPTF	3	-0.671439	0.0130366	3	-0.534117	0.0282234	-0.0283721	0.742375	0.911064	FALSE	None
BRAF	3	-0.0976377	0.00394997	3	-0.117249	0.0437851	-0.106986	0.102565	0.411072	FALSE	None
BRCA1	3	-0.930007	0.105863	3	-0.689338	0.00525252	0.0458356	0.592766	0.856269	FALSE	None
BRCA2	3	-0.754355	0.0538384	3	-0.584288	0.0512954	-0.00164491	0.979031	0.989378	FALSE	None
BRD1	3	0.108762	0.0047143	3	0.24416	0.0339974	0.0995697	0.152555	0.509743	FALSE	None
BRD4	3	-0.914186	0.118391	3	-0.69809	0.0755319	0.0270401	0.757236	0.922568	FALSE	None
BRD7	3	-0.404995	0.0281534	3	-0.152133	0.00126444	0.144833	0.0298261	0.213648	TRUE	None
BRINP3	3	0.00629554	0.0229353	3	0.0286022	0.0142129	-0.0420905	0.437533	0.765873	FALSE	None
BRIP1	3	-0.532178	0.0669224	3	-0.196575	0.0181681	0.208697	0.00146145	0.0378479	TRUE	None
BRMS1	3	0.0206003	0.0542007	3	-0.12229	0.00128445	-0.21904	0.0109	0.12285	TRUE	None
BRPF1	3	-0.410059	0.0587729	3	-0.385247	0.00708837	-0.101757	0.117256	0.439725	FALSE	None
EMSY	3	-0.212194	0.00530711	3	-0.27438	0.0334963	-0.163465	0.0248081	0.203274	TRUE	None
MTRFR	3	-0.132046	0.0152868	3	-0.00542855	0.00824208	0.0494548	0.467938	0.78123	FALSE	None
C19orf53	3	-1.19603	0.16986	3	-0.665598	0.0531483	0.327203	0.00195064	0.0428292	TRUE	None
C1orf115	3	-0.0163289	0.0268975	3	0.0526041	0.00693095	0.00844465	0.893403	0.965096	FALSE	None
C22orf39	3	-0.2473	0.0239635	3	-0.0614669	0.00886876	0.0905152	0.170491	0.526784	FALSE	None
C6orf136	3	-0.221563	0.0525422	3	-0.179763	3.53313e-05	-0.0571367	0.425097	0.755895	FALSE	None
C7orf26	3	-0.705019	0.0206038	3	-0.493034	0.0219583	0.0444082	0.558159	0.83641	FALSE	None
FMC1-LUC7L2	3	-0.305344	0.00124786	3	-0.295915	0.0268838	-0.111529	0.108635	0.41931	FALSE	None
PAXX	3	-0.0518488	0.0127658	3	-0.0190733	0.00877673	-0.0436888	0.401267	0.739199	FALSE	None
CAB39	3	0.0798799	0.0672736	3	0.0362385	0.0559071	-0.105035	0.128328	0.464556	FALSE	None
CABIN1	3	-0.385453	0.0269476	3	-0.299702	0.000114151	-0.0319235	0.617966	0.863272	FALSE	None
CAP1	3	-0.411779	0.000693851	3	-0.381112	0.0163258	-0.098546	0.169626	0.526784	FALSE	None
CBS	3	-0.00502228	0.0023699	3	0.00678418	0.0101012	-0.0513418	0.527111	0.820312	FALSE	None
CCAR2	3	-0.480999	0.190648	3	-0.381735	0.103063	-0.040951	0.438611	0.766431	FALSE	None
SGF29	3	-0.622632	0.0161513	3	-0.472391	0.0412794	-0.00682611	0.913666	0.973037	FALSE	None
CCDC51	3	-0.252706	0.0224173	3	-0.0411532	0.0282955	0.120464	0.0841372	0.358022	FALSE	None
CCNA2	3	-2.74208	0.345548	3	-2.02927	0.243137	0.348284	0.0487763	0.27072	TRUE	None
CCNC	3	0.186487	0.000643766	3	0.389114	0.00152363	0.182062	0.0224495	0.198909	TRUE	None
CCND1	3	-2.22914	0.598854	3	-1.90127	0.310028	-0.0128463	0.925187	0.973037	FALSE	None
CCND3	3	-0.3747	0.00145446	3	-0.2369	0.0193872	0.0247031	0.710166	0.899191	FALSE	None
CCNE1	3	-0.00748483	0.000975952	3	0.0875541	0.000764897	0.0376778	0.516446	0.811214	FALSE	None
CCNO	3	-0.232795	0.0127541	3	-0.132477	0.00702957	0.00322092	0.966999	0.982565	FALSE	None
CCS	3	-0.0794029	0.0232498	3	-0.286127	0.0156764	-0.302713	0.00018855	0.0116896	TRUE	None
CD44	3	-0.385858	0.0493385	3	-0.24976	0.0176031	0.0222715	0.710373	0.899191	FALSE	None
CD46	3	0.0316299	0.0210884	3	0.034305	0.00766422	-0.0574919	0.283561	0.63775	FALSE	None
CD55	3	-0.086371	0.0408969	3	0.0878249	0.000370799	0.105193	0.131008	0.467556	FALSE	None
CD59	3	-0.122632	0.00188888	3	-0.119538	0.0178054	-0.0815543	0.213007	0.572173	FALSE	None
CDC25A	3	-0.208848	0.0851424	3	0.0360561	0.0586524	0.16442	0.0234824	0.203274	TRUE	None
CDC40	3	-2.44889	0.264865	3	-2.04259	0.118854	0.0428005	0.722181	0.902279	FALSE	None
CDC42	3	-1.77064	0.882597	3	-1.33034	0.594355	0.147465	0.0499331	0.271142	TRUE	None
CDC45	3	-2.96798	1.54814	3	-2.68164	1.22361	-0.0277214	0.774966	0.930696	FALSE	None
CDK11A	3	-2.02586	0.176621	3	-1.62919	0.0673403	0.0756565	0.296493	0.649584	FALSE	None
CDK13	3	0.103872	0.0378055	3	0.0697037	0.00874537	-0.0886784	0.199151	0.561545	FALSE	None
CDK4	3	-1.60258	0.0547494	3	-1.0912	0.0807444	0.256876	0.00992885	0.115266	TRUE	None
CDK5	3	-0.0981876	0.0212486	3	-0.0474846	0.0108306	-0.0270136	0.681239	0.888956	FALSE	None
CDK6	3	-0.472515	0.032049	3	-0.431398	0.0247097	-0.102573	0.0684952	0.326215	FALSE	None
CDKN1B	3	-0.0165353	0.010872	3	0.181192	0.0112831	0.148361	0.011341	0.124505	TRUE	None
CDKN2A	3	0.0428823	0.0206754	3	0.198442	0.00473648	0.111151	0.0983304	0.400458	FALSE	None
CDKN2B	3	0.0507294	0.00206728	3	0.144268	0.00385259	0.0417355	0.536485	0.824783	FALSE	None
CDS2	3	-2.01725	0.506012	3	-1.81618	0.517868	-0.119133	0.199595	0.561545	FALSE	None
CDX2	3	-0.093591	0.0147166	3	-0.0796838	0.0311977	-0.0636145	0.299532	0.651999	FALSE	None
CELF1	3	-0.417176	0.0097717	3	-0.011824	0.0168773	0.299655	0.00069492	0.0255439	TRUE	None
CELSR2	3	-0.287706	0.016154	3	-0.243426	0.0105938	-0.0646288	0.41383	0.751023	FALSE	None
CHD1L	3	0.0153847	0.0122432	3	0.0321627	0.000342335	-0.0436854	0.440287	0.768031	FALSE	None
CHD2	3	-0.138375	0.0141517	3	-0.0711866	0.00887926	-0.0180765	0.760923	0.923717	FALSE	None
CHD4	3	-1.08756	0.108878	3	-0.830953	0.0412012	0.0503218	0.441525	0.768863	FALSE	None
CHD8	3	-0.175385	0.0318082	3	-0.176092	0.00565044	-0.0943507	0.271147	0.635647	FALSE	None
CHEK1	3	-2.41741	4.81044	3	-2.81685	6.03839	-0.550616	0.00142957	0.0378479	TRUE	None
CHEK2	3	-0.22551	0.1266	3	-0.129479	0.0341086	-0.00190072	0.980595	0.989412	FALSE	None
CHMP5	3	-1.55993	0.180781	3	-1.24683	0.0152717	0.0495941	0.634695	0.870981	FALSE	None
CHTF18	3	-0.468183	0.0254017	3	-0.316662	0.0663773	0.0199149	0.782386	0.930754	FALSE	None
CIT	3	-0.213464	0.00082193	3	-0.0744848	0.00332263	0.0452116	0.468735	0.78123	FALSE	None
CLPP	3	-0.176906	0.0524506	3	-0.0910017	0.0259471	-0.00108169	0.983759	0.991613	FALSE	None
CLPX	3	0.0291898	0.022477	3	0.0919605	0.0048051	0.00826487	0.867714	0.956759	FALSE	None
CLSPN	3	-0.616749	0.00683798	3	-0.597318	0.00978182	-0.150267	0.0292238	0.213648	TRUE	None
COIL	3	-0.210717	0.0679554	3	-0.223408	0.0879622	-0.120802	0.0889642	0.372838	FALSE	None
COMMD8	3	-0.350921	0.0210571	3	-0.20666	0.013225	0.0295836	0.646496	0.875941	FALSE	None
COQ2	3	-0.0753675	0.0437074	3	0.0020453	0.0274625	0.00719024	0.920063	0.973037	FALSE	None
COQ7	3	-0.146033	0.0153638	3	0.00290807	0.00180638	0.0644371	0.301361	0.654569	FALSE	None
COX5A	3	-0.421396	0.0558792	3	-0.294627	0.0595694	0.00342682	0.964008	0.982165	FALSE	None
CPD	3	-0.184379	0.0216676	3	-0.0420843	0.00590051	0.0547168	0.329188	0.684814	FALSE	None
CPOX	3	-0.366018	0.0893091	3	-0.22906	0.00332216	0.0244366	0.781939	0.930754	FALSE	None
CRABP2	3	-0.127982	0.0186506	3	-0.0150671	0.012835	0.0342696	0.579462	0.855639	FALSE	None
CRAMP1	3	-0.0662666	0.00617546	3	0.044965	0.00262497	0.0407617	0.455688	0.772324	FALSE	None
CREBBP	3	0.252525	0.174625	3	0.148533	0.0351528	-0.15154	0.0578269	0.298745	TRUE	None
CS	3	-0.251713	0.0817624	3	-0.253172	0.00823288	-0.110251	0.132235	0.468461	FALSE	None
CSK	3	-0.399385	0.0727586	3	-0.114304	0.0139287	0.178429	0.036572	0.23678	TRUE	None
CSNK2A2	3	-0.367914	0.00419318	3	-0.188014	0.00768757	0.0734619	0.198987	0.561545	FALSE	None
CTDNEP1	3	-0.992886	0.194597	3	-0.802488	0.0693801	-0.00994063	0.865089	0.955952	FALSE	None
CTNNA1	3	-0.126122	0.00239465	3	-0.0947692	0.000150001	-0.0595644	0.260334	0.626549	FALSE	None
CTNNB1	3	-0.306549	0.127923	3	-0.0733988	0.0272099	0.137513	0.0459157	0.263493	TRUE	None
CUL4A	3	0.00261182	0.00725783	3	0.0785719	0.00225468	0.0169756	0.77102	0.929272	FALSE	None
CUL5	3	0.460635	9.54015e-05	3	0.447844	0.00951986	-0.0359377	0.532257	0.823571	FALSE	None
TASL	3	-0.100941	0.018547	3	0.0277079	0.00512165	0.0570424	0.472267	0.78195	FALSE	None
CFAP47	3	-0.0721963	0.00640349	3	-0.0502426	0.00121087	-0.0587235	0.37264	0.722802	FALSE	None
BCLAF3	3	-0.122859	0.00789801	3	-0.0134224	0.0109231	0.0255887	0.64054	0.872558	FALSE	None
LINC01560	3	-0.118341	0.00367393	3	-0.0428481	0.00142046	-0.0113747	0.846738	0.953678	FALSE	None
H2AP	3	-0.0671335	0.0218724	3	-0.0289875	0.0143793	-0.0395287	0.471449	0.781878	FALSE	None
LINC01545	3	-0.160696	0.00307149	3	-0.0766058	0.000916445	-0.00581759	0.924063	0.973037	FALSE	None
DIPK2B	3	-0.0174419	0.00303418	3	-0.004909	0.01105	-0.0558495	0.450928	0.771824	FALSE	None
CXXC1	3	0.0565141	0.00317876	3	-0.108272	0.0141552	-0.239057	0.00571295	0.084854	TRUE	None
CYB5B	3	-0.261093	0.0115068	3	-0.0654773	0.00642579	0.101379	0.10338	0.411774	FALSE	None
CYB5R4	3	-0.300308	0.012019	3	-0.341241	0.0291241	-0.162744	0.021792	0.197131	TRUE	None
DAPK3	3	-0.0857309	0.00578869	3	0.0617021	0.00411411	0.0775194	0.17371	0.534803	FALSE	None
DAXX	3	-0.606701	0.0190881	3	-0.804105	0.105982	-0.37489	0.000242313	0.0128809	TRUE	None
DAZAP1	3	-0.406053	0.423101	3	-0.24264	0.311002	0.0496763	0.451836	0.771824	FALSE	None
DBF4	3	-0.70945	0.0151912	3	-0.599148	0.00246243	-0.0670399	0.320526	0.678542	FALSE	None
DCLRE1A	3	-0.0473474	0.00673916	3	0.0738536	0.0198937	0.0559643	0.28573	0.638226	FALSE	None
DCLRE1B	3	-0.615938	0.0773769	3	-0.416976	0.0306373	0.0501755	0.505599	0.805247	FALSE	None
DCLRE1C	3	-0.0135301	0.00841972	3	-0.0143852	0.0208142	-0.0690198	0.274843	0.635905	FALSE	None
DCTN1	3	-0.838418	0.113741	3	-0.583913	0.100675	0.0829139	0.225659	0.588928	FALSE	None
DCTN3	3	-1.2036	0.0593213	3	-0.781644	0.0562935	0.209473	0.00373016	0.0646111	TRUE	None
DDB1	3	-1.59111	0.301353	3	-1.10262	0.167116	0.22697	0.0111944	0.124246	TRUE	None
DDB2	3	-0.142873	0.00285354	3	-0.117304	0.0209027	-0.0640018	0.286939	0.638345	FALSE	None
DDI2	3	-0.420695	0.00675845	3	-0.229186	0.00502069	0.0744105	0.182744	0.549693	FALSE	None
DDX5	3	-0.586284	0.0185634	3	-0.347174	5.41062e-05	0.0959713	0.125265	0.460065	FALSE	None
DET1	3	-0.263072	0.000124527	3	-0.141664	0.00403295	0.021176	0.776806	0.930754	FALSE	None
DHX29	3	0.201745	0.0138826	3	0.24485	0.0205127	0.00888541	0.88764	0.965034	FALSE	None
DHX35	3	-0.696682	0.0124283	3	-0.53691	0.0515171	-0.00799641	0.912175	0.973037	FALSE	None
DIAPH1	3	-0.26457	0.00346186	3	-0.117202	0.0222748	0.050675	0.52011	0.815398	FALSE	None
DIS3L	3	-0.285802	0.0278105	3	-0.120599	0.00164683	0.0652588	0.284777	0.63775	FALSE	None
DNA2	3	-1.90061	0.822788	3	-1.75866	0.759359	-0.149559	0.0805162	0.355115	FALSE	None
DNAJB5	3	-0.300526	0.072589	3	-0.201448	0.00224347	-0.00520994	0.942362	0.974582	FALSE	None
DNMT3A	3	-0.163167	0.0023169	3	-0.150827	0.0307594	-0.0785197	0.246088	0.61828	FALSE	None
DOCK2	3	0.0269916	0.0027853	3	0.044634	0.000911436	-0.0409697	0.465569	0.78123	FALSE	None
DOT1L	3	-0.0401129	0.0161089	3	0.101697	0.000815328	0.0791999	0.200569	0.561545	FALSE	None
DPF2	3	-0.836018	0.0183812	3	-0.642144	0.0150944	0.00576208	0.930921	0.973037	FALSE	None
DPM2	3	-0.583202	0.103639	3	-0.242715	0.0754276	0.209578	0.00379166	0.0646111	TRUE	None
DVL3	3	-0.105165	0.0179863	3	-0.149805	0.0304879	-0.135912	0.0540635	0.285972	TRUE	None
DYRK1A	3	0.631397	0.0628934	3	0.482211	0.0155206	-0.169208	0.0142605	0.142605	TRUE	None
E2F3	3	-0.600787	0.000852493	3	-0.443359	0.00685716	0.00584798	0.933639	0.973037	FALSE	None
E2F7	3	-0.20848	0.0532523	3	-0.00609193	0.00326954	0.111101	0.100732	0.406958	FALSE	None
ECSIT	3	-0.0284441	0.0331932	3	0.115109	0.0191907	0.078887	0.174208	0.534803	FALSE	None
EDC3	3	-0.408222	0.00242153	3	-0.333682	0.0411331	-0.0496096	0.514197	0.809019	FALSE	None
EDF1	3	-0.264949	0.10157	3	-0.069636	0.0118709	0.10685	0.211897	0.572173	FALSE	None
EED	3	-0.138344	0.0238947	3	-0.0234652	0.00931046	0.0315938	0.610991	0.860671	FALSE	None
EEFSEC	3	-1.77403	1.00175	3	-1.39368	0.65794	0.0902009	0.180163	0.544803	FALSE	None
EGFR	3	0.0219773	0.0131127	3	0.0449771	0.0231617	-0.0418316	0.567836	0.845891	FALSE	None
EHMT2	3	-0.351273	0.0167588	3	-0.413842	0.0031084	-0.186648	0.00796277	0.0992888	TRUE	None
EIF2AK4	3	0.0323006	0.022959	3	0.0238316	0.0218166	-0.0666185	0.363424	0.714121	FALSE	None
EIF2S1	3	-3.28784	0.341877	3	-2.92574	0.0127409	-0.0156218	0.926099	0.973037	FALSE	None
EIF3I	3	-3.18992	0.045417	3	-2.78708	0.0534852	0.0297283	0.797287	0.934176	FALSE	None
EIF4A1	3	-2.51725	0.0150467	3	-1.80219	0.0329907	0.353557	0.000449544	0.0181747	TRUE	None
EIF4B	3	-0.788683	0.400359	3	-0.522874	0.122666	0.102281	0.241156	0.608495	FALSE	None
EIF4ENIF1	3	-0.866006	0.00896953	3	-0.603841	0.00321096	0.0738188	0.293313	0.644013	FALSE	None
EIF4G1	3	-0.968068	0.203012	3	-0.652338	0.188202	0.128264	0.0687959	0.326215	FALSE	None
EIF4H	3	-0.562923	0.0180162	3	-0.354542	0.00843044	0.0700445	0.21517	0.574925	FALSE	None
ELAVL1	3	-0.612888	0.0116959	3	-0.494107	0.006447	-0.0394029	0.479913	0.788149	FALSE	None
ELF2	3	-0.369201	0.0294331	3	-0.0896922	0.0033773	0.173309	0.0295867	0.213648	TRUE	None
ELMO1	3	-0.0471703	0.00511786	3	-0.0193884	0.0161506	-0.0421938	0.431034	0.75844	FALSE	None
EME1	3	-0.354611	0.00477364	3	-0.149452	0.0151842	0.0964629	0.130268	0.466562	FALSE	None
EP300	3	0.451143	0.00789169	3	0.471903	0.0173551	0.00349759	0.948796	0.975792	FALSE	None
EPC2	3	-0.293034	0.0158322	3	-0.208438	0.0175559	-0.0249194	0.687694	0.889962	FALSE	None
EPHA7	3	0.022075	0.0189273	3	0.0445093	0.00040196	-0.0380841	0.553948	0.835708	FALSE	None
ERBB2	3	-0.251072	0.0347066	3	-0.151864	0.00365039	-0.00426529	0.948394	0.975792	FALSE	None
ERBB3	3	-0.0583951	0.049236	3	0.103215	0.00025592	0.0991383	0.125983	0.461024	FALSE	None
ERCC1	3	-0.383681	0.00450122	3	-0.12194	0.00254282	0.152662	0.00732743	0.0936798	TRUE	None
ERCC2	3	-1.36788	0.0641383	3	-0.619202	0.0458521	0.537007	1.71908e-07	5.3272e-05	TRUE	None
ERCC4	3	-0.10935	0.0244504	3	0.00692855	0.00702697	0.0356675	0.49288	0.796494	FALSE	None
ERCC6	3	-0.00301839	0.0254806	3	-0.0206721	0.00933745	-0.0850616	0.176027	0.538749	FALSE	None
ERCC8	3	-0.0886274	0.0175619	3	-0.0502857	0.0092904	-0.0429802	0.42686	0.756505	FALSE	None
ERG	3	0.0317118	0.0042323	3	0.107974	0.0104852	0.0206994	0.745543	0.911959	FALSE	None
ETFA	3	0.041644	0.0326027	3	-0.0110993	0.00446597	-0.119446	0.0493926	0.27072	TRUE	None
ETV1	3	-0.1366	0.0650444	3	-0.047386	0.0239053	0.00629682	0.902774	0.968971	FALSE	None
EXO1	3	-0.00415922	0.00774506	3	-0.0544996	0.00928828	-0.12052	0.029464	0.213648	TRUE	None
EXT1	3	0.189616	0.00673452	3	0.290215	0.0222329	0.0694283	0.318343	0.677331	FALSE	None
EXT2	3	-0.0488848	0.0639379	3	0.127618	0.04393	0.112407	0.0534422	0.285591	TRUE	None
EXTL3	3	0.21606	0.00247172	3	0.199264	0.000601484	-0.0478037	0.418643	0.755895	FALSE	None
EZH2	3	0.0542483	0.0331256	3	0.145823	0.00927034	0.0402861	0.500762	0.801704	FALSE	None
F2R	3	-0.140886	0.0125785	3	0.0761031	0.018085	0.145769	0.0158384	0.15495	TRUE	None
FAM111A	3	0.0158266	0.0427622	3	0.035633	0.0321055	-0.0412934	0.443394	0.770788	FALSE	None
FAM111B	3	0.022308	0.000282475	3	-0.0403871	0.0152047	-0.133263	0.0381235	0.243701	TRUE	None
FAM136A	3	-0.460389	0.0486665	3	-0.339033	0.020631	-0.00538618	0.933846	0.973037	FALSE	None
ABRAXAS1	3	-0.411874	0.000322022	3	-0.231278	0.00218511	0.0705013	0.337501	0.68725	FALSE	None
SHLD2	3	-0.463825	0.0241438	3	-0.285355	0.036041	0.0561471	0.321829	0.678595	FALSE	None
TENT5C	3	-0.0777924	0.00858772	3	-0.0366728	0.0146257	-0.038886	0.500501	0.801704	FALSE	None
SINHCAF	3	-0.822731	0.579478	3	-0.611881	0.356043	0.0412111	0.604334	0.856704	FALSE	None
FAN1	3	-0.152193	0.00310793	3	-0.0678647	0.00287774	-0.00706595	0.909013	0.973037	FALSE	None
FANCA	3	-0.181309	0.0064538	3	-0.133811	0.000264634	-0.0438706	0.414178	0.751023	FALSE	None
FANCB	3	-0.0806879	0.00405876	3	0.0248738	0.0188194	0.0312305	0.586164	0.856269	FALSE	None
FANCC	3	-0.183382	0.00182295	3	-0.192076	0.00571541	-0.103857	0.136835	0.476858	FALSE	None
FANCD2	3	-0.446963	0.00185828	3	-0.269334	0.00648191	0.0610132	0.283322	0.63775	FALSE	None
FANCD2OS	3	-0.024462	0.0574545	3	-0.0308592	0.00226472	-0.0805008	0.260545	0.626549	FALSE	None
FANCE	3	-0.298594	0.00815865	3	-0.17924	0.00446642	0.0138819	0.814786	0.939078	FALSE	None
FANCF	3	-0.270476	0.0603562	3	-0.298326	0.0309681	-0.14499	0.0290508	0.213648	TRUE	None
FANCG	3	-0.249589	0.0238913	3	-0.184153	0.0179308	-0.0295332	0.642755	0.872558	FALSE	None
FANCI	3	-0.259781	0.00713835	3	-0.0530537	0.00355418	0.112519	0.079502	0.35218	FALSE	None
FANCL	3	-0.196178	0.00488532	3	-0.270252	0.0258737	-0.173957	0.0268112	0.211557	TRUE	None
FANCM	3	-0.272362	0.225199	3	-0.315199	0.183306	-0.156242	0.0138591	0.14033	TRUE	None
FASN	3	-0.415528	0.0237044	3	-0.0500431	0.00251262	0.250354	0.000197933	0.0116896	TRUE	None
FASTKD1	3	-0.185124	0.0452515	3	0.0390562	0.0302164	0.143379	0.033078	0.222725	TRUE	None
FBRSL1	3	-0.33974	0.0726258	3	-0.218792	0.0586611	0.00876246	0.860694	0.954227	FALSE	None
FBXW7	3	0.221091	0.0111257	3	-0.0392072	0.0200598	-0.309266	0.00017131	0.0115349	TRUE	None
FDX1	3	-0.405941	0.012211	3	-0.391222	0.0364436	-0.120168	0.0737131	0.336259	FALSE	None
FDX2	3	-1.34111	0.275066	3	-0.781672	0.0888054	0.333325	0.000323446	0.0155562	TRUE	None
FECH	3	-0.2554	0.0395581	3	-0.132015	0.0220148	0.0251866	0.693248	0.891728	FALSE	None
FEM1B	3	-0.131553	0.00126539	3	-0.0019691	0.0130799	0.051077	0.425086	0.755895	FALSE	None
FEN1	3	-1.0174	0.0231073	3	-0.564185	0.0550751	0.262201	0.00185634	0.0416645	TRUE	None
FGFR1	3	-0.0505612	0.0230016	3	-0.0149528	0.0487391	-0.0325795	0.64186	0.872558	FALSE	None
FGFR2	3	-0.0364371	0.00351287	3	0.0949455	0.000488183	0.0713243	0.335937	0.686834	FALSE	None
FGFR3	3	-0.00421433	0.0142366	3	0.0954432	0.00228833	0.041367	0.547861	0.83084	FALSE	None
FGFR4	3	-0.039883	0.0112265	3	0.146377	0.00970012	0.128953	0.0282166	0.213648	TRUE	None
FH	3	0.0328407	0.00267304	3	0.115246	0.00478606	0.0306818	0.606479	0.856704	FALSE	None
FIBP	3	-0.264909	0.0406351	3	-0.104878	0.0213425	0.0621608	0.236972	0.601362	FALSE	None
FLCN	3	-0.303062	0.0212424	3	-0.218079	0.00195437	-0.0208683	0.808158	0.939078	FALSE	None
FLNB	3	-0.137134	0.0413371	3	-0.0774705	0.0467772	-0.0212109	0.732924	0.907612	FALSE	None
FOSL1	3	-1.1156	0.614231	3	-0.620395	0.26702	0.305905	0.000987875	0.0299717	TRUE	None
FOXA1	3	-0.0904792	0.0315345	3	-0.0802455	0.0511518	-0.0748365	0.42272	0.755895	FALSE	None
FOXK1	3	-0.303126	0.0264621	3	-0.30997	0.0521487	-0.126368	0.0606294	0.303147	FALSE	None
FOXM1	3	-0.892759	0.186662	3	-0.727296	0.125098	-0.0186116	0.819912	0.942078	FALSE	None
FPGS	3	-0.0407985	0.0167208	3	-0.154028	0.00532833	-0.199942	0.00383828	0.0646111	TRUE	None
MRM2	3	-0.282304	0.0175119	3	-0.183419	0.00492839	-0.00816983	0.885682	0.963943	FALSE	None
FURIN	3	-0.386007	0.073861	3	-0.224206	0.0211099	0.0504662	0.478484	0.787825	FALSE	None
FZD1	3	-0.101768	0.00260671	3	-0.0208671	0.00871552	0.00141379	0.979583	0.989378	FALSE	None
FZD10	3	-0.0683961	0.0345016	3	0.0899794	0.00263061	0.0951414	0.212327	0.572173	FALSE	None
FZD2	3	-0.229259	0.00150757	3	-0.0185787	0.0042886	0.115788	0.0729927	0.336259	FALSE	None
FZD3	3	0.079218	0.00761847	3	0.0725596	0.0386846	-0.062869	0.310937	0.668183	FALSE	None
FZD4	3	-0.146226	0.00740398	3	-0.0489389	0.00600156	0.0131965	0.83099	0.945314	FALSE	None
FZD5	3	-0.135646	0.00528576	3	-0.0864209	0.0088608	-0.0397556	0.499968	0.801704	FALSE	None
FZD6	3	-0.106631	0.0190372	3	0.0332056	0.0170619	0.0721809	0.200711	0.561545	FALSE	None
FZD7	3	-0.11227	0.0231855	3	-0.0622378	0.00525793	-0.0317369	0.601922	0.856704	FALSE	None
FZD8	3	-0.131069	0.0302548	3	0.0112566	0.0119567	0.0625718	0.50989	0.80806	FALSE	None
FZD9	3	-0.154893	0.0014317	3	-0.0784415	0.0031033	-0.0146422	0.785766	0.930998	FALSE	None
G6PD	3	-0.489724	0.0367626	3	-0.229579	0.0084798	0.135024	0.0508477	0.274632	TRUE	None
GANAB	3	-0.224756	0.0241166	3	-0.0644389	0.0197363	0.0675014	0.284751	0.63775	FALSE	None
GATA3	3	0.0994141	4.22256e-08	3	0.0742808	0.0038873	-0.0737283	0.196824	0.561545	FALSE	None
GATAD1	3	-0.244394	0.0242142	3	-0.326347	0.0179033	-0.193166	0.00559402	0.0843277	TRUE	None
GCLC	3	-0.252172	0.00866162	3	-0.118084	0.0102031	0.0411083	0.596845	0.856269	FALSE	None
GCLM	3	-0.187919	0.0191024	3	-0.00373432	0.00377433	0.0941805	0.104365	0.413357	FALSE	None
GCN1	3	-0.297916	0.0171631	3	-0.238633	0.00371861	-0.0524941	0.491141	0.796233	FALSE	None
GCSH	3	-0.473419	0.0543975	3	-0.285666	0.0538962	0.0557574	0.370869	0.722802	FALSE	None
GEMIN6	3	-0.515168	0.280191	3	-0.385929	0.0483835	-0.0130217	0.892547	0.965096	FALSE	None
GEN1	3	-0.075752	0.00234552	3	-0.0964848	0.00649241	-0.106639	0.073197	0.336259	FALSE	None
GGNBP2	3	-0.584714	0.00446519	3	-0.372073	0.0037164	0.0653784	0.276807	0.635905	FALSE	None
GHDC	3	-0.362619	0.0148034	3	-0.193396	0.00687575	0.0553729	0.370684	0.722802	FALSE	None
GID8	3	-0.582864	0.0150673	3	-0.491743	0.0230819	-0.0667842	0.43086	0.75844	FALSE	None
GJC1	3	-0.22059	0.0369412	3	-0.132513	0.0288083	-0.0041201	0.939492	0.974582	FALSE	None
GLS	3	-0.120595	0.00122935	3	-0.0237619	0.000489584	0.0133636	0.814554	0.939078	FALSE	None
GNA13	3	-0.244538	0.0184377	3	-0.207298	0.0113026	-0.0706957	0.267859	0.635647	FALSE	None
GNL2	3	-2.06831	0.901889	3	-1.51837	0.388376	0.248426	0.0292677	0.213648	TRUE	None
GNPTG	3	-0.0635686	0.023467	3	0.0215093	0.0182608	0.0119074	0.828555	0.944515	FALSE	None
GOT1	3	-0.127693	0.0116441	3	-0.0218635	0.00986269	0.0183084	0.725688	0.902641	FALSE	None
GOT2	3	-0.375996	0.0787925	3	-0.198633	0.0400535	0.058716	0.448492	0.771102	FALSE	None
GPX4	3	-3.76581	0.461646	3	-3.56616	0.979391	-0.030758	0.880064	0.962209	FALSE	None
GRHL2	3	-0.0675027	0.00469666	3	0.0330926	0.0104332	0.0304123	0.582559	0.856269	FALSE	None
GRK6	3	-0.124813	0.137328	3	0.021293	0.0598189	0.0766897	0.203361	0.563066	FALSE	None
GRSF1	3	-0.234057	0.0196021	3	-0.0896244	0.0184657	0.0490002	0.421213	0.755895	FALSE	None
GSK3B	3	0.224637	0.00908311	3	0.00369684	0.00935402	-0.26849	3.87107e-05	0.00325815	TRUE	None
GSPT1	3	-0.981163	0.673688	3	-0.761972	0.400563	0.0209428	0.778794	0.930754	FALSE	None
GSS	3	-0.0763029	7.26038e-05	3	-0.0435864	0.0121183	-0.0470649	0.448821	0.771102	FALSE	None
GSTP1	3	-0.222827	0.00409987	3	-0.258165	0.0202137	-0.141175	0.0584692	0.299766	TRUE	None
GTPBP3	3	-0.0455469	0.0533789	3	0.101005	0.0100081	0.078886	0.227741	0.589792	FALSE	None
HADHA	3	-0.332534	0.0531351	3	-0.279631	0.0273396	-0.0659881	0.232585	0.59622	FALSE	None
HAX1	3	-0.15436	0.0622595	3	-0.0760075	0.0710447	-0.0103406	0.858841	0.954227	FALSE	None
HCN1	3	-0.129694	0.00535687	3	-0.0652489	0.0229448	-0.0208761	0.74582	0.911959	FALSE	None
HDAC2	3	-0.0440001	0.00296407	3	-0.0147918	0.0142121	-0.044173	0.455748	0.772324	FALSE	None
HDAC3	3	-1.76027	0.0269216	3	-1.43111	0.0330169	0.034389	0.659057	0.883652	FALSE	None
HEATR3	3	-0.818785	0.0360032	3	-0.54636	0.069192	0.0979987	0.16044	0.51653	FALSE	None
HECTD1	3	-0.676031	0.0227085	3	-0.489689	0.0209882	0.0245045	0.659677	0.883652	FALSE	None
HEXIM1	3	-0.051562	0.0130866	3	0.0221352	0.00871456	0.00254398	0.96131	0.981952	FALSE	None
HIGD2A	3	-0.18077	0.0449538	3	-0.0858756	0.00612966	0.00933884	0.874306	0.961423	FALSE	None
H1-2	3	-0.187472	0.016106	3	-0.168193	0.0181948	-0.0722067	0.278325	0.635905	FALSE	None
HK2	3	-0.403431	0.0385441	3	-0.193842	0.0468706	0.0895598	0.165446	0.524992	FALSE	None
HLTF	3	-0.0836665	0.0191903	3	0.110735	0.00164564	0.131499	0.0287133	0.213648	TRUE	None
ARHGAP45	3	-0.217478	0.0695172	3	-0.187824	0.105799	-0.0697387	0.329245	0.684814	FALSE	None
HNRNPD	3	-0.22931	0.0109246	3	-0.126587	0.0197466	0.00806257	0.883071	0.963176	FALSE	None
HNRNPK	3	-2.43444	0.744251	3	-2.3901	0.886947	-0.297115	0.0595999	0.300517	FALSE	None
UBE2A	6	-0.08702	0.00578376	6	-0.0145188	0.00438393	-0.00489842	0.915809	0.973037	FALSE	None
UBE2E1	3	-0.0189795	0.0271628	3	0.0409289	0.00826866	-0.00468609	0.933208	0.973037	FALSE	None
RIDA	3	-0.21978	0.0511645	3	-0.130837	0.0201236	-8.38284e-05	0.999206	0.999206	FALSE	None
HSD17B4	3	-0.0681442	0.00838238	3	-0.122165	0.0146857	-0.137215	0.024621	0.203274	TRUE	None
HSD17B6	3	0.0216695	0.000146857	3	0.0630896	0.00477206	-0.016779	0.763821	0.925011	FALSE	None
HSF1	3	-0.120031	0.00531184	3	0.0638059	0.022595	0.116841	0.0742433	0.336259	FALSE	None
HTRA2	3	-0.315711	0.00923845	3	-0.237961	0.00740089	-0.0299546	0.62845	0.868491	FALSE	None
HUS1	3	-0.536201	0.0558675	3	-1.52974	0.257787	-1.21137	6.98317e-10	3.5265e-07	TRUE	Negative
MRPL58	3	-0.250177	0.00328458	3	-0.164237	0.00586707	-0.0118971	0.821754	0.942078	FALSE	None
ID4	3	-0.0362879	0.050697	3	-0.0631429	0.00297593	-0.0985671	0.158308	0.515158	FALSE	None
IDH1	3	-0.0847661	0.00420198	3	-0.0438489	0.0261087	-0.0371045	0.57241	0.850197	FALSE	None
IDH2	3	-0.0911501	0.011482	3	0.020352	0.00165484	0.0394866	0.420525	0.755895	FALSE	None
IDH3A	3	-0.00461288	0.0158062	3	0.0346454	0.0053256	-0.0244693	0.679785	0.888956	FALSE	None
IER3IP1	3	-0.202097	0.0010878	3	-0.0140778	0.0103194	0.100859	0.103555	0.411774	FALSE	None
IMPDH2	3	-0.551496	0.014225	3	-0.299531	0.00885748	0.112053	0.192498	0.561545	FALSE	None
ING2	3	0.291936	0.0136133	3	0.286828	0.0107737	-0.0317305	0.650828	0.878792	FALSE	None
ING5	3	-0.187288	0.0412595	3	-0.169234	0.0262486	-0.078043	0.320618	0.678542	FALSE	None
INO80B	3	-0.702869	0.0405262	3	-0.691858	0.139614	-0.162221	0.0438852	0.263493	TRUE	None
INO80D	3	-0.0629738	0.0310698	3	-0.154409	0.00390571	-0.17504	0.00790974	0.0992888	TRUE	None
INPP4A	3	-0.274564	0.0419651	3	-0.222243	0.0119921	-0.0564193	0.335873	0.686834	FALSE	None
INPPL1	3	-0.302242	0.016124	3	-0.305707	0.0751753	-0.11461	0.186571	0.552645	FALSE	None
INSR	3	0.00026331	0.0042694	3	0.0490393	0.00224568	-0.0145741	0.842032	0.950226	FALSE	None
IQCH	3	-0.165578	0.0172235	3	-0.0376926	0.00519152	0.0437077	0.406244	0.745886	FALSE	None
IREB2	3	0.096389	0.0187155	3	0.02815	0.00311154	-0.123882	0.0672712	0.325091	FALSE	None
IRF2BP1	3	-0.0713185	0.0156695	3	-0.0407048	0.00250311	-0.0464397	0.470948	0.781878	FALSE	None
IRS2	3	-0.156873	0.0242872	3	-0.0244344	0.0275972	0.0521697	0.392071	0.738831	FALSE	None
ITGA1	3	-0.21056	0.0131176	3	-0.193618	0.0089166	-0.0766002	0.192985	0.561545	FALSE	None
ITGA2	3	-0.102962	0.0173048	3	0.0460995	0.0155405	0.0751275	0.234812	0.598041	FALSE	None
ITGA3	3	-0.246788	0.0159778	3	-0.03952	0.00884564	0.112771	0.0560062	0.293089	TRUE	None
ITGA4	3	-0.0907894	0.000548585	3	-0.091328	0.0014397	-0.0881963	0.166774	0.524992	FALSE	None
ITGA5	3	-0.233179	0.00636775	3	0.0531754	0.0165943	0.202322	0.00621187	0.0856279	TRUE	None
ITGA6	3	0.0672819	0.0088761	3	-0.0094482	0.0208447	-0.133305	0.0277159	0.213648	TRUE	None
ITGA7	3	-0.0991577	0.0183613	3	0.0221969	0.041621	0.0442719	0.525421	0.819564	FALSE	None
ITGA9	3	-0.057316	0.00197791	3	0.0766632	0.00790483	0.070503	0.230513	0.592412	FALSE	None
ITGAE	3	-0.00409697	0.0252445	3	0.0608076	0.0181004	0.000249052	0.996971	0.99817	FALSE	None
ITGAV	3	-2.03039	2.27837	3	-1.70398	1.75934	0.0603404	0.514146	0.809019	FALSE	None
ITGB1	3	0.397893	0.0115013	3	0.541234	0.00422518	0.125348	0.0277439	0.213648	TRUE	None
ITGB4	3	-0.263936	0.0902835	3	-0.0701632	0.0259509	0.0990169	0.117986	0.439725	FALSE	None
ITGB5	3	-3.83198	0.045102	3	-3.24911	0.00642185	0.282542	0.0595791	0.300517	FALSE	None
JAK2	3	0.0386782	0.0132045	3	0.130942	0.00713715	0.0422277	0.451089	0.771824	FALSE	None
JTB	3	-0.991015	0.00645702	3	-0.821355	0.00461164	-0.0328887	0.582505	0.856269	FALSE	None
KAT6A	3	0.00970552	0.0122281	3	-0.0329414	0.00346705	-0.113722	0.024048	0.203274	TRUE	None
KAT7	3	-0.477013	0.0203468	3	-0.39494	0.00151	-0.0533469	0.401082	0.739199	FALSE	None
KCTD5	3	0.355536	0.0246102	3	0.408847	0.0229852	0.0246435	0.632095	0.870963	FALSE	None
KDELR3	3	-0.185832	0.0245903	3	-0.09694	0.0114904	0.00107734	0.986764	0.99365	FALSE	None
KDM5A	3	0.0844769	0.00439716	3	-0.0564049	0.0478425	-0.204898	0.00717786	0.0929441	TRUE	None
KDM5C	3	-0.772784	0.0322353	3	-0.583876	0.000649886	0.00833765	0.895467	0.965096	FALSE	None
KDM6A	3	0.0269289	0.0152068	3	0.094695	0.0385875	0.0126875	0.860313	0.954227	FALSE	None
KEAP1	3	0.862197	0.0249457	3	1.15668	0.0024252	0.225379	0.00447514	0.0706232	TRUE	None
KIAA0100	3	-0.540232	0.0307013	3	-0.21559	0.0327714	0.194045	0.00172858	0.0410194	TRUE	None
KHDC4	3	-0.0353136	0.0247095	3	0.163886	0.0767706	0.136891	0.0284123	0.213648	TRUE	None
RIC1	3	-0.450888	0.0258448	3	-0.0699399	0.0307292	0.267957	0.00020833	0.0116896	TRUE	None
KIF14	3	-0.423537	0.0320312	3	-0.189124	0.00680173	0.121966	0.0677983	0.326077	FALSE	None
KIF18B	3	-0.267121	0.0082699	3	-0.134488	0.0185973	0.0331443	0.670142	0.883901	FALSE	None
KIF4A	3	-0.260449	0.000528413	3	-0.172033	0.00106194	-0.0170014	0.760374	0.923717	FALSE	None
KIRREL1	3	0.499268	0.0254467	3	0.449531	0.0330401	-0.0665395	0.261299	0.62687	FALSE	None
KLF10	3	-0.356952	0.0155063	3	-0.112021	0.0228682	0.1391	0.0648122	0.316234	FALSE	None
KLF4	3	-0.29051	0.130095	3	-0.202645	0.0316331	-0.0256548	0.717476	0.902279	FALSE	None
KLF5	3	-0.210319	0.0015526	3	-0.183208	0.0134369	-0.0711671	0.209807	0.572173	FALSE	None
KMT2A	3	-0.587032	0.085301	3	-0.753631	0.0303271	-0.34053	0.00075873	0.0255439	TRUE	None
KMT2C	3	0.00914156	0.011855	3	-0.00933115	0.0286811	-0.0866681	0.178445	0.54286	FALSE	None
KMT2D	3	0.0862868	0.0125885	3	0.260871	0.00623178	0.137714	0.0320422	0.221662	TRUE	None
KPNA4	3	-0.259735	0.0184033	3	-0.251543	0.0112292	-0.10171	0.216996	0.57541	FALSE	None
KRAS	3	-3.19704	0.833391	3	-3.05382	1.0493	-0.187461	0.252816	0.626549	FALSE	None
L3MBTL3	3	0.373347	0.0425714	3	0.450784	0.0164971	0.0533332	0.400488	0.739199	FALSE	None
LAMTOR5	3	-1.46066	0.147069	3	-1.14121	0.012676	0.0686309	0.468327	0.78123	FALSE	None
LARP7	3	-0.0408903	0.0291136	3	0.0474778	0.041231	0.0254517	0.634093	0.870981	FALSE	None
LCMT1	3	0.219257	0.00678697	3	0.0120691	0.00696869	-0.251267	9.1408e-05	0.00710169	TRUE	None
LDHA	3	-0.272033	0.0163842	3	-0.231226	0.0371729	-0.0697761	0.252215	0.626549	FALSE	None
LDHB	3	-0.00504178	5.52257e-05	3	0.0310172	0.00598569	-0.0297229	0.577776	0.854398	FALSE	None
LGR4	3	-0.0767297	0.0142897	3	-0.0599773	0.0105496	-0.0607417	0.258852	0.626549	FALSE	None
LIG1	3	-0.258512	0.0336129	3	-0.0833702	0.0371453	0.0812349	0.137792	0.477794	FALSE	None
LIG3	3	-0.0237273	0.0627104	3	-0.0686394	0.0534886	-0.115854	0.0444273	0.263493	TRUE	None
LIG4	3	-0.0325409	0.00464235	3	0.0449539	0.00269616	0.00752592	0.909232	0.973037	FALSE	None
LIMS1	3	-1.6829	0.54818	3	-1.29103	0.428847	0.120061	0.198638	0.561545	FALSE	None
LIN28B	3	-0.251008	0.0927605	3	-0.1163	0.0410039	0.0386468	0.507466	0.805881	FALSE	None
LIPT1	3	-0.165774	0.0706307	3	-0.157862	0.0173587	-0.086421	0.156911	0.515158	FALSE	None
LMNA	3	-0.102993	0.0773688	3	-0.021341	0.0478622	0.00794884	0.89286	0.965096	FALSE	None
LMO2	3	-0.119799	0.00346809	3	-0.231048	0.000917594	-0.20814	0.0043126	0.0691385	TRUE	None
LRP5	3	-0.363541	0.0514785	3	-0.216807	0.0417629	0.0320876	0.672319	0.884121	FALSE	None
LRP6	3	-0.256879	0.0061091	3	-0.248448	0.00870397	-0.0985204	0.147904	0.501287	FALSE	None
LRRC45	3	-0.00111698	0.0146499	3	-0.0162732	0.0113619	-0.0861622	0.127976	0.464556	FALSE	None
LRRC49	3	-0.0819735	0.000484462	3	0.0930815	0.00755406	0.109407	0.0970795	0.398578	FALSE	None
LYRM4	3	-2.60211	0.103864	3	-2.09294	0.0171634	0.134564	0.21706	0.57541	FALSE	None
MAD1L1	3	-0.410276	0.00270215	3	-0.219675	0.0222186	0.0764047	0.321132	0.678542	FALSE	None
MAD2L2	3	-0.689418	0.0914801	3	-0.502777	0.0502775	0.0256852	0.688179	0.889962	FALSE	None
MANF	3	-0.254811	0.0762766	3	-0.182768	0.0208659	-0.032263	0.540668	0.824783	FALSE	None
MAP2K1	3	-0.116916	0.0114109	3	-0.00908085	0.00312739	0.0338484	0.583441	0.856269	FALSE	None
MAP2K4	3	-0.0309088	0.0978313	3	0.0189108	0.059893	-0.0172458	0.805517	0.939078	FALSE	None
MAP2K5	3	-0.523358	0.0241053	3	-0.239391	0.00433685	0.16127	0.0388852	0.245463	TRUE	None
MAP3K1	3	-0.21172	0.0689124	3	-0.0752578	0.0487934	0.0465967	0.418579	0.755895	FALSE	None
MAP4K4	3	0.386892	0.0358397	3	0.44157	0.0148057	0.0351955	0.565071	0.844263	FALSE	None
MAPK1	3	-0.296592	0.0221736	3	-0.244528	0.0147685	-0.0576193	0.362643	0.713975	FALSE	None
MARCHF5	3	-0.0337083	0.00163802	3	-0.00141052	0.00172155	-0.0376094	0.465599	0.78123	FALSE	None
MARK2	3	-1.17549	0.0203558	3	-1.08279	0.0345867	-0.131747	0.0793246	0.35218	FALSE	None
MAT2B	3	-0.0588759	0.0156109	3	0.0208602	0.00478033	0.00665908	0.930384	0.973037	FALSE	None
MATR3	3	-0.694873	0.0290518	3	-0.362688	0.0107553	0.179019	0.00633611	0.0856279	TRUE	None
MBNL1	3	-0.447872	0.0111742	3	-0.245599	0.0163327	0.0834267	0.270763	0.635647	FALSE	None
MBTD1	3	-0.49334	0.0113612	3	-0.333932	0.00374128	0.0301873	0.616457	0.862357	FALSE	None
MCCC2	3	-0.255812	0.0252683	3	-0.151822	0.0391931	0.00453112	0.940223	0.974582	FALSE	None
MCL1	3	-0.0305712	0.00500521	3	0.0833708	0.00251811	0.0528091	0.312269	0.669622	FALSE	None
MCM10	3	-1.57745	0.836258	3	-1.34847	0.623007	-0.052905	0.628581	0.868491	FALSE	None
MCM2	3	-2.49376	0.323769	3	-2.31106	0.49388	-0.157682	0.138608	0.477794	FALSE	None
MCM3	3	-1.489	0.860894	3	-1.24716	0.452643	-0.0193691	0.812175	0.939078	FALSE	None
MCM4	3	-1.51902	0.269371	3	-1.42433	0.0688021	-0.179459	0.0872985	0.368918	FALSE	None
MCM5	3	-2.0462	1.2692	3	-1.70882	0.857547	0.0239316	0.789477	0.930998	FALSE	None
MCM6	3	-2.47613	0.864812	3	-2.12124	0.400749	0.00676686	0.949706	0.975792	FALSE	None
MCM7	3	-1.15431	0.925184	3	-0.970221	0.956697	-0.0353402	0.666347	0.883901	FALSE	None
MCM9	3	-0.190013	0.00398933	3	-0.306793	0.00605493	-0.218595	0.0297129	0.213648	TRUE	None
[truncated: 580 more rows]

## Sheet: HU_T12
gene	n_WT_T12_UT	mean_WT_T12_UT	variance_WT_T12_UT	n_WT_T12_HU	mean_WT_T12_HU	variance_WT_T12_HU	differential_WT_T12_HU_vs_WT_T12_UT	pval_WT_T12_HU_vs_WT_T12_UT	fdr_WT_T12_HU_vs_WT_T12_UT	significant_WT_T12_HU_vs_WT_T12_UT	effect_type_WT_T12_HU
[truncated: 1,010 more rows]

[truncated: 13 more sheets: HU_T18, CPT_T9, CPT_T12, CPT_T15, CPT_T18, OLA_T9, OLA_T12, OLA_T15, OLA_T18, COL_T9, COL_T12, COL_T15, COL_T18]
